# Supplementary material for: Enantioselective construction of ortho-substituted benzylic quaternary centers using a phenanthroline-Pd catalyst
Source: Royal Society of Chemistry journal article supplement (doi:10.1039/d2ob01743a), 2022-01-01
Supplement: d2ob01743a1.pdf [file d2ob01743a1.pdf]

## Supporting Information for:

### Enantioselective construction of *ortho*-substituted benzylic quaternary centers using a phenanthroline-Pd catalyst

Masafumi Tamura<sup>a</sup>

<sup>a</sup> Department of Pharmaceutical Sciences, Sanyo-Onoda City University, 1-1-1 Daigakudori,  
Sanyo-onoda, Yamaguchi 756-0884, Japan

E-mail: mtamura@rs.socu.ac.jp

## Table of contents

- I. General experimental procedures
- II. Experimental procedures
  - ▶ Reagents and Substrates
  - ▶ Synthesis of Ligands and Pd-complex
  - ▶ Additional investigations of reaction conditions
  - ▶ Additional investigations of the substrates
  - ▶ General Procedure for Pd catalyzed conjugate addition reactions
- III. References
- IV. <sup>1</sup>H NMR and <sup>13</sup>C NMR Spectra

## I. General experimental procedures

All reactions were carried out in oven (160 °C) and flame-dried modified Schlenk tubes with a glass stopper equipped with a Teflon-coated magnetic stirring bar under a positive pressure of dry argon. All work-up and purification procedures were carried out with reagent grade solvents in air.

For thin-layer chromatography (TLC) analysis, Pre-coated plates (TLC silica gel 60 F<sub>254</sub>, Art No. 5715, 0.25 mm, Merck & Co. or NH<sub>2</sub> Silica Gel 60 F<sub>254</sub> Plate-Wako, 0.25 mm, FUJIFILM Wako Pure Chemical Corporation) were used. For flash column chromatography, silica gel 60N (CHROMATOREX® PSQ100B, Fuji Silysia Chemical Ltd.), and amine-modified silica gel (Wakosil® 50 NH<sub>2</sub> (HC), FUJIFILM Wako Pure Chemical Corporation) was used.

Melting point (m.p.: °C) determinations were performed using a Yanaco MP-J3 instrument are uncorrected. Optical rotations ( $[\alpha]_D$ ) were measured on a JASCO P-2200 polarimeter.

<sup>1</sup>H- and <sup>13</sup>C-NMR were measured on a JEOL JNM-ECZ S (400 MHz), JEOL JNM-ECZ R (600 MHz) spectrometer in the solvent indicated; Chemical shifts ( $\delta$ ) are expressed in parts per million (ppm) downfield from internal standard (tetramethylsilane, 0.00 ppm, or 7.26 ppm for CDCl<sub>3</sub>), and coupling constants ( $J$ ) are reported as hertz (Hz). Splitting patterns are indicated as follows: s = singlet, d = doublet, t = triplet, m = multiplet, br = broad. Infrared (IR) spectra and Attenuated total reflectance Fourier-transform infrared (ATR/FTIR) spectra were recorded by using a JASCO FT/IR-4600 spectrometer. High resolution mass spectra (HRMS) (ESI, positive ion mode) were obtained with a JEOL AccuTOF™ LC-plus 4G mass spectrometer and JEOL YOKUDELNA ion peak  $[M+Na]^+$  ( $m/z$  430.9141952) was used as an internal standard for mass calibration. An oil bath was used as a heat source, when reactions that require heating.

## II. Experimental procedures

### ► Reagents and Substrates

Unless stated otherwise, reagents were used without further purification as received from commercial. CH<sub>2</sub>Cl<sub>2</sub> and THF solvents (anhydrous; Kanto Chemical Co., Inc.), DCE (1,2-dichloro ethane), MeOH, EtOH, *i*PrOH, 1,4-dioxane, Et<sub>2</sub>O, DMF, toluene, CCl<sub>4</sub>, CH<sub>3</sub>CN and DMA (*N*-Acetyl dimethylamine) were distilled prior to use according to the standard protocols. Deionized water was purified with a cartridge water purifier (ORGANO G-10D).

2,5-Dimethoxy-4-methyl phenylboronic acid<sup>1</sup> and 2,3-Dimethoxy-5-methyl phenylboronic acid<sup>1,2</sup> were synthesized according to the known procedures.

Other boronic acids are commercially available materials.

The substrate Methyl-3-oxocyclopent-2-ene carboxylate<sup>3</sup>, 3-Methyl-2-cyclohepten-1-one **1c**<sup>4</sup>, 4-Methylfuran-2(5H)-one **1d**<sup>5</sup>, 3-Ethyl-2-cyclopenten-1-one<sup>6</sup> from 3-Ethoxy-2-cyclopentenone and (*E*)-4-Phenylpent-3-en-2-one **4**<sup>16</sup> were synthesized according to the literature.

### ► Synthesis of Ligands and Pd-complexes

#### i. Synthesis of L1-PdCl<sub>2</sub>

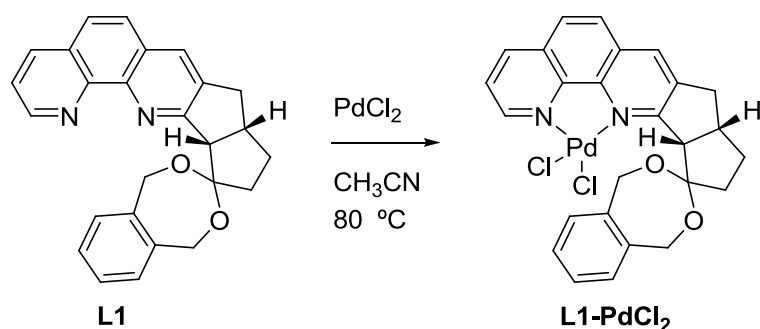

Into an oven-dried Schlenk tube equipped with a magnetic stir-bar was charged with PdCl<sub>2</sub> (58 mg, 0.327 mmol), **L1**<sup>a</sup> (129 mg, 0.327 mmol). The tube was closed with a reflux cold

finger type condenser and argon and dry CH<sub>3</sub>CN (3.0 ml) was introduced into the Schlenk via syringe. The reaction mixture was allowed to reflux for 3 h under argon. The reaction was cooled to room temperature and filtered directly through a fritted funnel. The residue was washed with cold CH<sub>3</sub>CN, and allowed to dry in air, yielding **L1-PdCl<sub>2</sub>** (160.3 mg, 86%) as an other solid.

$[\alpha]_{\text{D}}^{24} = +390.88$  (*c* 0.05, DMSO)

**<sup>1</sup>H NMR** (400 MHz, DMSO-*d*)  $\delta$  9.14 (d, *J* = 5.5 Hz, 1H), 8.83 (d, *J* = 1.3 Hz, 1H), 8.59 (s, 1H), 8.12 (s, 2H), 7.93 - 7.88 (m, 1H), 7.23 (d, *J* = 7.3 Hz, 1H), 7.16 - 7.07 (m, 2H), 6.92 (d, *J* = 7.8 Hz, 1H), 6.44 (d, *J* = 15.1 Hz, 1H), 5.80 (d, *J* = 7.8 Hz, 1H), 4.84 - 4.70 (m, 3H), 3.44 - 3.36 (m, 1H), 3.06 - 3.00 (m, 1H), 2.64 - 2.61 (m, 1H), 2.19 - 2.15 (m, 1H), 2.00 - 1.96 (m, 1H), 1.81 - 1.72 (m, 2H)

**<sup>13</sup>C NMR** (100 MHz, DMSO-*d*)  $\delta$  172.0 (C), 151.3 (CH), 147.4 (C), 146.5 (C), 145.2 (C), 140.4 (C), 139.1 (C), 138.9 (CH), 138.0 (CH), 134.4 (C), 130.2 (C), 129.9 (CH), 128.0 (CH), 127.2 (CH), 127.0 (CH), 126.9 (CH), 126.3 (CH), 125.1 (CH), 116.2 (C), 67.8 (CH<sub>2</sub>), 67.6 (CH<sub>2</sub>), 58.5 (CH), 36.4 (CH<sub>2</sub>), 35.0 (CH<sub>2</sub>), 29.0 (CH<sub>2</sub>)

**HRMS** (ESI-TOF) *m/z* Calculated for C<sub>26</sub>H<sub>22</sub>Cl<sub>2</sub>N<sub>2</sub>O<sub>2</sub>NaPd [M+Na]<sup>+</sup> : 592.9991, found: 592.9989

<sup>a</sup>**L1** was synthesized according to the literature: M. Tamura, H. Ogata, Y. Ishida, Y. Takahashi, *Tetrahedron Lett.*, 2017, **58**, 3808.



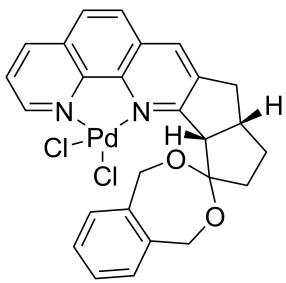

**L1-PdCl<sub>2</sub>**  
**(DMSO-d<sub>6</sub>)**

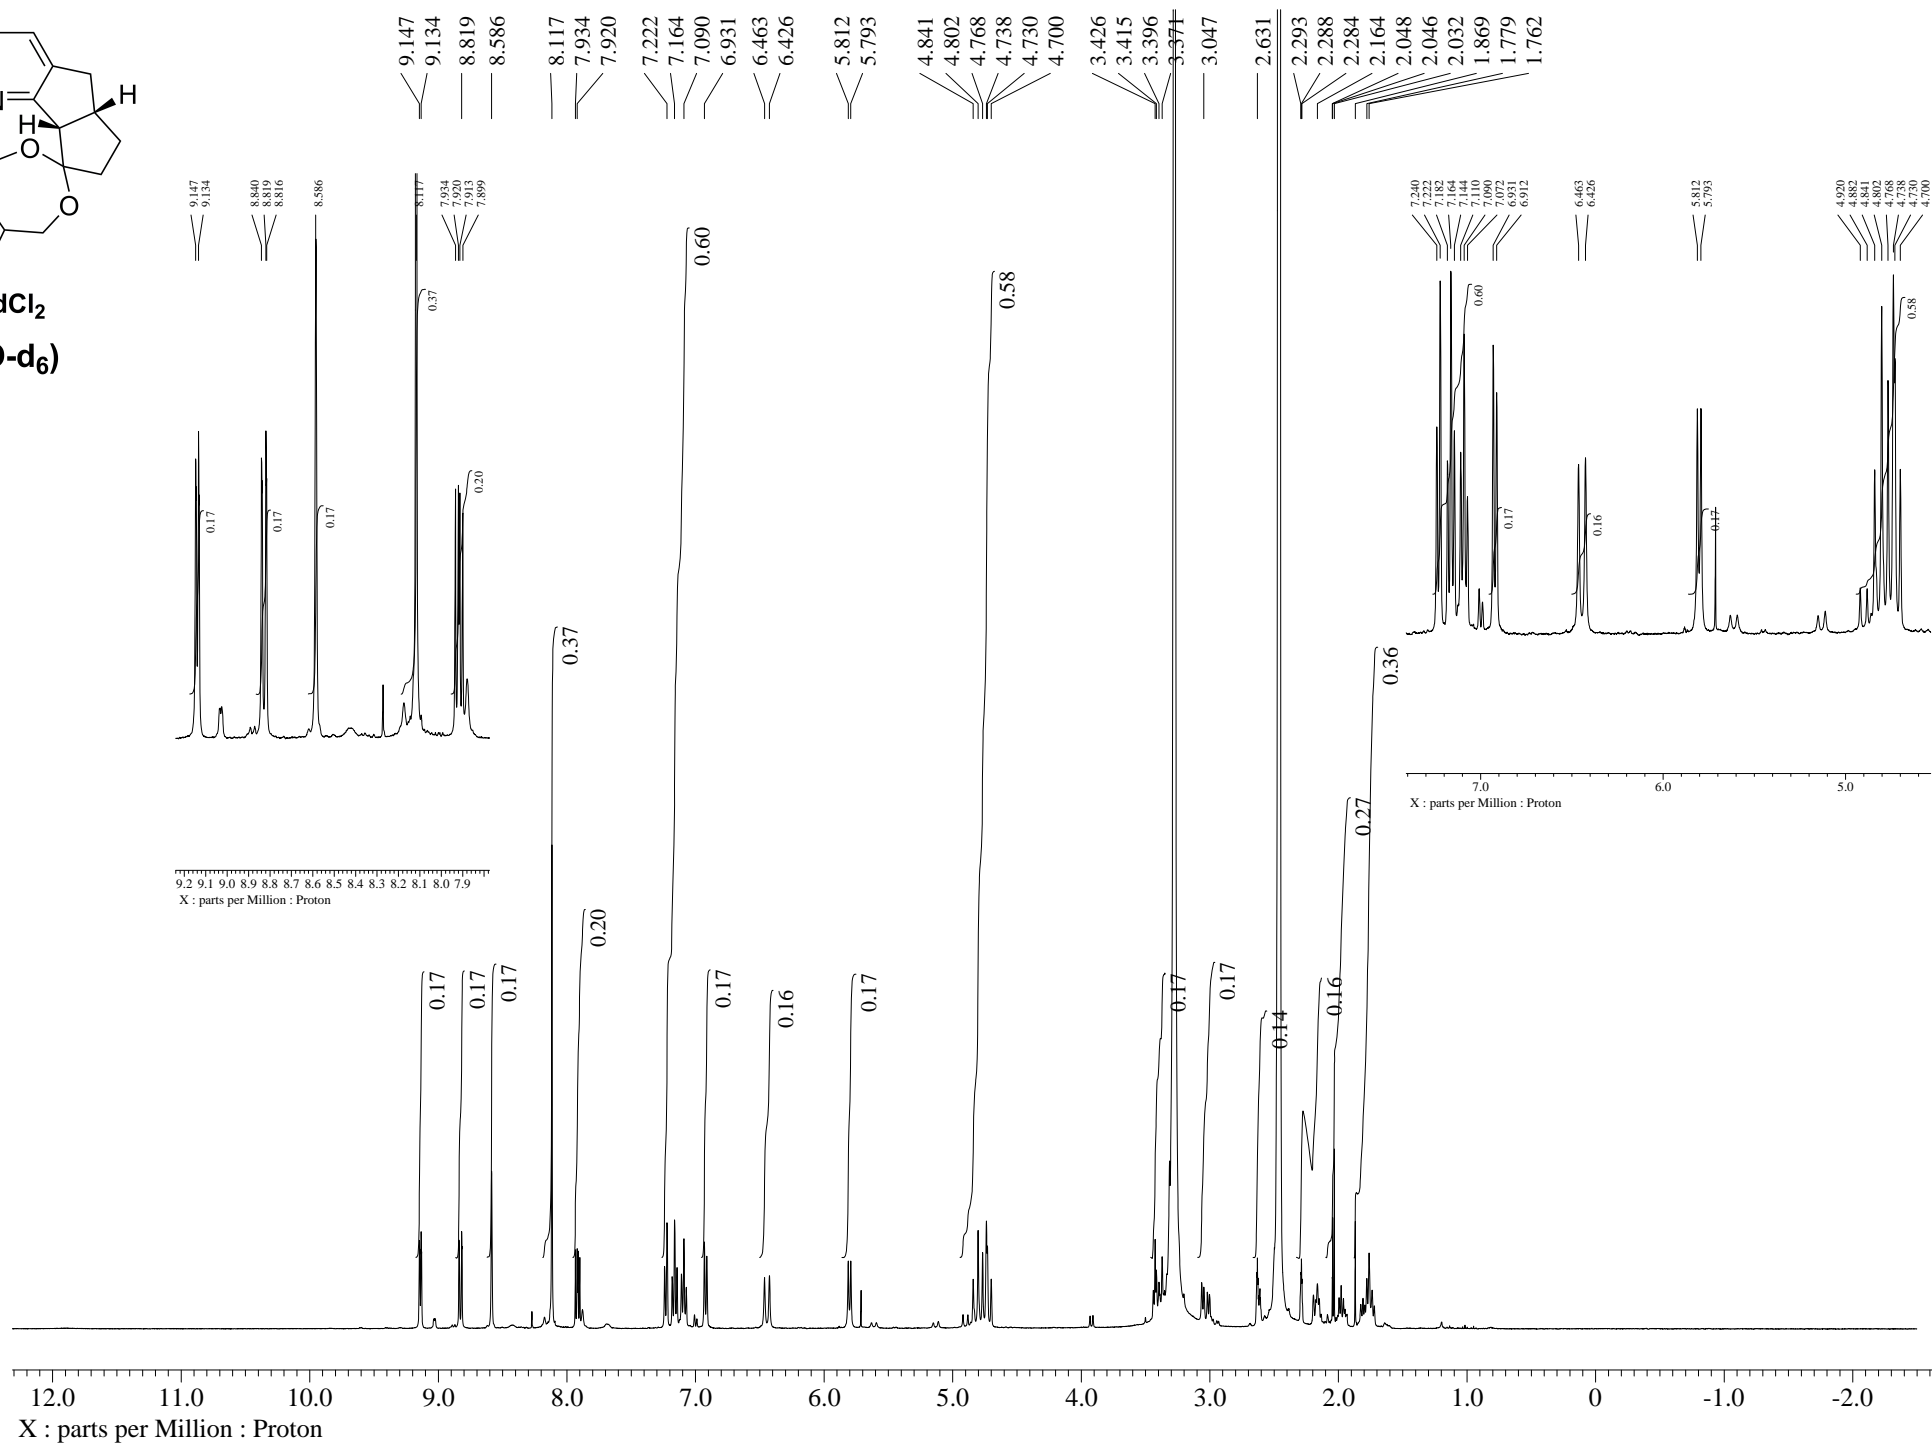

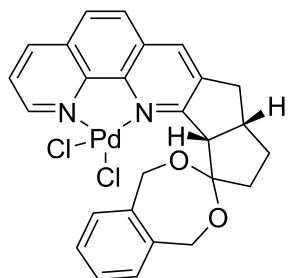

**L1-PdCl<sub>2</sub>**  
**(DMSO-d<sub>6</sub>)**

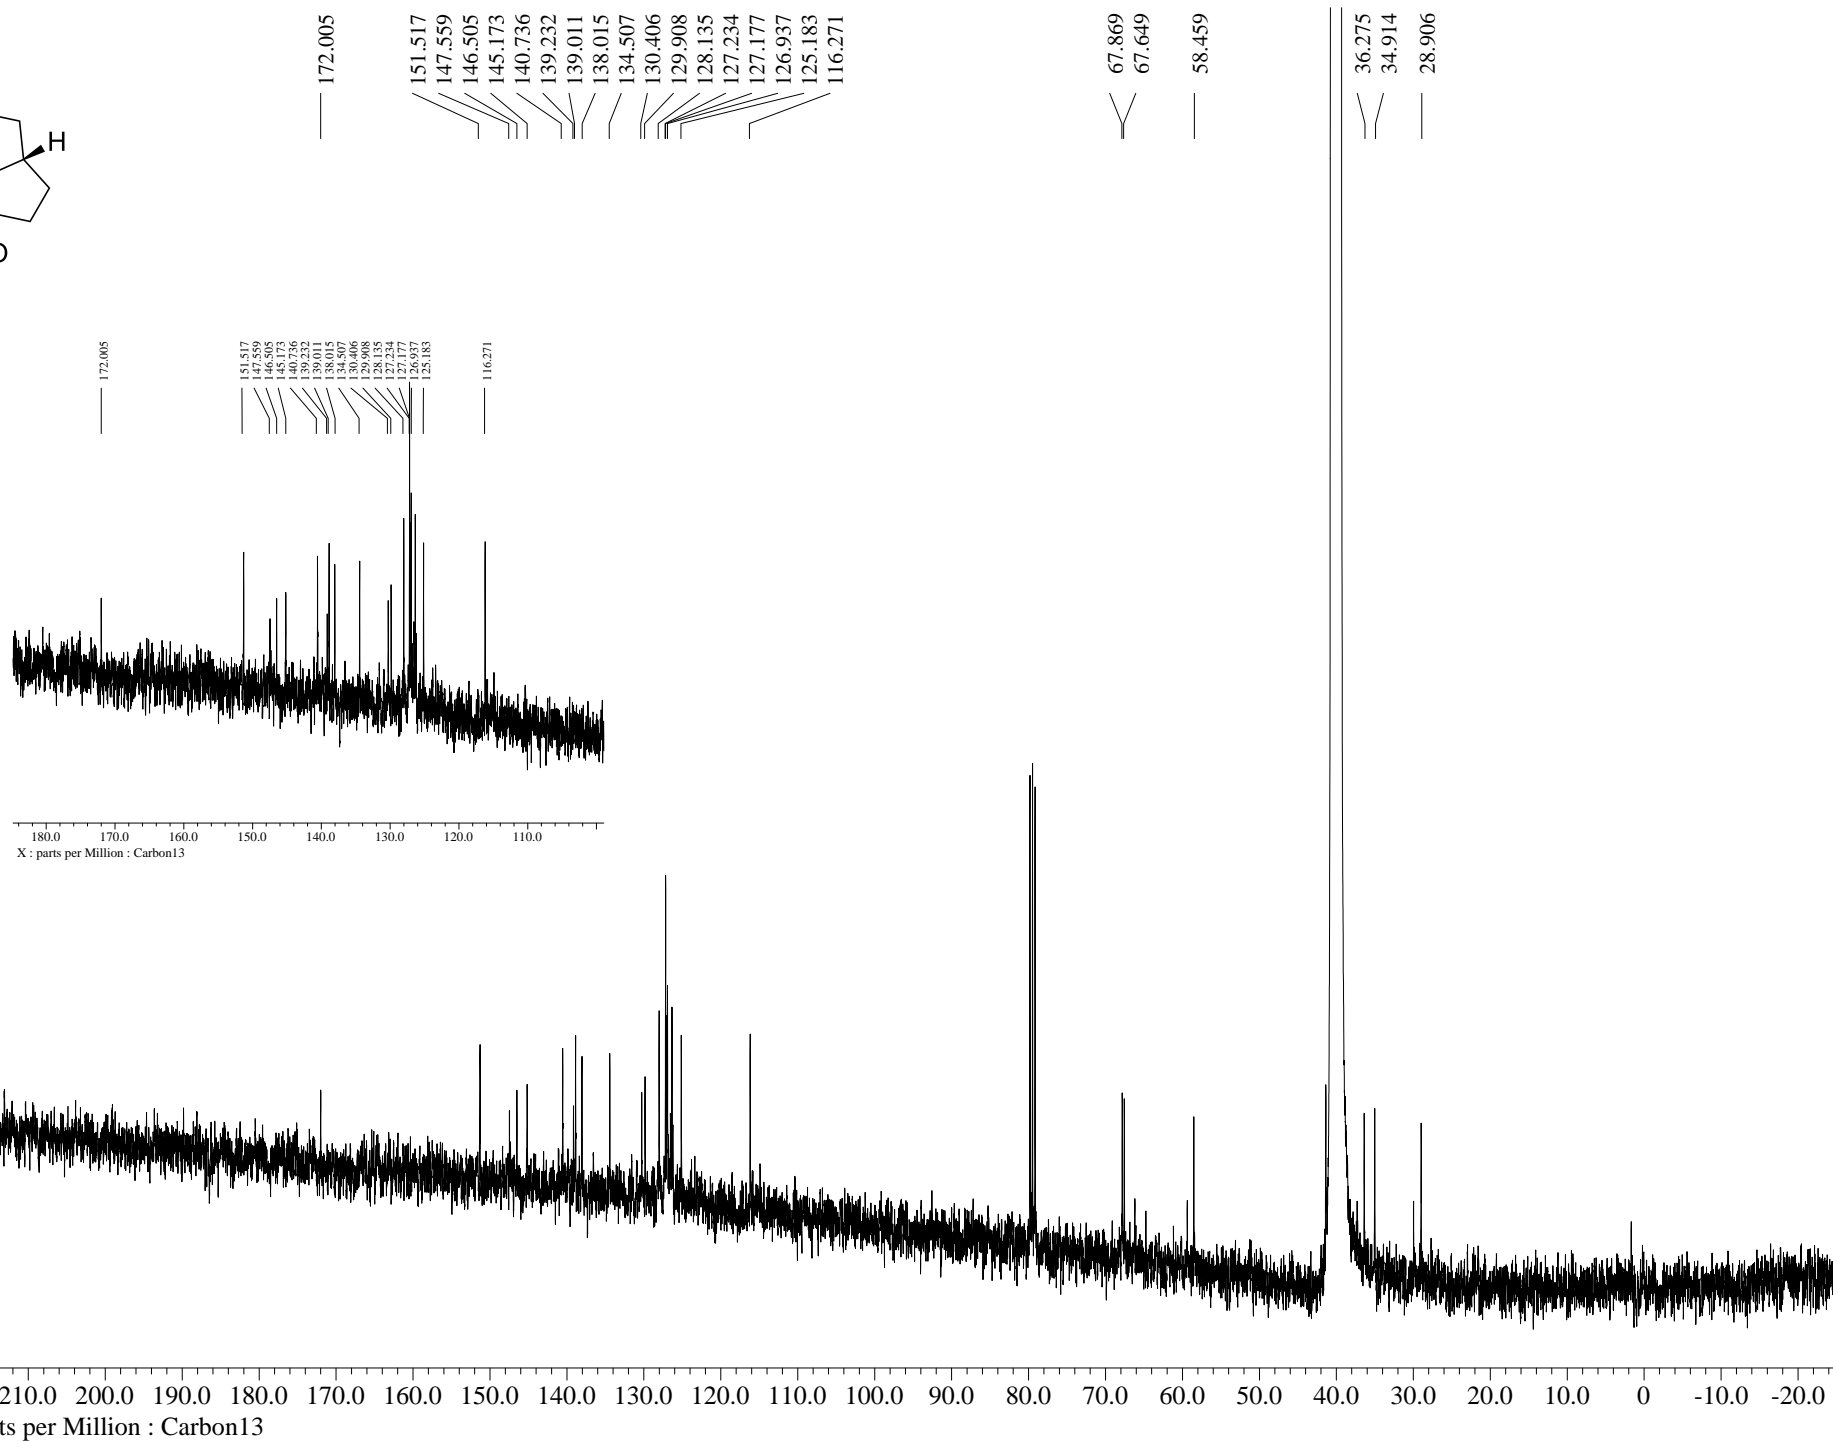

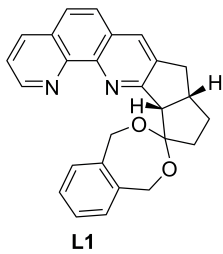

(DMSO-d<sub>6</sub>)

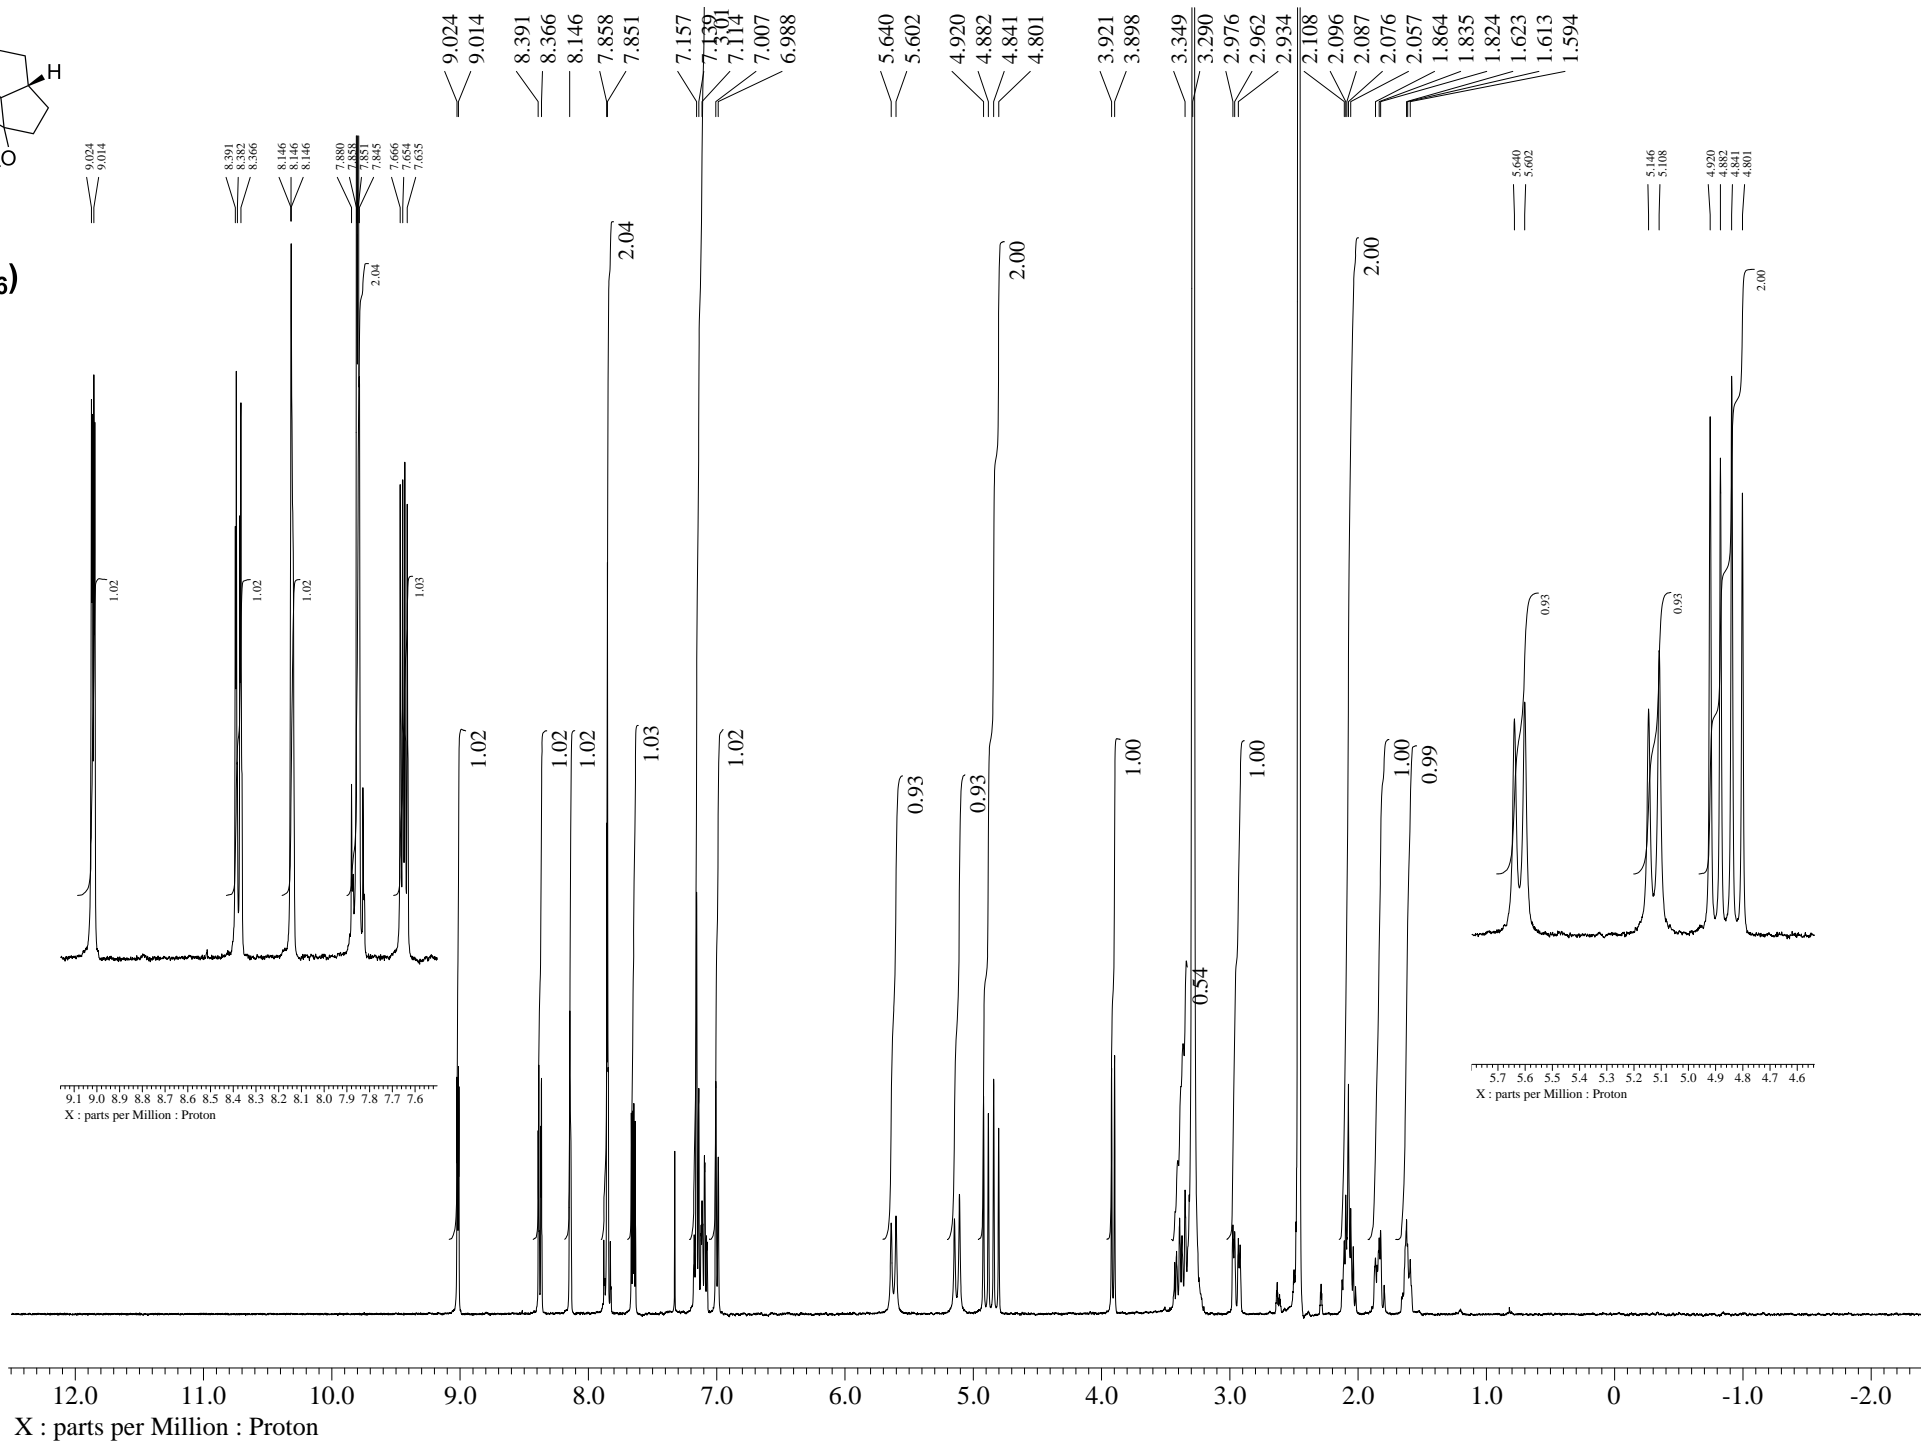

## ii. Synthesis of L2 and L2-PdCl<sub>2</sub>

### (3a*S*,6*S*,6a*R*)-6-(methoxymethoxy) hexahydropentalen-1(2*H*)-one: **S3**

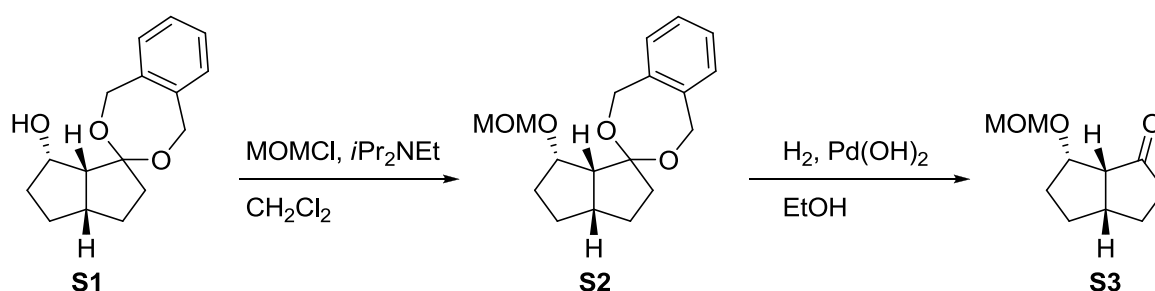

To a stirred solution of **S1**<sup>a</sup> (1.2 g, 4.62 mmol) in dry CH<sub>2</sub>Cl<sub>2</sub> (30 ml) were added *i*Pr<sub>2</sub>NEt (5.0 ml, 28.7 mmol) and MOMCl (1.85 g, 23 mmol) at 0 °C, and the reaction mixture was stirred at room temperature for 24 h. The reaction mixture was then diluted with AcOEt and poured into water (50 ml) and extracted with AcOEt. The extract was washed with water, brine and dried over Na<sub>2</sub>SO<sub>4</sub> and concentrated *in vacuo* to give a crude product. The crude product was purified by silica gel column chromatography (silica gel, 20: 1 hexane/AcOEt) to afford the **S2** (1.26 g, 90%); colorless oil.

<sup>1</sup>H NMR (400 MHz, Chloroform-*d*) δ 7.19 - 7.15 (m, 2H), 7.10 - 7.04 (m, 2H), 5.00 (d, *J* = 14.6 Hz, 1H), 4.86 (dd, *J* = 5.5, 9.6 Hz, 2H), 4.76 (d, *J* = 14.6 Hz, 1H), 4.69 (dd, *J* = 3.7, 6.9 Hz, 2H), 4.17 - 4.15 (m, 1H), 3.41 (s, 3H), 2.69 - 2.50 (m, 2H), 2.19 - 1.88 (m, 5H), 1.62 - 1.41 (m, 4H)

To a solution of **S2** (1.0 g, 3.29 mmol) in EtOH (20 ml) was added Pd(OH)<sub>2</sub> (15 mg) and mixture was stirred under H<sub>2</sub> at room temperature. After stirring for 28 h, the catalyst was filtered off over Celite pad and filtrate was concentrated *in vacuo* to give a crude product. The crude residue was purified by column chromatography (silica gel, 10: 1 hexane/AcOEt) to afford the **S3** (593 mg, 98%) as colorless oil.

[α]<sub>D</sub><sup>23</sup> = -40.02 (*c* 0.66, CHCl<sub>3</sub>)

<sup>1</sup>H NMR (400 MHz, Chloroform-*d*) δ 4.58 (q, *J* = 6.86 Hz, 2H), 4.41 - 4.38 (m, 1H), 3.32 (s, 3H), 2.84 - 2.71 (m, 2H), 2.43 - 2.32 (m, 1H), 2.23 - 1.91 (m, 4H), 1.82 - 1.63 (m, 3H)

**<sup>13</sup>C NMR** (100 MHz, Chloroform-*d*)  $\delta$  218.7 (C), 95.4 (CH<sub>2</sub>), 79.7 (CH), 56.5 (CH), 55.4 (CH), 40.7 (CH<sub>3</sub>), 40.2 (CH<sub>2</sub>), 34.4 (CH<sub>2</sub>), 31.3 (CH<sub>2</sub>), 27.9 (CH<sub>2</sub>)

**HRMS** (ESI-TOF) *m/z* Calculated for C<sub>10</sub>H<sub>16</sub>O<sub>3</sub>Na [M+Na]<sup>+</sup> : 207.0997, found: 207.0994

<sup>a</sup>**S1** was synthesized according to the literature: M. Tamura, M. Oyamada, Y. Shirat, *Chirality.*, 2015, **27**, 364.

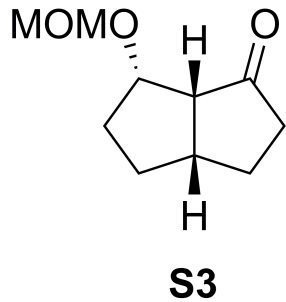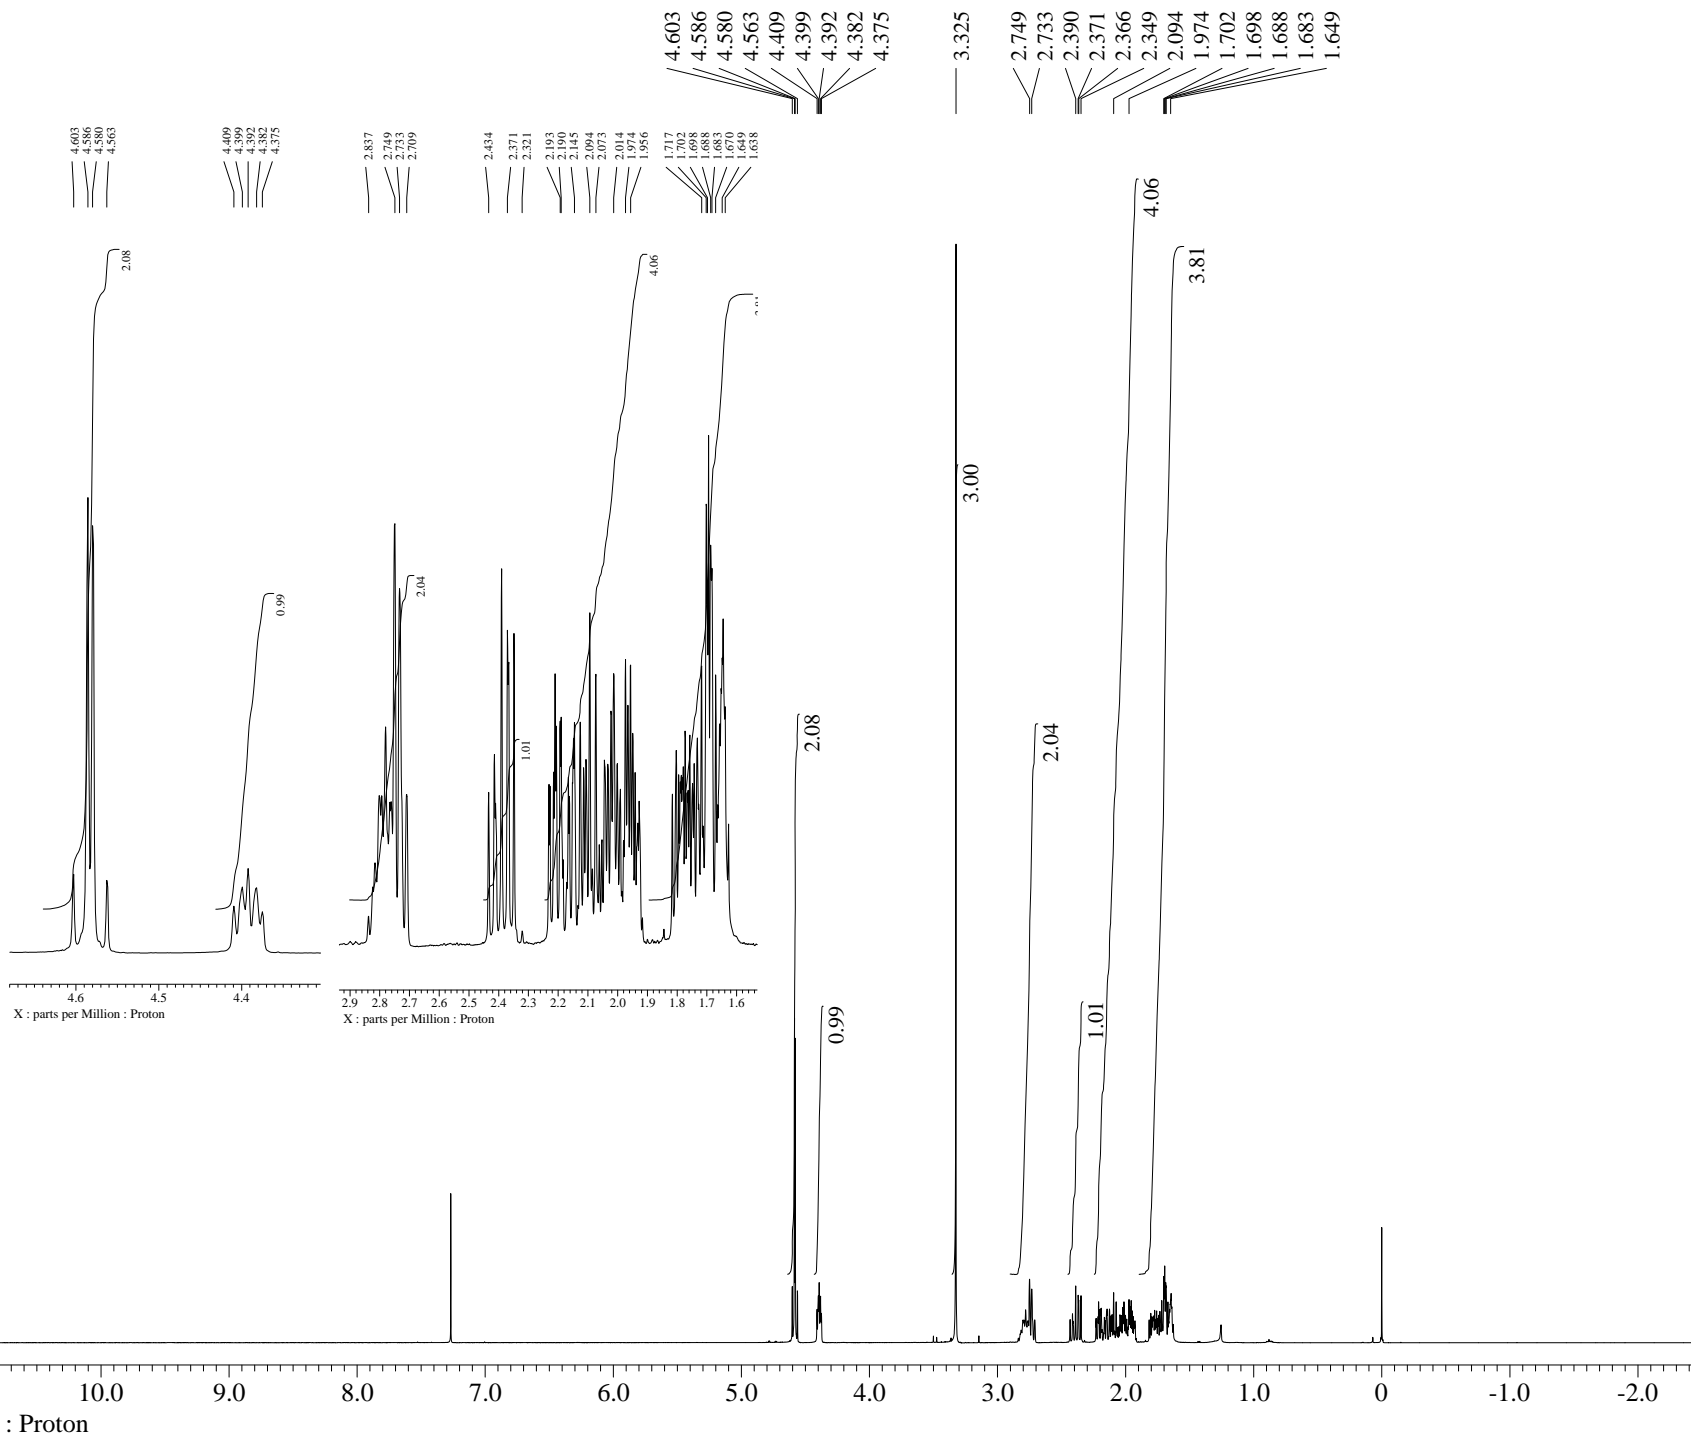

218.684

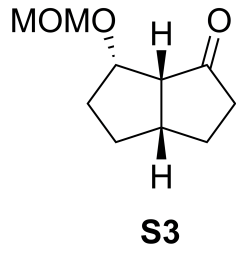

95.423

79.697  
77.346  
77.121  
76.915

56.487  
55.396

40.747  
40.172  
34.442  
31.272  
27.892

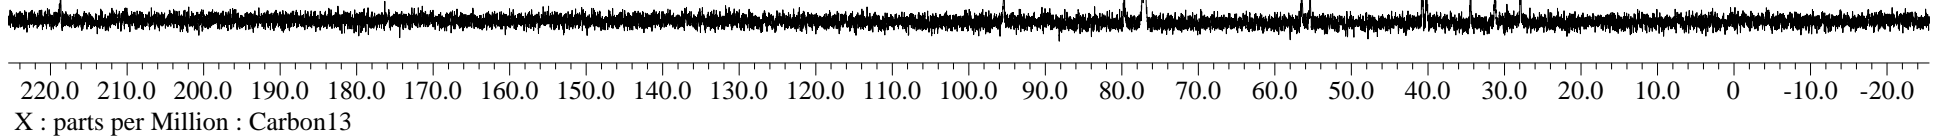

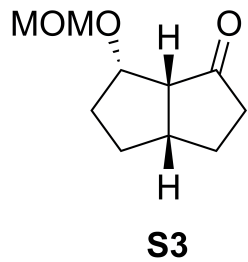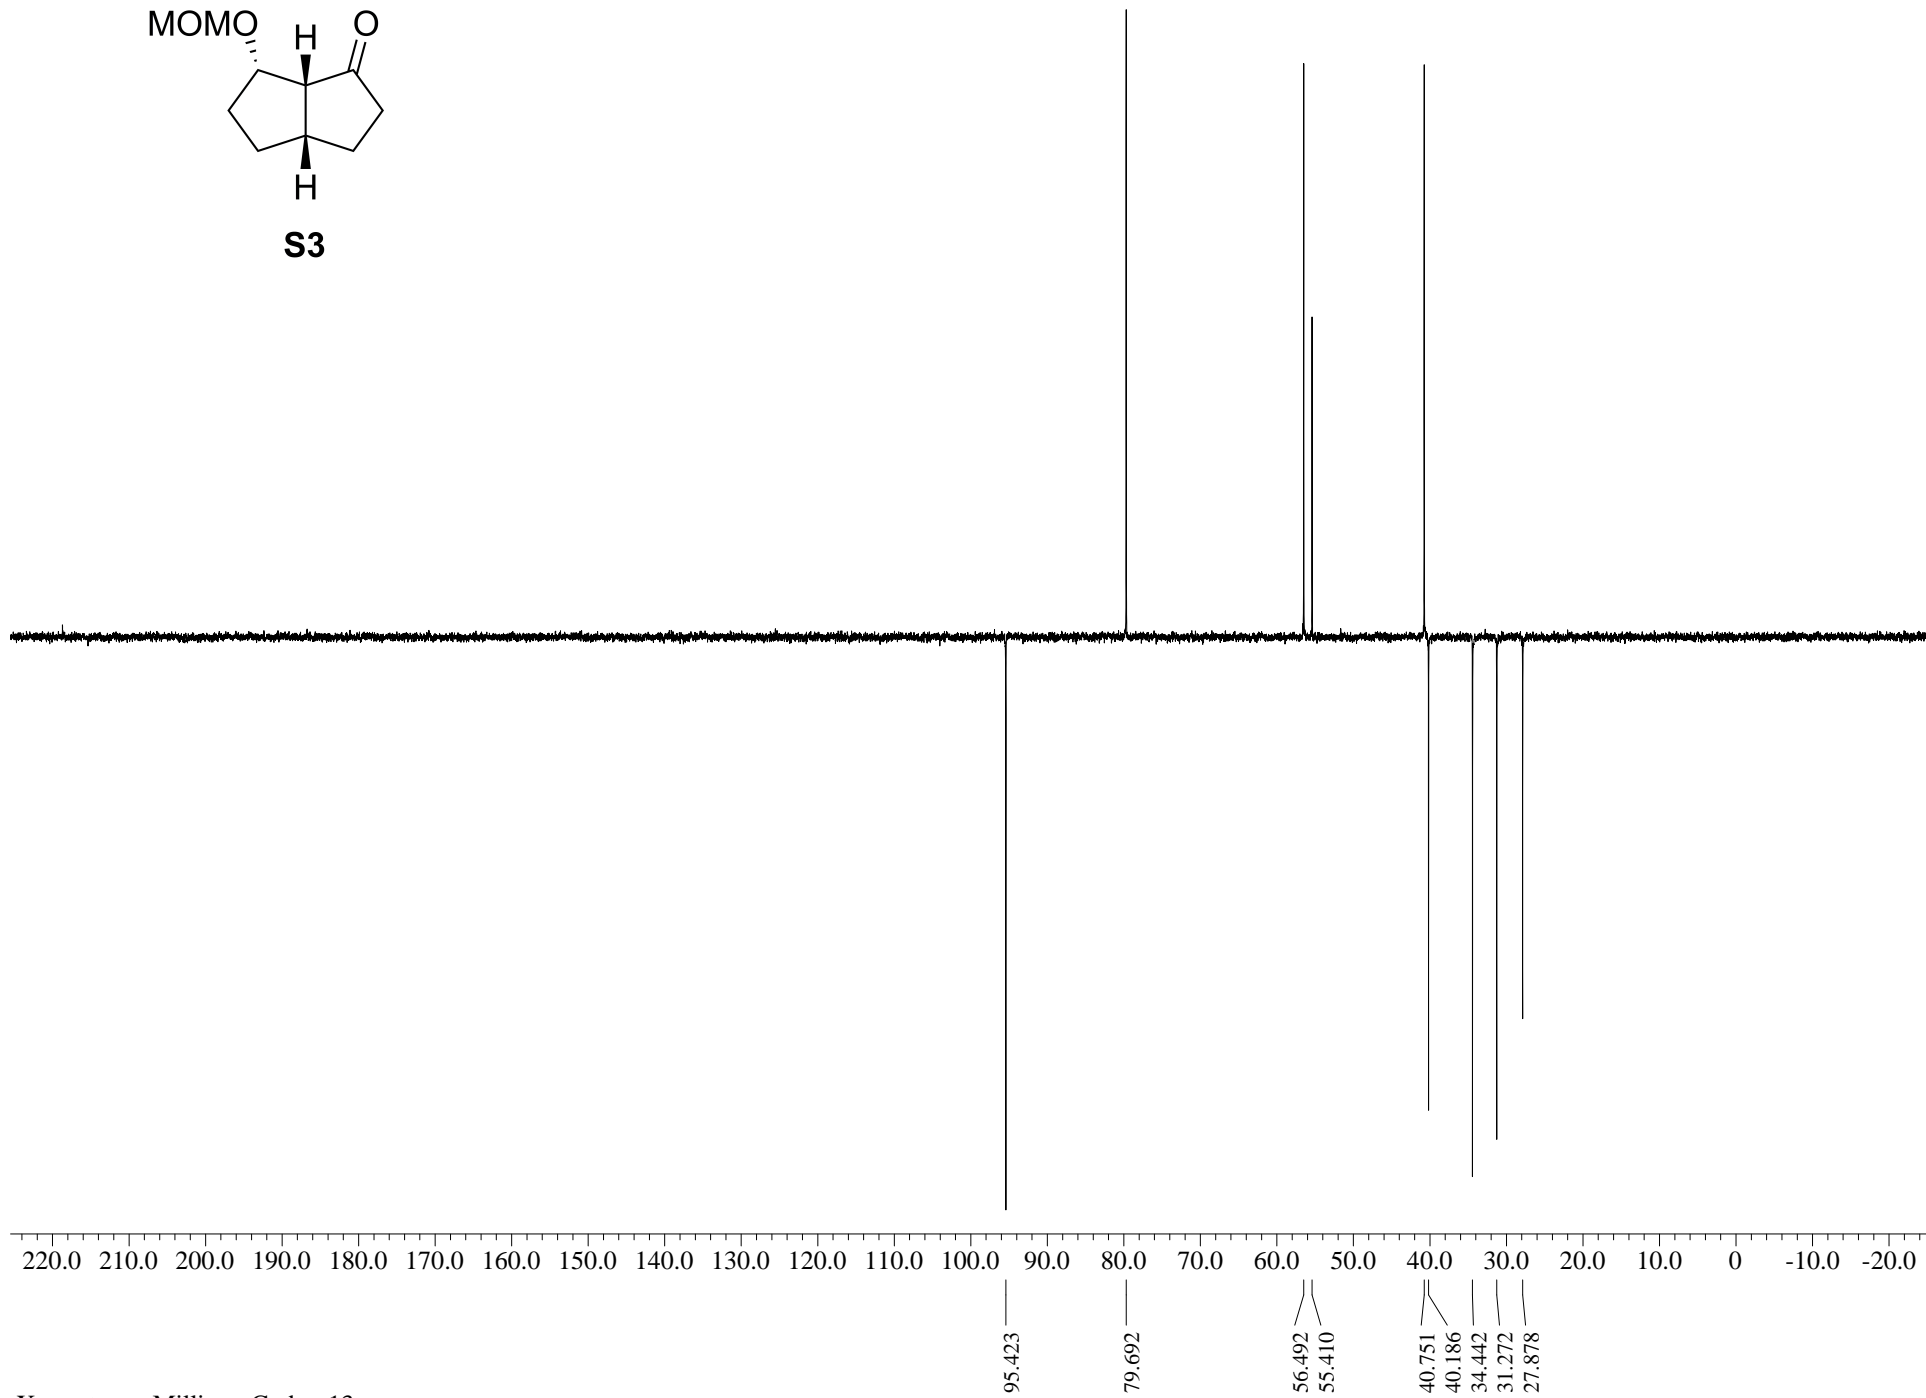

X : parts per Million : Carbon13



**(8a*S*,11*S*,11a*S*)-11-(methoxymethoxy)-8,8a,9,10,11,11a-hexahydropentaleno[1,2-  
b][1,10]phenanthroline: **L2****

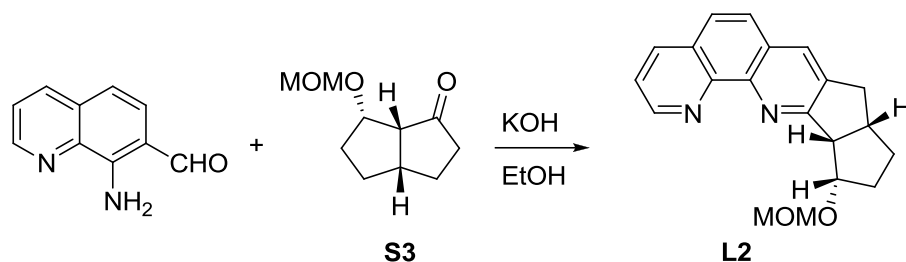

Into the round bottom flask, equipped with magnetic stir-bar under argon atmosphere was introduced a 8-Aminoquinoline-7-carbaldehyde (93.5 mg, 0.55 mmol), **S3** (100 mg, 0.55 mmol), and saturated ethanolic KOH (306 mg) in dry EtOH (10 ml), and the suspension was 80 °C for 24 h. The crude mixture was cooled to room temperature, the mixture extracted CH<sub>2</sub>Cl<sub>2</sub> and washed with water and brine and dried over Na<sub>2</sub>SO<sub>4</sub> and concentrated *in vacuo* to give a crude product. The crude product was purified by silica gel column chromatography (silica gel, 20: 1 CH<sub>2</sub>Cl<sub>2</sub>/AcOEt, followed by amine-modified silica gel, 1: 3 hexane/AcOEt) to afford the **L2** (97 mg, 55%); brown oil.

$[\alpha]_D^{24} = +351.68$  (c 0.25, CHCl<sub>3</sub>)

**<sup>1</sup>H NMR** (400 MHz, Chloroform-*d*)  $\delta$  9.16 (dd,  $J = 1.1, 3.9$  Hz, 1H), 8.18 (d,  $J = 8.3$  Hz 1H), 7.89 (s, 1H), 7.68 (dd,  $J = 7.3, 8.7$  Hz, 2H), 7.54 (dd,  $J = 4.1, 7.8$  Hz, 1H), 4.79 - 4.77 (m, 1H), 4.59 (d,  $J = 6.4$  Hz, 1H), 4.28 (d,  $J = 6.4$  Hz, 1H), 4.13 - 4.09 (m, 1H), 3.44 - 3.38 (m, 1H), 3.22 - 3.12 (m, 1H), 3.09 (s, 3H), 3.02 - 2.96 (m, 1H), 2.26 - 2.02 (m, 2H), 1.91 - 1.75 (m, 2H)

**<sup>13</sup>C NMR** (100 MHz, Chloroform-*d*)  $\delta$  166.0 (C), 149.9 (CH), 146.5 (C), 145.5 (C), 139.6 (C), 135.8 (CH), 130.6 (CH), 128.3 (C), 128.0 (C), 126.9 (CH), 125.2 (CH), 122.3 (CH), 95.6 (CH<sub>2</sub>), 80.8 (CH), 57.4 (CH), 55.2 (CH), 40.7 (CH<sub>3</sub>), 38.6 (CH<sub>2</sub>), 35.0 (CH<sub>2</sub>), 31.8 (CH<sub>2</sub>)

**HRMS** (ESI-TOF)  $m/z$  Calculated for C<sub>20</sub>H<sub>20</sub>N<sub>2</sub>O<sub>2</sub>Na [M+Na]<sup>+</sup> : 343.1422, found: 343.1428

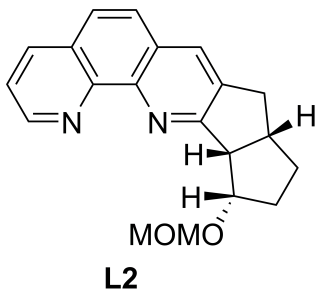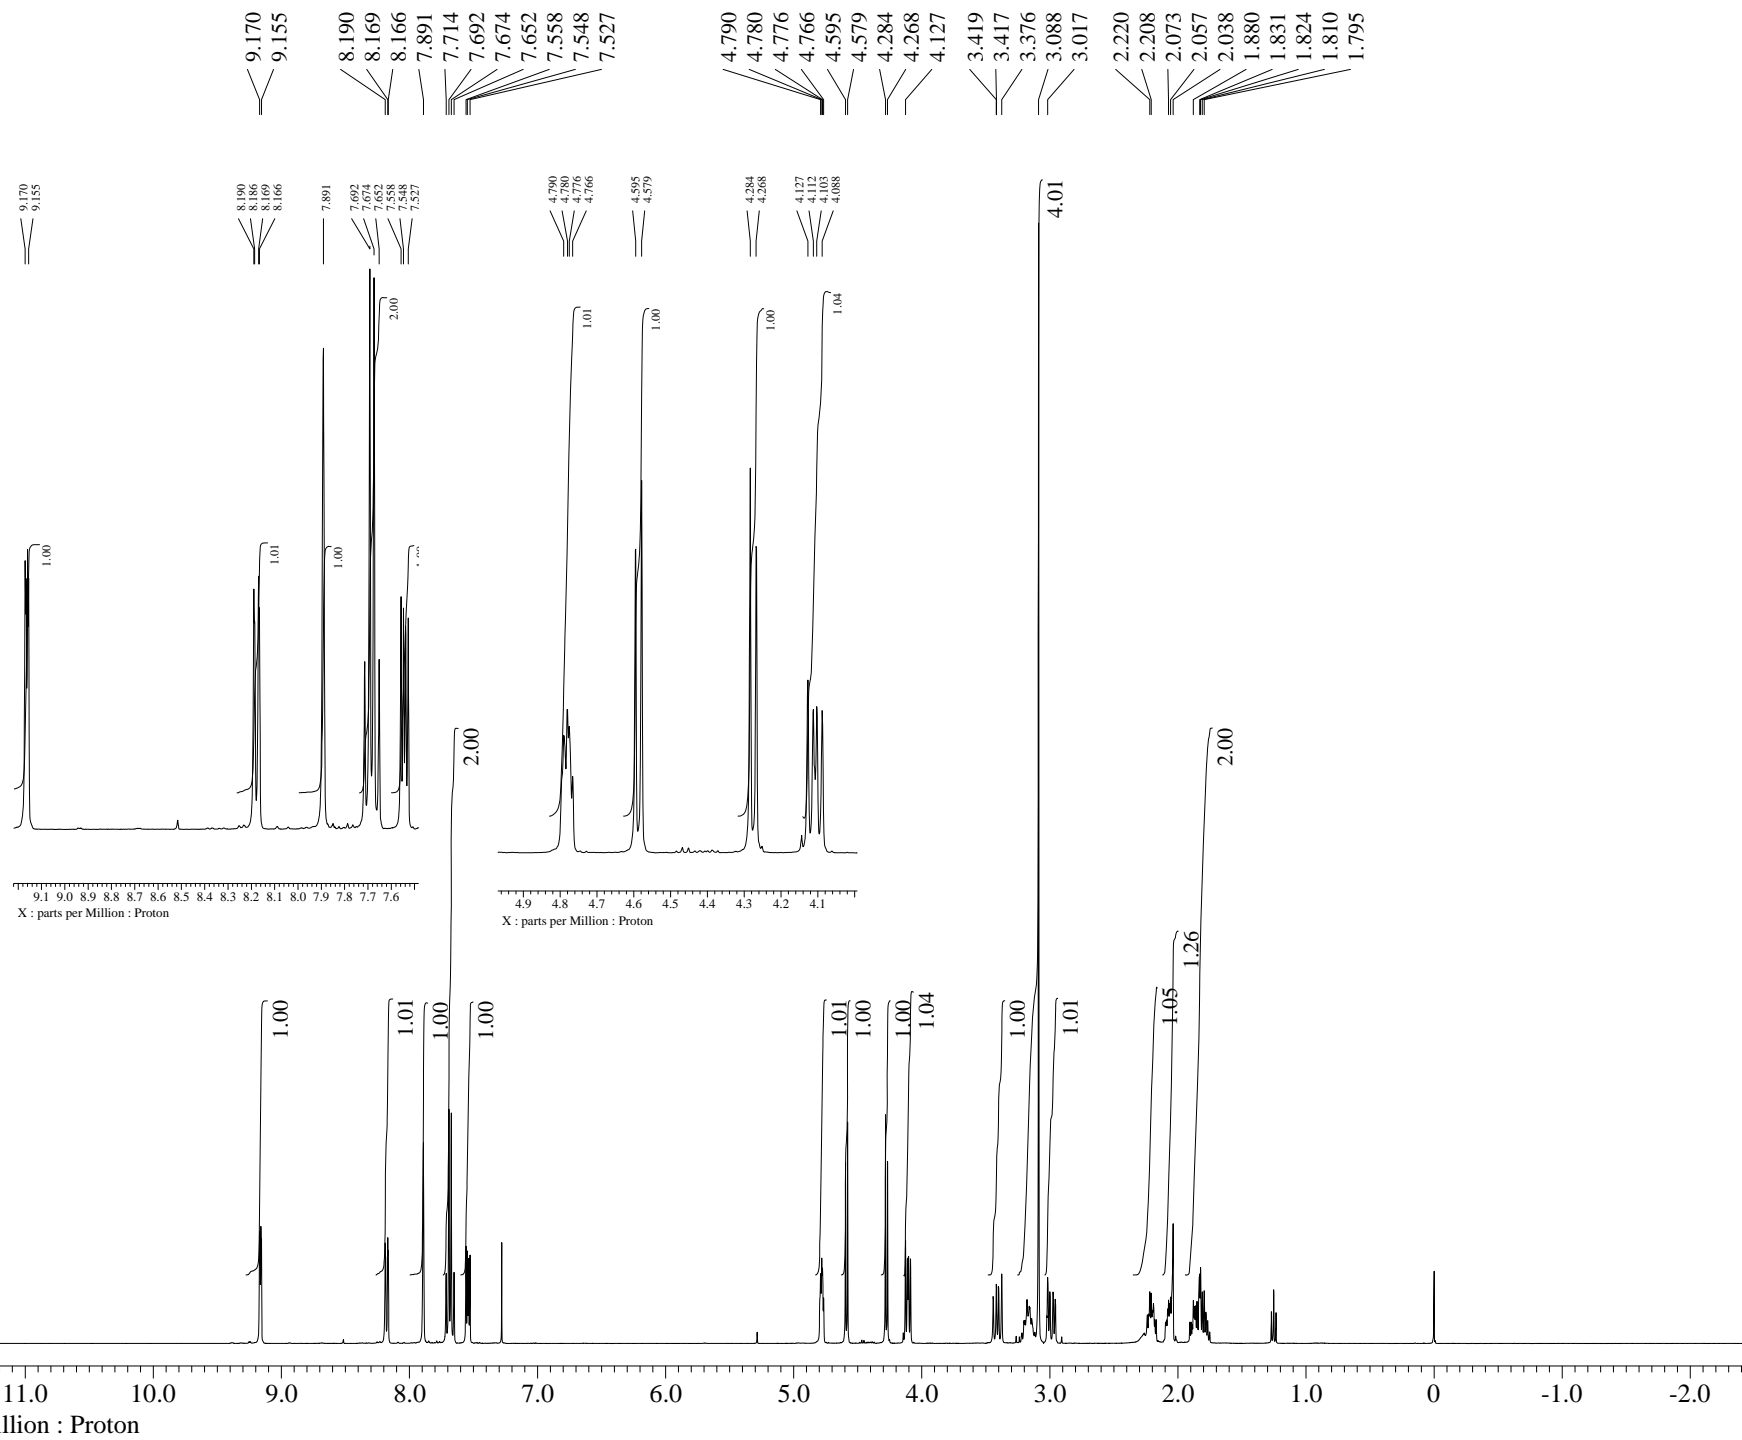

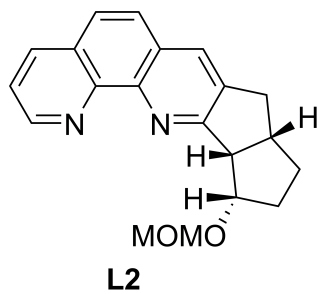

- 165.953
- 149.945
- 146.476
- 145.489
- 139.639
- 135.792
- 130.646
- 128.259
- 127.953
- 126.899
- 125.246
- 122.318
- 95.640
- 80.777
- 77.481
- 77.375
- 77.164
- 76.848
- 57.352
- 55.162
- 40.683
- 38.632
- 35.043
- 31.781

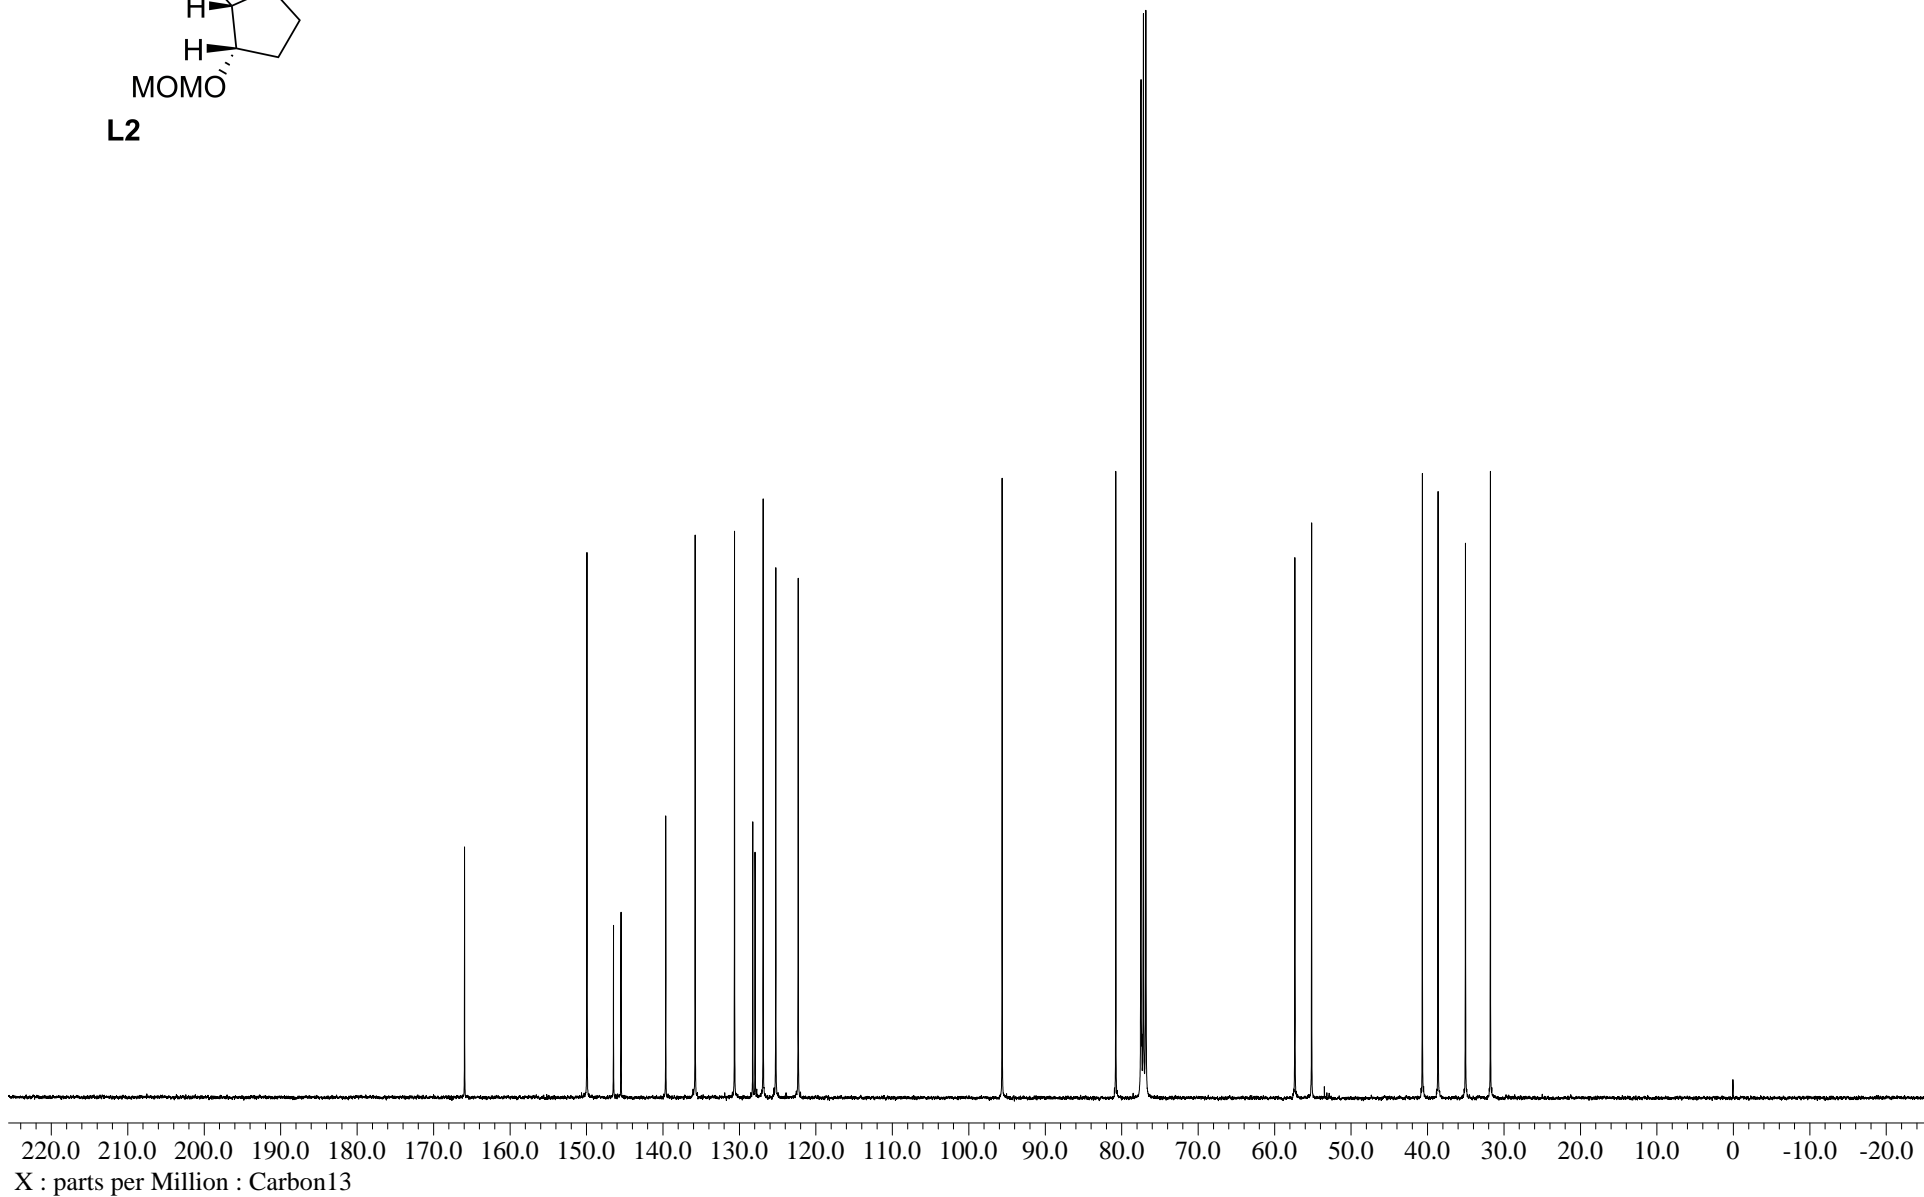

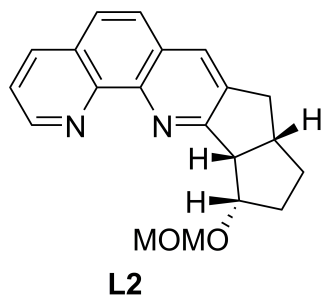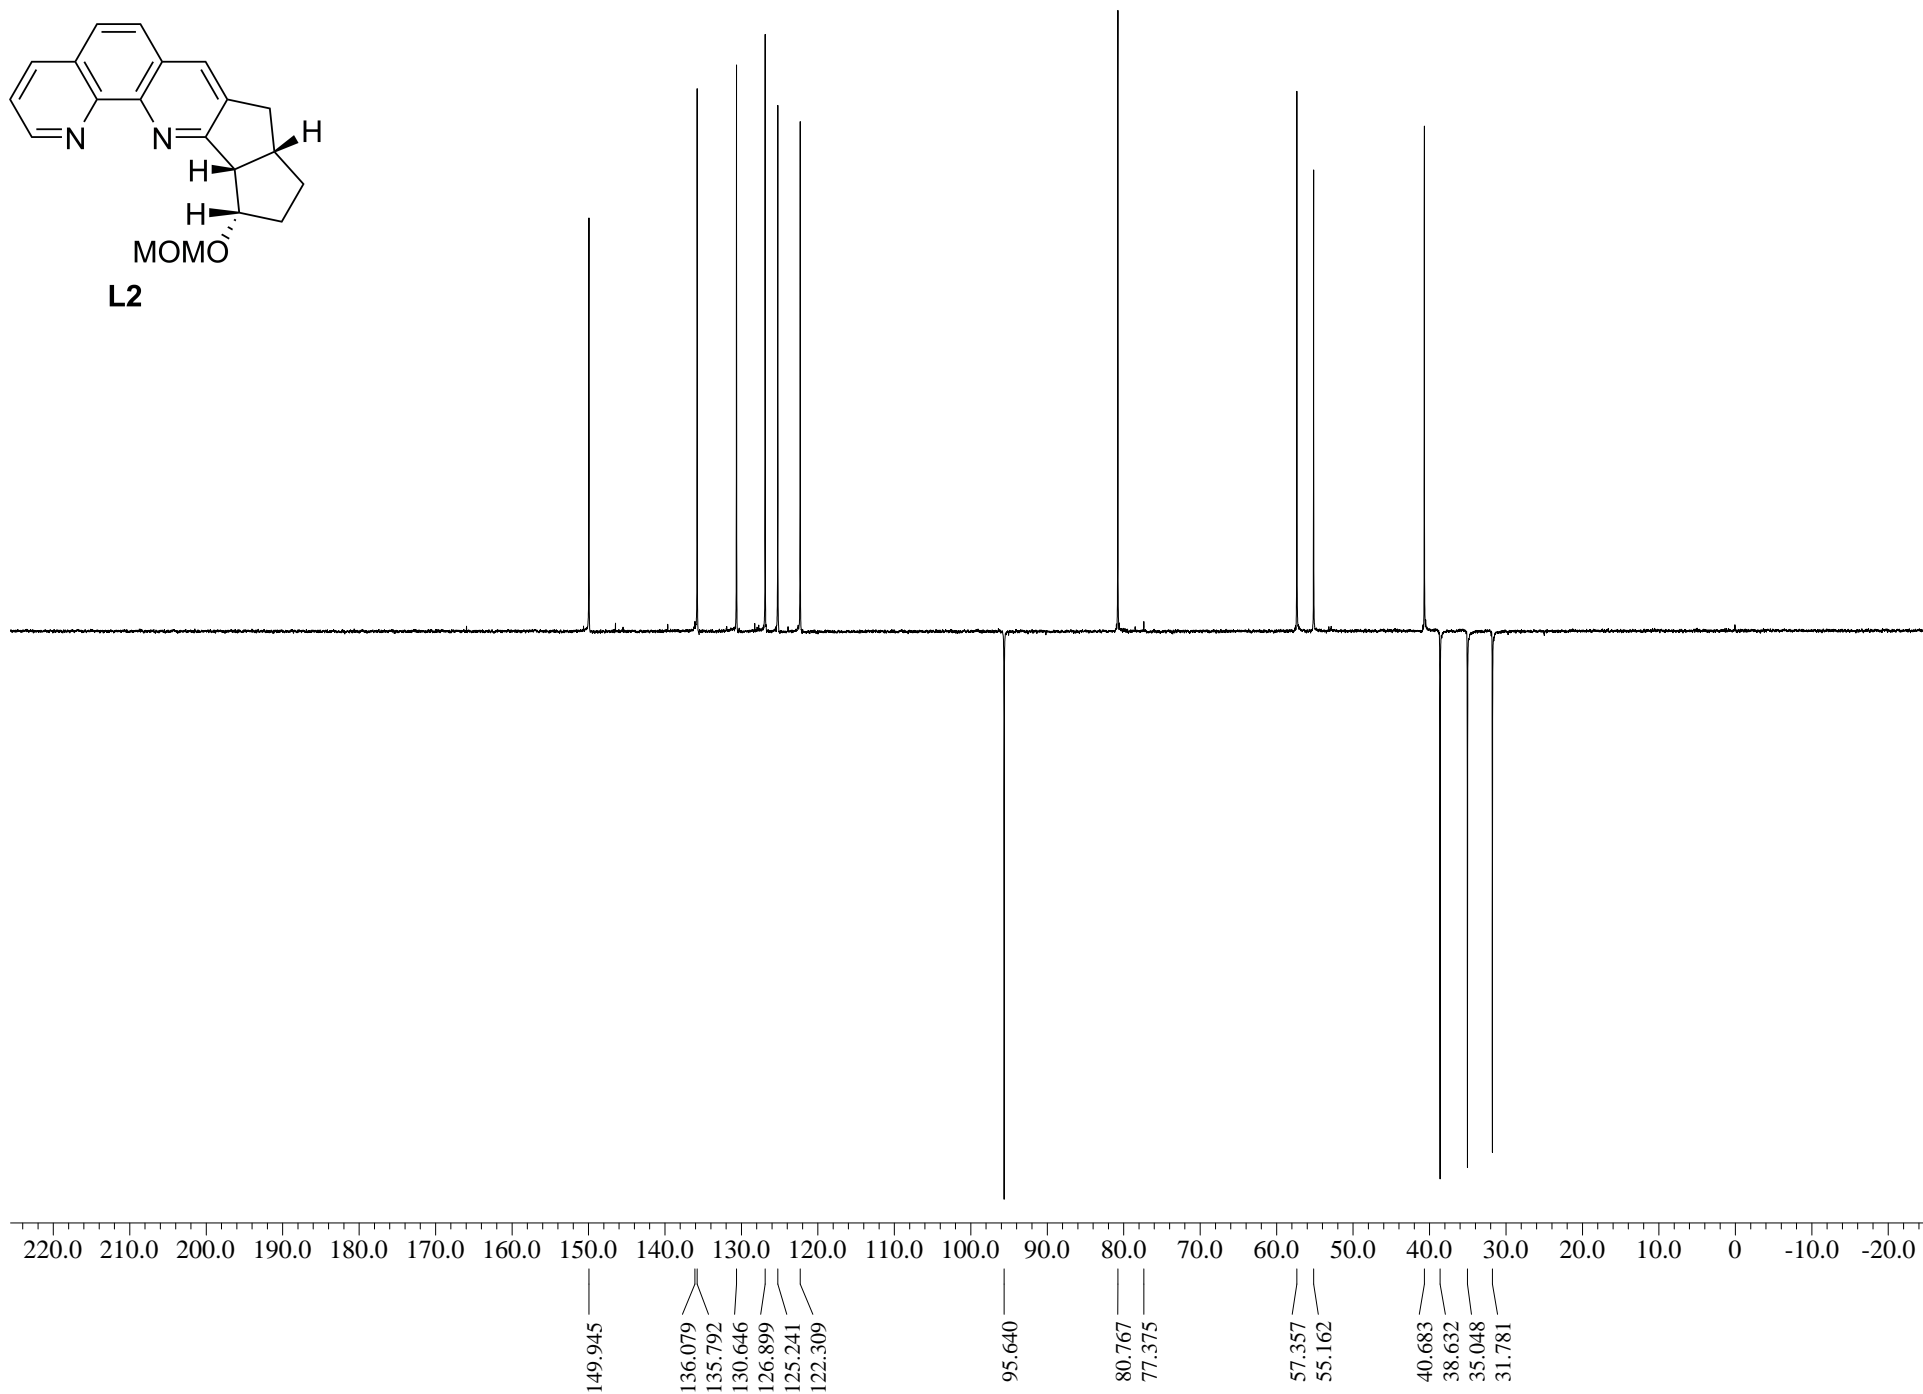

X : parts per Million : Carbon13

## L2-PdCl<sub>2</sub>

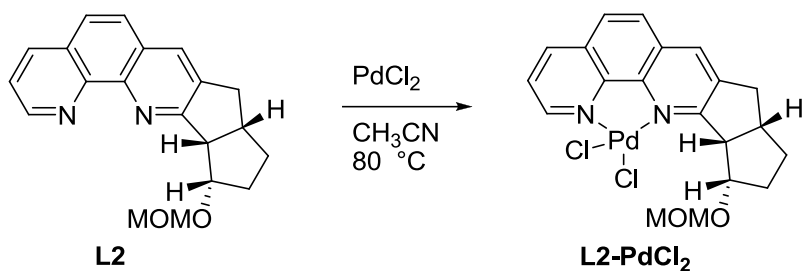

Into an oven-dried Schlenk tube equipped with a magnetic stir-bar was charged with PdCl<sub>2</sub> (27.1 mg, 0.125 mmol), **L2** (40 mg, 0.125 mmol). The tube was closed with a reflux cold finger type condenser and argon and dry CH<sub>3</sub>CN (1.0 ml) was introduced into the Schlenk tube via syringe. The reaction mixture was allowed to reflux for 3 h under argon. The reaction was cooled to room temperature and filtered directly through a fritted funnel. The residue was washed with cold CH<sub>3</sub>CN, and allowed to dry in air, yielding the first crop of **L2-PdCl<sub>2</sub>** (56 mg, 90%) as an orange-red solid.

$[\alpha]_{\text{D}}^{24} = +431.12$  (c 0.31, CHCl<sub>3</sub>)

**<sup>1</sup>H NMR** (400 MHz, Chloroform-*d*)  $\delta$  9.70 - 9.68 (m, 1H), 8.49 - 8.46 (m, 1H), 8.19 (d, *J* = 18.3 Hz, 1H), 7.89 - 7.84 (m, 2H), 7.75 - 7.72 (m, 1H), 5.66 - 5.63 (m, 1H), 5.02 - 5.00 (m, 1H), 4.85 - 4.84 (m, 1H), 4.55 (d, *J* = 7.6 Hz, 1H), 3.55 - 3.37 (m, 2H), 3.22 - 3.06 (m, 2H), 3.16 (s, 3H), 3.00 - 2.94 (m, 1H), 2.14 - 1.87 (m, 4H), 1.76 - 1.69 (m, 1H)

**<sup>13</sup>C NMR** (100 MHz, Chloroform-*d*)  $\delta$  173.3 (C), 151.1 (CH), 146.2 (CH), 138.7 (C), 133.2 (CH), 133.0 (C), 129.6 (C), 129.6 (C), 127.8 (CH), 126.2 (CH), 126.0 (CH), 123.8 (C), 97.1 (CH<sub>2</sub>), 84.0 (CH), 78.3 (C), 56.3 (CH), 55.7 (CH), 40.4 (CH<sub>3</sub>), 38.2 (CH<sub>2</sub>), 38.0 (C), 34.2 (CH<sub>2</sub>), 32.4 (C), 31.3 (CH<sub>2</sub>), 30.0 (C)

**HRMS** (ESI-TOF) *m/z* Calculated for C<sub>20</sub>H<sub>20</sub>Cl<sub>2</sub>N<sub>2</sub>O<sub>2</sub>PdNa [M+Na]<sup>+</sup>: 518.9834,

found: 518.9854

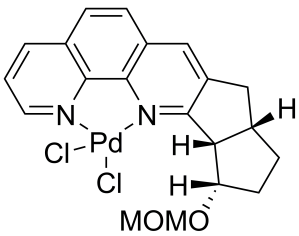

L2-PdCl<sub>2</sub>

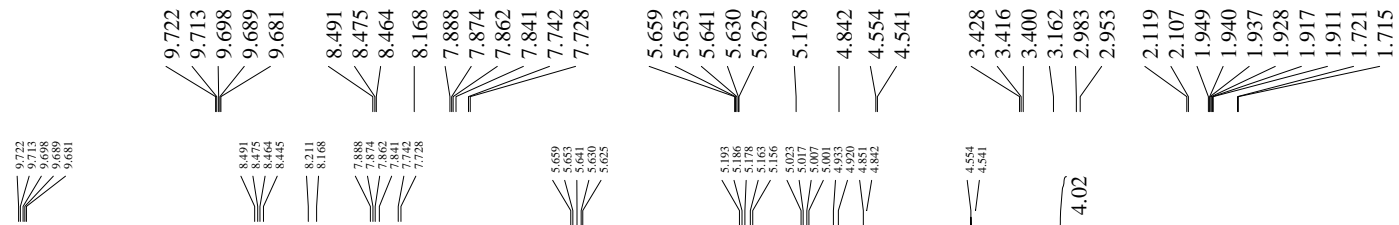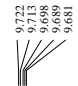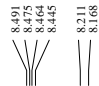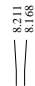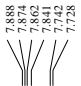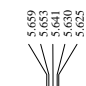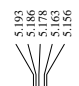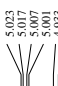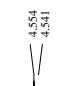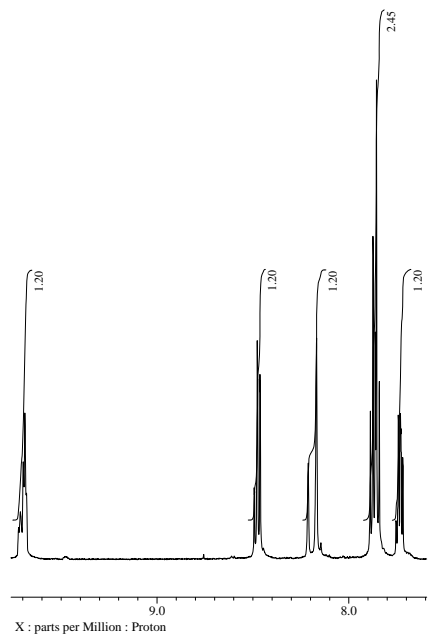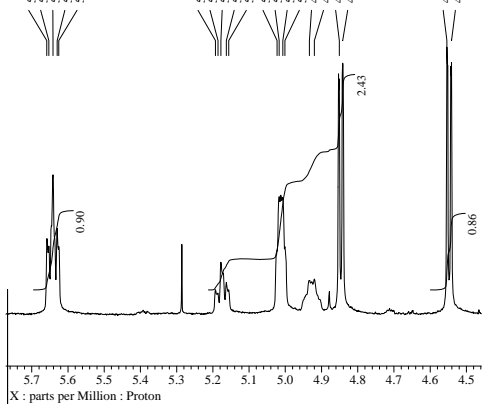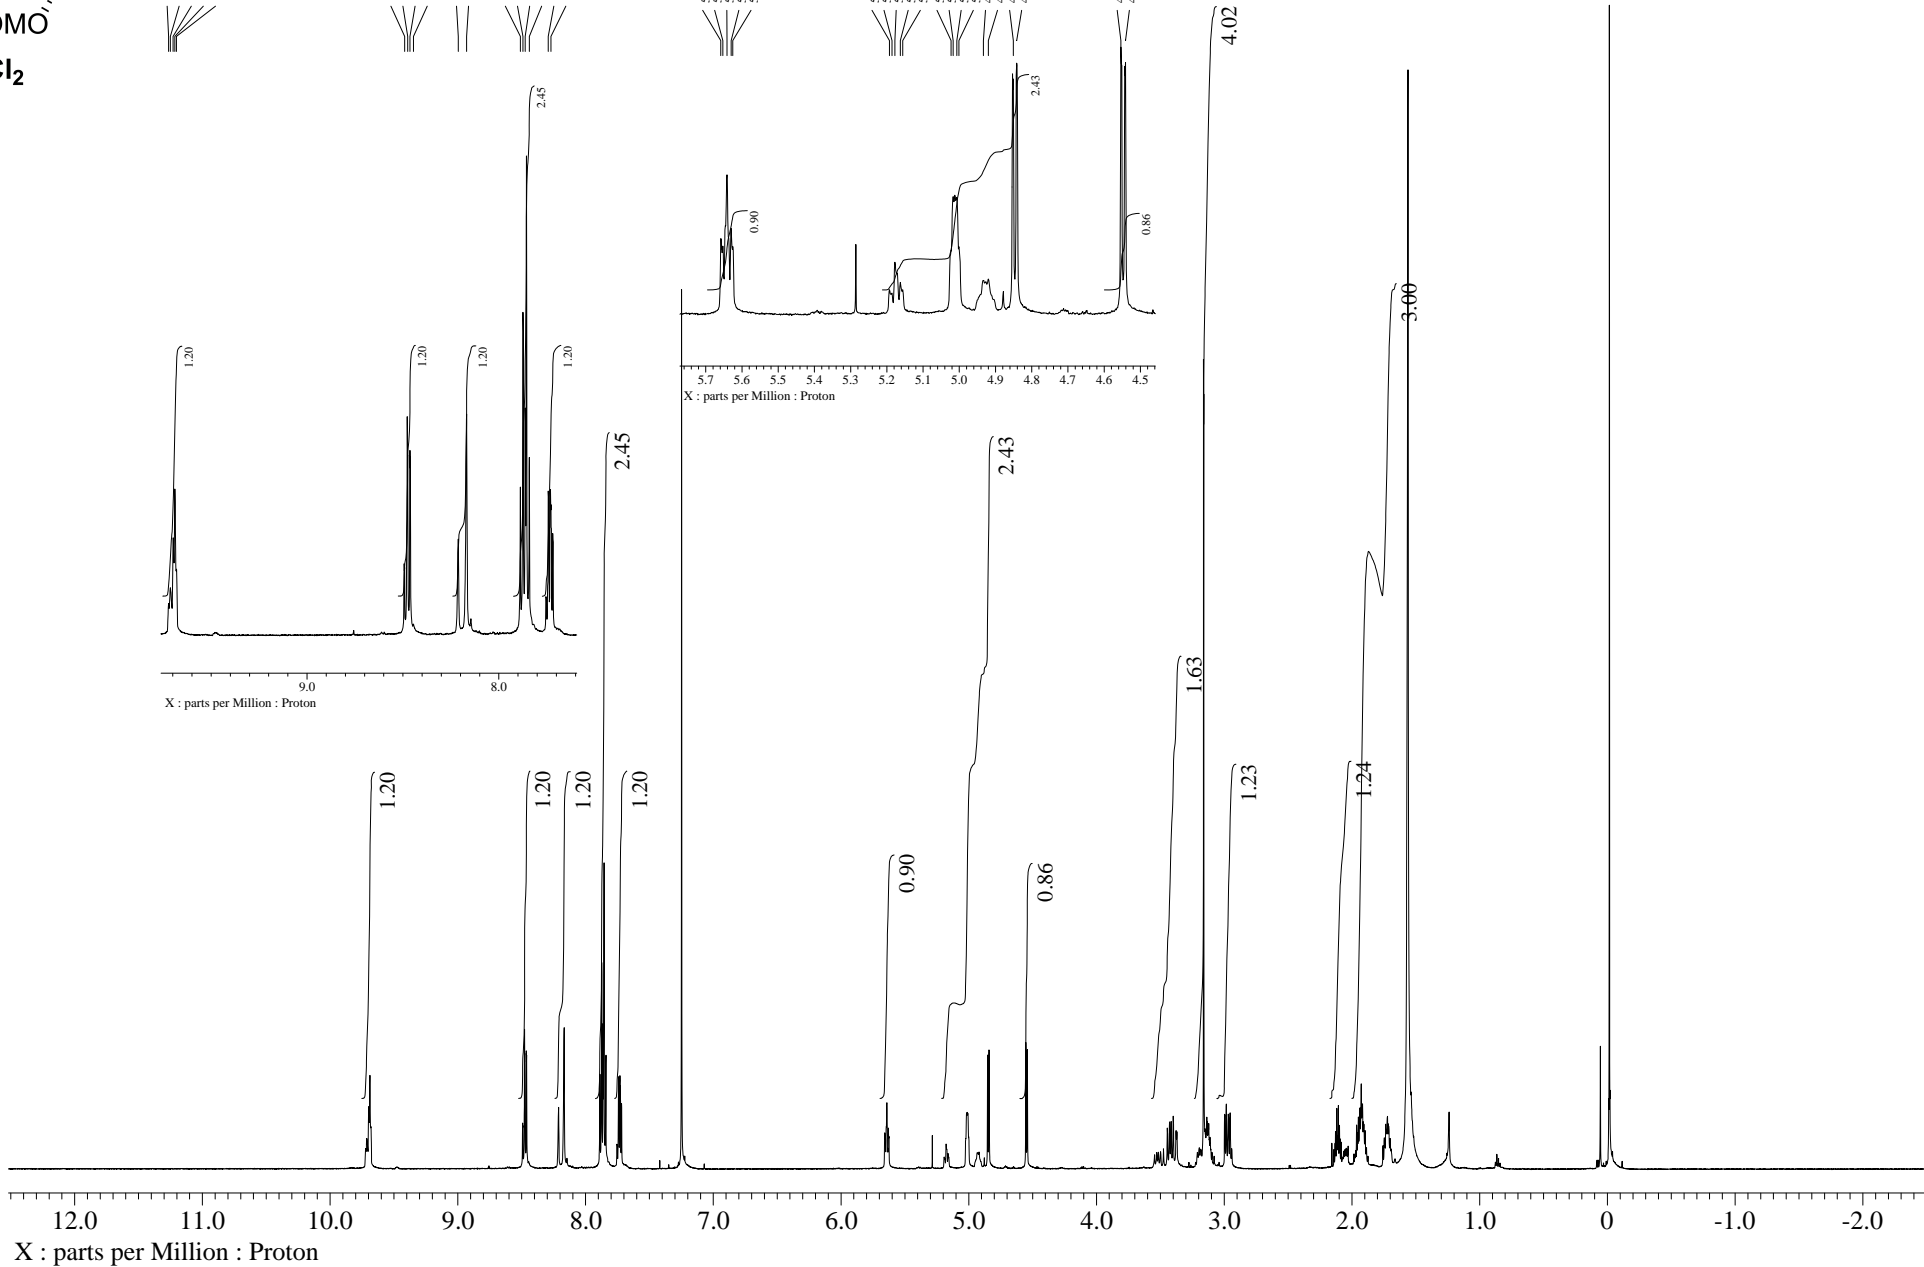

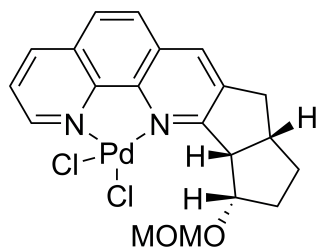

**L2-PdCl<sub>2</sub>**

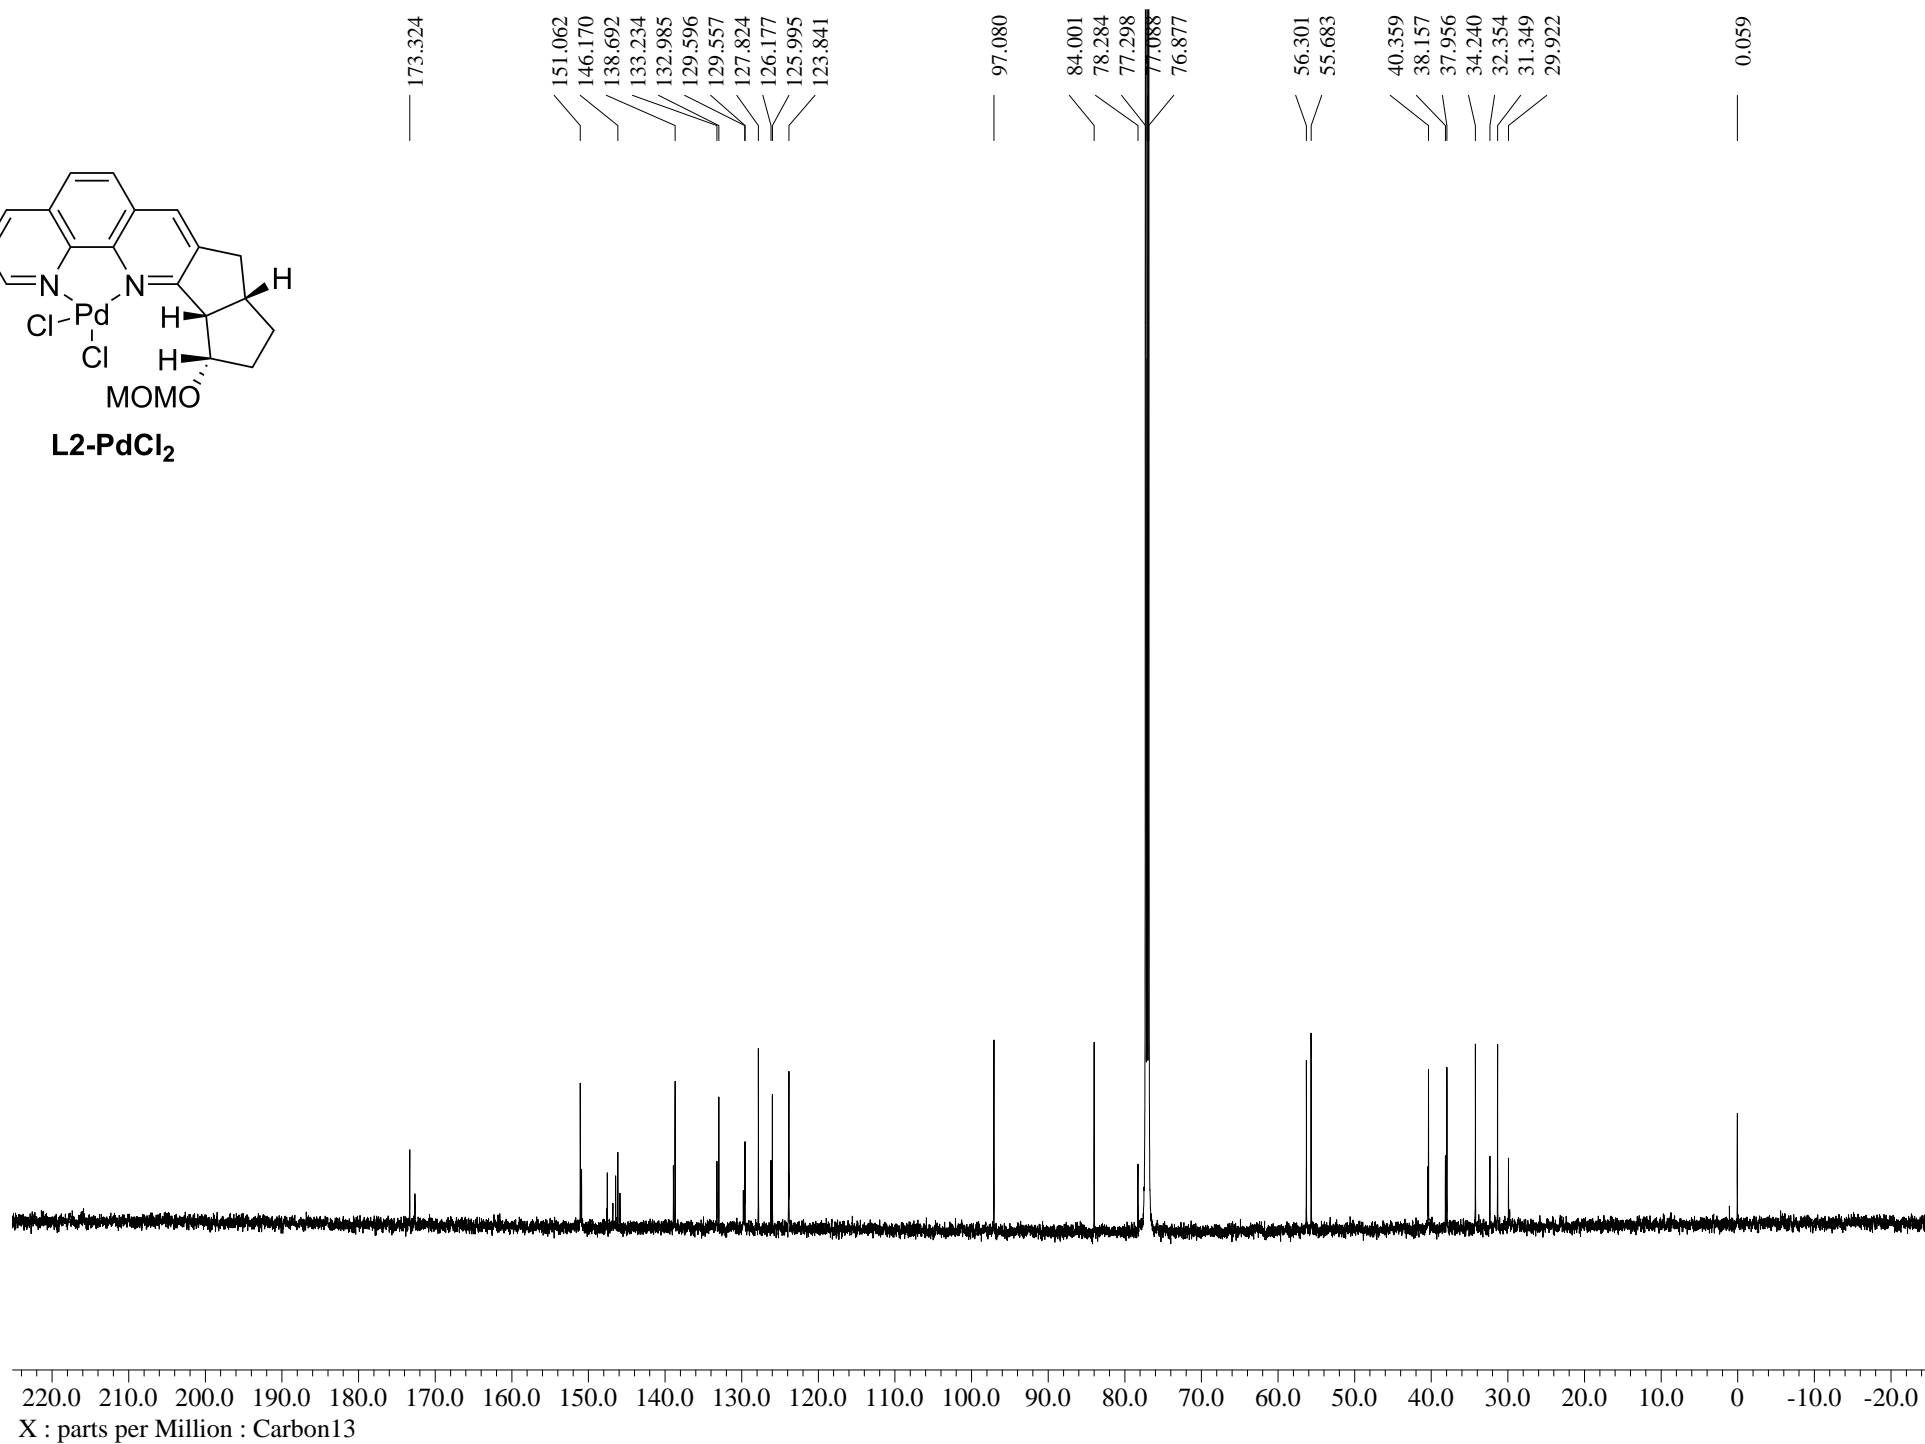

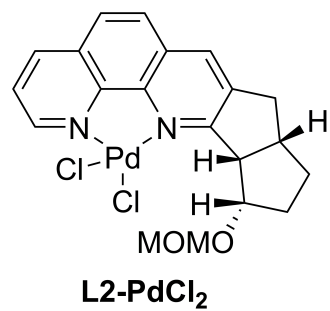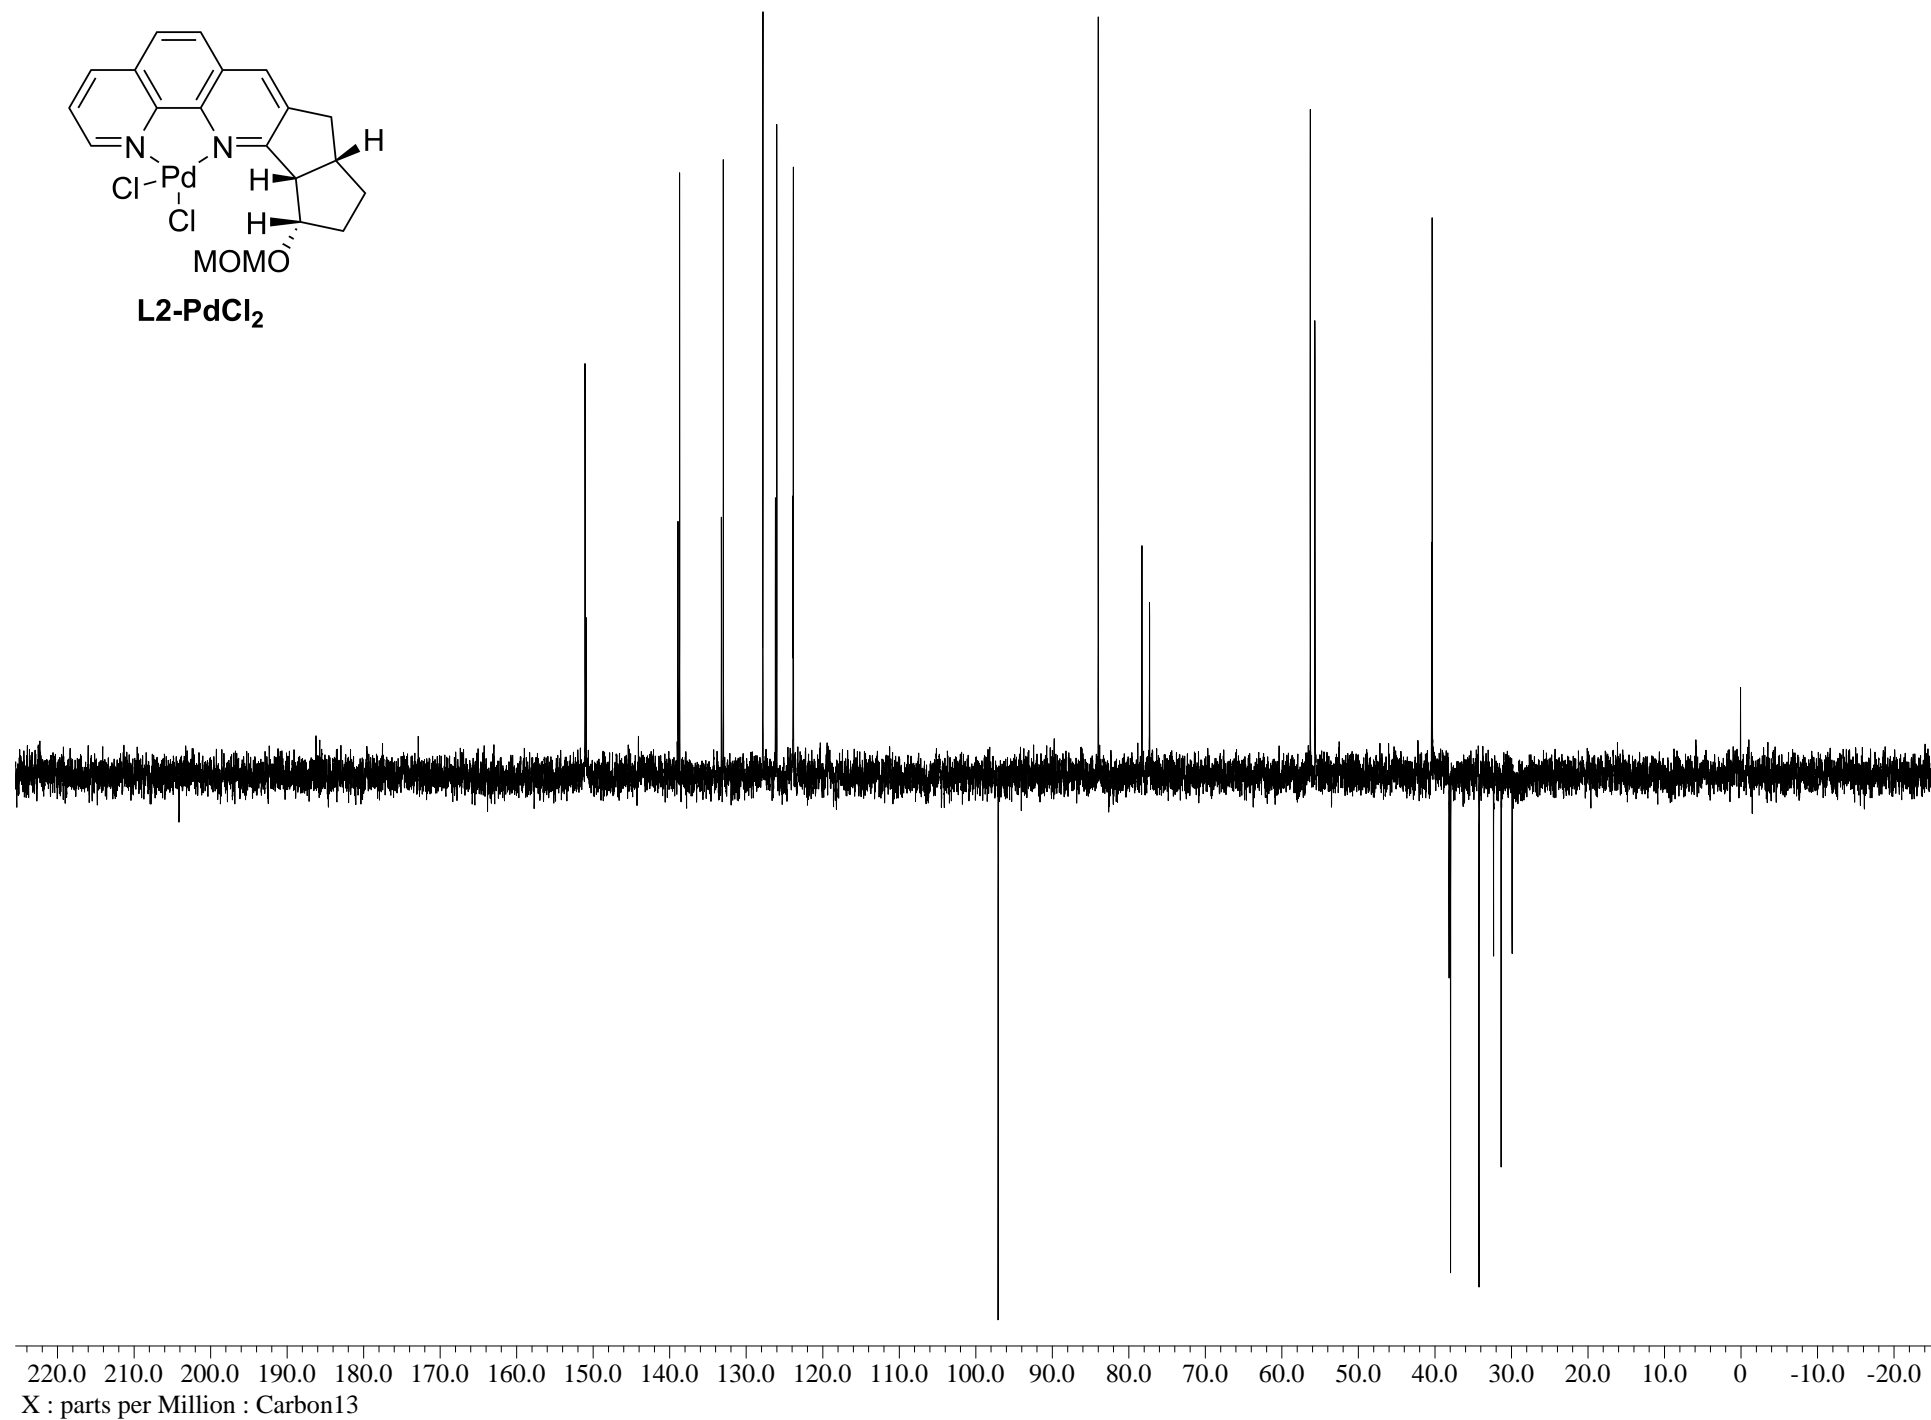



### iii Synthesis of L3

**(8a*S*,11*S*,11a*S*)-8,8a,9,10,11,11a-hexahydro-pentaleno[1,2-*b*][1,10]phenanthrolin-11-ol:**

#### L3

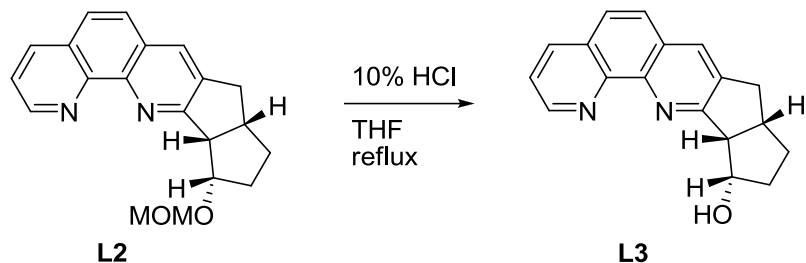

To a solution of **L2** (150 mg, 0.47 mmol) in THF (10 ml) was added 10% aq. HCl (0.1 ml) and mixture was heated at reflux for 2 h. After cooling to room temperature, the reaction mixture was diluted with CH<sub>2</sub>Cl<sub>2</sub>, neutralized with 6 M NaOH aqueous solution, and extracted with CH<sub>2</sub>Cl<sub>2</sub>, washed with water and brine, and dried over Na<sub>2</sub>SO<sub>4</sub> and concentrated *in vacuo* to give a crude product. The crude residue was purified by column chromatography (silica gel, 20: 1 CH<sub>2</sub>Cl<sub>2</sub>/MeOH, to afford the **L3** (78 mg, 60%) as off-white solid.

m.p. = 88 - 89 °C

$[\alpha]_D^{24} = +338.67$  (c 0.23, CHCl<sub>3</sub>)

**<sup>1</sup>H NMR** (400 MHz, Chloroform-*d*)  $\delta$  9.16 (d,  $J = 4.2$  Hz, 1H), 8.22 (d,  $J = 8.3$  Hz 1H), 8.01 (s, 1H), 7.73 (dd,  $J = 2.8, 8.7$  Hz, 2H), 7.59 (dd,  $J = 4.1, 7.8$  Hz, 1H), 4.85 (dd,  $J = 7.4, 11.9$  Hz, 1H), 4.07 - 4.04 (m, 1H), 3.45 (dd,  $J = 7.8, 9.1$  Hz, 1H), 3.16 - 2.96 (m, 2H), 2.08 - 2.01 (m, 1H), 1.95 - 1.86 (m, 1H), 1.72 - 1.59 (m, 2H),

**<sup>13</sup>C NMR** (100 MHz, Chloroform-*d*)  $\delta$  166.6 (C), 150.1 (CH), 146.1 (C), 145.4 (C), 139.1 (C), 136.0 (CH), 131.8 (CH), 128.4 (C), 127.9 (C), 126.8 (CH), 125.7 (CH), 122.6 (CH), 75.1 (CH), 55.4 (CH), 40.4 (CH), 37.2 (CH<sub>2</sub>), 35.4 (CH<sub>2</sub>), 31.6 (CH<sub>2</sub>)

**HRMS** (ESI-TOF)  $m/z$  Calculated for C<sub>18</sub>H<sub>16</sub>N<sub>2</sub>ONa [M+Na]<sup>+</sup> : 299.1660, found: 299.1662

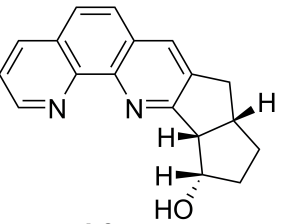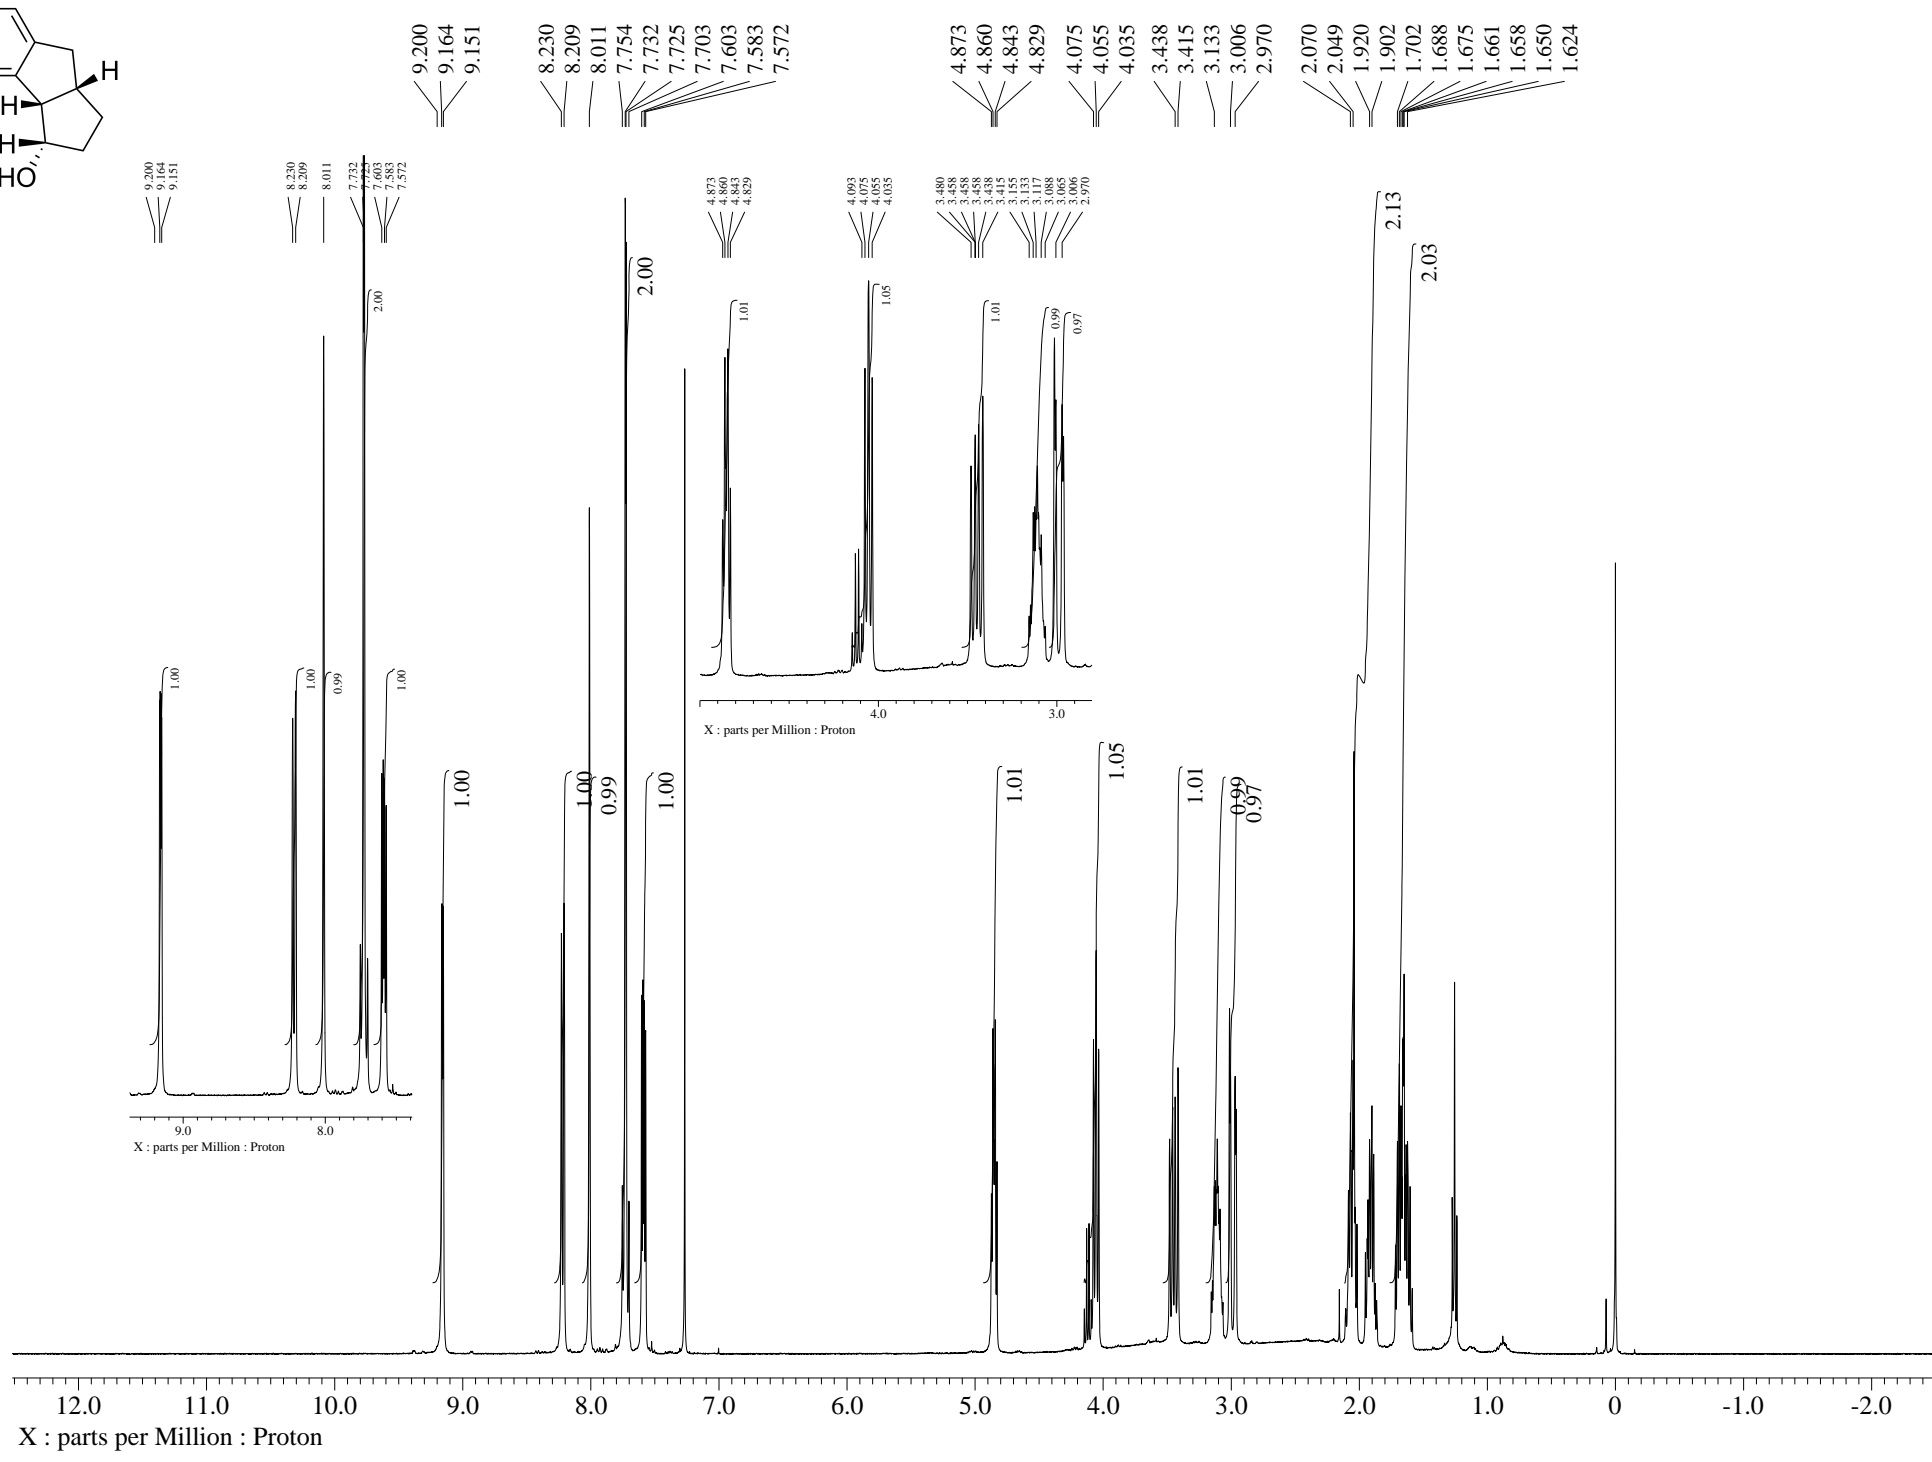

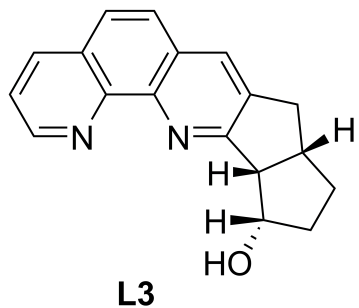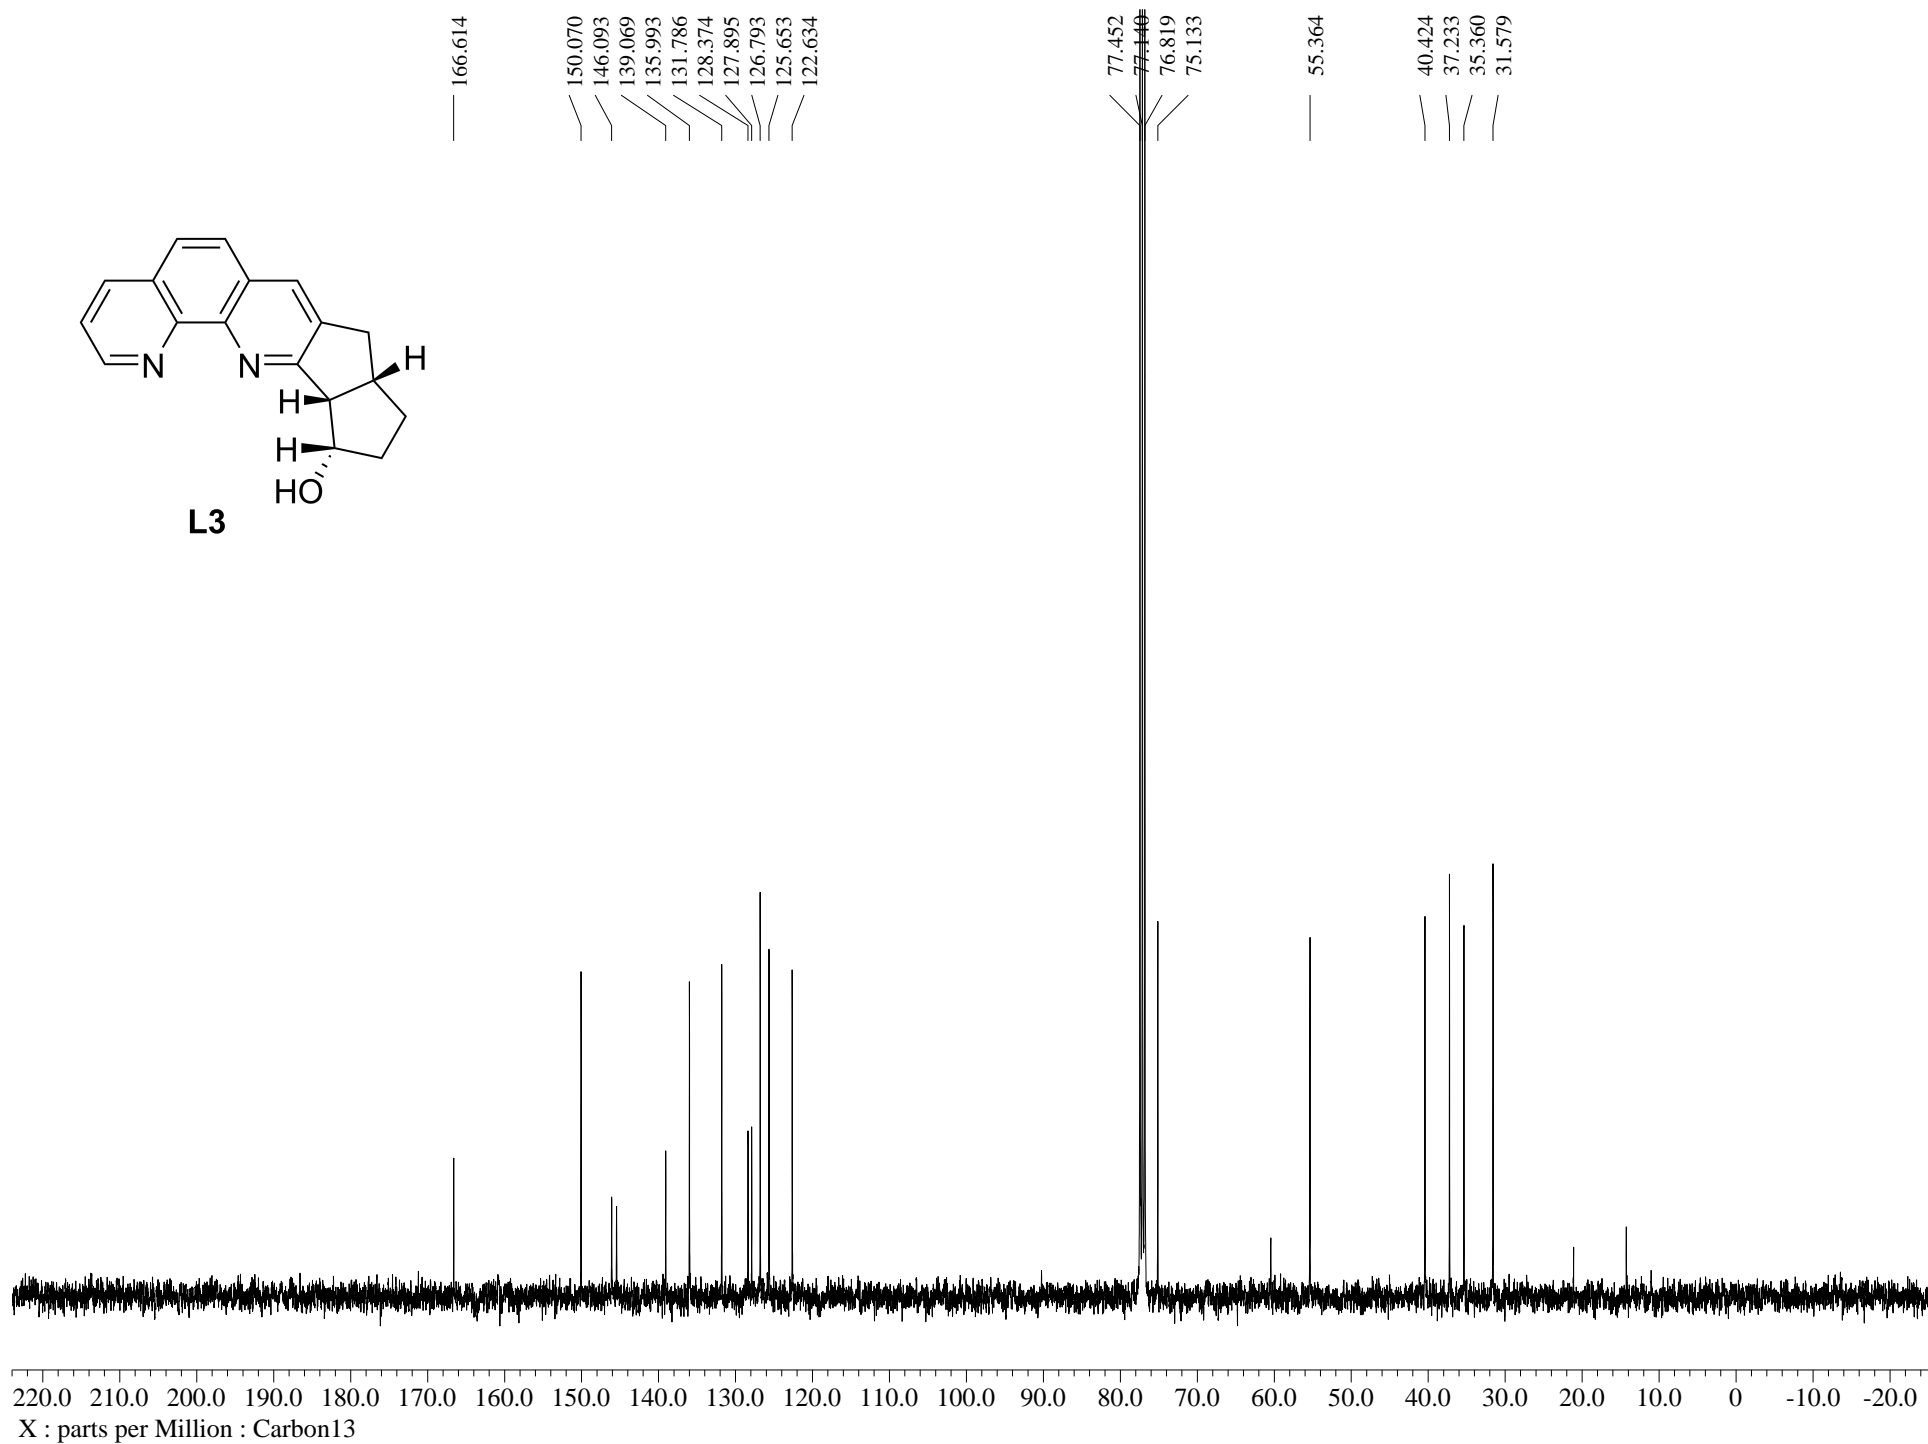

## ► Additional investigations of reaction conditions

### Optimization Details for Pd-complex Catalyzed conjugate addition reaction

**Table S1 Optimization of Solvents**

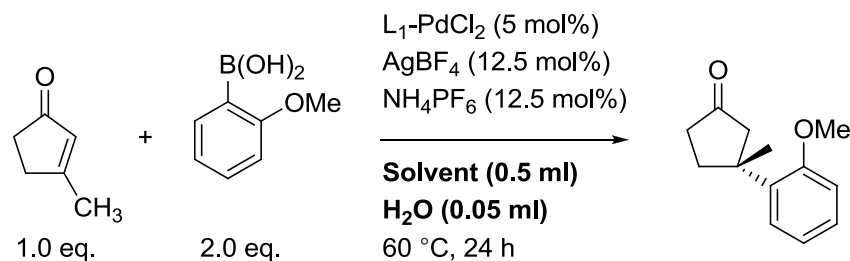

| Entry | Solvent                                | Yield (%) | e.e. (%) |
|-------|----------------------------------------|-----------|----------|
| 1     | DCE                                    | 91        | 98       |
| 2     | MeOH : H <sub>2</sub> O = 4:1          | 67        | 96       |
| 3     | <i>i</i> PrOH : H <sub>2</sub> O = 4:1 | 23        | 85       |
| 4     | MeOH                                   | 55        | 90       |
| 5     | EtOH                                   | 31        | 85       |
| 6     | H <sub>2</sub> O                       | 82        | 96       |
| 7     | DMA                                    | N.D.      | -        |
| 8     | THF                                    | 87        | 93       |
| 9     | toluene                                | 11        | 85       |
| 10    | 1,4-dioxane                            | 14        | 87       |
| 11    | CH <sub>3</sub> CN                     | N.D.      | -        |
| 12    | CCl <sub>4</sub>                       | 52        | 86       |

**Table S2 Optimization of Additives**

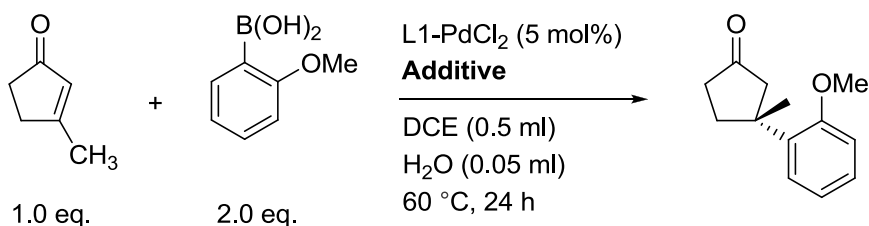

| Entry | Additive (mol%)                                                                         | Yield (%) | e.e. (%) |
|-------|-----------------------------------------------------------------------------------------|-----------|----------|
| 1     | AgBF <sub>4</sub> (12.5 mol%), NH <sub>4</sub> PF <sub>6</sub> (12.5 mol%)              | 90        | 98       |
| 2     | AgBF <sub>4</sub> (12.5 mol%)                                                           | 56        | 92       |
| 3     | NH <sub>4</sub> PF <sub>6</sub> (12.5 mol%)                                             | N. R.     | -        |
| 4     | Ag <sub>3</sub> PO <sub>4</sub> (4.2 mol%), NH <sub>4</sub> PF <sub>6</sub> (12.5 mol%) | 45        | 95       |
| 5     | AgTFA (12.5 mol%), NH <sub>4</sub> PF <sub>6</sub> (12.5 mol%)                          | 78        | 93       |
| 6     | AgOTf (12.5 mol%), NH <sub>4</sub> PF <sub>6</sub> (12.5 mol%)                          | 86        | 97       |
| 7     | AgPF <sub>6</sub> (12.5 mol%)                                                           | 90        | 98       |

**Table S3 Optimization of Reaction temperature**

Reaction scheme showing the conjugate addition of an *ortho*-methoxyphenylboronic acid to a methyl-substituted enone. The reaction conditions are: L1-PdCl<sub>2</sub> (5 mol%), AgBF<sub>4</sub> (12.5 mol%), NH<sub>4</sub>PF<sub>6</sub> (12.5 mol%), DCE (0.5 ml), H<sub>2</sub>O (0.05 ml), and Temp. The enone is used in 1.0 eq. and the boronic acid in 2.0 eq. The product is a cyclopentanone with a methyl group and an *ortho*-methoxyphenyl group.

| Entry | Temp. | Time (h) | Yield (%) | e.e. (%) |
|-------|-------|----------|-----------|----------|
| 1     | 60    | 8        | 81        | 98       |
| 2     | 60    | 18       | 90        | 98       |
| 3     | 80    | 1        | 56        | 97       |
| 4     | 80    | 3        | 73        | 98       |
| 5     | 23    | 24       | 11        | 97       |
| 6     | 23    | 72       | 69        | 98       |

### ► Additional investigations of the substrates

**Unreactive substrates and boronic acids in the Pd-catalyzed asymmetric conjugate addition reaction catalyzed by L1-PdCl<sub>2</sub>.**

enones:

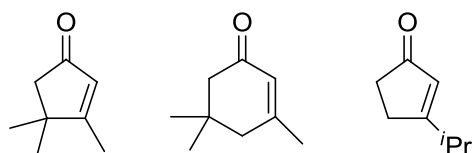

arylboronic acids:

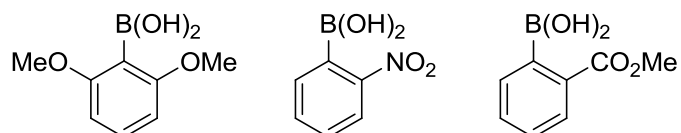

**Fig. S1 Unreactive *ortho*-substituted arylboronic acids and functionalized enones.**

► **Palladium catalyzed conjugate additions of arylboronic acid to enones.**

**General Procedure A for Table 1 (using a Pd-complex):**

To a 10 ml glass tube equipped with a stir bar was charged with 3-Methyl-2-cyclopent-1-one **1a** (13.4 mg, 0.14 mmol), 2-Methoxyphenyl boronic acid **2a** (42.6 mg, 0.28 mmol), **Pd-complex** ( $7.0 \times 10^{-3}$  mmol), followed by DCE (0.5 ml) was added via syringe under argon atmosphere. To this mixture was added 0.875 M  $\text{NH}_4\text{PF}_6$  aqueous solution (0.02 ml, 12.5 mmol) and 0.58 M  $\text{AgBF}_4$  aqueous solution (0.03 ml, 12.5 mmol) via syringe and allowed to stir for 24 h at 60 °C. Upon complete consumption of the enone (monitored by TLC), the reaction mixture was allowed to cool to rt and filtered through a pad of silica eluted with  $\text{Et}_2\text{O}$ . The filtrate was dried over  $\text{Na}_2\text{SO}_4$ , concentrated *in vacuo* to give a crude product. The crude residue was purified by column chromatography.

**General Procedure B for Table 1 (using a Ligand/ Pd(TFA)<sub>2</sub>):**

To a 10 ml glass tube equipped with a stir bar was charged with 3-Methyl-2-cyclopent-1-one **1a** (13.4 mg, 0.14 mmol), 2-Methoxyphenyl boronic acid **2a** (42.6 mg, 0.28 mmol), **Ligand** (6 mol%) and  $\text{Pd}(\text{TFA})_2$  (2.1 mg, 5 mol%), followed by DCE (0.5 ml) was added by syringe under argon atmosphere. To this mixture was added 0.875 M  $\text{NH}_4\text{PF}_6$  aqueous solution (0.02 ml, 12.5 mmol) and  $\text{H}_2\text{O}$  (0.03 ml) via syringe and allowed to stir for 24 h at 60 °C. The reaction mixture was allowed to cool to rt and filtered through a pad of silica eluted with  $\text{Et}_2\text{O}$ . The filtrate was dried over  $\text{Na}_2\text{SO}_4$ , concentrated *in vacuo* to give a crude product. The crude residue was purified by column chromatography.

### General Procedure for Scheme 1 and Table 2:

To a 10 ml glass tube equipped with a stir bar was charged with enone (0.14 mmol), arylboronic acid (0.28 mmol), **L1-PdCl<sub>2</sub>** (4.0 mg,  $7.0 \times 10^{-3}$  mmol), followed by DCE (0.5 ml) was added via syringe under argon atmosphere. To this mixture was added 0.875 M NH<sub>4</sub>PF<sub>6</sub> aqueous solution (0.02 ml, 12.5 mmol) and 0.58 M AgBF<sub>4</sub> aqueous solution (0.03 ml, 12.5 mmol) via syringe and allowed to stir for 24 h at 60 °C. Upon complete consumption of the enone (monitored by TLC), the reaction mixture was allowed to cool to rt and filtered through a pad of silica eluted with Et<sub>2</sub>O. The filtrate was dried over Na<sub>2</sub>SO<sub>4</sub>, concentrated *in vacuo* to give a crude product. The crude residue was purified by column chromatography.

### General Procedure for the Synthesis of Racemic 3-Alkyl-3-arylcyclopentanones

To a 10 ml glass tube equipped with a stir bar was charged with enone (0.14 mmol), arylboronic acid (0.28 mmol), **Phen-PdCl<sub>2</sub><sup>a</sup>** (5.0 mg,  $14.0 \times 10^{-3}$  mmol), followed by DCE (0.6 ml) was added via syringe under argon atmosphere. To this mixture was added 0.875 M NH<sub>4</sub>PF<sub>6</sub> aqueous solution (0.04 ml, 12.5 mmol) and 0.58 M AgBF<sub>4</sub> aqueous solution (0.06 ml, 12.5 mmol) via syringe and allowed to stir for 48 h at 60 °C. The reaction mixture was allowed to cool to rt and filtered through a pad of silica eluted with Et<sub>2</sub>O. The filtrate was dried over Na<sub>2</sub>SO<sub>4</sub>, concentrated *in vacuo* to give a crude product. The crude residue was purified by column chromatography.

<sup>a</sup> **Phen-PdCl<sub>2</sub>** was synthesized according to the literature procedure (D. İnci, R. Aydin, *J. Mol. Struct.*, 2019, **1187**, 23).

### (R)-3-(2-methoxyphenyl)-3-methylcyclopentanone: **3a**<sup>7</sup>

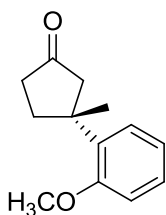

Synthesized according to General Procedure A from 3-Methyl-2-cyclopent-1-one **1a** (0.14 mmol, 13.4 mg) and 2-Methoxyphenyl boronic acid **2a** (0.28 mmol, 42.6 mg).

The crude product was purified by flash chromatography (Hexane: AcOEt = 20: 1) to yield **3a** (25.7 mg, 91%, 98% ee) as a colorless oil.

**<sup>1</sup>H NMR** (400 MHz, Chloroform-*d*)  $\delta$  7.25 - 7.20 (m, 2H), 6.95 - 6.89 (m, 2H), 3.83 (s, 3H), 2.67 (d, *J* = 18.3 Hz, 1H), 2.60 (d, *J* = 18.3 Hz, 1H), 2.45 - 2.30 (m, 4H), 1.39 (s, 3H)

**<sup>13</sup>C NMR** (100 MHz, Chloroform-*d*)  $\delta$  220.1 (C), 157.7 (C), 136.2 (C), 127.8 (CH), 126.4 (CH), 120.6 (CH), 111.5 (CH), 55.0 (CH<sub>3</sub>), 52.4 (CH<sub>2</sub>), 42.7 (C), 36.5 (CH<sub>2</sub>), 35.0 (CH<sub>2</sub>), 26.3 (CH<sub>3</sub>)

\*The NMR data match with those reported in literature.<sup>7</sup>

**HRMS** (ESI-TOF) *m/z* Calculated for C<sub>13</sub>H<sub>16</sub>O<sub>2</sub>Na [M+Na]<sup>+</sup>: 227.1048, found: 227.1042

$[\alpha]_D^{20} = +63.6$  (c 0.46, CHCl<sub>3</sub>) for a 98% ee, (Lit.<sup>7</sup>  $[\alpha]_D^{20} = -21.0$  (c 0.01, CHCl<sub>3</sub>) for a 80% ee: S isomer)

Chiral HPLC analysis on a CHIRALPAK OJ-H column, Hexane: *i*PrOH = 99: 1, 40 °C, flow = 1.0 ml/min, UV detection at 254 nm, retention times (min): 12.1 (major) and 14.9 (minor).

The absolute configuration was determined by comparison of the optical rotation with literature value.<sup>7</sup>

### Racemic sample:

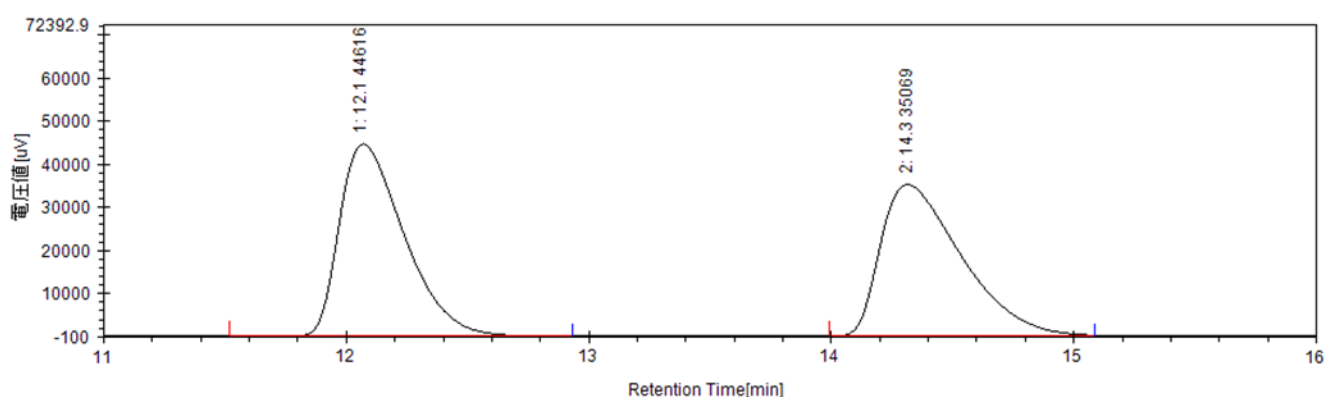

| Peak | Rt[min] | Height [uV] | Area [uV*min] | Area % | NTP    | Symmetry factor | Resolution |
|------|---------|-------------|---------------|--------|--------|-----------------|------------|
| 1    | 12.1    | 44616       | 13764.7       | 50.505 | 9782.6 | 1.613           | ***        |
| 2    | 14.3    | 35069       | 13489.5       | 49.495 | 8759.6 | 1.76            | 4.102      |



### Enantiomeric sample (3a):

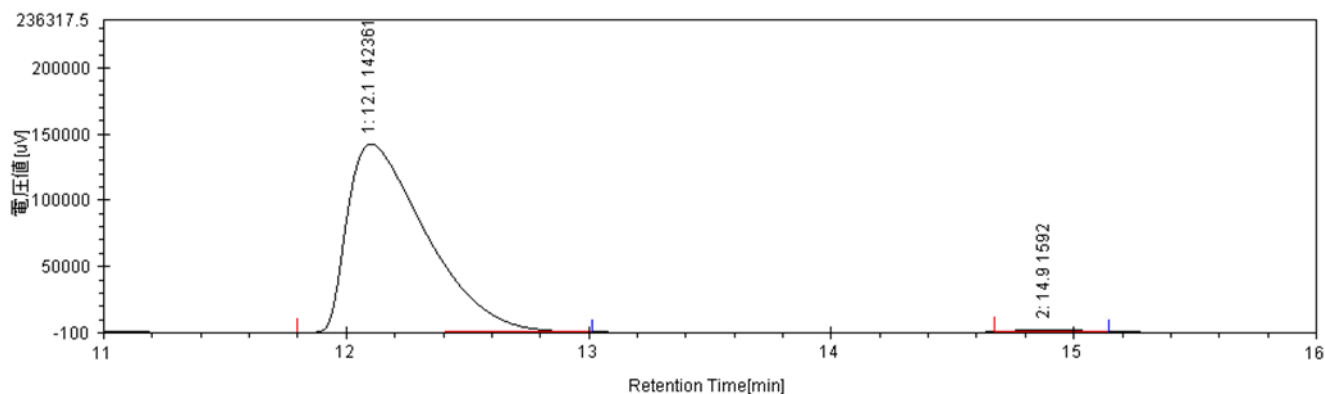

| Peak | Rt[min] | Height [uV] | Area [uV*min] | Area % | NTP     | Symmetry factor | Resolution |
|------|---------|-------------|---------------|--------|---------|-----------------|------------|
| 1    | 12.1    | 142361      | 53283.2       | 99.215 | 6654.7  | 2.146           | ***        |
| 2    | 14.9    | 1592        | 421.4         | 0.785  | 17232.7 | 1.118           | 5.332      |

### (R)-3-methyl-3-o-tolylcyclopentanone: **3b**<sup>7</sup>

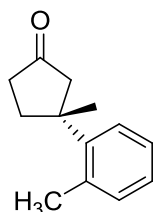

Synthesized according to General Procedure A from 3-Methyl-2-cyclopent-1-one **1a** (0.14 mmol, 13.4 mg) and 2-Methylphenyl boronic acid (0.28 mmol, 38.1 mg). The crude product was purified by flash chromatography (Hexane: AcOEt = 20: 1) to yield **3b** (19.2 mg, 73%, 94% ee) as a colorless oil.

<sup>1</sup>H NMR (400 MHz, Chloroform-*d*)  $\delta$  7.24 - 7.12 (m, 4H), 2.74 (d, *J* = 17.4 Hz, 1H), 2.60 (d, *J* = 17.4 Hz, 1H), 2.52 - 2.35 (m, 4H), 1.38 (s, 3H)

<sup>13</sup>C NMR (100 MHz, Chloroform-*d*)  $\delta$  218.9 (C), 146.6 (C), 135.7 (C), 132.6 (CH), 126.6 (CH), 126.3 (CH), 126.1 (CH), 53.0 (CH<sub>2</sub>), 44.6 (C), 36.1 (CH<sub>2</sub>), 36.0 (CH<sub>2</sub>), 26.6 (CH<sub>3</sub>), 22.6 (CH<sub>3</sub>)

\*The NMR data match with those reported in literature.<sup>7</sup>

HRMS (ESI-TOF) *m/z* Calculated for C<sub>13</sub>H<sub>16</sub>ONa [M+Na]<sup>+</sup>: 211.1099, found: 211.1089

$[\alpha]_D^{24} = +46.38$  (c 0.5, CHCl<sub>3</sub>) for a 94% ee

Chiral HPLC analysis on a CHIRALPAK OB-H column, Hexane: *i*PrOH = 99: 1, 40 °C, flow = 1.0 ml/min, UV detection at 210 nm, retention times (min): 15.5 (major) and 19.4 (minor).

The absolute configuration was determined by comparison of the optical rotation with literature value.<sup>7</sup>

**Racemic sample:**

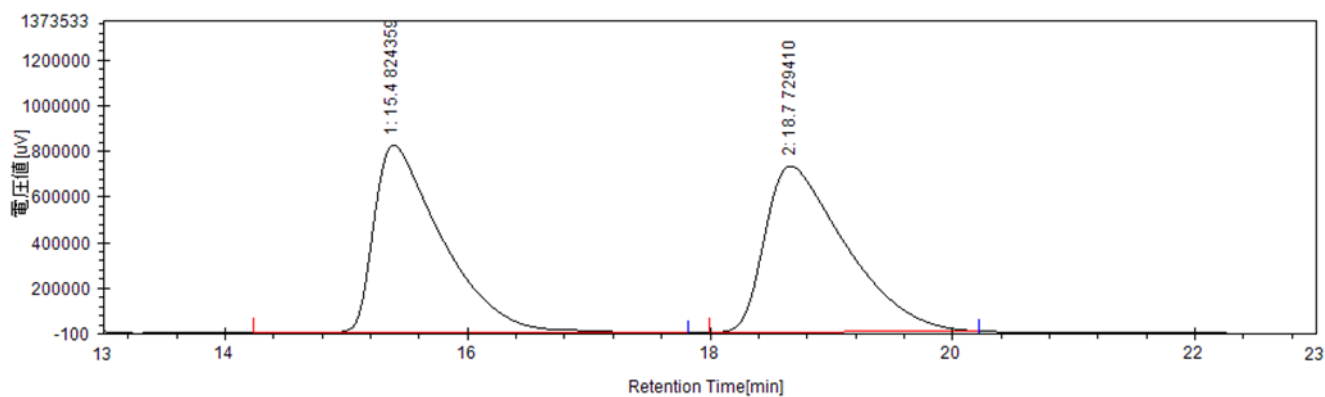

| Peak | Rt[min] | Height [uV] | Area [uV*min] | Area % | NTP    | Symmetry factor | Resolution |
|------|---------|-------------|---------------|--------|--------|-----------------|------------|
| 1    | 15.4    | 824359      | 536029.4      | 48.768 | 3857.4 | 2.151           | ***        |
| 2    | 18.7    | 729410      | 563103.8      | 51.232 | 3790.8 | 1.828           | 2.98       |

**Enantiomeric sample (3b):**

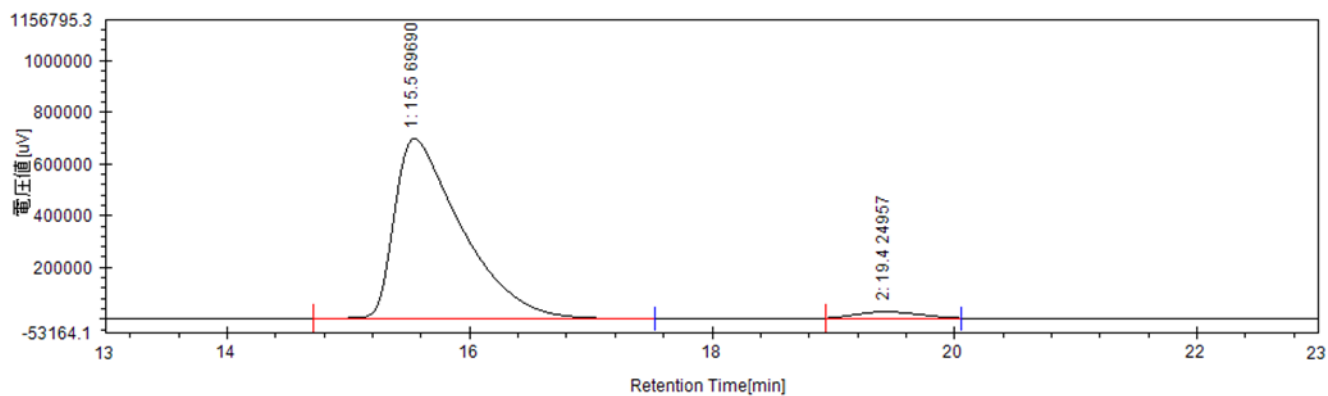

| Peak | Rt[min] | Height [uV] | Area [uV*min] | Area % | NTP    | Symmetry factor | Resolution |
|------|---------|-------------|---------------|--------|--------|-----------------|------------|
| 1    | 15.5    | 696904      | 446952.4      | 96.859 | 3997.8 | 2.107           | ***        |
| 2    | 19.4    | 24957       | 14492.7       | 3.141  | 6412.6 | 1.139           | 3.986      |

**(R)-3-(2-chlorophenyl)-3-methylcyclopentanone: 3c<sup>7a</sup>**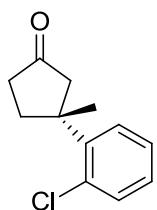

Synthesized according to General Procedure A from 3-Methyl-2-cyclopent-1-one **1a** (0.14 mmol, 13.4 mg) and 2-Chlorophenyl boronic acid (0.28 mmol, 43.8 mg). The crude product was purified by flash chromatography (Hexane: AcOEt = 20: 1) to yield **3c** (29.1 mg, 80%, 98% ee) as a colorless oil.

<sup>1</sup>H NMR (400 MHz, Chloroform-*d*) δ 7.39 - 7.16 (m, 4H), 2.91 (dd, *J* = 1.8, 18.3 Hz, 1H), 2.66 (d, *J* = 18.3 Hz, 1H), 2.55 - 2.36 (m, 4H), 1.48 (s, 3H)

<sup>13</sup>C NMR (100 MHz, Chloroform-*d*) δ 218.5 (C), 144.9 (C), 133.4 (C), 131.8 (CH), 128.0 (CH), 127.7 (CH), 127.1 (CH), 52.2 (CH<sub>2</sub>), 44.4 (C), 36.2 (CH<sub>2</sub>), 35.2 (CH<sub>2</sub>), 25.6 (CH<sub>3</sub>)

\*The NMR data match with those reported in literature.<sup>7a</sup>

HRMS (ESI-TOF) *m/z* Calculated for C<sub>12</sub>H<sub>13</sub>ClONa [M+Na]<sup>+</sup>: 231.0553, found: 227.0550

[α]<sub>D</sub><sup>20</sup> = +23.66 (c 0.08, CHCl<sub>3</sub>) for a 98% ee

Chiral HPLC analysis on a CHIRALPAK OJ-H column, Hexane: *i*PrOH = 99: 1, 40 °C, flow = 1.0 ml/min, UV detection at 254 nm, retention times (min): 11.4 (major) and 13 (minor).

The absolute configuration was determined by comparison of the optical rotation with literature value.<sup>7a</sup>

**Racemic sample:**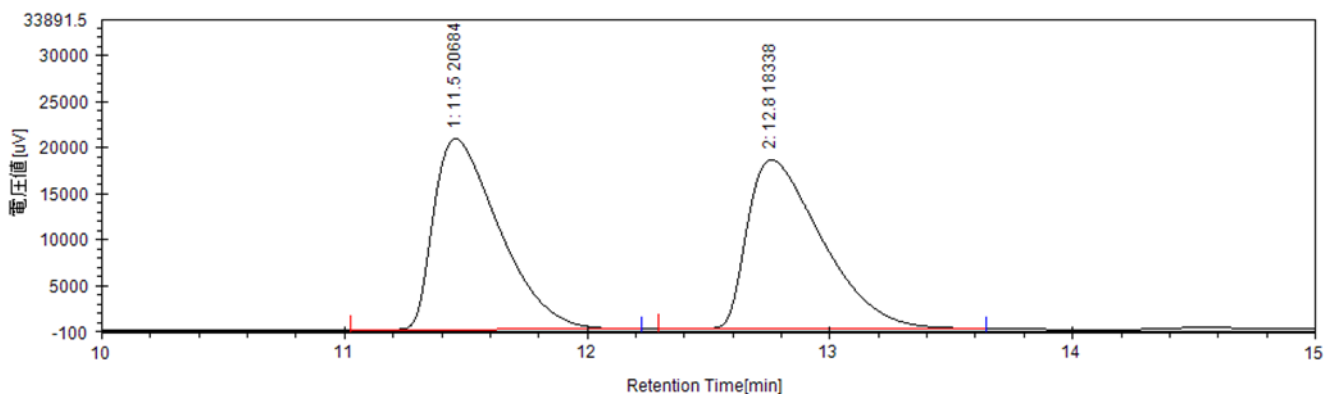

| Peak | Rt[min] | Height [uV] | Area [uV*min] | Area % | NTP    | Symmetry factor | Resolution |
|------|---------|-------------|---------------|--------|--------|-----------------|------------|
| 1    | 11.5    | 20684       | 6448.9        | 49.729 | 8500.4 | 1.807           | ***        |
| 2    | 12.8    | 18338       | 6519.2        | 50.271 | 8141.8 | 1.9             | 2.453      |

### Enantiomeric sample (3c):

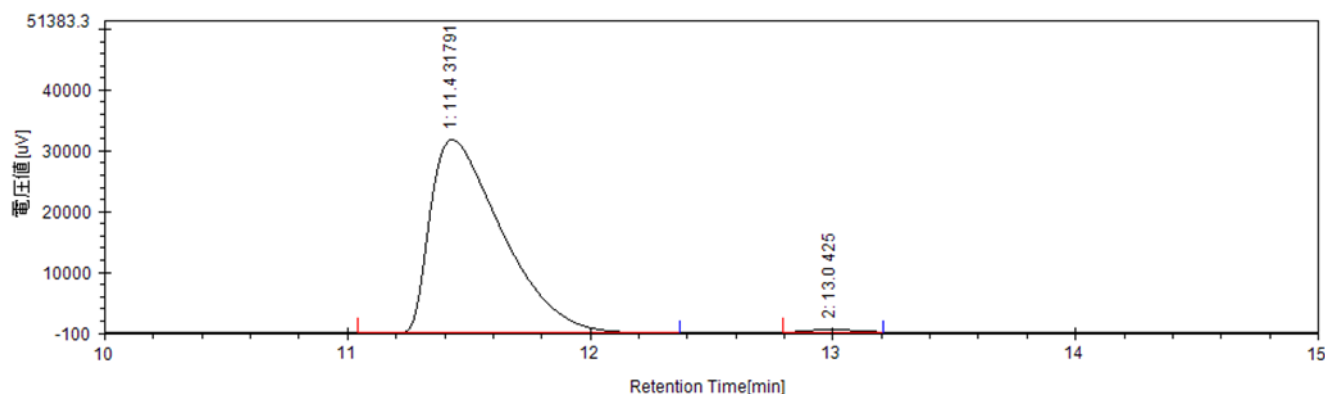

| Peak | Rt[min] | Height [uV] | Area [uV*min] | Area % | NTP     | Symmetry factor | Resolution |
|------|---------|-------------|---------------|--------|---------|-----------------|------------|
| 1    | 11.4    | 31791       | 10850.9       | 99.111 | 7131.3  | 2.031           | ***        |
| 2    | 13      | 425         | 97.4          | 0.889  | 17786.4 | 1.048           | 3.356      |

### (R)-3-(2-bromophenyl)-3-methylcyclopentanone: 3d

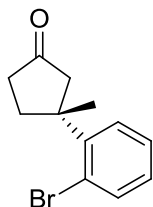

Synthesized according to General Procedure A from 3-Methyl-2-cyclopent-1-one **1a** (0.14 mmol, 13.4 mg) and 2-Bromophenyl boronic acid (0.28 mmol, 56.2 mg). The crude product was purified by flash chromatography (Hexane: AcOEt = 20: 1) to yield **3d** (21 mg, 60%, 98% ee) as a colorless oil.

**<sup>1</sup>H NMR** (400 MHz, Chloroform-*d*)  $\delta$  7.61 (d,  $J$  = 8.8 Hz, 1H), 7.35 - 7.27 (m, 2H), 7.12 - 7.08 (m, 1H), 3.02 (dd,  $J$  = 1.8, 17.3 Hz, 1H), 2.67 (d,  $J$  = 17.8 Hz, 1H), 2.59 - 2.36 (m, 4H), 1.51 (s, 3H)

**<sup>13</sup>C NMR** (100 MHz, Chloroform-*d*)  $\delta$  218.3 (C), 146.3 (C), 135.5 (CH), 128.2 (CH), 128.1 (CH), 127.6 (CH), 122.6 (C), 52.3 (CH<sub>2</sub>), 45.1 (C), 36.4 (CH<sub>2</sub>), 35.4 (CH<sub>2</sub>), 25.7 (CH<sub>3</sub>)

**IR** (neat)  $\nu_{\text{max}}$ : 1737, 1498, 1224, 1052 cm<sup>-1</sup>

**HRMS** (ESI-TOF)  $m/z$  Calculated for C<sub>12</sub>H<sub>13</sub>BrONa [M+Na]<sup>+</sup>: 275.0047, found: 275.0044

$[\alpha]_{\text{D}}^{24}$  = +56.43 ( $c$  0.58, CHCl<sub>3</sub>) for a 98% ee

Chiral HPLC analysis on a CHIRALPAK OJ-H column, Hexane: *i*PrOH = 99: 1, 40 °C, flow = 1.0 ml/min, UV detection at 254 nm, retention times (min): 13 (major) and 15.3 (minor).

**Racemic sample:**

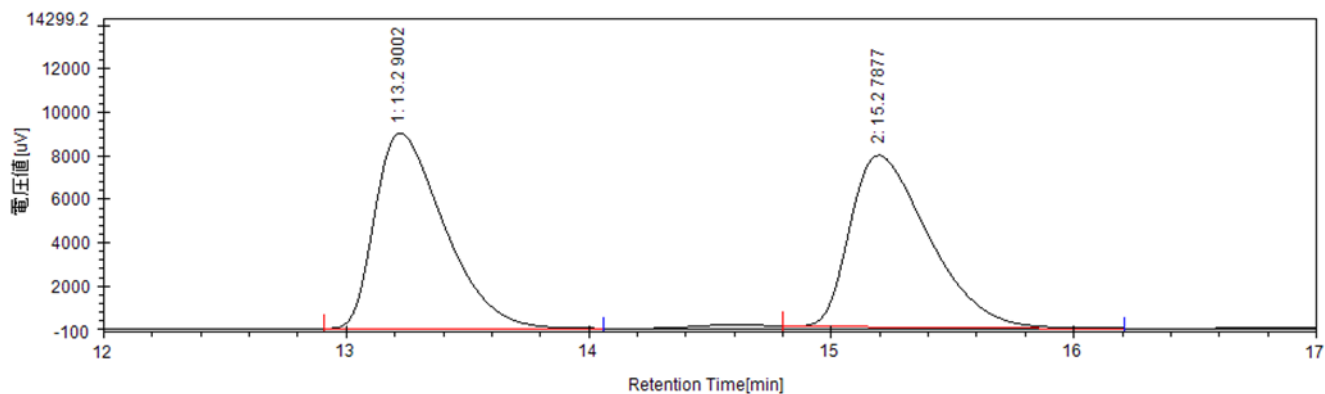

| Peak | Rt[min] | Height [uV] | Area [uV*min] | Area % | NTP     | Symmetry factor | Resolution |
|------|---------|-------------|---------------|--------|---------|-----------------|------------|
| 1    | 13.2    | 9002        | 2977.7        | 50.227 | 10275   | 1.569           | ***        |
| 2    | 15.2    | 7877        | 2950.8        | 49.773 | 10466.1 | 1.547           | 3.548      |

**Enantiomeric sample (3d):**

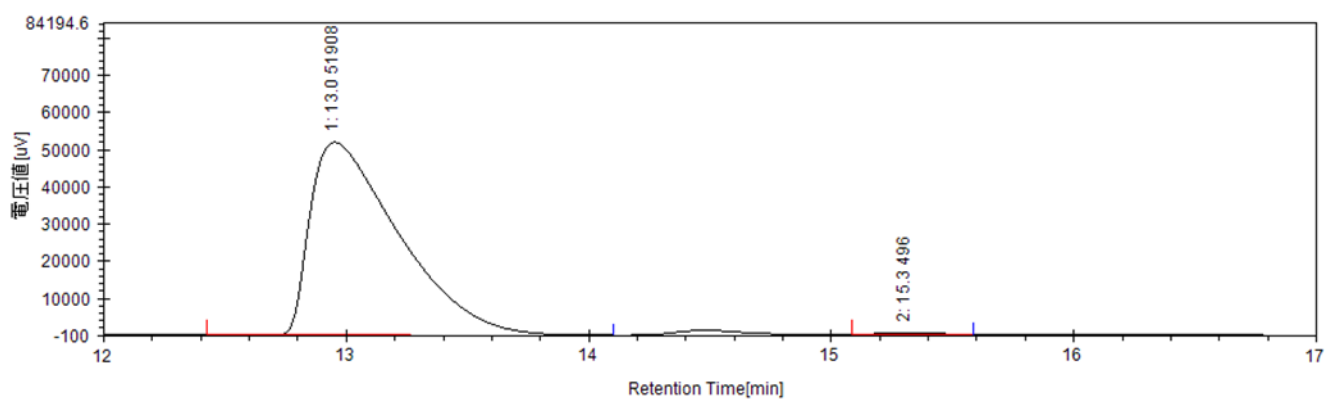

| Peak | Rt[min] | Height [uV] | Area [uV*min] | Area % | NTP    | Symmetry factor | Resolution |
|------|---------|-------------|---------------|--------|--------|-----------------|------------|
| 1    | 13      | 51908       | 21965.5       | 99.392 | 5986.2 | 2.379           | ***        |
| 2    | 15.3    | 496         | 134.3         | 0.608  | 17908  | 1.111           | 4.196      |

### (R)-3-(2,5-dimethoxyphenyl)-3-methylcyclopentanone: **3e**

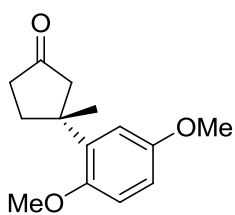

Synthesized according to General Procedure A from 3-Methyl-2-cyclopent-1-one **1a** (0.14 mmol, 13.4 mg) and 2,5-Dimethoxy phenyl boronic acid (0.28 mmol, 51.0 mg). The crude product was purified by flash chromatography (Hexane: AcOEt = 20: 1) to yield **3e** (30.8 mg, 94%, 98% ee) as a colorless oil.

**<sup>1</sup>H NMR** (400 MHz, Chloroform-*d*)  $\delta$  6.89 - 6.72 (m, 3H), 3.78 (s, 3H), 3.78 (s, 3H), 2.66 (d,  $J = 17.9$  Hz, 1H), 2.62 (d,  $J = 17.8$  Hz, 1H), 2.46 - 2.26 (m, 4H), 2.21 (s, 3H), 1.38 (s, 3H)

**<sup>13</sup>C NMR** (100 MHz, Chloroform-*d*)  $\delta$  220.0 (C), 153.5 (C), 152.0 (C), 137.7 (C), 114.1 (CH), 112.1 (CH), 110.6 (CH), 55.8 (CH<sub>3</sub>), 55.6 (CH<sub>3</sub>), 52.3 (CH<sub>2</sub>), 42.8 (C), 36.5 (CH<sub>2</sub>), 34.9 (CH<sub>2</sub>), 26.3 (CH<sub>3</sub>)

**IR** (neat)  $\nu_{\text{max}}$ : 1737, 1586, 1498, 1224, 1052  $\text{cm}^{-1}$

**HRMS** (ESI-TOF)  $m/z$  Calculated for C<sub>14</sub>H<sub>18</sub>O<sub>3</sub>Na [M+Na]<sup>+</sup>: 257.1154, found: 257.1155

$[\alpha]_{\text{D}}^{24} = +49.8$  (c 0.39, CHCl<sub>3</sub>) for a 98% ee

Chiral HPLC analysis on a CHIRALPAK OJ-H column, Hexane: *i*PrOH = 99: 1, 40 °C, flow = 0.5 ml/min, UV detection at 225 nm, retention times (min): 39.9 (minor) and 46.9 (major).

### Racemic sample:

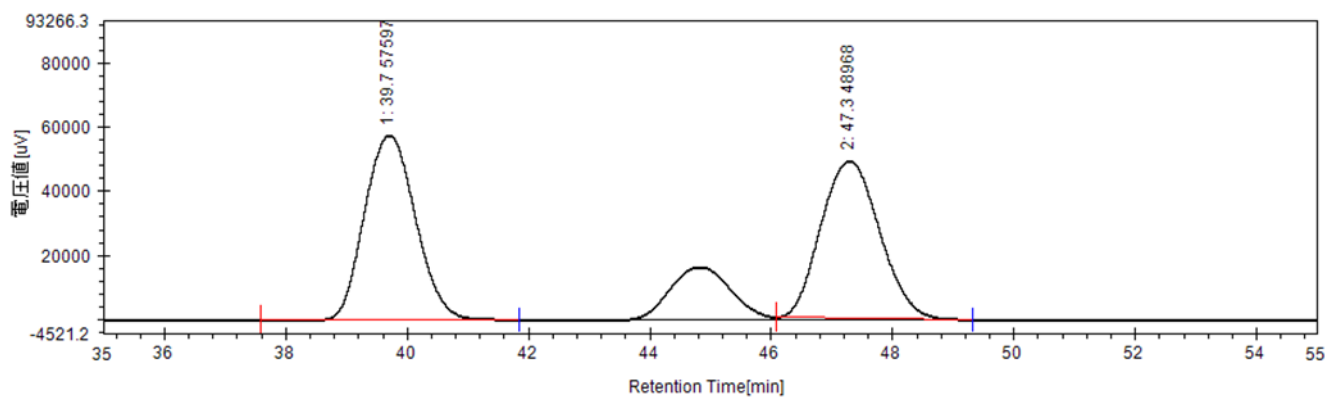

| Peak | Rt[min] | Height [uV] | Area [uV*min] | Area % | NTP     | Symmetry factor | Resolution |
|------|---------|-------------|---------------|--------|---------|-----------------|------------|
| 1    | 39.7    | 57597       | 55826.7       | 50.581 | 10195.4 | 1.109           | ***        |
| 2    | 47.3    | 48968       | 54543.6       | 49.419 | 10813.6 | 1.111           | 4.483      |

### Enantiomeric sample (3e):

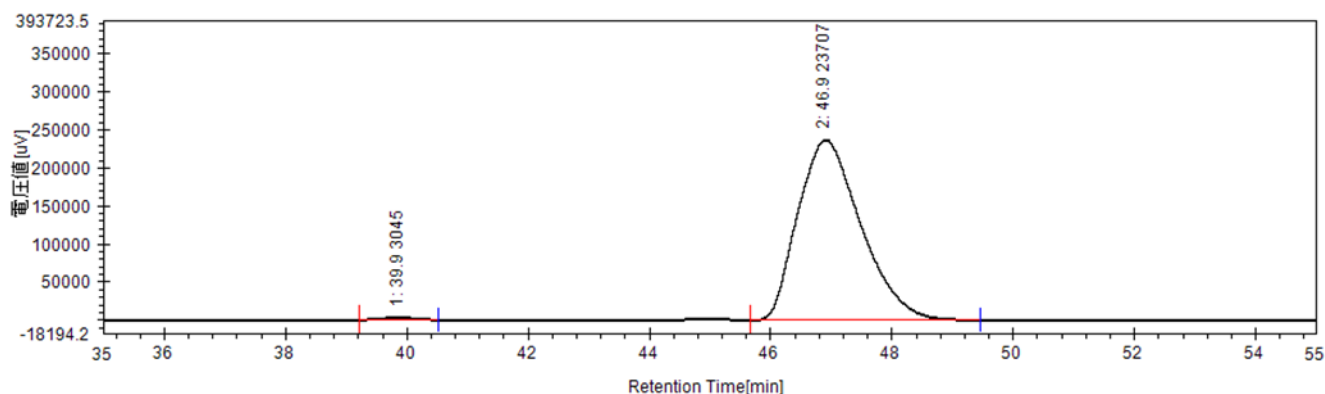

| Peak | Rt[min] | Height [uV] | Area [uV*min] | Area % | NTP     | Symmetry factor | Resolution |
|------|---------|-------------|---------------|--------|---------|-----------------|------------|
| 1    | 39.9    | 3045        | 2330.1        | 0.816  | 14482.8 | 0.992           | ***        |
| 2    | 46.9    | 237077      | 283294.4      | 99.184 | 9455    | 1.317           | 4.339      |

### (R)-3-(2,5-dimethoxy-4-methylphenyl)-3-methylcyclopentanone: 3f<sup>7a</sup>

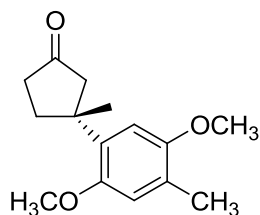

Synthesized according to General Procedure A from 3-Methyl-2-cyclopent-1-one **1a** (0.14 mmol, 13.4 mg) and 2,5-Dimethoxy-4-methyl phenyl boronic acid (0.28 mmol, 54.9 mg). The crude product was purified by flash chromatography (Hexane: AcOEt = 20: 1) to yield **3f** (31.1 mg, 90%, 95% ee) as a colorless oil.

**<sup>1</sup>H NMR** (400 MHz, Chloroform-*d*)  $\delta$  6.71 (s, 2H), 3.80 (s, 3H), 3.78 (s, 3H), 2.66 (d,  $J = 18.3$  Hz, 1H), 2.60 (d,  $J = 17.8$  Hz, 1H), 2.44 - 2.28 (m, 4H), 2.21 (s, 3H), 1.38 (s, 3H)

**<sup>13</sup>C NMR** (100 MHz, Chloroform-*d*)  $\delta$  220.1 (C), 151.5 (C), 134.2 (C), 125.6 (C), 114.8 (CH), 110.0 (CH), 56.4 (CH<sub>3</sub>), 55.7 (CH<sub>3</sub>), 52.5 (CH<sub>2</sub>), 42.7 (C), 36.5 (CH<sub>2</sub>), 35.1 (CH<sub>2</sub>), 26.4 (CH<sub>3</sub>), 16.0 (CH<sub>3</sub>)

\*The NMR data match with those reported in literature.<sup>7a</sup>

**HRMS** (ESI-TOF)  $m/z$  Calculated for C<sub>15</sub>H<sub>20</sub>O<sub>3</sub>Na [M+Na]<sup>+</sup>: 271.1310, found: 271.1314

$[\alpha]_D^{24} = +34.67$  ( $c$  0.54, CHCl<sub>3</sub>) for a 95% ee

Chiral HPLC analysis on a CHIRALPAK AS-H column, Hexane: *i*PrOH = 99: 1, 40 °C, flow = 1.0 ml/min, UV detection at 225 nm, retention times (min): 18 (minor) and 27.7 (major).

The absolute configuration was determined by comparison of the optical rotation with literature value.<sup>7a</sup>

**Racemic sample:**

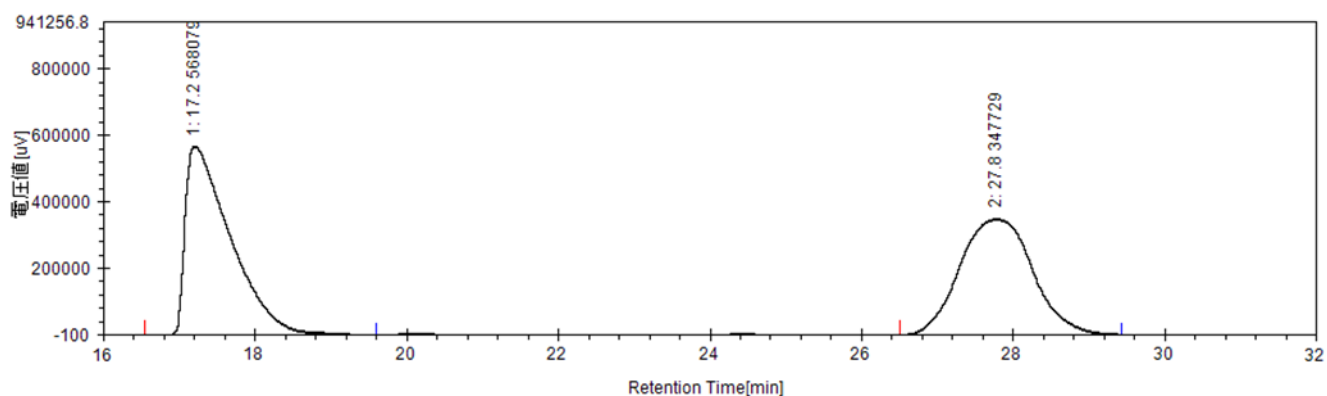

| Peak | Rt[min] | Height [uV] | Area [uV*min] | Area % | NTP    | Symmetry factor | Resolution |
|------|---------|-------------|---------------|--------|--------|-----------------|------------|
| 1    | 17.2    | 568079      | 390676.4      | 50.32  | 4142.9 | 3.079           | ***        |
| 2    | 27.8    | 347729      | 385708        | 49.68  | 3935   | 1.078           | 7.464      |

**Enantiomeric sample:**

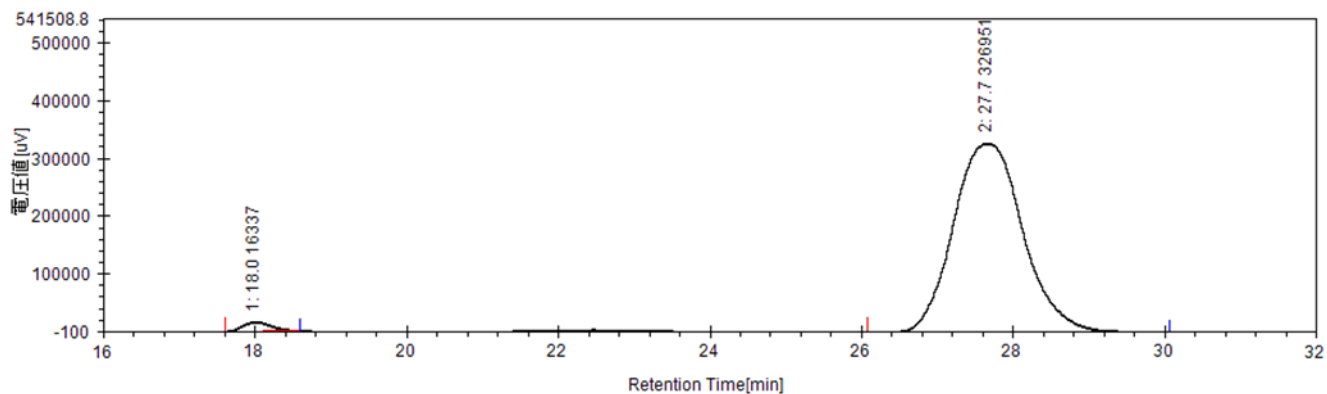

| Peak | Rt[min] | Height [uV] | Area [uV*min] | Area % | NTP     | Symmetry factor | Resolution |
|------|---------|-------------|---------------|--------|---------|-----------------|------------|
| 1    | 18      | 16337       | 7197.3        | 2.047  | 10270.6 | 1.254           | ***        |
| 2    | 27.7    | 326951      | 344450.9      | 97.953 | 4479.1  | 1.123           | 8.2        |



**(R)-3-(2,3-dimethoxy-5-methylphenyl)-3-methylcyclopentanone: 3g**<sup>7a, 8</sup>

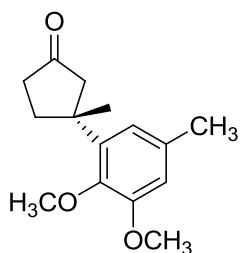

Synthesized according to General Procedure A from 3-Methyl-2-cyclopent-1-one **1a** (0.14 mmol, 13.4 mg) and 2,3-Dimethoxy-5-methyl phenyl boronic acid (0.28 mmol, 54.9 mg). The crude product was purified by flash chromatography (Hexane: AcOEt = 20: 1) to yield **3g** (25.4 mg, 78%, 98% ee) as a colorless oil.

**<sup>1</sup>H NMR** (400 MHz, Chloroform-*d*)  $\delta$  6.67 (d, *J* = 1.37 Hz, 1H), 6.60 (d, *J* = 1.37 Hz, 1H), 3.85 (s, 3H), 3.85 (s, 3H), 2.71 (d, *J* = 17.8 Hz, 1H), 2.55 (d, *J* = 17.8 Hz, 1H), 2.44 - 2.26 (m, 4H), 1.36 (s, 3H)

**<sup>13</sup>C NMR** (100 MHz, Chloroform-*d*)  $\delta$  219.9 (C), 153.0 (C), 145.4 (C), 141.3 (C), 133.1 (C), 118.9 (CH), 112.0 (CH), 60.5 (CH<sub>3</sub>), 55.8 (CH<sub>3</sub>), 52.8 (CH<sub>2</sub>), 43.0 (C), 36.3 (CH<sub>2</sub>), 35.4 (CH<sub>2</sub>), 27.2 (CH<sub>3</sub>), 21.6 (CH<sub>3</sub>)

\*The NMR data match with those reported in literature.<sup>7a, 8</sup>

**HRMS** (ESI-TOF) *m/z* Calculated for C<sub>15</sub>H<sub>20</sub>O<sub>3</sub>Na [M+Na]<sup>+</sup>: 271.1310, found: 271.1317

$[\alpha]_D^{23} = +47.98$  (*c* 0.65, CHCl<sub>3</sub>) for a 98% ee

Chiral HPLC analysis on a CHIRALPAK AS-H column, Hexane: *i*PrOH = 99: 1, 40 °C, flow = 1.0 ml/min, UV detection at 225 nm, retention times (min): 18.7 (major) and 21.8 (minor).

The absolute configuration was determined by comparison of the optical rotation with literature value.<sup>7a, 8</sup>

**Racemic sample:**

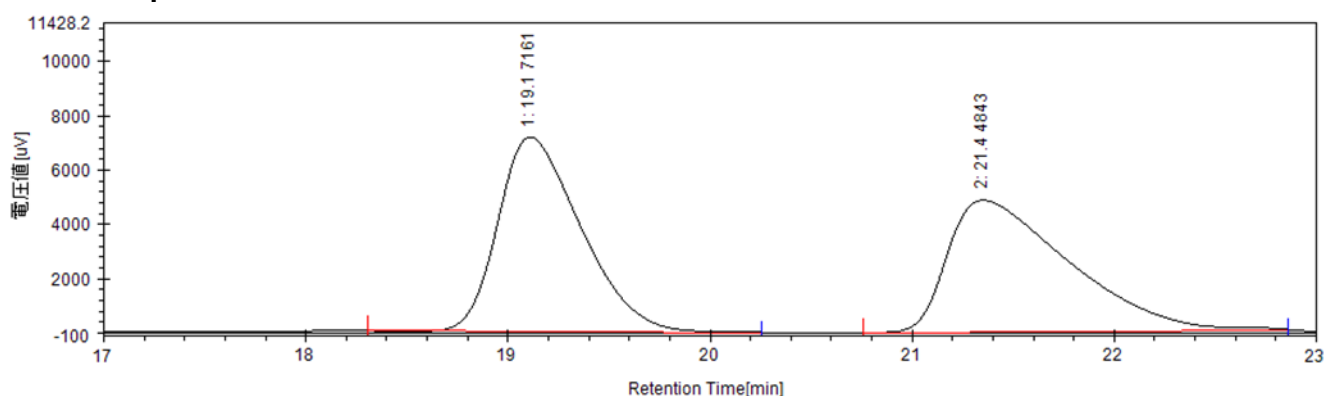

| Peak | Rt[min] | Height [uV] | Area [uV*min] | Area % | NTP     | Symmetry factor | Resolution |
|------|---------|-------------|---------------|--------|---------|-----------------|------------|
| 1    | 19.1    | 7161        | 3399.6        | 50.363 | 10374.1 | 1.383           | ***        |
| 2    | 21.4    | 4843        | 3350.6        | 49.637 | 6101.2  | 1.978           | 2.438      |

### Enantiomeric sample (3g):

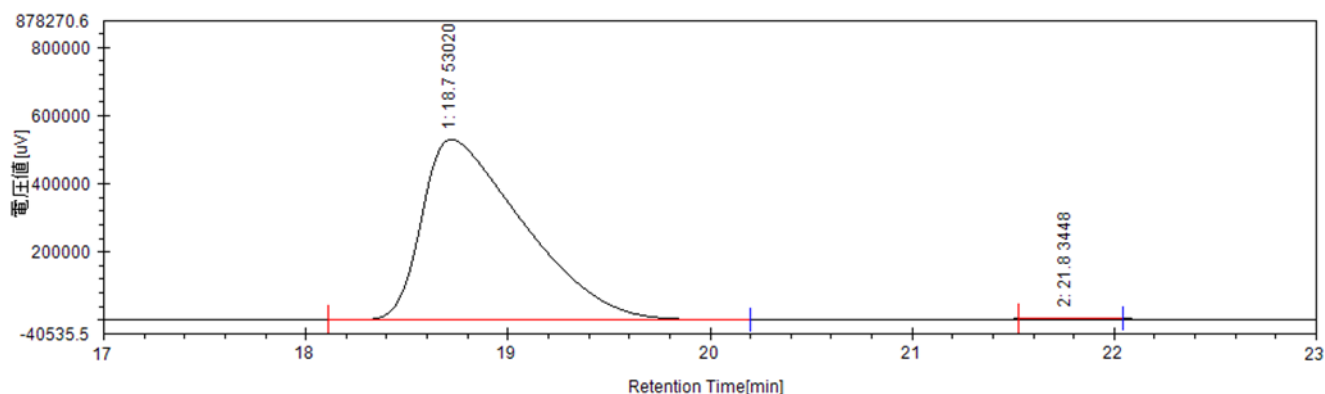

| Peak | Rt[min] | Height [uV] | Area [uV*min] | Area % | NTP     | Symmetry factor | Resolution |
|------|---------|-------------|---------------|--------|---------|-----------------|------------|
| 1    | 18.7    | 530205      | 307660        | 99.646 | 6609.4  | 1.949           | ***        |
| 2    | 21.8    | 3448        | 1092.2        | 0.354  | 24350.4 | 1.066           | 4.136      |

### (R)-3-ethyl-3-(2-methoxyphenyl) cyclopentanone: 3h

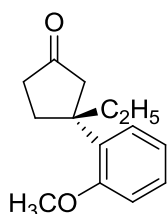

Synthesized according to General Procedure A from 3-Ethyl-2-cyclopentene-1-one (0.14 mmol, 15.4 mg) and 2-Methoxyphenyl boronic acid (0.28 mmol, 42.6 mg).

The crude product was purified by flash chromatography (Hexane: AcOEt = 20: 1) to yield **3h** (28.2 mg, 92%, 96% ee) as a colorless oil.

**<sup>1</sup>H NMR** (400 MHz, Chloroform-*d*)  $\delta$  7.25 - 7.20 (m, 1H), 7.12 - 7.10 (m, 1H), 6.94 - 6.88 (m, 2H), 3.81 (s, 3H), 2.75 (d,  $J$  = 18.3 Hz, 1H), 2.60 (d,  $J$  = 18.3 Hz, 1H), 2.58 - 2.23 (m, 4H), 1.90 - 1.72 (m, 2H), 0.62 (t,  $J$  = 7.32 Hz, 3H)

**<sup>13</sup>C NMR** (100 MHz, Chloroform-*d*)  $\delta$  220.2 (C), 157.9 (C), 133.6 (C), 128.2 (CH), 127.8 (CH), 120.3 (CH), 111.4 (CH), 55.1 (CH<sub>3</sub>), 51.5 (CH<sub>2</sub>), 47.1 (C), 36.1 (CH<sub>2</sub>), 32.3 (CH<sub>2</sub>), 29.7 (CH<sub>2</sub>), 9.6 (CH<sub>3</sub>)

**HRMS** (ESI-TOF)  $m/z$  Calculated for C<sub>14</sub>H<sub>18</sub>O<sub>2</sub>Na [M+Na]<sup>+</sup>: 241.1204, found: 241.1205

$[\alpha]_D^{26} = +24.5$  (c 0.20, CHCl<sub>3</sub>) for a 96% ee

Chiral HPLC analysis on a CHIRALPAK OJ-H column, Hexane: *i*PrOH = 99: 1, 40 °C, flow = 0.5 ml/min, UV detection at 210 nm, retention times (min): 21.5 (major) and 27 (minor).

**Racemic sample:**

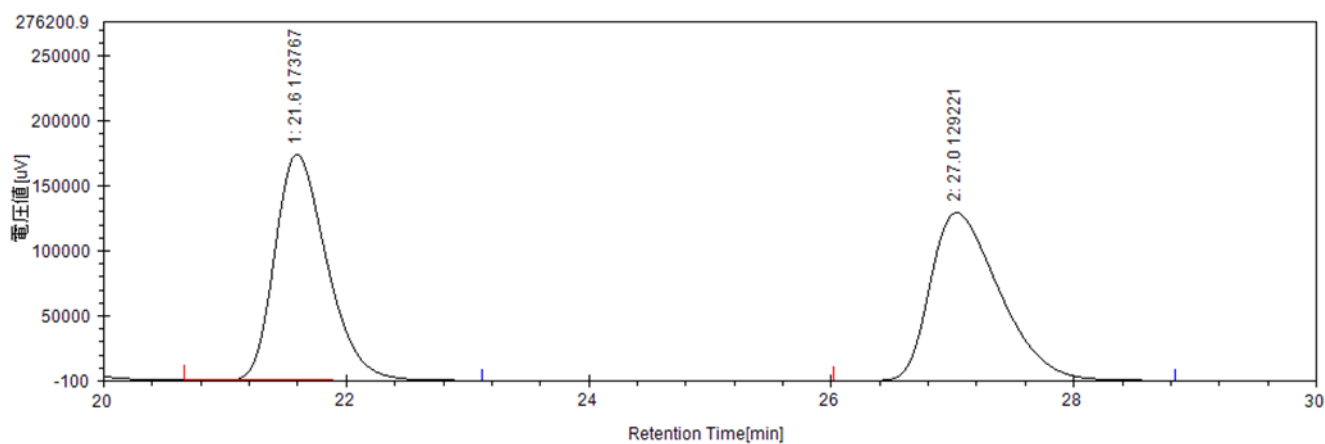

| Peak | Rt[min] | Height [uV] | Area [uV*min] | Area % | NTP     | Symmetry factor | Resolution |
|------|---------|-------------|---------------|--------|---------|-----------------|------------|
| 1    | 21.6    | 173767      | 86026.7       | 50.196 | 12353.3 | 1.305           | ***        |
| 2    | 27      | 129221      | 85354.8       | 49.804 | 10710.4 | 1.481           | 5.989      |

**Enantiomeric sample (3h):**

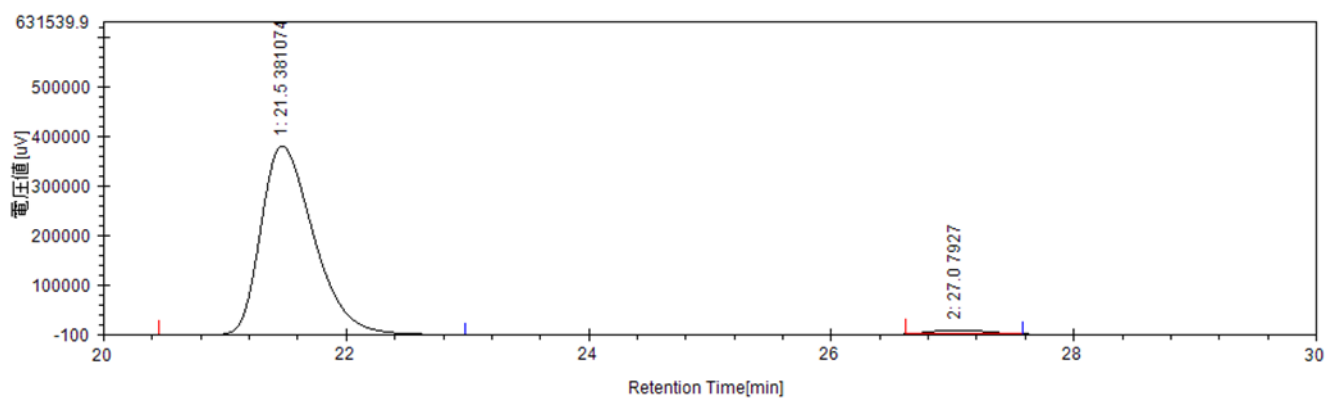

| Peak | Rt[min] | Height [uV] | Area [uV*min] | Area % | NTP     | Symmetry factor | Resolution |
|------|---------|-------------|---------------|--------|---------|-----------------|------------|
| 1    | 21.5    | 381074      | 191570.3      | 97.914 | 11905.7 | 1.392           | ***        |
| 2    | 27      | 7927        | 4081.8        | 2.086  | 15497.5 | 1.147           | 6.731      |

### (S)-methyl 1-(2-methoxyphenyl)-3-oxocyclopentanecarboxylate: **3i**

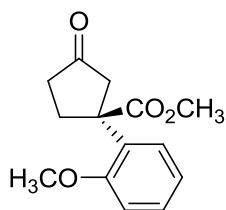

Synthesized according to General Procedure A from Methyl-3-oxocyclopent-2-enecarboxylate (0.14 mmol, 19.6 mg) and 2-Methoxyphenyl boronic acid (0.28 mmol, 42.6 mg). The crude product was purified by flash chromatography (Hexane: AcOEt = 20: 1) to yield **3i** (31.6 mg, 91%, 93% ee) as a white solid.  
m.p. = 129 - 130 °C

**<sup>1</sup>H NMR** (400 MHz, Chloroform-*d*) δ 7.32 - 7.22 (m, 2H), 7.00 - 6.96 (m, 1H), 6.91 - 6.89 (m, 1H), 3.79 (s, 3H), 3.64 (s, 3H), 3.19 (d, *J* = 18.7 Hz, 1H), 2.44 (d, *J* = 17.8 Hz, 1H), 2.68 - 2.26 (m, 4H),

**<sup>13</sup>C NMR** (100 MHz, Chloroform-*d*) δ 216.6 (C), 176.1 (C), 157.2 (C), 130.2 (C), 128.9 (CH), 125.9 (CH), 120.7 (CH), 111.1 (CH), 55.4 (CH<sub>3</sub>), 52.5 (CH<sub>3</sub>), 52.0 (C), 48.7 (CH<sub>2</sub>), 36.1 (CH<sub>2</sub>), 31.2 (CH<sub>2</sub>)

**HRMS** (ESI-TOF) *m/z* Calculated for C<sub>14</sub>H<sub>16</sub>O<sub>4</sub>Na [M+Na]<sup>+</sup>: 271.0946, found: 271.0957

[α]<sub>D</sub><sup>24</sup> = +39.9 (*c* 0.34, CHCl<sub>3</sub>) for a 93% ee

Chiral HPLC analysis on a CHIRALPAK AD-H column, Hexane: *i*PrOH = 99: 1, 40 °C, flow = 1.0 ml/min, UV detection at 210 nm, retention times (min): 22.2 (major) and 25.7 (minor).

### Racemic sample:

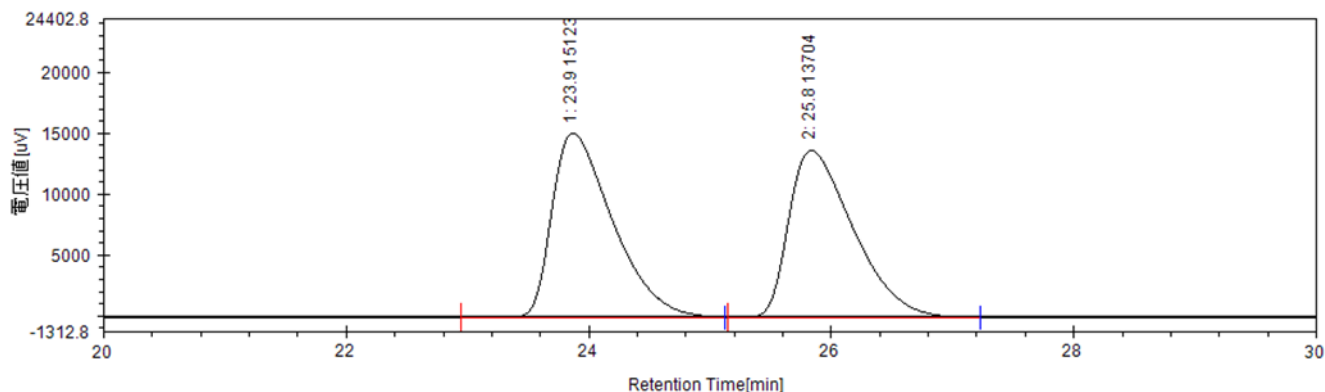

| Peak | Rt[min] | Height [uV] | Area [uV*min] | Area % | NTP     | Symmetry factor | Resolution |
|------|---------|-------------|---------------|--------|---------|-----------------|------------|
| 1    | 23.9    | 15123       | 8729          | 50.855 | 11077.5 | 1.71            | ***        |
| 2    | 25.8    | 13704       | 8435.4        | 49.145 | 11239.2 | 1.67            | 2.096      |

### Enantiomeric sample (3i):

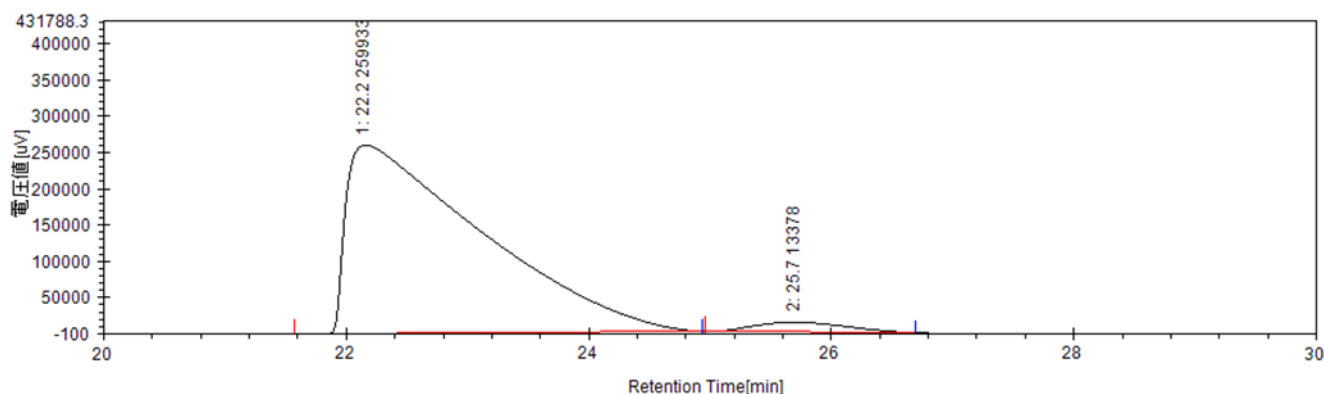

| Peak | Rt[min] | Height [uV] | Area [uV*min] | Area % | NTP    | Symmetry factor | Resolution |
|------|---------|-------------|---------------|--------|--------|-----------------|------------|
| 1    | 22.2    | 259933      | 334642.1      | 96.61  | 1844.2 | 5.183           | ***        |
| 2    | 25.7    | 13378       | 11741.3       | 3.39   | 4779.4 | 1.225           | 2          |

### (S)-methyl 1-(2-methoxy-5-methylphenyl)-3-oxocyclopentanecarboxylate: **3j**

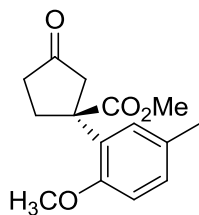

Synthesized according to General Procedure A from Methyl-3-oxocyclopent-2-enecarboxylate (0.14 mmol, 19.6 mg) and 2-Methoxy-4-methyl phenyl boronic acid (0.28 mmol, 46.5 mg). The crude product was purified by flash chromatography (Hexane: AcOEt = 20: 1) to yield **3j** (36.7 mg, 96%, 97% ee) as a pale-yellow oil.

**<sup>1</sup>H NMR** (400 MHz, Chloroform-*d*)  $\delta$  7.09 (d,  $J$  = 9.2 Hz, 1H), 7.01 (s, 1H), 6.78 (d,  $J$  = 8.2 Hz, 1H), 3.76 (s, 3H), 3.64 (s, 3H), 3.17 (d,  $J$  = 18.3 Hz, 1H), 2.66 - 2.25 (m, 4H), 2.43 (d,  $J$  = 18.3 Hz, 1H), 2.31 (s, 3H)

**<sup>13</sup>C NMR** (100 MHz, Chloroform-*d*)  $\delta$  216.6 (C), 176.2 (C), 155.1 (C), 129.9 (C), 129.8 (C), 129.0 (CH), 126.7 (CH), 111.1 (CH), 55.5 (CH<sub>3</sub>), 52.5 (CH<sub>3</sub>), 52.0 (C), 48.8 (CH<sub>2</sub>), 36.2 (CH<sub>2</sub>), 31.2 (CH<sub>2</sub>), 20.9 (CH<sub>3</sub>)

**HRMS** (ESI-TOF)  $m/z$  Calculated for C<sub>15</sub>H<sub>18</sub>O<sub>4</sub>Na [M+Na]<sup>+</sup>: 285.1103, found: 229.1104

$[\alpha]_D^{24}$  = +58.3 ( $c$  0.23, CHCl<sub>3</sub>) for a 97% ee

Chiral HPLC analysis on a CHIRALPAK OJ-H column, Hexane: *i*PrOH = 99: 1, 40 °C, flow = 0.5 ml/min, UV detection at 210 nm, retention times (min): 65.5 (minor) and 72.4 (major).

**Racemic sample:**

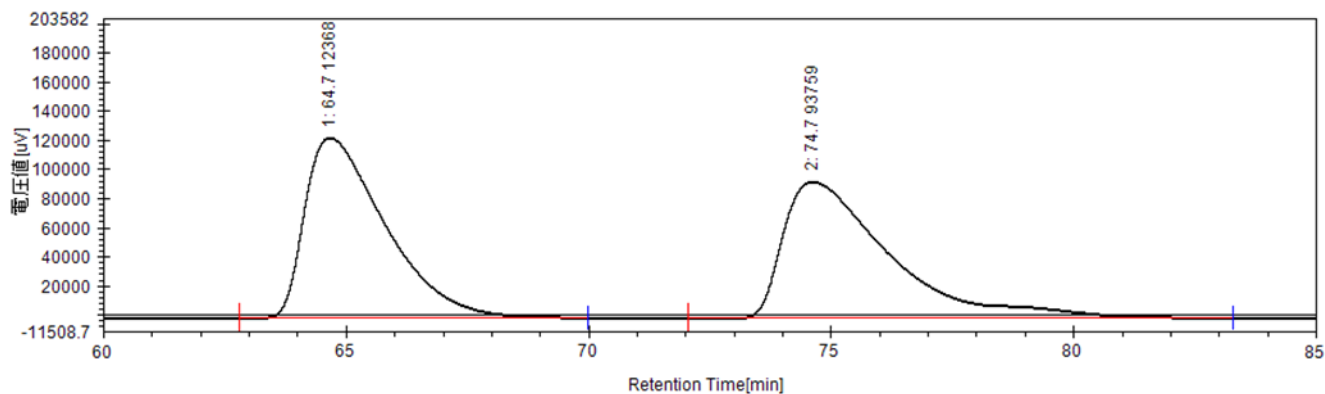

| Peak | Rt [min] | Height [uV] | Area [uV*min] | Area % | NTP    | Symmetry factor | Resolution |
|------|----------|-------------|---------------|--------|--------|-----------------|------------|
| 1    | 64.7     | 123686      | 236223.7      | 50.015 | 7545.8 | 1.983           | ***        |
| 2    | 74.7     | 93759       | 236079.2      | 49.985 | 6566.9 | 2.791           | 2.999      |

**Enantiomeric sample (3j):**

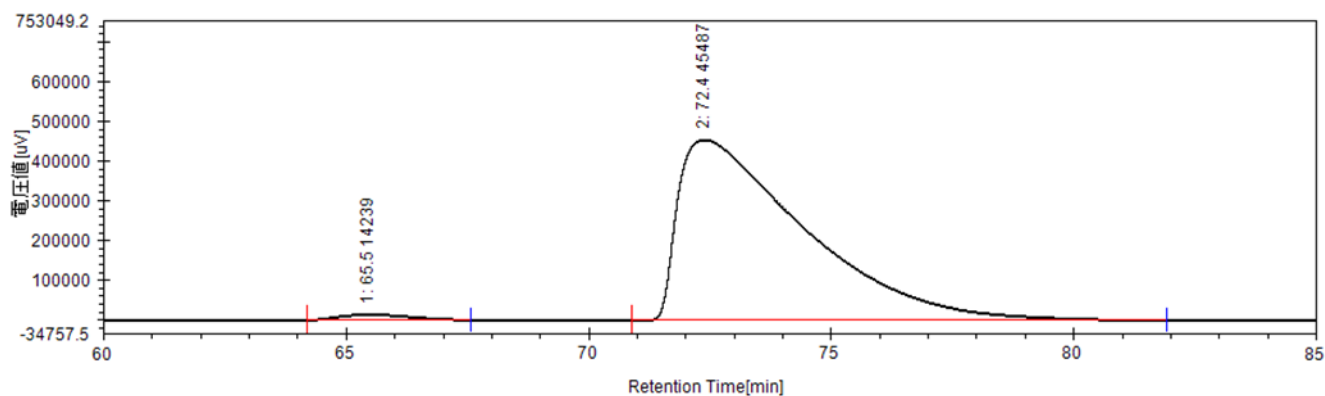

| Peak | Rt [min] | Height [uV] | Area [uV*min] | Area % | NTP    | Symmetry factor | Resolution |
|------|----------|-------------|---------------|--------|--------|-----------------|------------|
| 1    | 65.5     | 14239       | 24037.9       | 1.719  | 8776   | 1.328           | ***        |
| 2    | 72.4     | 454879      | 1374490       | 98.281 | 3911.1 | 3.553           | 1.874      |

**(R)-3-(2-methoxyphenyl)-3-methylcyclohexanone: 3k<sup>7</sup>**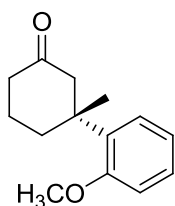

Synthesized according to General Procedure A from 3-Methyl-2-cyclohexen-1-one **1b** (0.14 mmol, 15.4 mg) and 2-Methoxyphenyl boronic acid (0.28 mmol, 42.6 mg).

The crude product was purified by flash chromatography (Hexane: AcOEt = 20: 1) to yield **3k** (15.6 mg, 51%, 83% ee) as a colorless oil.

<sup>1</sup>H NMR (400 MHz, Chloroform-*d*) δ 7.26 - 7.20 (m, 2H), 6.95 - 6.84 (m, 2H), 3.84 (s, 3H), 3.00 (d, *J* = 14.2 Hz, 1H), 2.62 - 2.54 (m, 1H), 2.45 (d, *J* = 14.2 Hz, 1H), 2.36 - 2.25 (m, 2H), 1.92 - 1.80 (m, 2H), 1.70 - 1.61 (m, 1H), 1.40 (s, 3H)

<sup>13</sup>C NMR (100 MHz, Chloroform-*d*) δ 212.6 (C), 157.9 (C), 134.9 (C), 127.8 (CH), 127.5 (CH), 120.7 (CH), 111.9 (CH), 55.0 (CH<sub>3</sub>), 53.4 (CH<sub>2</sub>), 42.9 (C), 41.0 (CH<sub>2</sub>), 35.1 (CH<sub>2</sub>), 26.4 (CH<sub>3</sub>), 22.2 (CH<sub>2</sub>)

\*The NMR data match with those reported in literature.<sup>7</sup>

HRMS (ESI-TOF) *m/z* Calculated for C<sub>14</sub>H<sub>18</sub>O<sub>2</sub>Na [M+Na]<sup>+</sup>: 241.1204, found: 241.1205

[α]<sub>D</sub><sup>23</sup> = -49.6 (c 0.54, CHCl<sub>3</sub>) for a 83% ee

Chiral HPLC analysis on a CHIRALPAK OD-H column, Hexane: *i*PrOH = 99: 1, 40 °C, flow = 1.0 ml/min, UV detection at 254 nm, retention times (min): 10.8 (minor) and 11.7 (major).

The absolute configuration was determined by comparison of the optical rotation with literature value.<sup>7</sup>

**Racemic sample:**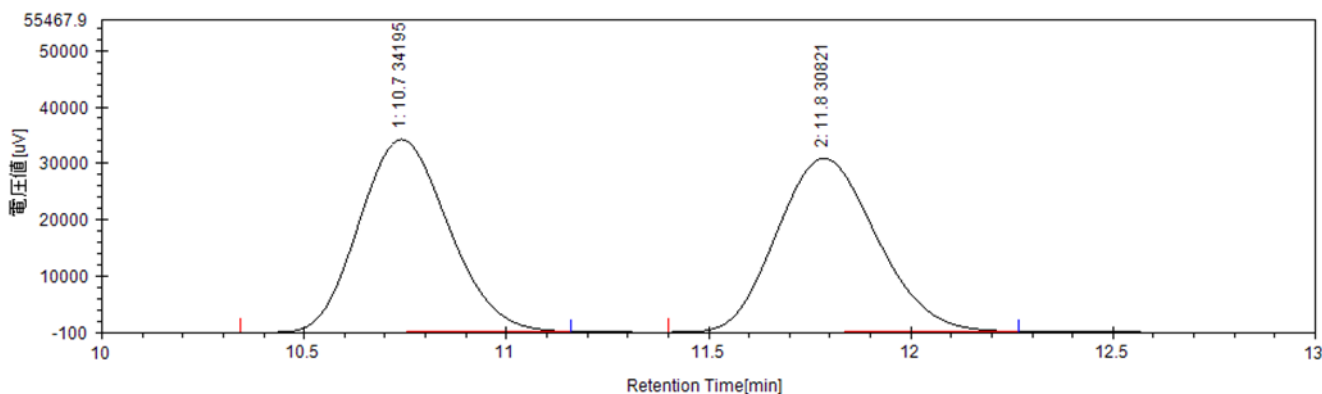

| Peak | Rt [min] | Height [uV] | Area [uV*min] | Area % | NTP     | Symmetry factor | Resolution |
|------|----------|-------------|---------------|--------|---------|-----------------|------------|
| 1    | 10.7     | 34195       | 8730.6        | 49.803 | 10998.2 | 1.126           | ***        |
| 2    | 11.8     | 30821       | 8799.7        | 50.197 | 10566.5 | 1.144           | 2.406      |

### Enantiomeric sample (3k):

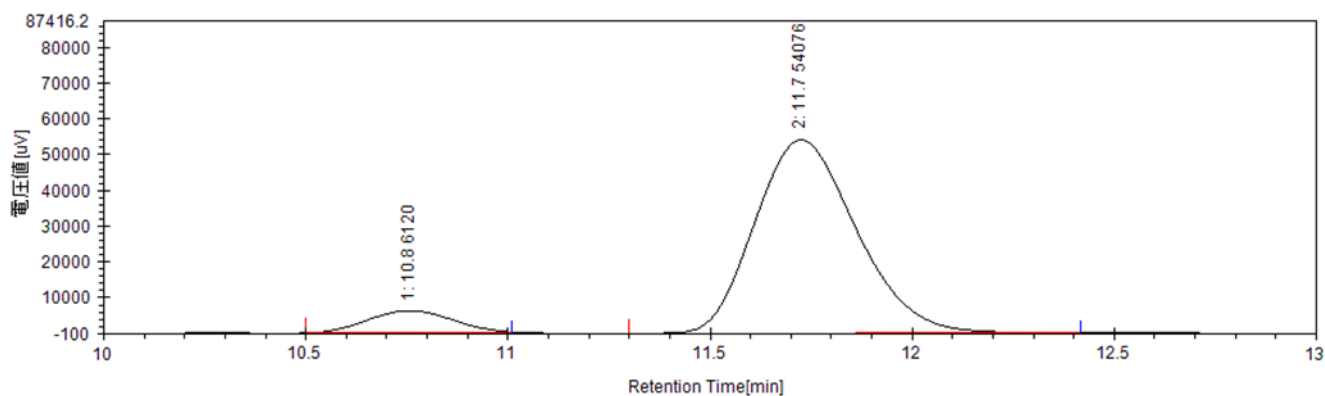

| Peak | Rt [min] | Height [uV] | Area [uV*min] | Area % | NTP     | Symmetry factor | Resolution |
|------|----------|-------------|---------------|--------|---------|-----------------|------------|
| 1    | 10.8     | 6120        | 1468.3        | 8.56   | 11817.3 | 1.008           | ***        |
| 2    | 11.7     | 54076       | 15685.1       | 91.44  | 10269.2 | 1.204           | 2.258      |

### (R)-3-(2-methoxyphenyl)-3-methylcycloheptanone: **3I**

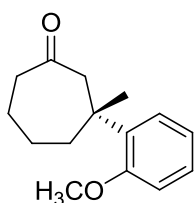

Synthesized according to General Procedure A from 3-Methyl-2-cyclohepten-1-one **1c** (0.14 mmol, 17.4 mg) and 2-Methoxyphenyl boronic acid (0.28 mmol, 42.6 mg). The crude product was purified by flash chromatography (Hexane: AcOEt = 20: 1) to yield **3I** (25.0 mg, 77%, 99% ee) as a colorless oil.

**<sup>1</sup>H NMR** (400 MHz, Chloroform-*d*)  $\delta$  7.25 - 7.20 (m, 2H), 6.95 - 6.89 (m, 2H), 3.83 (s, 3H), 2.67 (d,  $J$  = 18.3 Hz, 1H), 2.60 (d,  $J$  = 18.3 Hz, 1H), 2.45 - 2.30 (m, 4H), 1.39 (s, 3H)

**<sup>13</sup>C NMR** (100 MHz, Chloroform-*d*)  $\delta$  214.0 (C), 148.0 (C), 128.7 (CH), 128.6 (CH), 126.1 (CH), 125.7 (CH), 55.7 (CH<sub>2</sub>), 44.3 (CH<sub>2</sub>), 43.5 (CH<sub>2</sub>), 39.9 (C), 32.0 (CH<sub>3</sub>), 25.9 (CH<sub>2</sub>), 24.0 (CH<sub>2</sub>)

**HRMS** (ESI-TOF)  $m/z$  Calculated for C<sub>15</sub>H<sub>20</sub>O<sub>2</sub>Na [M+Na]<sup>+</sup>: 255.1361, found: 255.1373

$[\alpha]_D^{26}$  = -63.7 (c 0.37, CHCl<sub>3</sub>) for a 99% ee

Chiral HPLC analysis on a CHIRALPAK OD-H column, Hexane: *i*PrOH = 99: 1, 40 °C, flow = 1.0 ml/min, UV detection at 210 nm, retention times (min): 10.7 (major) and 13.3 (minor).



### Racemic sample:

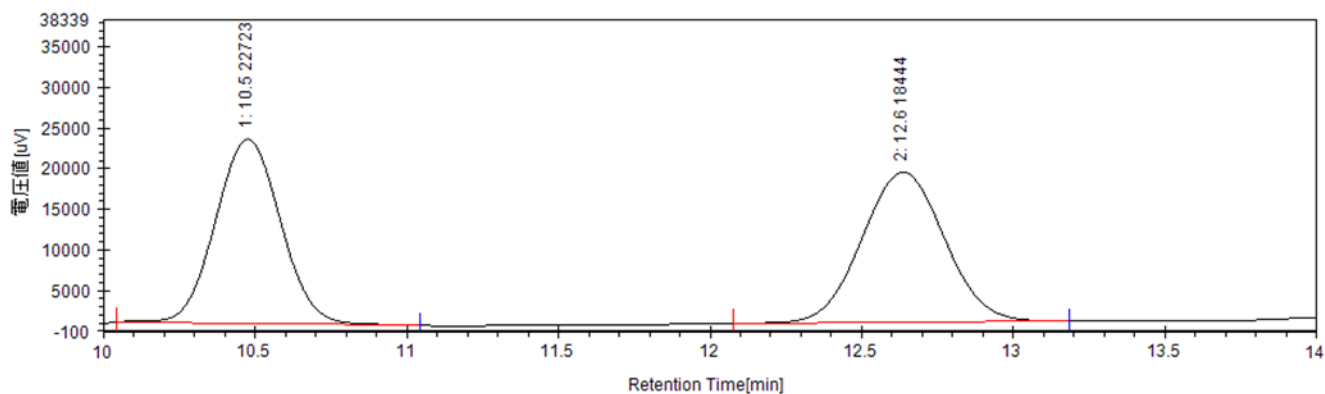

| Peak | Rt [min] | Height [uV] | Area [uV*min] | Area % | NTP     | Symmetry factor | Resolution |
|------|----------|-------------|---------------|--------|---------|-----------------|------------|
| 1    | 10.5     | 22723       | 5658.2        | 49.224 | 11210.2 | 1.043           | ***        |
| 2    | 12.6     | 18444       | 5836.5        | 50.776 | 9986.1  | 1.047           | 4.802      |

### Enantiomeric sample (3l):

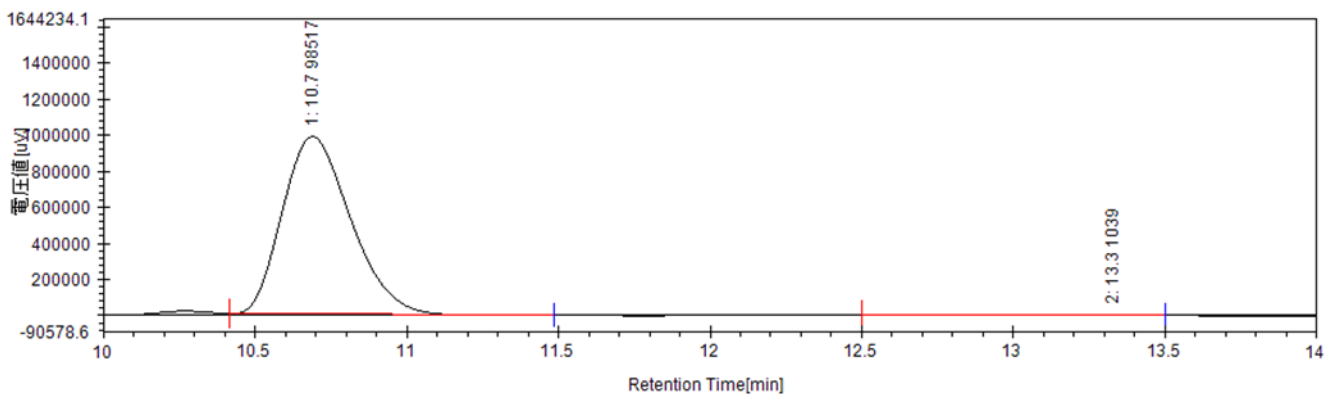

| Peak | Rt [min] | Height [uV] | Area [uV*min] | Area % | NTP     | Symmetry factor | Resolution |
|------|----------|-------------|---------------|--------|---------|-----------------|------------|
| 1    | 10.7     | 985172      | 257291.6      | 99.771 | 10515.2 | 1.245           | ***        |
| 2    | 13.3     | 1039        | 590.5         | 0.229  | 8034.7  | 0.6             | 5.234      |

### (R)-3-methyl-3-phenylcyclopentanone: 3n<sup>9</sup>

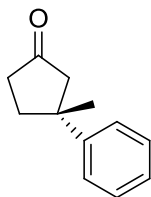

Synthesized according to General Procedure A from 3-Methyl-2-cyclopentanone **1a** (0.14 mmol, 13.4 mg) and Phenyl boronic acid (0.28 mmol, 34.2 mg). The crude product was purified by flash chromatography (Hexane: AcOEt = 20: 1) to yield **3n** (22.5 mg, 92%, 99% ee) as a colorless oil.

**<sup>1</sup>H NMR** (400 MHz, Chloroform-*d*)  $\delta$  7.37 - 7.28 (m, 4H), 7.26 - 7.18 (m, 1H), 2.88 (d, *J* = 14.2 Hz, 1H), 2.44 (d, *J* = 14.2 Hz, 1H), 2.37 - 2.28 (m, 2H), 2.26 - 2.13 (m, 1H), 1.96 - 1.83 (m, 2H), 1.72 - 1.62 (m, 1H), 1.32 (s, 3H)

**<sup>13</sup>C NMR** (100 MHz, Chloroform-*d*)  $\delta$  218.6 (C), 148.6 (C), 128.7 (CH), 126.4 (CH), 125.6 (CH), 52.3 (CH<sub>2</sub>), 43.9 (C), 36.8 (CH<sub>2</sub>), 35.9 (CH<sub>2</sub>), 29.5 (CH<sub>3</sub>)

\*The NMR data match with those reported in literature.<sup>9</sup>

**HRMS** (ESI-TOF) *m/z* Calculated for C<sub>12</sub>H<sub>14</sub>ONa [M+Na]<sup>+</sup>: 197.0942, found: 197.0932

$[\alpha]_D^{23} = +23.95$  (c 0.17, CHCl<sub>3</sub>) for a 99% ee (Lit.<sup>9</sup>  $[\alpha]_D^{20} = -22.0$  (c 0.57, CHCl<sub>3</sub>) for a 72% ee)

Chiral HPLC analysis on a CHIRALPAK AD-H column, Hexane: *i*PrOH = 99: 1, 40 °C, flow = 0.5 ml/min, UV detection at 254 nm, retention times (min): 20.7 (minor) and 25.5 (major).

The absolute configuration was determined by comparison of the optical rotation with literature value.<sup>9</sup>

#### Racemic sample:

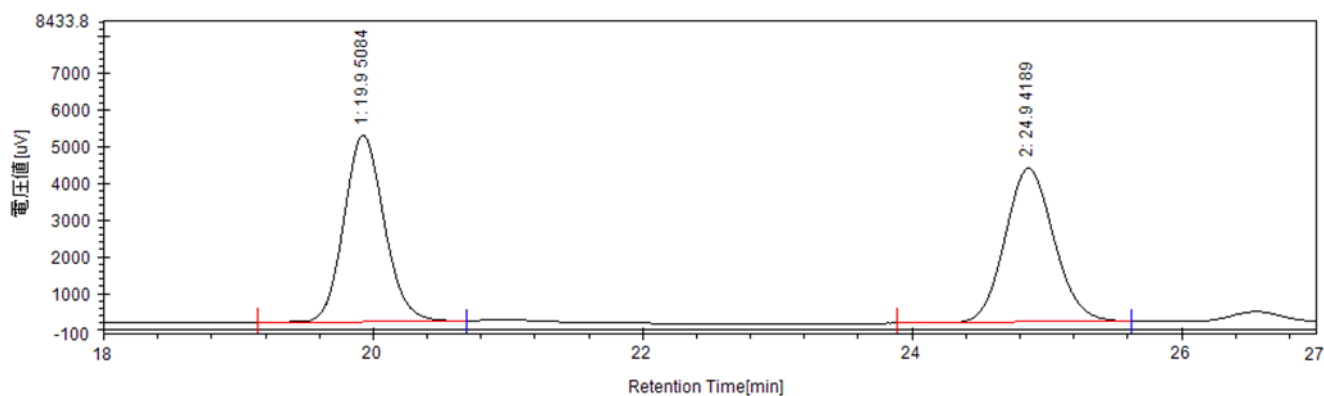

| Peak | Rt[min] | Height [uV] | Area [uV*min] | Area % | NTP     | Symmetry factor | Resolution |
|------|---------|-------------|---------------|--------|---------|-----------------|------------|
| 1    | 19.9    | 5081        | 1742.5        | 49.971 | 21835.4 | 1.117           | ***        |
| 2    | 24.9    | 4178        | 1744.5        | 50.029 | 22616.3 | 1.084           | 8.253      |

### Enantiomeric sample (3n):

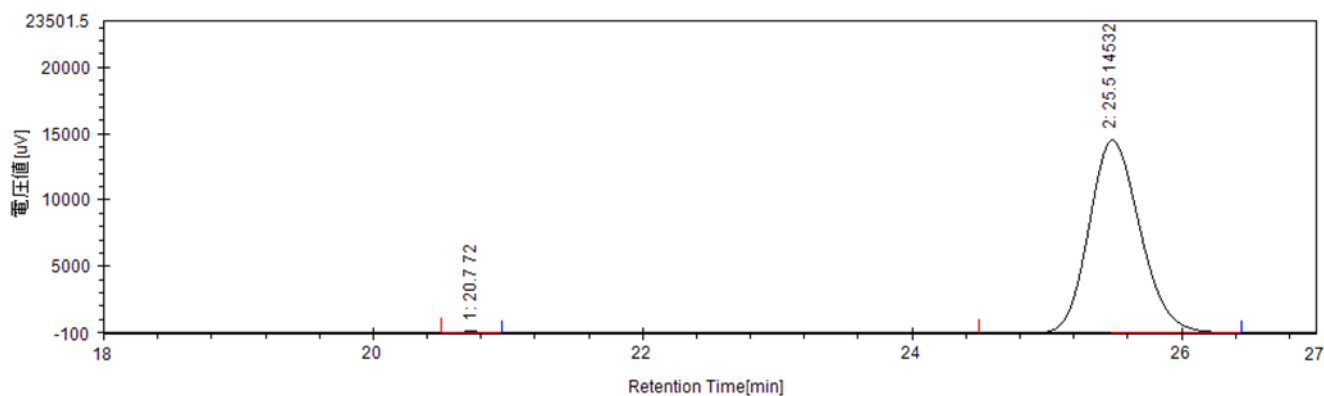

| Peak | Rt[min] | Height [uV] | Area [uV*min] | Area % | NTP     | Symmetry factor | Resolution |
|------|---------|-------------|---------------|--------|---------|-----------------|------------|
| 1    | 20.7    | 72          | 19            | 0.297  | 35243.3 | 0.985           | ***        |
| 2    | 25.5    | 14532       | 6369.3        | 99.703 | 21827.3 | 1.175           | 8.417      |

### (R)-3-(3-methoxyphenyl)-3-methylcyclopentanone: **3o**

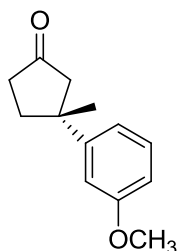

Synthesized according to General Procedure A from 3-Methyl-2-cyclopent-1-one **1a** (0.14 mmol, 13.4 mg) and 3-Methoxyphenyl boronic acid (0.28 mmol, 42.6 mg). The crude product was purified by flash chromatography (Hexane: AcOEt = 20: 1) to yield **3o** (26.8 mg, 94%, 99% ee) as a colorless oil.

**<sup>1</sup>H NMR** (400 MHz, Chloroform-*d*)  $\delta$  7.29 - 7.25 (m, 1H), 6.89 - 6.77 (m, 3H), 3.82 (s, 3H), 2.64 (d,  $J$  = 17.8 Hz, 1H), 2.45 (d,  $J$  = 17.8 Hz, 1H), 2.45 - 2.20 (m, 4H), 1.38 (s, 3H)

**<sup>13</sup>C NMR** (100 MHz, Chloroform-*d*)  $\delta$  218.5 (C), 159.8 (C), 150.3 (C), 129.6 (CH), 118.0 (CH), 112.3 (CH), 110.9 (CH), 55.3 (CH<sub>3</sub>), 52.3 (CH<sub>2</sub>), 43.9 (C), 36.8 (CH<sub>2</sub>), 35.8 (CH<sub>2</sub>), 29.4 (CH<sub>3</sub>)

**HRMS** (ESI-TOF)  $m/z$  Calculated for C<sub>13</sub>H<sub>16</sub>O<sub>2</sub>Na [M+Na]<sup>+</sup>: 227.1048, found: 227.1048

$[\alpha]_D^{23}$  = -18.53 (c 0.415, CHCl<sub>3</sub>) for a 99% ee

Chiral HPLC analysis on a CHIRALPAK AD-H column, Hexane: *i*PrOH = 9: 1, 40 °C, flow = 0.5 ml/min, UV detection at 225 nm, retention times (min): 11.5 (minor) and 14.1 (major).

**Racemic sample:**

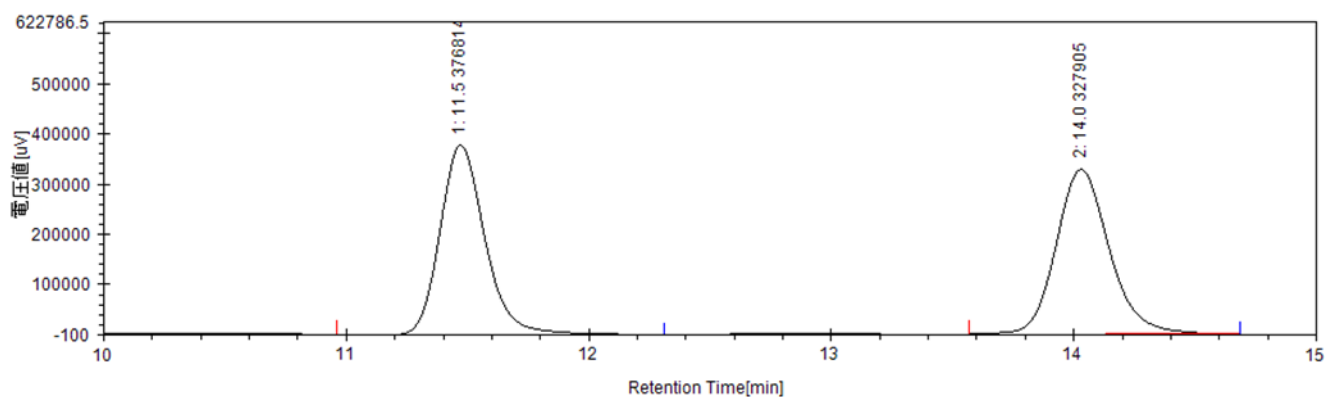

| Peak | Rt [min] | Height [uV] | Area [uV*min] | Area % | NTP     | Symmetry factor | Resolution |
|------|----------|-------------|---------------|--------|---------|-----------------|------------|
| 1    | 11.5     | 376814      | 80520.8       | 49.107 | 19626.2 | 1.182           | ***        |
| 2    | 14       | 327905      | 83449.2       | 50.893 | 20768.3 | 1.154           | 7.154      |

**Enantiomeric sample (3o):**

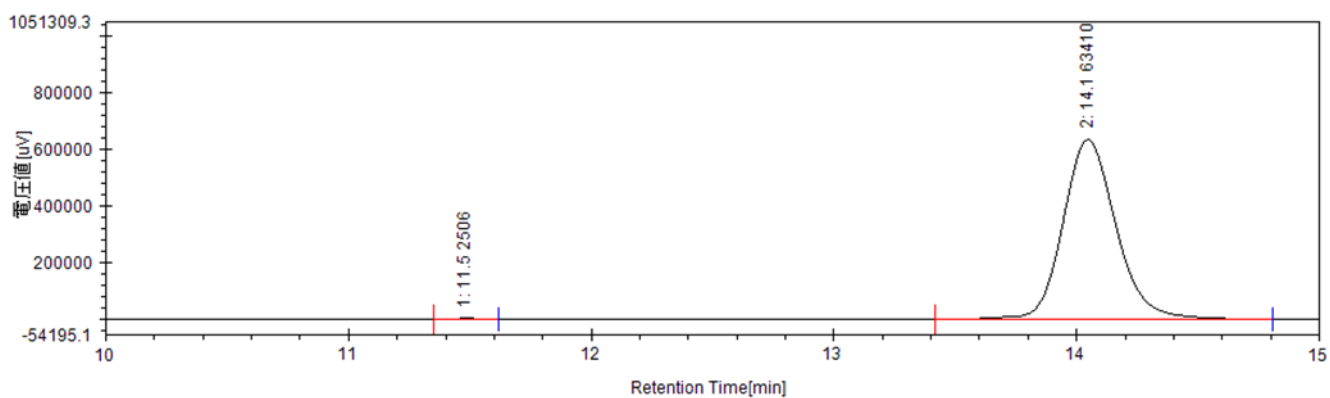

| Peak | Rt [min] | Height [uV] | Area [uV*min] | Area % | NTP     | Symmetry factor | Resolution |
|------|----------|-------------|---------------|--------|---------|-----------------|------------|
| 1    | 11.5     | 2506        | 382.1         | 0.237  | 30544.4 | 1.006           | ***        |
| 2    | 14.1     | 634102      | 160846.2      | 99.763 | 21059.1 | 1.142           | 7.917      |

**(R)-3-(4-methoxyphenyl)-3-methylcyclopentanone: 3p<sup>7b</sup>**

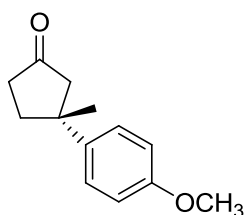

Synthesized according to General Procedure A from 3-Methyl-2-cyclopent-1-one **1a** (0.14 mmol, 13.4 mg) and 4-Methoxyphenyl boronic acid (0.28 mmol, 42.6 mg). The crude product was purified by flash chromatography (Hexane: AcOEt = 20: 1) to yield **3p** (27.1 mg, 95%, 99% ee) as a colorless oil.

**<sup>1</sup>H NMR** (400 MHz, Chloroform-*d*)  $\delta$  7.24 - 7.19 (m, 2H), 6.90 - 6.84 (m, 2H), 3.80 (s, 3H), 2.63 (d, *J* = 17.8 Hz, 1H), 2.46 - 2.19 (m, 5H), 1.37 (s, 3H)

**<sup>13</sup>C NMR** (100 MHz, Chloroform-*d*)  $\delta$  218.8 (C), 158.0 (C), 140.6 (C), 126.5 (CH), 114.0 (CH), 55.4 (CH<sub>3</sub>), 52.6 (CH<sub>2</sub>), 43.3 (C), 36.9 (CH<sub>2</sub>), 36.2 (CH<sub>2</sub>), 29.6 (CH<sub>3</sub>)

\*The NMR data match with those reported in literature.<sup>7b</sup>

**HRMS** (ESI-TOF) *m/z* Calculated for C<sub>13</sub>H<sub>16</sub>O<sub>2</sub>Na [M+Na]<sup>+</sup>: 227.1048, found: 227.1043

$[\alpha]_D^{23}$  = +3.57 (c 0.56, CHCl<sub>3</sub>) for a 99% ee

Chiral HPLC analysis on a CHIRALPAK OJ-H column, Hexane: *i*PrOH = 9: 1, 40 °C, flow = 0.5 ml/min, UV detection at 225 nm, retention times (min): 23.7 (minor) and 25.3 (major).

The absolute configuration was determined by comparison of the optical rotation with literature value.<sup>7b</sup>

**Racemic sample:**

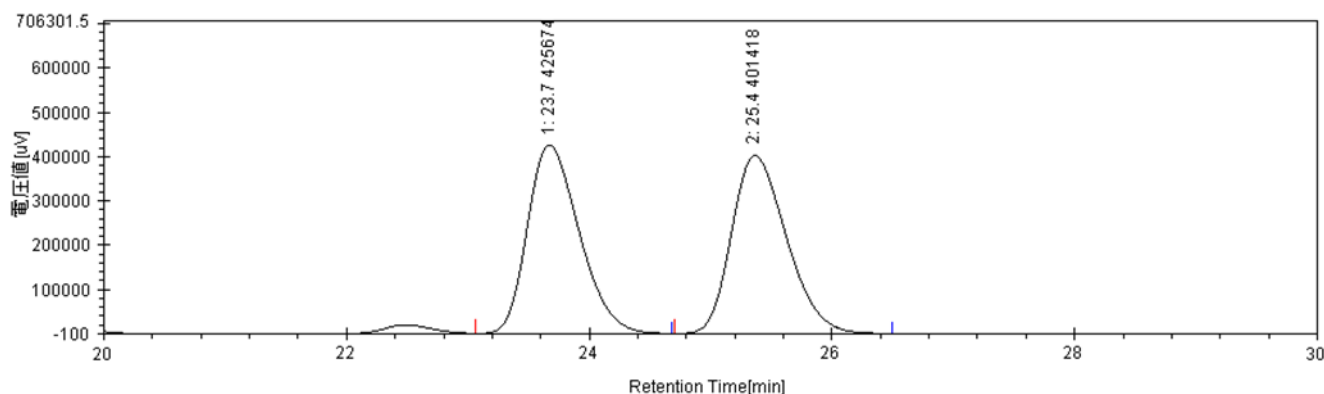

| Peak | Rt[min] | Height [uV] | Area [uV*min] | Area % | NTP     | Symmetry factor | Resolution |
|------|---------|-------------|---------------|--------|---------|-----------------|------------|
| 1    | 23.7    | 425674      | 209974.7      | 49.976 | 14615.2 | 1.276           | ***        |
| 2    | 25.4    | 401418      | 210180.1      | 50.024 | 14893.9 | 1.271           | 2.101      |

### Enantiomeric sample (3p):

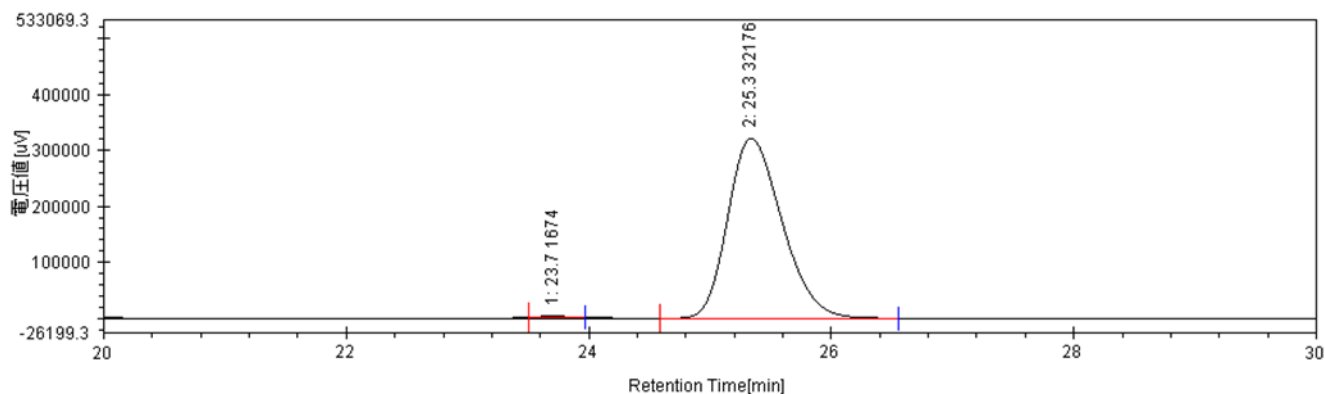

| Peak | Rt[min] | Height [uV] | Area [uV*min] | Area % | NTP     | Symmetry factor | Resolution |
|------|---------|-------------|---------------|--------|---------|-----------------|------------|
| 1    | 23.7    | 1674        | 476.8         | 0.286  | 35973.3 | 1.114           | ***        |
| 2    | 25.3    | 321760      | 165957.2      | 99.714 | 15383.9 | 1.246           | 2.487      |

### (R)-3-(4-hydroxyphenyl)-3-methylcyclopentanone: 3q

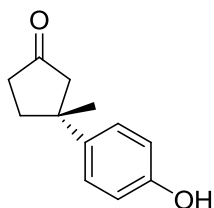

Synthesized according to General Procedure A from 3-Methyl-2-cyclopent-1-one **1a** (0.14 mmol, 13.4 mg) and 4-Hydroxyphenyl boronic acid (0.28 mmol, 38.6 mg). The crude product was purified by flash chromatography (Hexane: AcOEt = 5: 1) to yield **3q** (23.4 mg, 88%, 95% ee) as a white solid.

m.p. = 89 - 90 °C

**<sup>1</sup>H NMR** (400 MHz, Chloroform-*d*)  $\delta$  7.15 (d, *J* = 8.23 Hz, 2H), 6.81 (d, *J* = 8.23 Hz, 2H), 5.19 (br s, 1H), 2.63 (d, *J* = 17.84 Hz, 1H), 2.44 (d, *J* = 17.38 Hz, 1H), 2.46 - 2.20 (m, 4H), 1.36 (s, 3H)

**<sup>13</sup>C NMR** (100 MHz, Chloroform-*d*)  $\delta$  219.5 (C), 154.1 (C), 140.6 (C), 126.7 (CH), 115.4 (CH), 52.6 (CH<sub>2</sub>), 43.3 (C), 36.9 (CH<sub>2</sub>), 36.2 (CH<sub>2</sub>), 29.6 (CH<sub>3</sub>)

**HRMS** (ESI-TOF) *m/z* Calculated for C<sub>12</sub>H<sub>14</sub>O<sub>2</sub>Na [M+Na]<sup>+</sup>: 213.0891, found: 213.0870

$[\alpha]_D^{21} = -33.97$  (c 0.415, CHCl<sub>3</sub>) for a 95% ee

Chiral HPLC analysis on a CHIRALPAK OJ-H column, Hexane: *i*PrOH = 9: 1, 40 °C, flow = 1.0 ml/min, UV detection at 254 nm, retention times (min): 28.7 (major) and 33.9 (minor).

### Racemic sample:

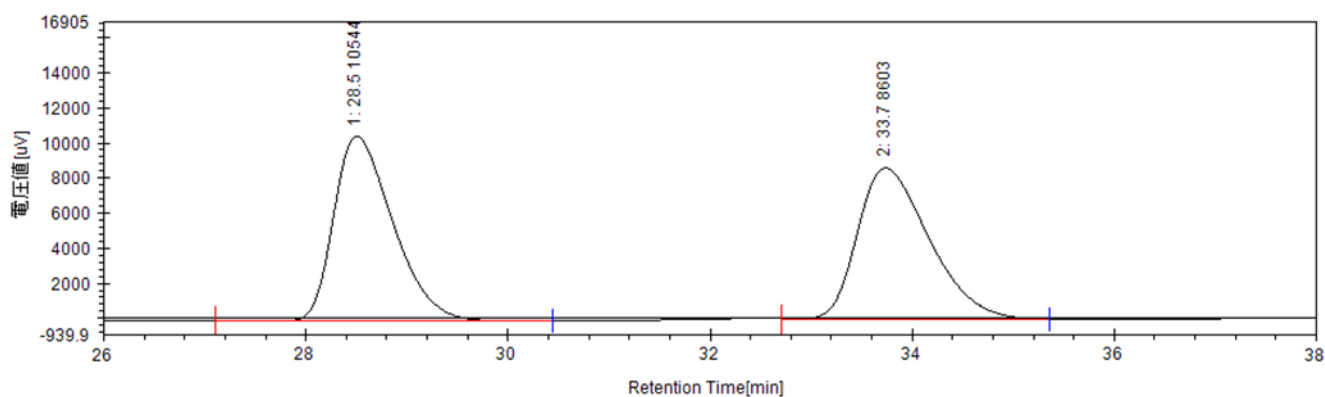

| Peak | Rt [min] | Height [uV] | Area [uV*min] | Area % | NTP     | Symmetry factor | Resolution |
|------|----------|-------------|---------------|--------|---------|-----------------|------------|
| 1    | 28.5     | 10544       | 7154.1        | 50.393 | 11324.4 | 1.442           | ***        |
| 2    | 33.7     | 8603        | 7042.6        | 49.607 | 10823.7 | 1.431           | 4.431      |

### Enantiomeric sample (3q):

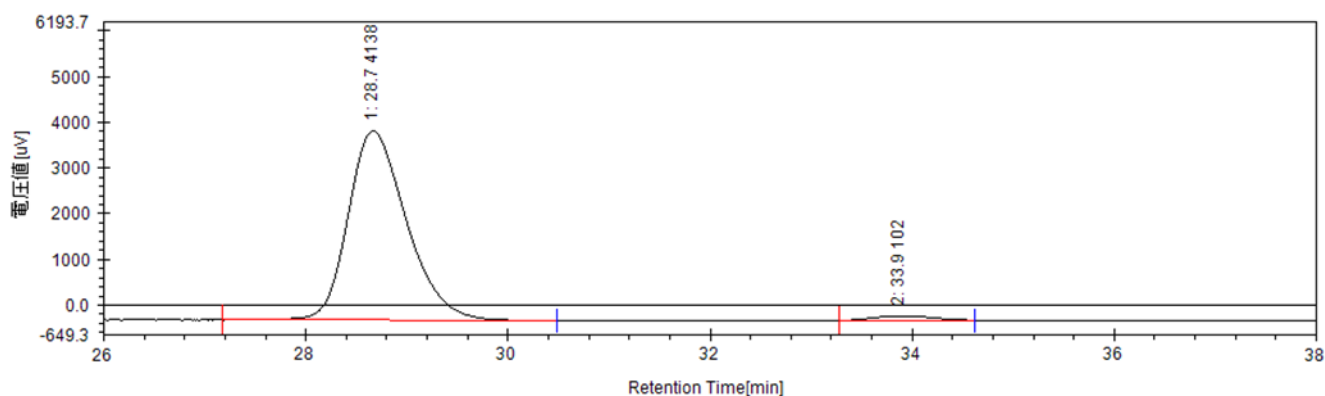

| Peak | Rt [min] | Height [uV] | Area [uV*min] | Area % | NTP     | Symmetry factor | Resolution |
|------|----------|-------------|---------------|--------|---------|-----------------|------------|
| 1    | 28.7     | 4138        | 2775.3        | 97.654 | 12186.9 | 1.277           | ***        |
| 2    | 33.9     | 102         | 66.7          | 2.346  | 15126.9 | 1.134           | 4.887      |

### (R)-methyl 4-(1-methyl-3-oxocyclopentyl) benzoate: **3r**<sup>10</sup>

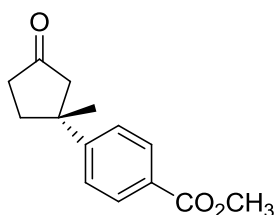

Synthesized according to General Procedure A from 3-Methyl-2-cyclopent-1-one **1a** (0.14 mmol, 13.4 mg) and 4-Methoxycarbonyl phenyl boronic acid (0.28 mmol, 50.4 mg). The crude product was purified by flash chromatography (Hexane: AcOEt = 10: 1) to yield **3r** (32.5 mg, 90%, 99%

ee) as a white solid.

m.p. = 94 - 95 °C

<sup>1</sup>H NMR (400 MHz, Chloroform-*d*) δ 8.01 (d, *J* = 8.69 Hz, 2H), 7.36 (d, *J* = 8.23 Hz, 2H), 3.92 (s, 3H), 2.65 (d, *J* = 17.38 Hz, 1H), 2.51 (d, *J* = 17.84 Hz, 1H), 2.50- 2.28 (m, 4H), 1.40 (s, 3H)

<sup>13</sup>C NMR (100 MHz, Chloroform-*d*) δ 217.7 (C), 166.9 (C), 153.8 (C), 130.0 (CH), 128.4 (C), 125.6 (CH), 52.1 (CH<sub>3</sub>), 52.0 (CH<sub>2</sub>), 44.1 (C), 36.7 (CH<sub>2</sub>), 35.6 (CH<sub>2</sub>), 29.2 (CH<sub>3</sub>)

HRMS (ESI-TOF) *m/z* Calculated for C<sub>14</sub>H<sub>16</sub>O<sub>3</sub>Na [M+Na]<sup>+</sup>: 255.0997, found: 225.1001

[α]<sub>D</sub><sup>23</sup> = +3.40 (c 1.8, EtOH) for a 99% ee

Chiral HPLC analysis on a CHIRALPAK AD-H column, Hexane: *i*PrOH = 9: 1, 40 °C, flow = 1.0 ml/min, UV detection at 225 nm, retention times (min): 9.3 (minor) and 10.5 (major).

The absolute configuration was determined by comparison of the optical rotation with literature value.<sup>10</sup>

#### Racemic sample:

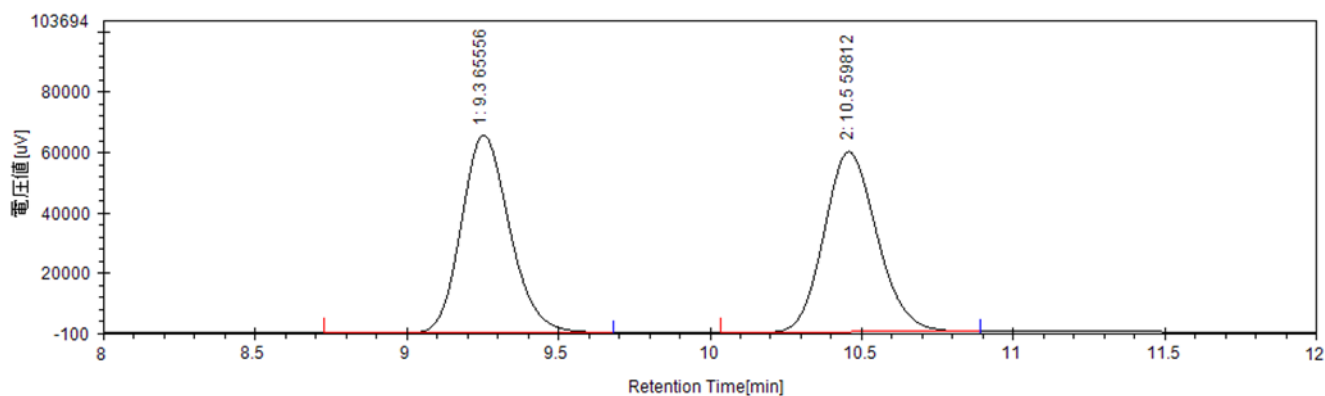

| Peak | Rt[min] | Height [uV] | Area [uV*min] | Area % | NTP     | Symmetry factor | Resolution |
|------|---------|-------------|---------------|--------|---------|-----------------|------------|
| 1    | 9.3     | 65556       | 12054.2       | 49.907 | 16558.6 | 1.194           | ***        |
| 2    | 10.5    | 59812       | 12099         | 50.093 | 17335.3 | 1.135           | 4.003      |



### Enantiomeric sample (3r):

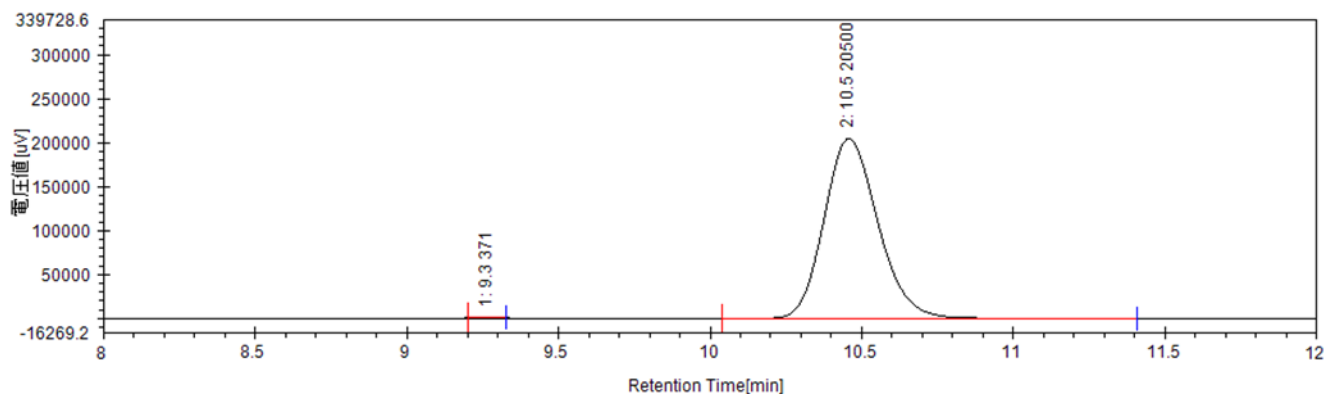

| Peak | Rt[min] | Height [uV] | Area [uV*min] | Area % | NTP     | Symmetry factor | Resolution |
|------|---------|-------------|---------------|--------|---------|-----------------|------------|
| 1    | 9.3     | 371         | 29.9          | 0.071  | 67417.8 | 0.934           | ***        |
| 2    | 10.5    | 205001      | 42196.2       | 99.929 | 16865.8 | 1.164           | 5.14       |

### (R)-3-methyl-3-phenylcyclohexanone: **3s**<sup>9a-c,11</sup>

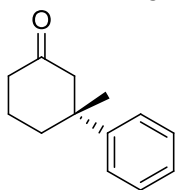

Synthesized according to General Procedure A from 3-Methyl-2-cyclohexen-1-one **1b** (0.14 mmol, 15.4 mg) and Phenyl boronic acid (0.28 mmol, 34.2 mg). The crude product was purified by flash chromatography (Hexane: AcOEt = 20: 1) to yield **3s** (25.5 mg, 98%, 99% ee) as a colorless oil.

**<sup>1</sup>H NMR** (400 MHz, Chloroform-*d*)  $\delta$  7.37 - 7.28 (m, 4H), 7.26 - 7.18 (m, 1H), 2.88 (d,  $J$  = 14.2 Hz, 1H), 2.44 (d,  $J$  = 14.2 Hz, 1H), 2.37 - 2.28 (m, 2H), 2.26 - 2.13 (m, 1H), 1.96 - 1.83 (m, 2H), 1.72 - 1.62 (m, 1H), 1.32 (s, 3H)

**<sup>13</sup>C NMR** (100 MHz, Chloroform-*d*)  $\delta$  211.6 (C), 147.5 (C), 128.6 (CH), 126.3 (CH), 125.7 (CH), 53.2 (CH<sub>2</sub>), 42.9 (C), 40.9 (CH<sub>2</sub>), 38.0 (CH<sub>2</sub>), 29.8 (CH<sub>3</sub>), 22.1 (CH<sub>2</sub>)

\*The NMR data match with those reported in literature.<sup>9a-c,11</sup>

**HRMS** (ESI-TOF)  $m/z$  Calculated for C<sub>13</sub>H<sub>16</sub>ONa [M+Na]<sup>+</sup>: 211.1099, found: 211.1089

$[\alpha]_D^{23}$  = -77.1 (c 0.78, CHCl<sub>3</sub>)

Chiral HPLC analysis on a CHIRALPAK OJ-H column, Hexane: *i*PrOH = 99: 1, 40 °C, flow = 0.5 ml/min, UV detection at 225 nm, retention times (min): 8.7 (minor) and 10 (major).

The absolute configuration was determined by comparison of the optical rotation with literature value.<sup>9a-c,11</sup>

**Racemic sample:**

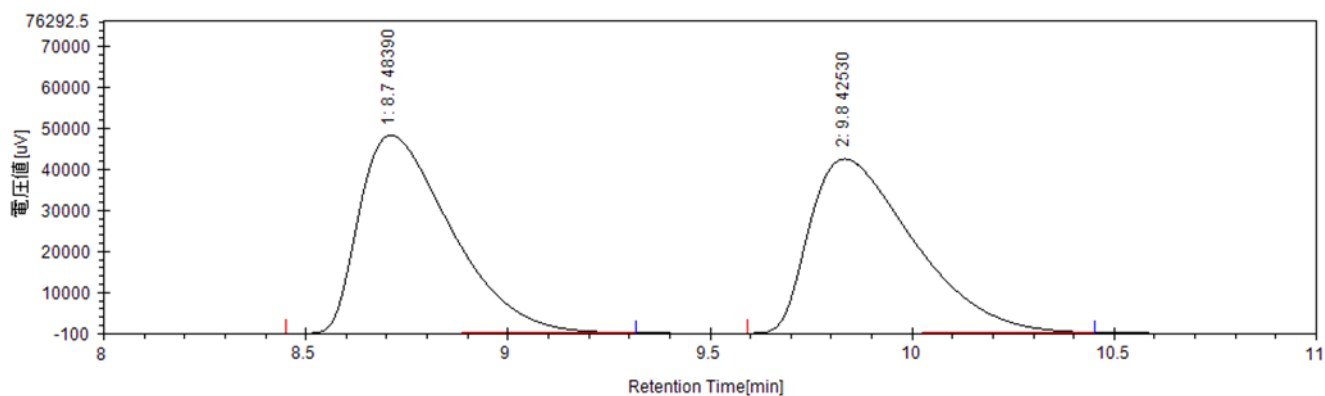

| Peak | Rt [min] | Height [uV] | Area [uV*min] | Area % | NTP    | Symmetry factor | Resolution |
|------|----------|-------------|---------------|--------|--------|-----------------|------------|
| 1    | 8.7      | 48390       | 12721.7       | 50.105 | 6957.6 | 1.782           | ***        |
| 2    | 9.8      | 42530       | 12668.2       | 49.895 | 6866.5 | 1.798           | 2.528      |

**Enantiomeric sample (3s):**

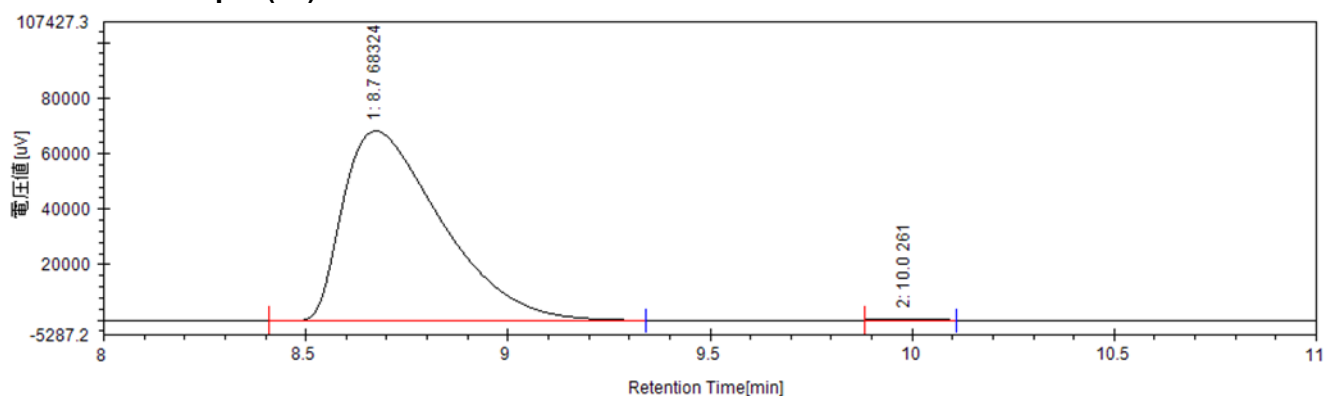

| Peak | Rt [min] | Height [uV] | Area [uV*min] | Area % | NTP     | Symmetry factor | Resolution |
|------|----------|-------------|---------------|--------|---------|-----------------|------------|
| 1    | 8.7      | 68324       | 19247.7       | 99.813 | 6016    | 1.848           | ***        |
| 2    | 10       | 261         | 36.1          | 0.187  | 26666.1 | 1.12            | 3.792      |

**(R)-3-(3-methoxyphenyl)-3-methylcyclohexanone: 3t**<sup>9d, e, 12</sup>

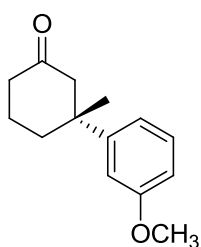

Synthesized according to General Procedure A from 3-Methyl-2-cyclohexen-1-one **1b** (0.14 mmol, 15.4 mg) and 3-Methoxyphenyl boronic acid (0.28 mmol, 42.6 mg). The crude product was purified by flash chromatography (Hexane: AcOEt = 20: 1) to yield **3t** (27.5 mg, 90%, 99% ee) as a colorless oil.

<sup>1</sup>H NMR (400 MHz, Chloroform-*d*)  $\delta$  7.27 - 7.23 (m, 1H), 6.92 - 6.87 (m, 2H), 6.76 - 6.74 (m, 1H), 3.80 (s, 3H), 2.86 (d, *J* = 14.6 Hz, 1H), 2.43 (d, *J* = 14.2 Hz, 1H), 2.33 - 2.31 (m, 2H), 2.30 - 2.14 (m, 2H), 1.94 - 1.82 (m, 2H), 1.73 - 1.63 (m, 1H), 1.31 (s, 3H)

<sup>13</sup>C NMR (100 MHz, Chloroform-*d*)  $\delta$  211.4 (C), 159.8 (C), 149.4 (C), 129.6 (CH), 118.1 (CH), 112.2 (CH), 111.0 (CH), 55.3 (CH<sub>3</sub>), 53.2 (CH<sub>2</sub>), 43.0 (C), 40.9 (CH<sub>2</sub>), 38.0 (CH<sub>2</sub>), 29.8 (CH<sub>3</sub>), 22.1 (CH<sub>2</sub>)

HRMS (ESI-TOF) *m/z* Calculated for C<sub>14</sub>H<sub>18</sub>O<sub>2</sub>Na [M+Na]<sup>+</sup>: 241.1204, found: 241.1204

$[\alpha]_D^{24} = -71.1$  (c 0.38, CHCl<sub>3</sub>) for a 99% ee

Chiral HPLC analysis on a CHIRALPAK OD-H column, Hexane: *i*PrOH = 99: 1, 40 °C, flow = 1.0 ml/min, UV detection at 254 nm, retention times (min): 27.9 (major) and 37.7 (minor).

The absolute configuration was determined by comparison of the optical rotation with literature value.<sup>9d, e, 12</sup>

**Racemic sample:**

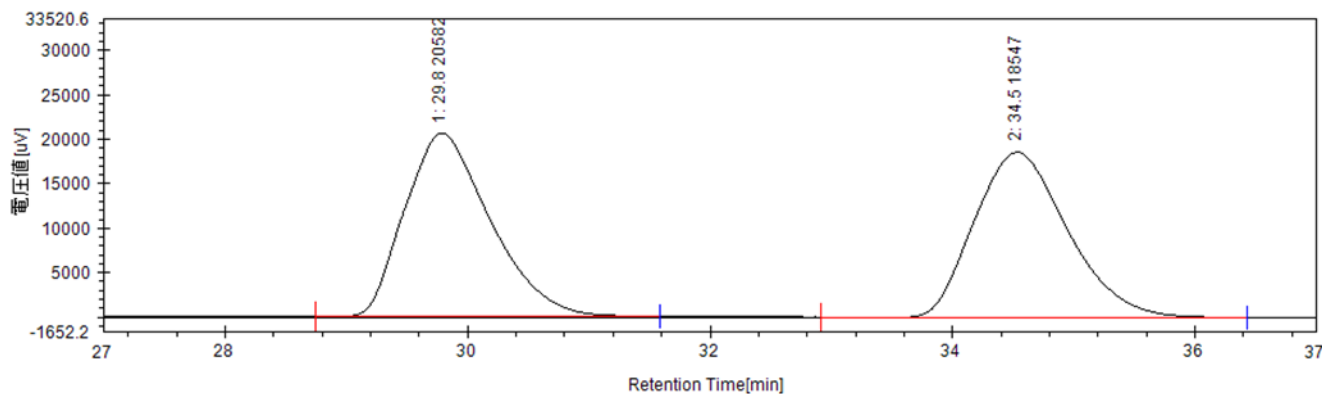

| Peak | Rt [min] | Height [uV] | Area [uV*min] | Area % | NTP    | Symmetry factor | Resolution |
|------|----------|-------------|---------------|--------|--------|-----------------|------------|
| 1    | 29.8     | 20582       | 16759         | 50.401 | 8279.1 | 1.333           | ***        |
| 2    | 34.5     | 18547       | 16492.5       | 49.599 | 9392.2 | 1.234           | 3.483      |

**Enantiomeric sample (3t):**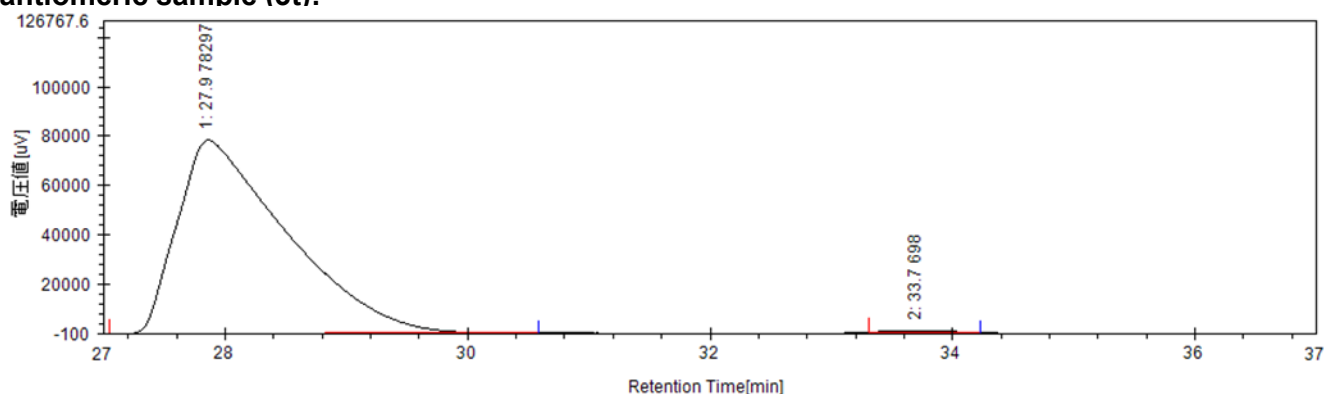

| Peak | Rt [min] | Height [uV] | Area [uV*min] | Area % | NTP     | Symmetry factor | Resolution |
|------|----------|-------------|---------------|--------|---------|-----------------|------------|
| 1    | 27.9     | 78297       | 81536.1       | 99.529 | 4563.9  | 2.108           | ***        |
| 2    | 33.7     | 698         | 385.6         | 0.471  | 19450.9 | 1.137           | 4.484      |

**(R)-3-(4-methoxyphenyl)-3-methylcyclohexanone: 3u<sup>9d, e, 12</sup>**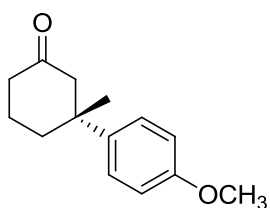

Synthesized according to General Procedure A from 3-Methyl-2-cyclohexen-1-one **1b** (0.14 mmol, 15.4 mg) and 4-Methoxyphenyl boronic acid (0.28 mmol, 42.6 mg). The crude product was purified by flash chromatography (Hexane: AcOEt = 20: 1) to yield **3u** (27.8 mg, 91%, 99% ee) as a colorless oil.

**<sup>1</sup>H NMR** (400 MHz, Chloroform-*d*)  $\delta$  7.24 - 7.21 (m, 2H), 6.87 - 6.84 (m, 2H), 3.79 (s, 3H), 2.85 (d,  $J = 14.2$  Hz, 1H), 2.41 (d,  $J = 14.2$  Hz, 1H), 2.32 - 2.28 (m, 2H), 2.19 - 2.12 (m, 1H), 1.92 - 1.81 (m, 2H), 1.71 - 1.61 (m, 1H), 1.30 (s, 3H)

**<sup>13</sup>C NMR** (100 MHz, Chloroform-*d*)  $\delta$  211.7 (C), 157.9 (C), 139.6 (C), 126.7 (CH), 113.9 (CH), 55.3 (CH<sub>3</sub>), 53.4 (CH<sub>2</sub>), 42.4 (C), 40.9 (CH<sub>2</sub>), 38.2 (CH<sub>2</sub>), 30.2 (CH<sub>3</sub>), 22.1 (CH<sub>2</sub>)

**HRMS** (ESI-TOF)  $m/z$  Calculated for C<sub>14</sub>H<sub>18</sub>O<sub>2</sub>Na [M+Na]<sup>+</sup>: 241.1204, found: 241.1205

$[\alpha]_D^{25} = -67.1$  (c 0.79, CHCl<sub>3</sub>) for a 99% ee

Chiral HPLC analysis on a CHIRALPAK AS-H column, Hexane: *i*PrOH = 99: 1, 40 °C, flow = 1.0 ml/min, UV detection at 254 nm, retention times (min): 19.9 (major) and 38.4 (minor).

The absolute configuration was determined by comparison of the optical rotation with literature value.<sup>9d, e, 12</sup>

**Racemic sample:**

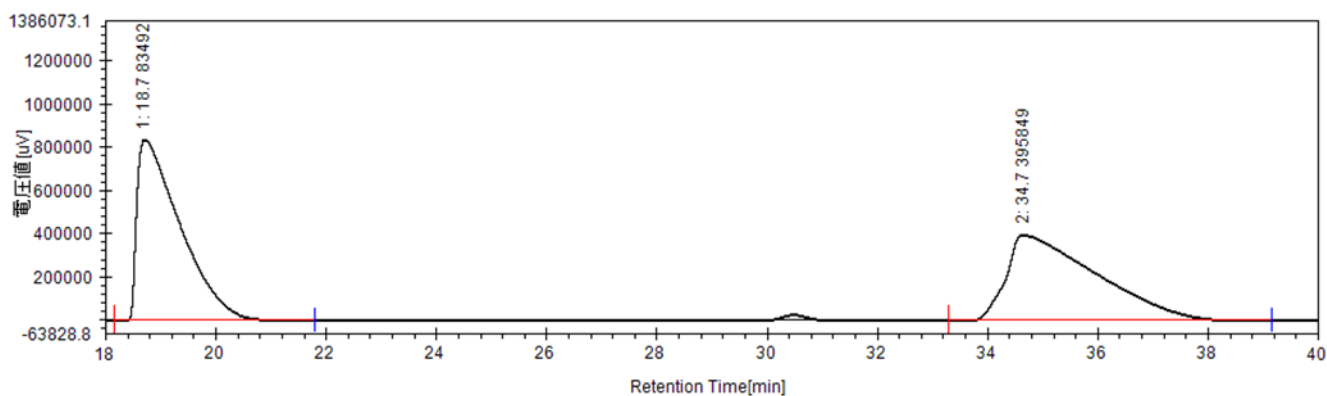

| Peak | Rt[min] | Height [uV] | Area [uV*min] | Area % | NTP    | Symmetry factor | Resolution |
|------|---------|-------------|---------------|--------|--------|-----------------|------------|
| 1    | 18.7    | 834926      | 753740.7      | 50.3   | 2754.5 | 3.734           | ***        |
| 2    | 34.7    | 395849      | 744739.4      | 49.7   | 2169.1 | 2.52            | 7.261      |

**Enantiomeric sample (3u):**

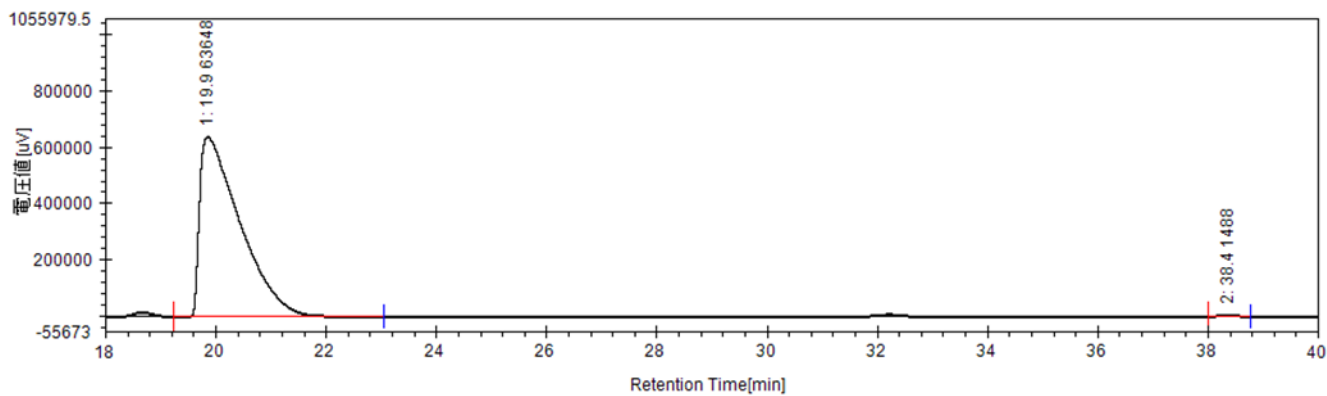

| Peak | Rt[min] | Height [uV] | Area [uV*min] | Area % | NTP     | Symmetry factor | Resolution |
|------|---------|-------------|---------------|--------|---------|-----------------|------------|
| 1    | 19.9    | 636481      | 536814.4      | 99.869 | 3583.8  | 3.535           | ***        |
| 2    | 38.4    | 1488        | 703.8         | 0.131  | 33714.5 | 0.996           | 17.174     |

**(R)-3-methyl-3-phenylcycloheptanone: 3v**<sup>9,11c, d</sup>

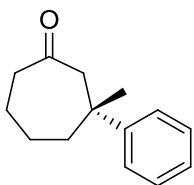

Synthesized according to General Procedure A from 3-Methyl-2-cyclohepten-1-one **1c** (0.14 mmol, 17.4 mg) and Phenyl boronic acid (0.28 mmol, 34.2 mg). The crude product was purified by flash chromatography (Hexane: AcOEt = 20: 1) to yield **3v** (25.1 mg, 89%, 94% ee) as a colorless oil.

**<sup>1</sup>H NMR** (400 MHz, Chloroform-*d*)  $\delta$  7.33 - 7.17 (m, 5H), 3.21 (d, *J* = 14.2 Hz, 1H), 2.71 (d, *J* = 14.6 Hz, 1H), 2.46 - 2.16 (m, 3H), 1.84 - 1.70 (m, 5H), 1.27 (s, 3H)

**<sup>13</sup>C NMR** (100 MHz, Chloroform-*d*)  $\delta$  213.9 (C), 148.0 (C), 128.6 (CH), 126.0 (CH), 125.7 (CH), 55.7 (CH<sub>2</sub>), 44.3 (CH<sub>2</sub>), 43.5 (CH<sub>2</sub>), 39.9 (C), 32.0 (CH<sub>3</sub>), 25.9 (CH<sub>2</sub>), 24.0 (CH<sub>2</sub>)

**HRMS** (ESI-TOF) *m/z* Calculated for C<sub>14</sub>H<sub>18</sub>ONa [M+Na]<sup>+</sup>: 225.1255, found: 225.1258

$[\alpha]_D^{24} = -75.1$  (c 0.51, CHCl<sub>3</sub>) for a 94% ee

Chiral HPLC analysis on a CHIRALPAK OJ-H column, Hexane: *i*PrOH = 99: 1, 40 °C, flow = 0.5 ml/min, UV detection at 254 nm, retention times (min): 21.7 (major) and 23.5 (minor).

The absolute configuration was determined by comparison of the optical rotation with literature value.<sup>9, 11c, d</sup>

**Racemic sample:**

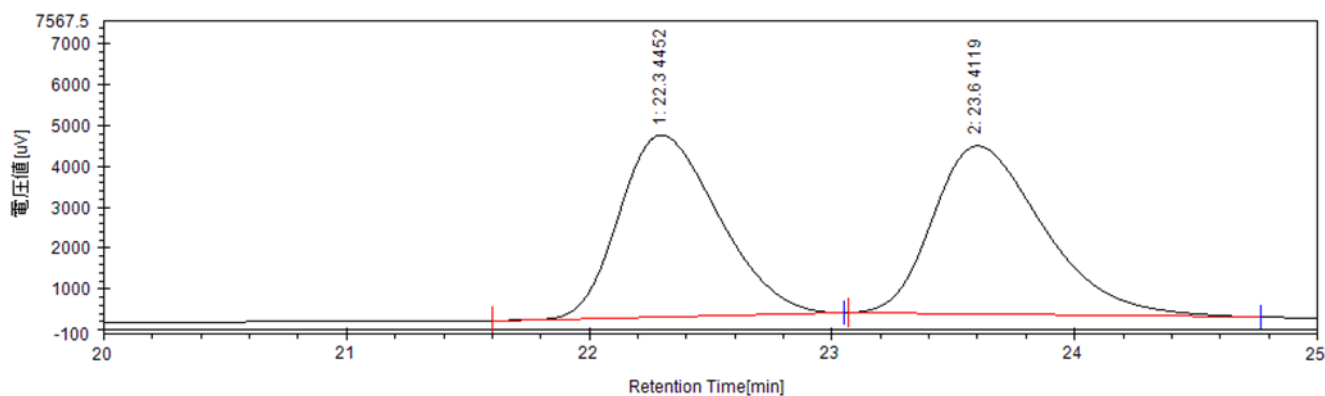

| Peak | Rt[min] | Height [uV] | Area [uV*min] | Area % | NTP     | Symmetry factor | Resolution |
|------|---------|-------------|---------------|--------|---------|-----------------|------------|
| 1    | 22.3    | 4452        | 2102.2        | 49.137 | 13765.3 | 1.257           | ***        |
| 2    | 23.6    | 4119        | 2176.1        | 50.863 | 13117   | 1.408           | 1.645      |

### Enantiomeric sample (3v):

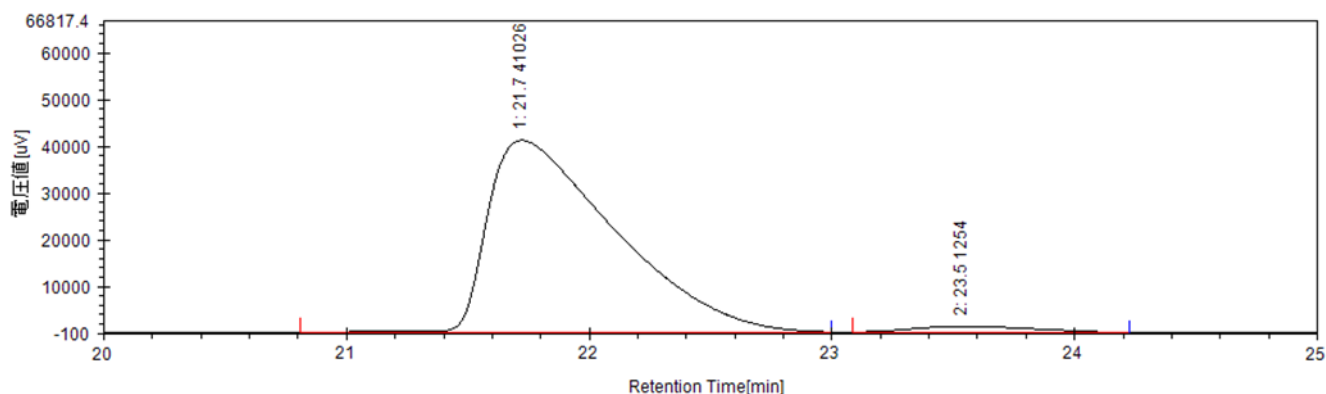

| Peak | Rt[min] | Height [uV] | Area [uV*min] | Area % | NTP    | Symmetry factor | Resolution |
|------|---------|-------------|---------------|--------|--------|-----------------|------------|
| 1    | 21.7    | 41026       | 24862.4       | 97.224 | 8138.1 | 2.317           | ***        |
| 2    | 23.5    | 1254        | 709.8         | 2.776  | 9901   | 1.275           | 1.908      |

### (R)-3-(3-methoxyphenyl)-3-methylcycloheptanone: 3w

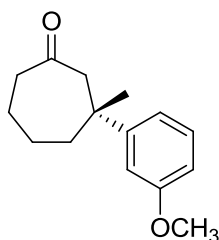

Synthesized according to General Procedure A from 3-Methyl-2-cyclohepten-1-one **1c** (0.14 mmol, 17.4 mg) and 3-Methoxyphenyl boronic acid (0.28 mmol, 42.6 mg). The crude product was purified by flash chromatography (Hexane: AcOEt = 20: 1) to yield **3w** (29.9 mg, 92%, 93% ee) as a colorless oil.

**<sup>1</sup>H NMR** (400 MHz, Chloroform-*d*)  $\delta$  7.26 - 7.22 (m, 1H), 6.92 - 6.86 (m, 2H), 6.75 - 6.73 (m, 1H), 3.80 (s, 3H), 3.17 (d, *J* = 14.2 Hz, 1H), 2.70 (d, *J* = 14.2 Hz, 1H), 2.46 - 2.17 (m, 3H), 1.82 - 1.70 (m, 5H), 1.26 (s, 3H)

**<sup>13</sup>C NMR** (100 MHz, Chloroform-*d*)  $\delta$  213.9 (C), 159.8 (C), 149.8 (C), 129.6 (CH), 118.1 (CH), 112.3 (CH), 110.7 (CH), 55.8 (CH<sub>2</sub>), 55.3 (CH<sub>3</sub>), 44.3 (CH<sub>2</sub>), 43.5 (CH<sub>2</sub>), 40.0 (C), 32.0 (CH<sub>3</sub>), 25.9 (CH<sub>2</sub>), 24.0 (CH<sub>2</sub>)

**HRMS** (ESI-TOF) *m/z* Calculated for C<sub>15</sub>H<sub>20</sub>O<sub>2</sub>Na [M+Na]<sup>+</sup>: 255.1361, found: 255.1367

$[\alpha]_D^{27} = -51.1$  (c 0.35, CHCl<sub>3</sub>) for a 93% ee

Chiral HPLC analysis on a CHIRALPAK OD-H column, Hexane: *i*PrOH = 99: 1, 40 °C, flow = 1.0 ml/min, UV detection at 210 nm, retention times (min): 21 (minor) and 22.4 (major).

### Racemic sample:

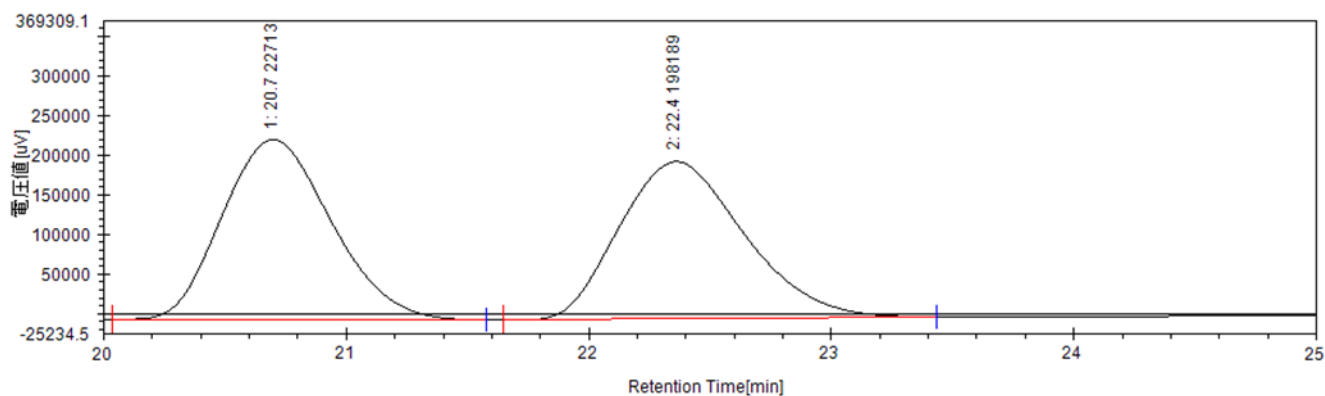

| Peak | Rt[min] | Height [uV] | Area [uV*min] | Area % | NTP    | Symmetry factor | Resolution |
|------|---------|-------------|---------------|--------|--------|-----------------|------------|
| 1    | 20.7    | 227134      | 118037.5      | 49.949 | 9751   | 1.165           | ***        |
| 2    | 22.4    | 198189      | 118277.2      | 50.051 | 8683.3 | 1.237           | 1.849      |

### Enantiomeric sample (3w):

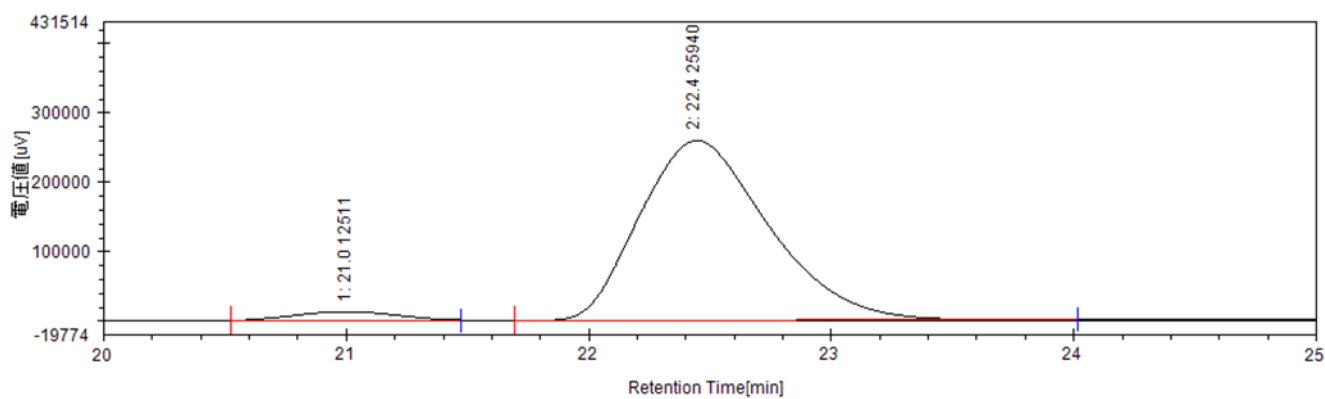

| Peak | Rt[min] | Height [uV] | Area [uV*min] | Area % | NTP     | Symmetry factor | Resolution |
|------|---------|-------------|---------------|--------|---------|-----------------|------------|
| 1    | 21      | 12511       | 5955.2        | 3.604  | 11195.1 | 1.002           | ***        |
| 2    | 22.4    | 259408      | 159270.2      | 96.396 | 8395.7  | 1.304           | 1.63       |



### (R)-3-(4-methoxyphenyl)-3-methylcycloheptanone: 3x

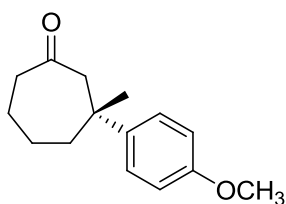

Synthesized according to General Procedure A from 3-Methyl-2-cyclohepten-1-one **1c** (0.14 mmol, 17.4 mg) and 4-Methoxyphenyl boronic acid (0.28 mmol, 42.6 mg). The crude product was purified by flash chromatography (Hexane: AcOEt = 20: 1) to yield **3x** (29.2 mg, 90%, 95% ee) as a colorless oil.

**<sup>1</sup>H NMR** (400 MHz, Chloroform-*d*)  $\delta$  7.23 (d,  $J$  = 8.69 Hz, 2H), 6.85 (d,  $J$  = 8.69 Hz, 2H), 3.79 (s, 3H), 3.16 (d,  $J$  = 14.2 Hz, 1H), 2.70 (d,  $J$  = 14.2 Hz, 1H), 2.45 - 2.15 (m, 3H), 1.82 - 1.68 (m, 5H), 1.24 (s, 3H)

**<sup>13</sup>C NMR** (100 MHz, Chloroform-*d*)  $\delta$  214.1 (C), 157.7 (C), 140.0 (C), 126.7 (CH), 113.9 (CH), 56.0 (CH<sub>2</sub>), 55.3 (CH<sub>3</sub>), 44.3 (CH<sub>2</sub>), 43.7 (CH<sub>2</sub>), 39.4 (C), 32.3 (CH<sub>3</sub>), 25.9 (CH<sub>2</sub>), 24.0 (CH<sub>2</sub>)

**HRMS** (ESI-TOF)  $m/z$  Calculated for C<sub>15</sub>H<sub>20</sub>O<sub>2</sub>Na [M+Na]<sup>+</sup>: 255.1361, found: 255.1366

$[\alpha]_D^{26}$  = -66.3 (c 0.68, CHCl<sub>3</sub>) for a 95% ee

Chiral HPLC analysis on a CHIRALPAK AS-H column, Hexane: *i*PrOH = 99: 1, 40 °C, flow = 1.0 ml/min, UV detection at 210 nm, retention times (min): 24.6 (major) and 30.7 (minor).

### Racemic sample:

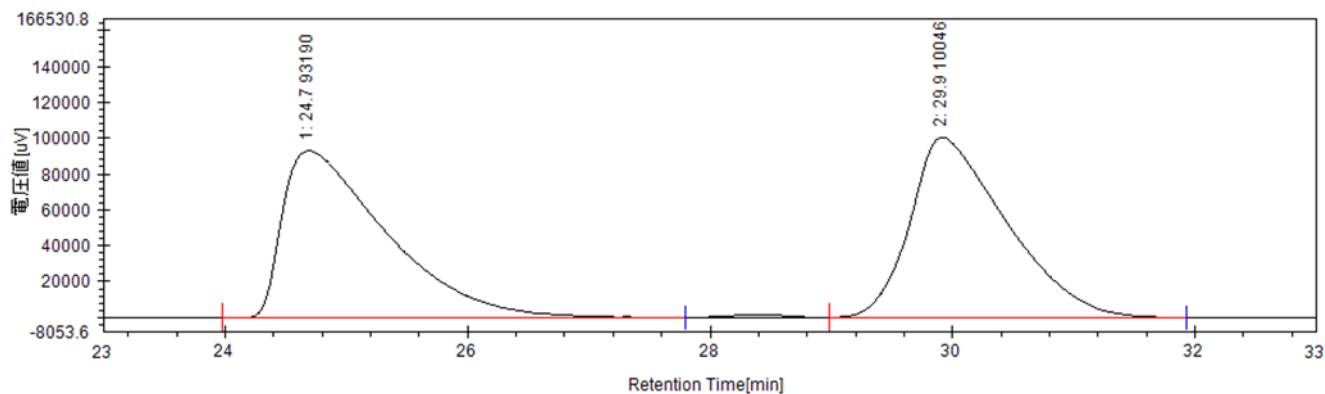

| Peak | Rt[min] | Height [uV] | Area [uV*min] | Area % | NTP    | Symmetry factor | Resolution |
|------|---------|-------------|---------------|--------|--------|-----------------|------------|
| 1    | 24.7    | 93190       | 92365.7       | 49.961 | 4145.6 | 2.627           | ***        |
| 2    | 29.9    | 100466      | 92509.8       | 50.039 | 7024.6 | 1.526           | 3.538      |

### Enantiomeric sample (3x):

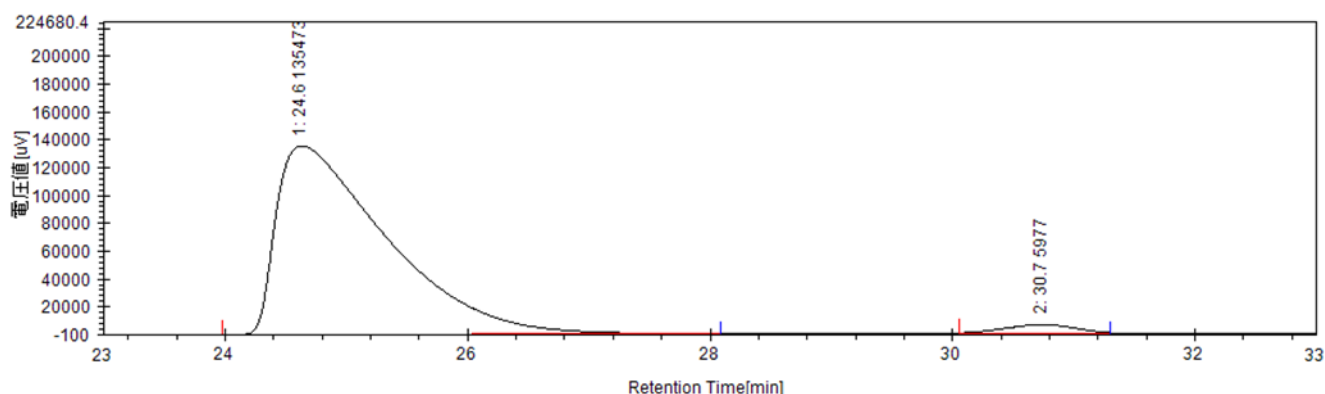

| Peak | Rt[min] | Height [uV] | Area [uV*min] | Area % | NTP     | Symmetry factor | Resolution |
|------|---------|-------------|---------------|--------|---------|-----------------|------------|
| 1    | 24.6    | 135473      | 142799.8      | 97.39  | 3653.4  | 2.984           | ***        |
| 2    | 30.7    | 5977        | 3826.6        | 2.61   | 13290.3 | 0.91            | 4.542      |

### (R)-4-methyl-4-phenyldihydrofuran-2(3H)-one: **3y**<sup>13</sup>

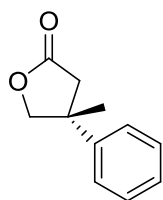

Synthesized according to General Procedure A from 4-Methylfuran-2(5H)-one **1d** (0.14 mmol, 13.7 mg) and Phenyl boronic acid (0.28 mmol, 34.2 mg). The crude product was purified by flash chromatography (Hexane: AcOEt = 20: 1) to yield **3y** (22.1 mg, 90%, 88% ee) as a colorless oil.

<sup>1</sup>H NMR (400 MHz, Chloroform-*d*)  $\delta$  7.40 - 7.18 (m, 5H), 4.43 (d, *J* = 8.7 Hz, 1H), 4.40 (d, *J* = 9.2 Hz, 1H), 2.92 (d, *J* = 17 Hz, 1H), 2.68 (d, *J* = 16.9 Hz, 1H), 1.53 (s, 3H)

<sup>13</sup>C NMR (100 MHz, Chloroform-*d*)  $\delta$  176.2 (C), 144.4 (C), 129.1 (CH), 127.3 (CH), 125.2 (CH), 78.5 (CH<sub>2</sub>), 44.2 (C), 42.1 (CH<sub>2</sub>), 28.1 (CH<sub>3</sub>)

HRMS (ESI-TOF) *m/z* Calculated for C<sub>11</sub>H<sub>12</sub>O<sub>2</sub>Na [M+Na]<sup>+</sup>: 199.0735, found: 199.0738

$[\alpha]_D^{23} = +15.7$  (*c* 0.67, CHCl<sub>3</sub>) for a 88% ee

Chiral HPLC analysis on a CHIRALPAK AD-H column, Hexane: *i*PrOH = 9: 1, 40 °C, flow = 0.7 ml/min, UV detection at 214 nm, retention times (min): 11 (minor) and 13.4 (major).

**Racemic sample:**

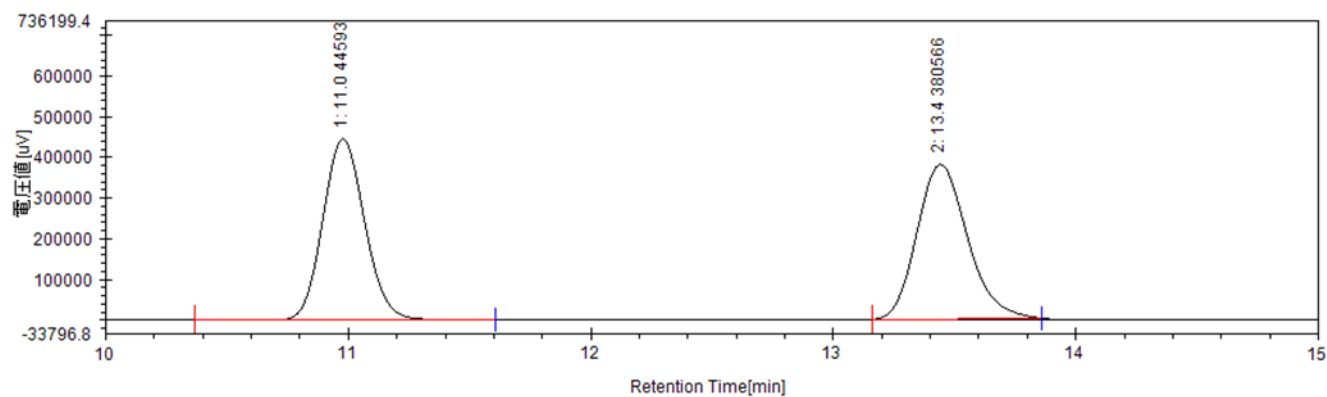

| Peak | Rt[min] | Height [uV] | Area [uV*min] | Area % | NTP     | Symmetry factor | Resolution |
|------|---------|-------------|---------------|--------|---------|-----------------|------------|
| 1    | 11      | 445932      | 89022.8       | 49.24  | 19371.2 | 1.121           | ***        |
| 2    | 13.4    | 380566      | 91769.3       | 50.76  | 20284.8 | 1.197           | 7.139      |

**Enantiomeric sample (3y):**

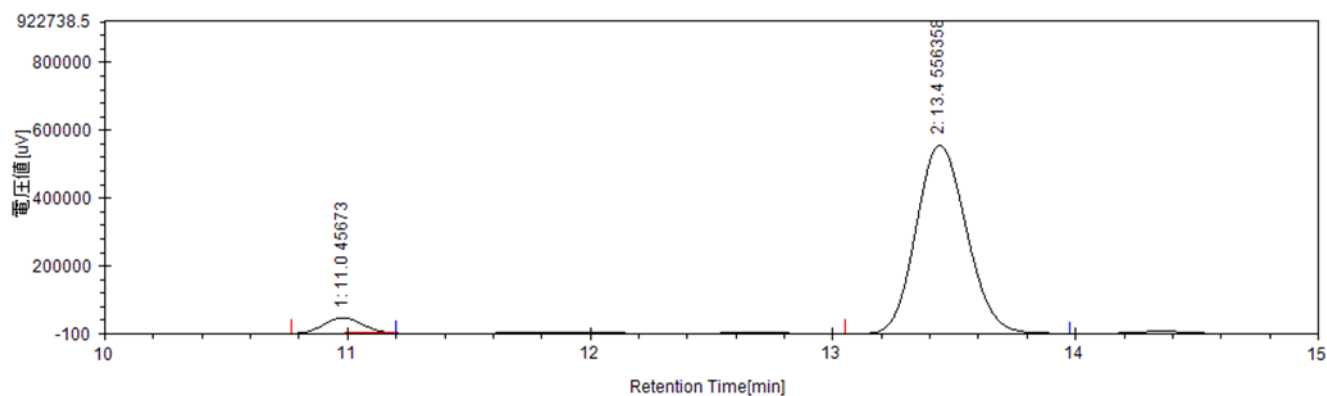

| Peak | Rt[min] | Height [uV] | Area [uV*min] | Area % | NTP     | Symmetry factor | Resolution |
|------|---------|-------------|---------------|--------|---------|-----------------|------------|
| 1    | 11      | 45673       | 8446.6        | 5.948  | 21613.1 | 1.029           | ***        |
| 2    | 13.4    | 556358      | 133567.8      | 94.052 | 19710.5 | 1.113           | 7.23       |

The absolute configuration was determined to be *R* by converting it to a known compound **3y-S** (Scheme S1).<sup>13</sup>

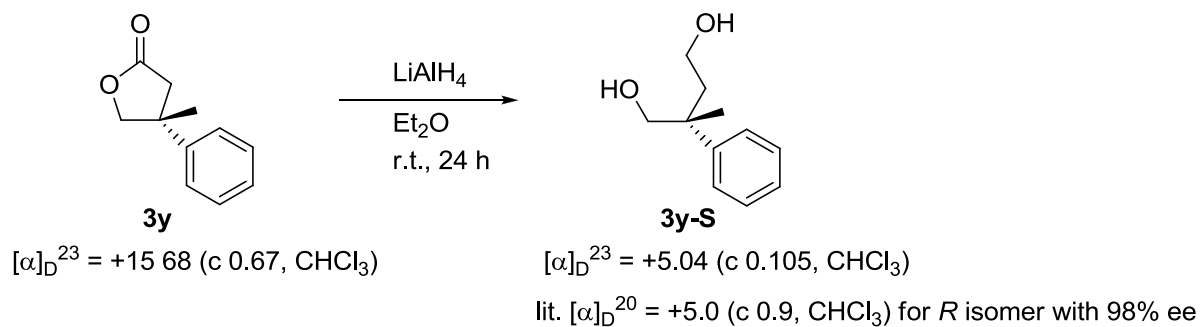

**Scheme S1** Reduction of **3y** to **3y-S**.

**(*R*)-2-methyl-2-phenylbutane-1,4-diol: 3y-S**<sup>13e</sup>

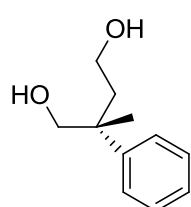

**<sup>1</sup>H NMR** (400 MHz, Chloroform-*d*)  $\delta$  7.43 - 7.31 (m, 4H), 7.26 - 7.20 (m, 1H), 3.79 - 3.76 (m, 1H), 3.71 - 3.66 (m, 2H), 3.62 - 3.54 (m, 1H), 2.16 (br s, 1H), 2.05 - 1.98 (m, 2H), 1.63 (br s, 1H), 1.35 (s, 3H)

**<sup>13</sup>C NMR** (100 MHz, Chloroform-*d*)  $\delta$  145.3 (C), 128.6 (CH), 126.4 (CH), 71.3 (CH<sub>2</sub>), 59.4 (CH<sub>2</sub>), 42.5 (C), 41.7 (CH<sub>2</sub>), 23.4 (CH<sub>3</sub>)

$[\alpha]_{\text{D}}^{23} = +5.04$  (c 0.105,  $\text{CHCl}_3$ ) (Lit.<sup>13</sup>  $[\alpha]_{\text{D}}^{20} = +5.0$  (c 0.9,  $\text{CHCl}_3$ ) for a 98% ee: *R* isomer)

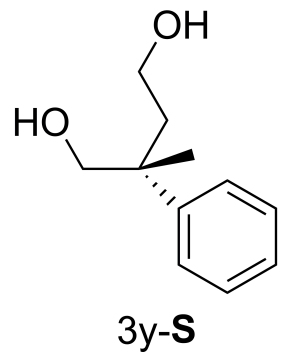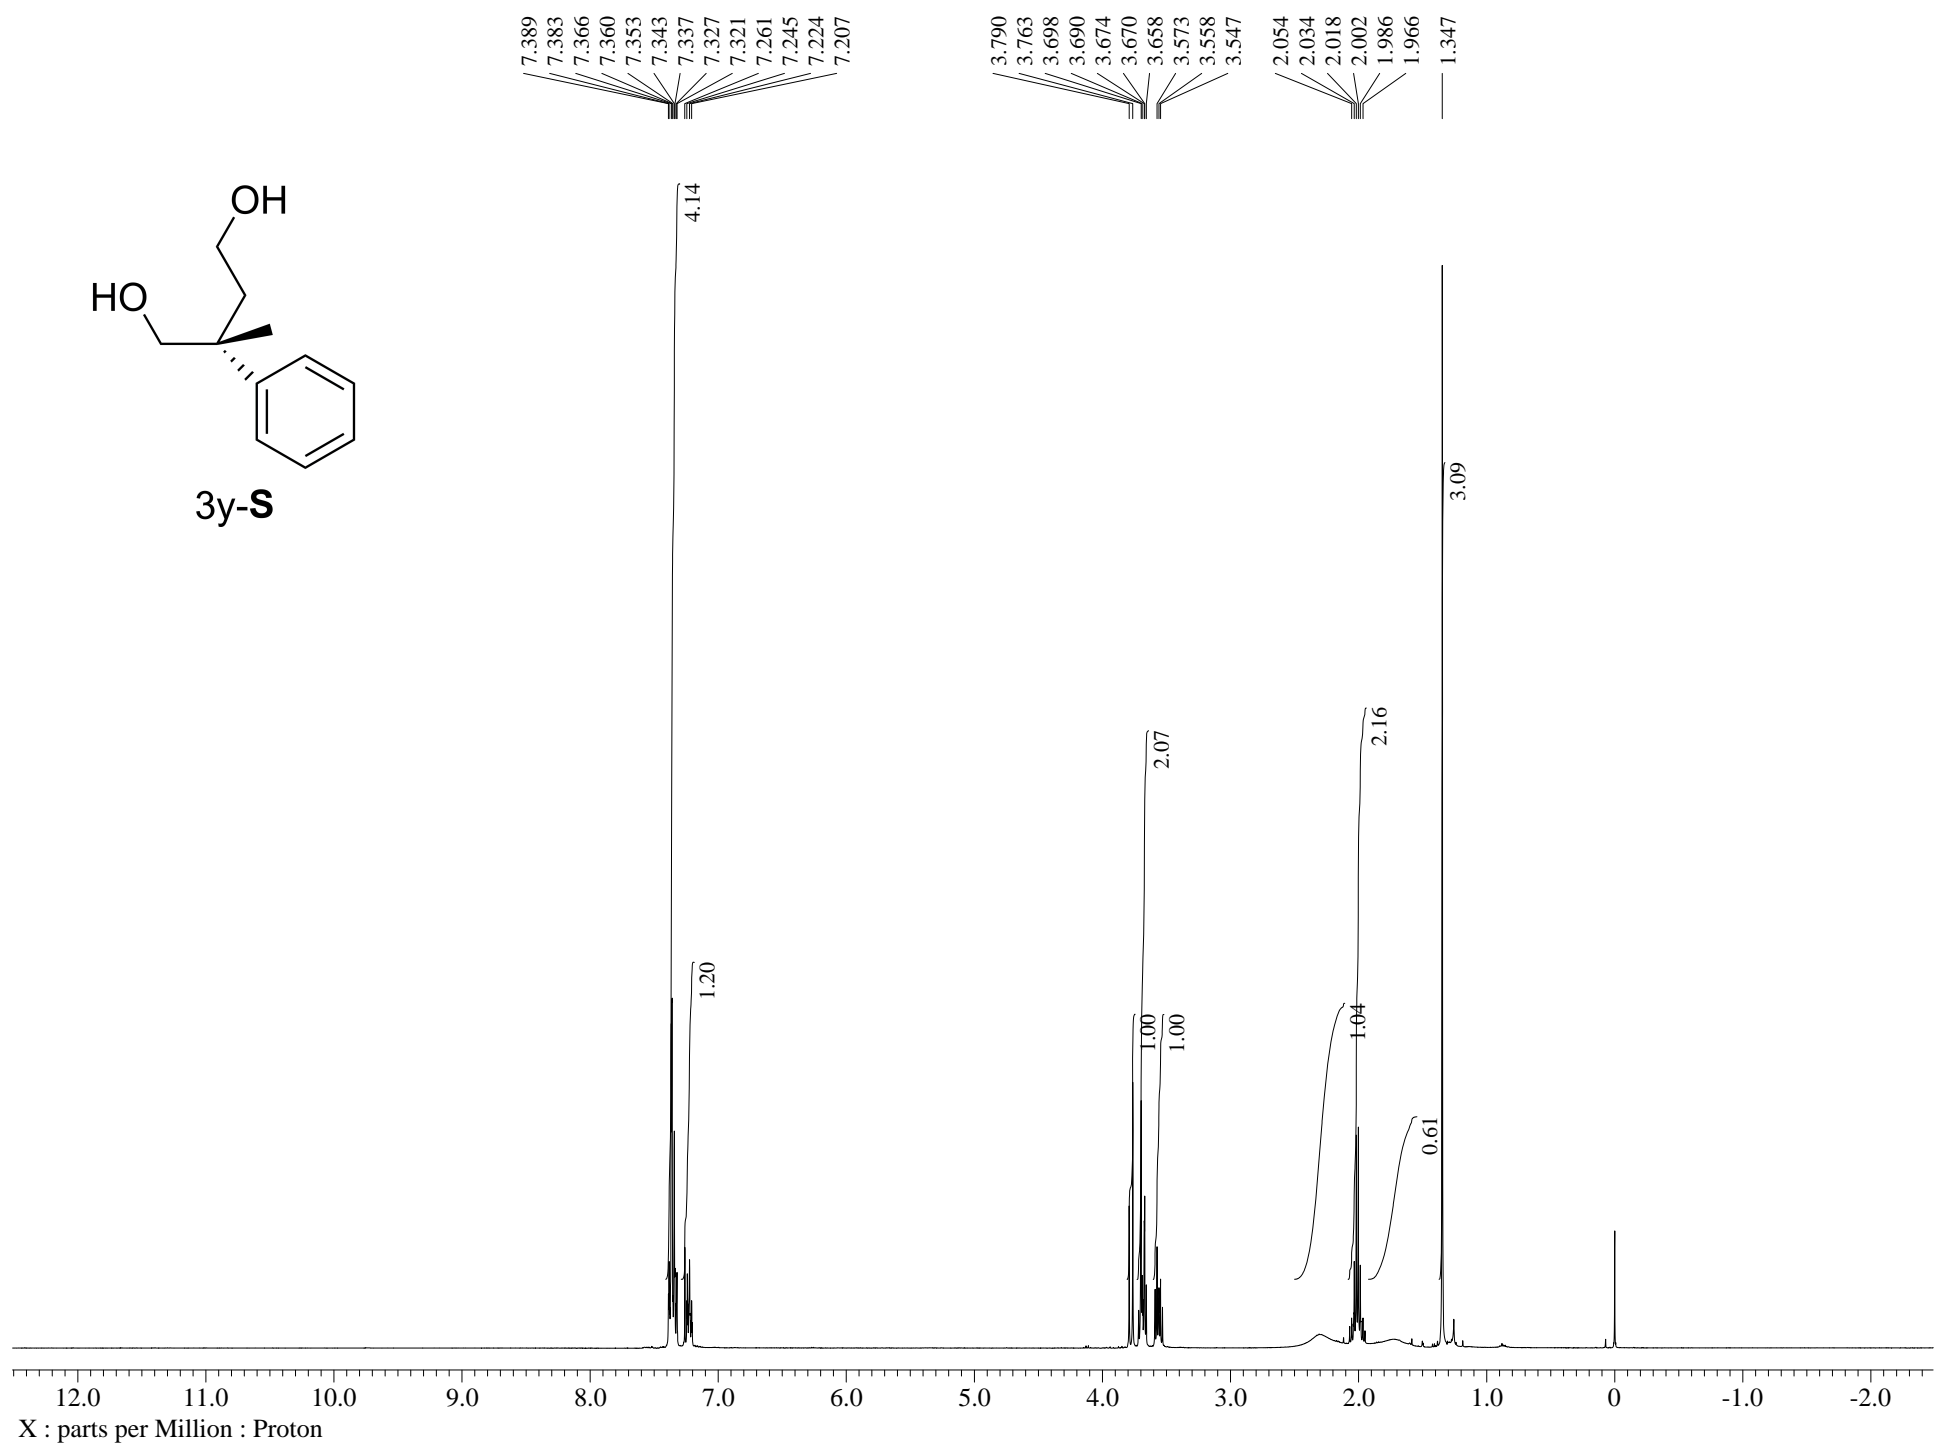

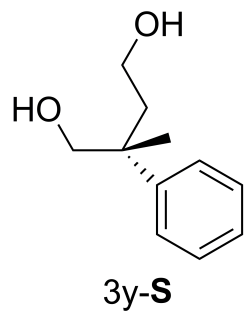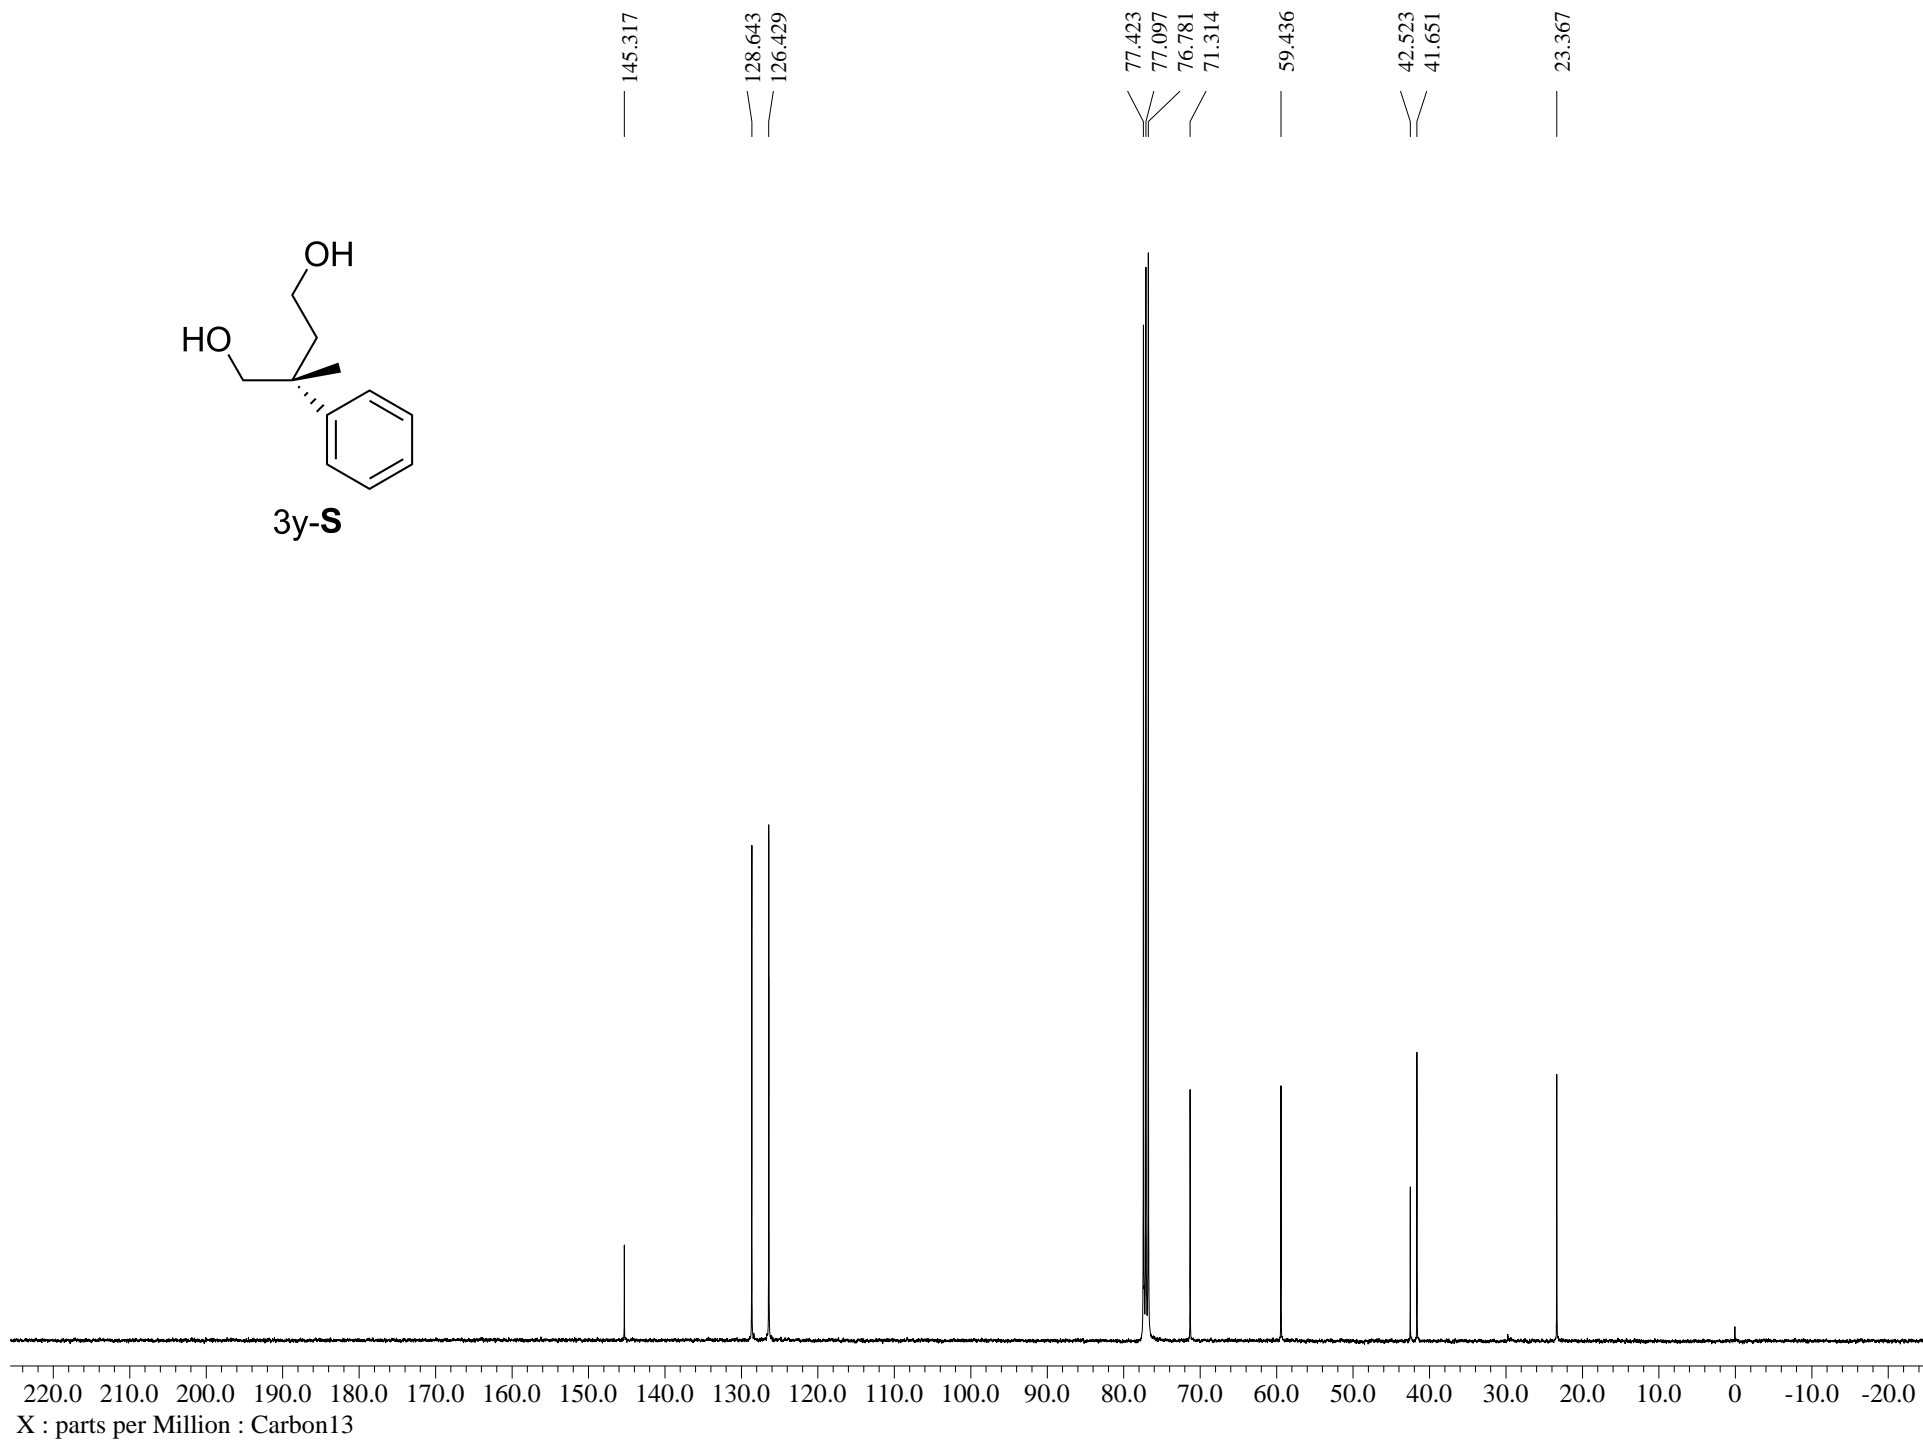

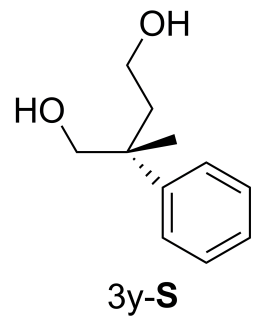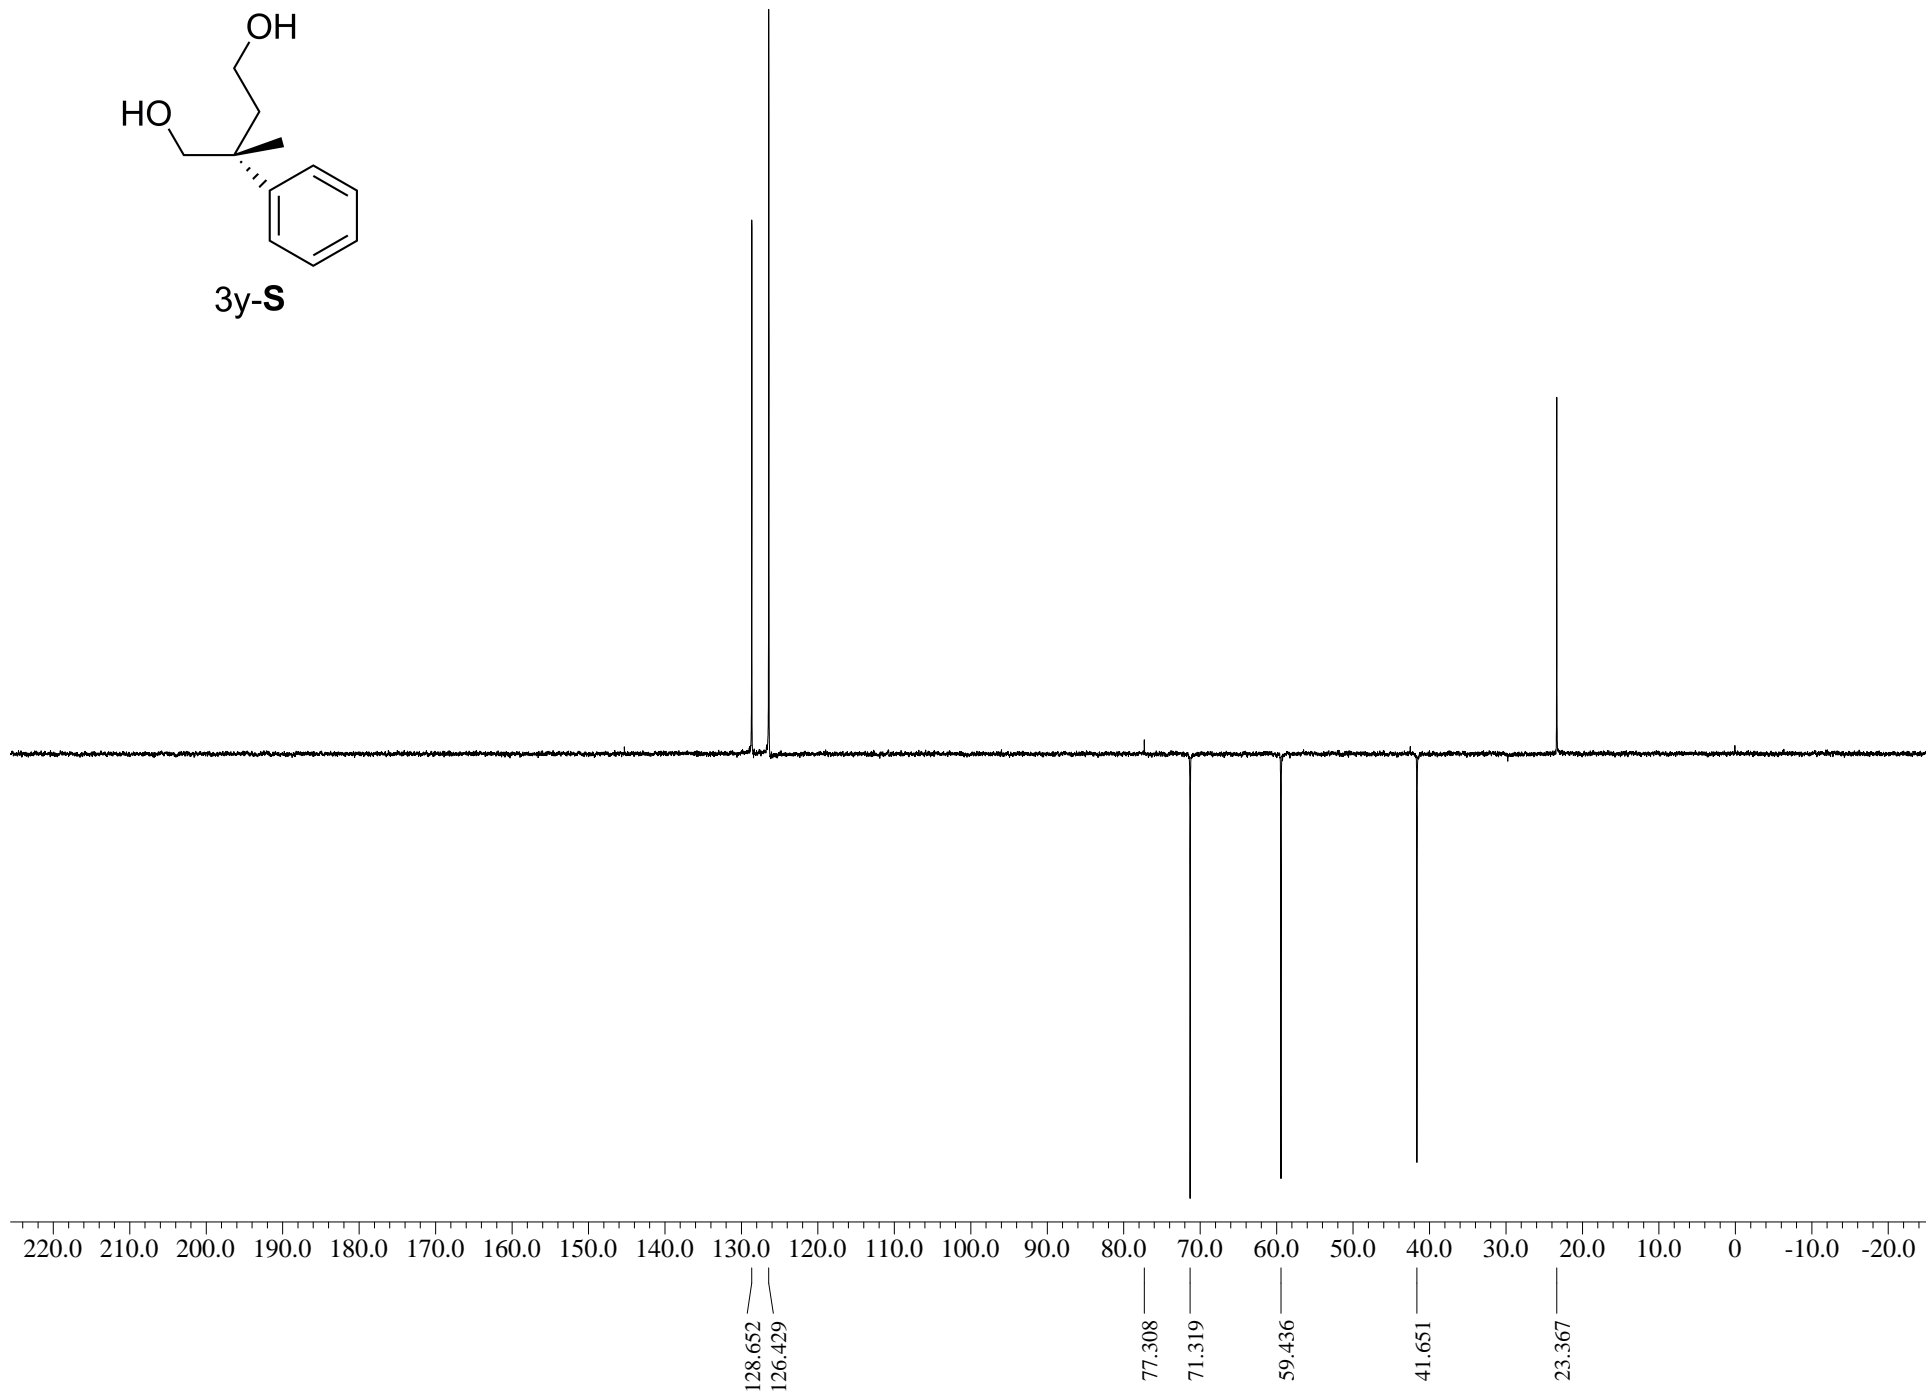

**(R)-4-(3-methoxyphenyl)-4-methyldihydrofuran-2(3H)-one: 3z**

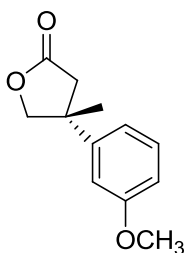

Synthesized according to General Procedure A from 4-Methylfuran-2(5H)-one **1d** (0.14 mmol, 13.7 mg) and 3-Methoxyphenyl boronic acid (0.28 mmol, 42.6 mg).

The crude product was purified by flash chromatography (Hexane: AcOEt = 20: 1) to yield **3z** (18.2 mg, 63%, 95% ee) as a colorless solid.

m.p. = 65 - 66 °C

**<sup>1</sup>H NMR** (400 MHz, Chloroform-*d*) δ 7.32 - 7.28 (m, 1H), 6.84 - 6.71 (m, 3H), 4.41 (d, *J* = 8.7 Hz, 1H), 4.38 (d, *J* = 8.7 Hz, 1H), 3.82 (s, 3H), 2.91 (d, *J* = 16.9 Hz, 1H), 2.65 (d, *J* = 16.5 Hz, 1H), 1.51 (s, 3H)

**<sup>13</sup>C NMR** (100 MHz, Chloroform-*d*) δ 176.2 (C), 160.1 (C), 146.0 (C), 130.2 (CH), 117.5 (CH), 112.1 (CH), 111.8 (CH), 78.4 (CH<sub>2</sub>), 55.4 (CH<sub>3</sub>), 44.2 (C), 42.1 (CH<sub>2</sub>), 28.1 (CH<sub>3</sub>)

**HRMS** (ESI-TOF) *m/z* Calculated for C<sub>12</sub>H<sub>14</sub>O<sub>3</sub>Na [M+Na]<sup>+</sup>: 229.0841, found: 229.0845

[α]<sub>D</sub><sup>24</sup> = +13.7 (c 0.29, CHCl<sub>3</sub>) for a 95% ee

Chiral HPLC analysis on a CHIRALPAK AD-H column, Hexane: *i*PrOH = 9: 1, 40 °C, flow = 0.5 ml/min, UV detection at 223 nm, retention times (min): 11 (minor) and 13.4 (major).

**Racemic sample:**

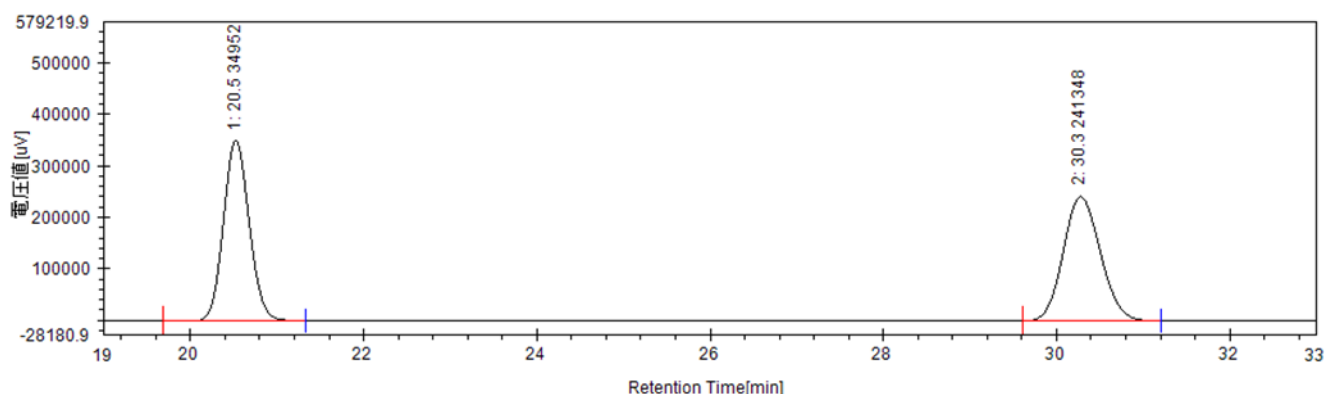

| Peak | Rt[min] | Height [uV] | Area [uV*min] | Area % | NTP     | Symmetry factor | Resolution |
|------|---------|-------------|---------------|--------|---------|-----------------|------------|
| 1    | 20.5    | 349522      | 119847.3      | 49.929 | 22808.3 | 1.092           | ***        |
| 2    | 30.3    | 241348      | 120189.9      | 50.071 | 23365.6 | 1.121           | 14.636     |



### Enantiomeric sample (3z):

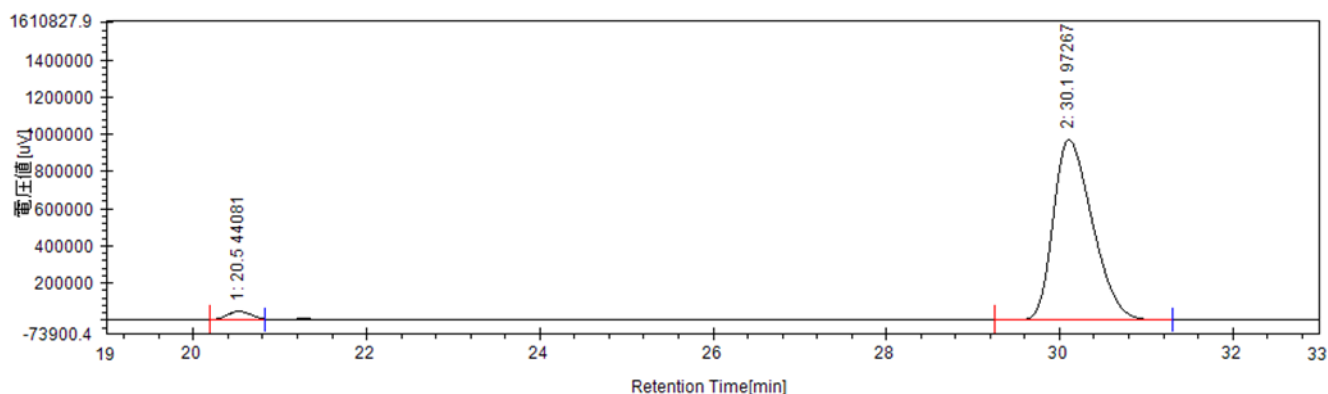

| Peak | Rt[min] | Height [uV] | Area [uV*min] | Area % | NTP     | Symmetry factor | Resolution |
|------|---------|-------------|---------------|--------|---------|-----------------|------------|
| 1    | 20.5    | 44081       | 13553.3       | 2.6    | 26110.1 | 0.98            | ***        |
| 2    | 30.1    | 972676      | 507677        | 97.4   | 20970.4 | 1.351           | 14.344     |

### (*R*)-4-(4-methoxyphenyl)-4-methyldihydrofuran-2(3H)-one: **3aa**<sup>14</sup>

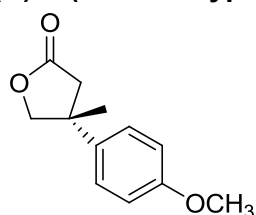

Synthesized according to General Procedure A from 4-Methylfuran-2(5H)-one **1d** (0.14 mmol, 13.7 mg) and 4-Methoxyphenyl boronic acid (0.28 mmol, 42.6 mg). The crude product was purified by flash chromatography (Hexane: AcOEt = 20: 1) to yield **3aa** (25.7 mg, 89%, 90% ee) as a colorless solid.

m.p. = 66 - 67 °C

**<sup>1</sup>H NMR** (400 MHz, Chloroform-*d*)  $\delta$  7.11 (d,  $J$  = 8.7 Hz, 2H), 6.90 (d,  $J$  = 8.7 Hz, 2H), 4.39 (d,  $J$  = 8.7 Hz, 1H), 4.36 (d,  $J$  = 8.7 Hz, 1H), 3.81 (s, 3H), 2.88 (d,  $J$  = 16.9 Hz, 1H), 2.64 (d,  $J$  = 16.4 Hz, 1H), 1.50 (s, 3H)

**<sup>13</sup>C NMR** (100 MHz, Chloroform-*d*)  $\delta$  176.4 (C), 158.7 (C), 136.4 (C), 126.3 (CH), 114.4 (CH), 78.8 (CH<sub>2</sub>), 55.4 (CH<sub>3</sub>), 43.6 (C), 42.4 (CH<sub>2</sub>), 28.0 (CH<sub>3</sub>)

**HRMS** (ESI-TOF)  $m/z$  Calculated for C<sub>12</sub>H<sub>14</sub>O<sub>3</sub>Na [M+Na]<sup>+</sup>: 229.0841, found: 229.0846

$[\alpha]_D^{25}$  = +9.97 ( $c$  0.48, CHCl<sub>3</sub>) for a 90% ee

Chiral HPLC analysis on a CHIRALPAK AD-H column, Hexane: *i*PrOH = 9: 1, 40 °C, flow = 0.5 ml/min, UV detection at 225 nm, retention times (min): 19.9 (minor) and 21.4 (major).

The absolute configuration was determined by comparison of the optical rotation with literature value.<sup>14</sup>

**Racemic sample:**

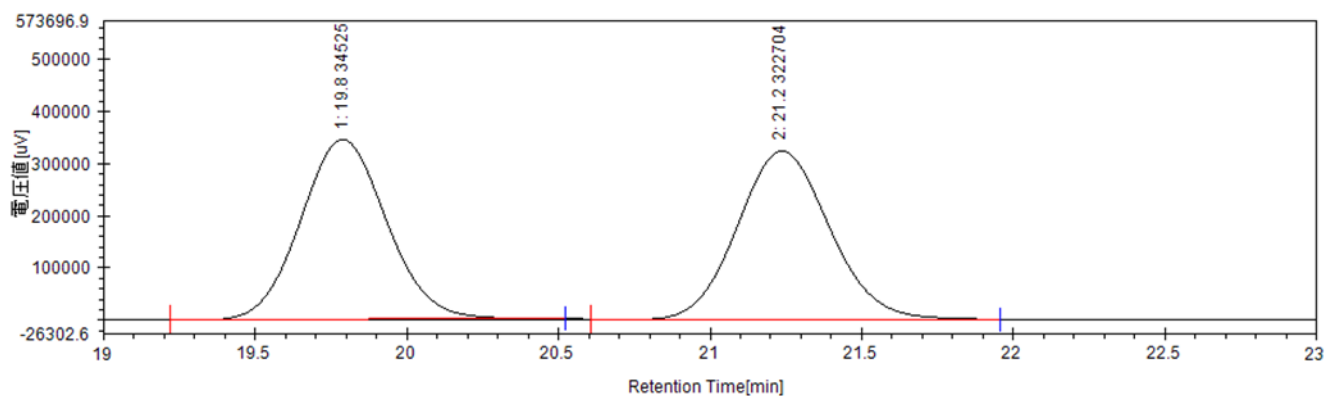

| Peak | Rt[min] | Height [uV] | Area [uV*min] | Area % | NTP     | Symmetry factor | Resolution |
|------|---------|-------------|---------------|--------|---------|-----------------|------------|
| 1    | 19.8    | 345259      | 113931        | 50.074 | 23147.6 | 1.058           | ***        |
| 2    | 21.2    | 322704      | 113596        | 49.926 | 23278.5 | 1.1             | 2.684      |

**Enantiomeric sample (3aa):**

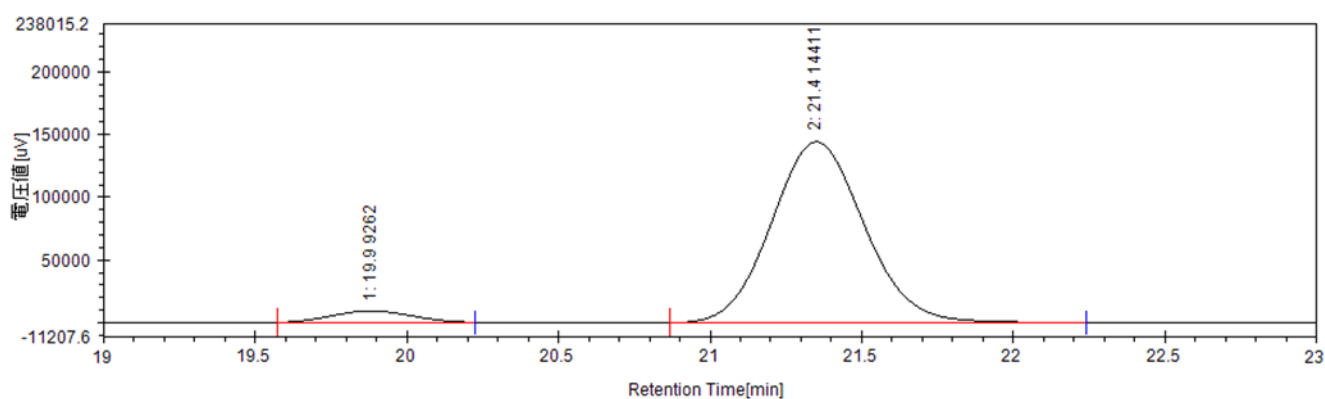

| Peak | Rt[min] | Height [uV] | Area [uV*min] | Area % | NTP     | Symmetry factor | Resolution |
|------|---------|-------------|---------------|--------|---------|-----------------|------------|
| 1    | 19.9    | 9262        | 2830.3        | 5.236  | 25216.2 | 1.041           | ***        |
| 2    | 21.4    | 144113      | 51224.8       | 94.764 | 23368.5 | 1.085           | 2.776      |

### (2S,3R)-2-methyl-3-phenylcyclopentanone: **3ab**<sup>15</sup>

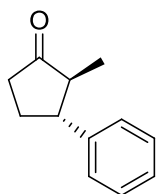

Synthesized according to General Procedure A from 2-Methyl-2-cyclopenten-1-one **1e** (0.14 mmol, 13.7 mg) and Phenyl boronic acid (0.28 mmol, 34.2 mg). The crude product was purified by flash chromatography (Hexane: AcOEt = 20: 1) to yield **3ab** as mixture of *trans* and *cis* isomer (19.0 mg, 78%, 18% ee as *trans* isomer) as a colorless oil.

**<sup>1</sup>H NMR** (400 MHz, Chloroform-*d*)  $\delta$  7.38 - 7.25 (m, 5H), 2.85 - 2.77 (m, 1H), 2.60 - 2.51 (m, 1H), 2.36 - 2.20 (m, 3H), 2.01- 1.89 (m, 1H), 1.04 (d, *J* = 6.86 Hz, 3H: *trans* isomer), 0.79 (d, *J* = 7.32 Hz, 3H: *cis* isomer)

**<sup>13</sup>C NMR** (100 MHz, Chloroform-*d*)  $\delta$  219.7 (C), 142.4 (C), 128.8 (CH), 127.2 (CH), 127.0 (CH), 51.5 (CH), 51.1 (CH), 37.8 (CH<sub>2</sub>), 29.7 (CH<sub>2</sub>), 12.3 (CH<sub>3</sub>)

**HRMS** (ESI-TOF) *m/z* Calculated for C<sub>12</sub>H<sub>14</sub>ONa [M+Na]<sup>+</sup>: 197.0942, found: 197.0947

Chiral HPLC analysis on a CHIRALPAK OJ-H column, Hexane: *i*PrOH = 99: 1, 40 °C, flow = 1.0 ml/min, UV detection at 210 nm, retention times (min): 12.3 (major of *trans* isomer) and 13 (minor of *trans* isomer)

#### Racemic sample:

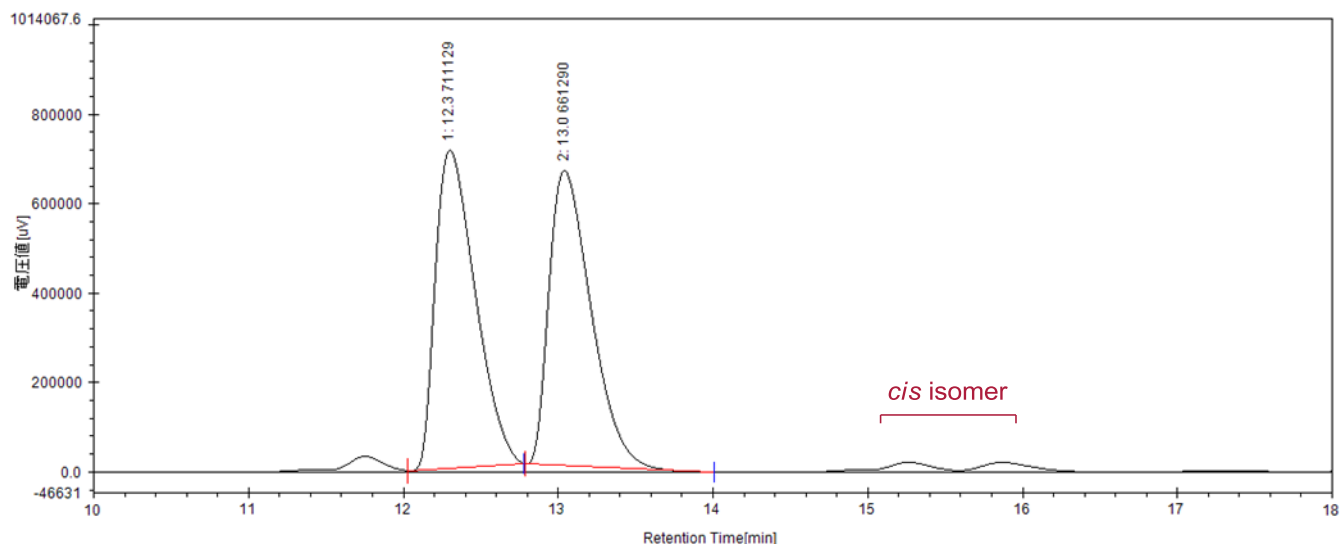

| Peak | Rt[min] | Height [uV] | Area [uV*min] | Area % | NTP     | Symmetry factor | Resolution |
|------|---------|-------------|---------------|--------|---------|-----------------|------------|
| 1    | 12.3    | 711129      | 212061.7      | 50.512 | 10330.5 | 1.592           | ***        |
| 2    | 13      | 661290      | 207764.1      | 49.488 | 10849.2 | 1.602           | 1.51       |

### Enantiomeric sample (3ab):

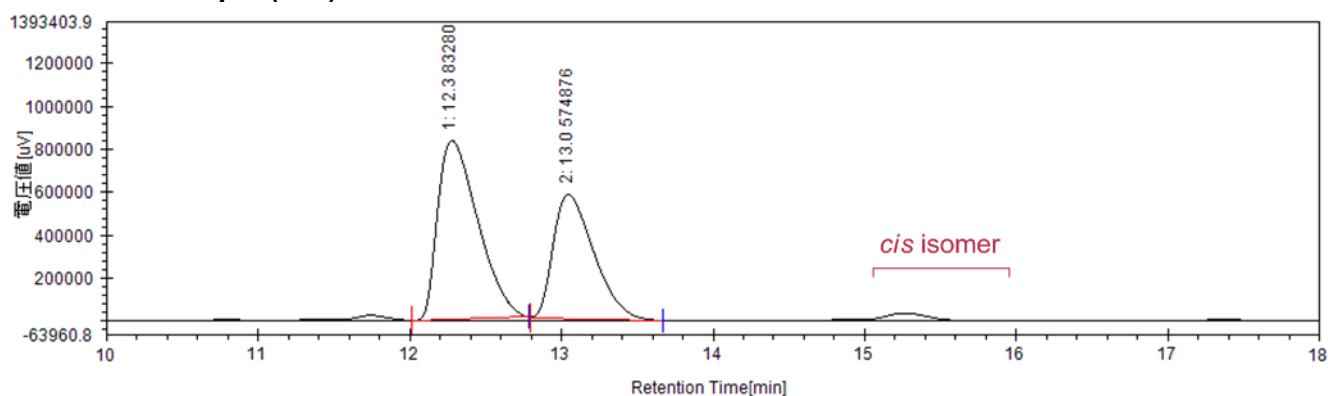

| Peak | Rt[min] | Height [uV] | Area [uV*min] | Area % | NTP     | Symmetry factor | Resolution |
|------|---------|-------------|---------------|--------|---------|-----------------|------------|
| 1    | 12.3    | 832528      | 255348        | 58.923 | 9756.4  | 1.676           | ***        |
| 2    | 13      | 574845      | 178011.1      | 41.077 | 11035.3 | 1.585           | 1.547      |

### (S)-3-(2-methoxyphenyl)-4,4-dimethylcyclohexanone: 3ac

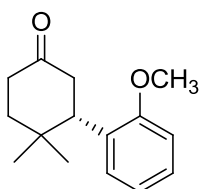

Synthesized according to General Procedure A from 4,4-Dimethyl-2-cyclohexen-1-one **1f** (0.14 mmol, 17.4 mg) and 2-Methoxyphenyl boronic acid (0.28 mmol, 42.6 mg). The crude product was purified by flash chromatography (Hexane: AcOEt = 20 : 1) to yield **3ac** (27.9 mg, 86%, 94% ee) as a colorless oil.

**<sup>1</sup>H NMR** (400 MHz, Chloroform-*d*)  $\delta$  7.23 - 7.19 (m, 1H), 7.10 - 7.08 (m, 1H), 6.94 - 6.86 (m, 2H), 3.78 (s, 3H), 2.83 - 2.27 (m, 4H), 1.82 - 1.79 (m, 2H), 1.03 (s, 3H), 0.87 (s, 3H)

**<sup>13</sup>C NMR** (100 MHz, Chloroform-*d*)  $\delta$  212.1 (C), 157.3 (C), 129.9 (C), 128.3 (CH), 127.6 (CH), 120.1 (CH), 110.6 (CH), 55.3 (CH<sub>3</sub>), 43.8 (CH<sub>2</sub>), 42.0 (C), 40.6 (CH<sub>2</sub>), 38.5 (CH<sub>2</sub>), 34.5 (C), 28.5 (CH<sub>3</sub>), 20.0 (CH<sub>3</sub>)

**HRMS** (ESI-TOF) *m/z* Calculated for C<sub>15</sub>H<sub>20</sub>O<sub>2</sub>Na [M+Na]<sup>+</sup>: 255.1361, found: 255.1364

$[\alpha]_D^{24} = -98.9$  (c 0.31, CHCl<sub>3</sub>) for a 94% ee

Chiral HPLC analysis on a CHIRALPAK AS-H column, Hexane: *i*PrOH = 99: 1, 40 °C, flow = 1.0 ml/min, UV detection at 254 nm, retention times (min): 21.2 (major) and 29.7 (minor).

**Racemic sample:**

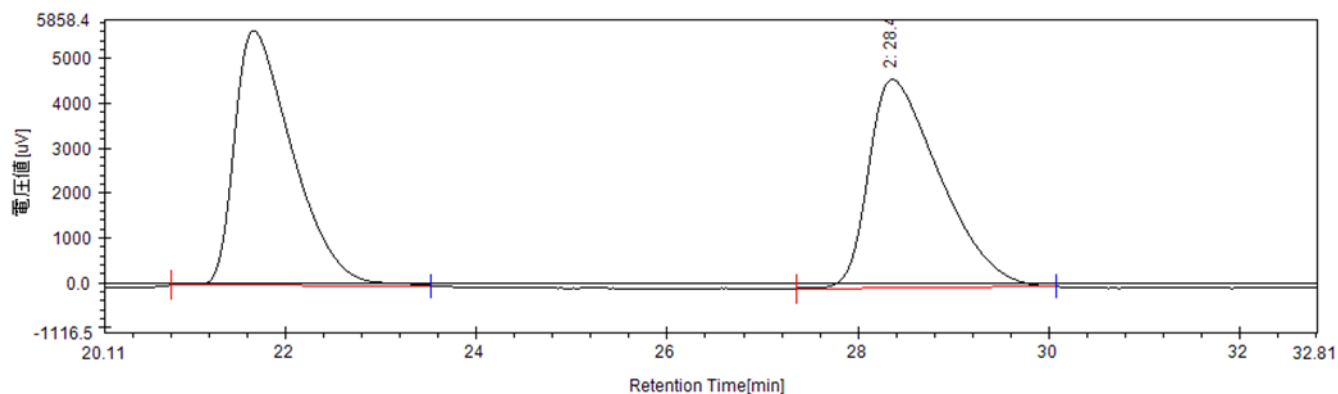

| Peak | Rt [min] | Height [uV] | Area [uV*min] | Area % | NTP    | Symmetry factor | Resolution |
|------|----------|-------------|---------------|--------|--------|-----------------|------------|
| 1    | 21.7     | 5678        | 3989.9        | 49.873 | 6198.8 | 1.761           | ***        |
| 2    | 28.4     | 4638        | 4010.2        | 50.127 | 6856.6 | 1.681           | 5.431      |

**Enantiomeric sample (3ac):**

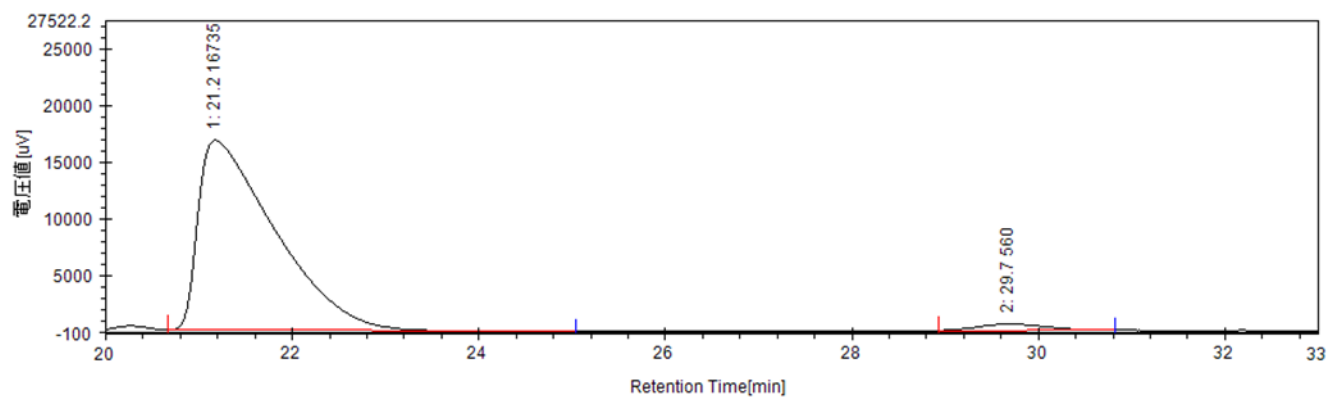

| Peak | Rt [min] | Height [uV] | Area [uV*min] | Area % | NTP    | Symmetry factor | Resolution |
|------|----------|-------------|---------------|--------|--------|-----------------|------------|
| 1    | 21.2     | 16735       | 15931         | 97.16  | 3176.2 | 2.803           | ***        |
| 2    | 29.7     | 560         | 465.6         | 2.84   | 7802.6 | 1.198           | 5.993      |

### (R)-4-(4-methoxyphenyl)-4-phenylpentan-2-one: **5**<sup>17</sup>

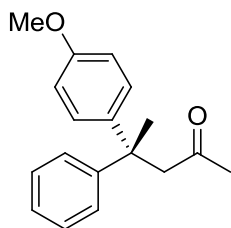

Synthesized according to General Procedure A from (*E*)-4-Phenylpent-3-en-2-one **4** (0.14 mmol, 22.4 mg) and 4-Methoxyphenyl boronic acid (0.28 mmol, 42.6 mg). The crude product was purified by flash chromatography (Hexane: AcOEt = 30: 1) to yield **5** (5.2 mg, 14%, 40% ee) as a colorless oil.

**<sup>1</sup>H NMR** (400 MHz, Chloroform-*d*)  $\delta$  7.29 - 7.25 (m, 3H), 7.20 - 7.17 (m, 2H), 7.12 - 7.08 (m, 2H), 6.83 - 6.79 (m, 2H), 3.79 (s, 3H), 3.20 (q,  $J = 0$ , 14.2 Hz), 1.77 (s, 3H), 1.69 (s, 3H)

**<sup>13</sup>C NMR** (100 MHz, Chloroform-*d*)  $\delta$  208.3 (C), 157.8 (C), 149.0 (C), 140.7 (C), 128.4 (CH), 128.2 (CH), 127.0 (CH), 126.1 (CH), 113.5 (CH), 55.3 (CH<sub>3</sub>), 54.8 (CH<sub>2</sub>), 45.1 (C), 32.2 (CH<sub>3</sub>), 28.0 (CH<sub>3</sub>)

\*The NMR data match with those reported in literature.<sup>17</sup>

**HRMS** (ESI-TOF)  $m/z$  Calculated for C<sub>18</sub>H<sub>20</sub>O<sub>2</sub>Na [M+Na]<sup>+</sup>: 291.1361, found: 291.1366

$[\alpha]_D^{22} = +6.8$  (c 0.21, CHCl<sub>3</sub>) for a 40% ee, (Lit.<sup>17</sup>  $[\alpha]_D^{20} = +13$  (c 0.29, CHCl<sub>3</sub>) for a 96% ee: *S* isomer)

Chiral HPLC analysis on a CHIRALPAK AD-H column, Hexane: *i*PrOH = 99: 1, 40 °C, flow = 0.5 ml/min, UV detection at 220 nm, retention times (min): 24.5 (major) and 27.4 (minor).

The absolute configuration was determined by comparison of the optical rotation with literature value.<sup>17</sup>

### Racemic sample:

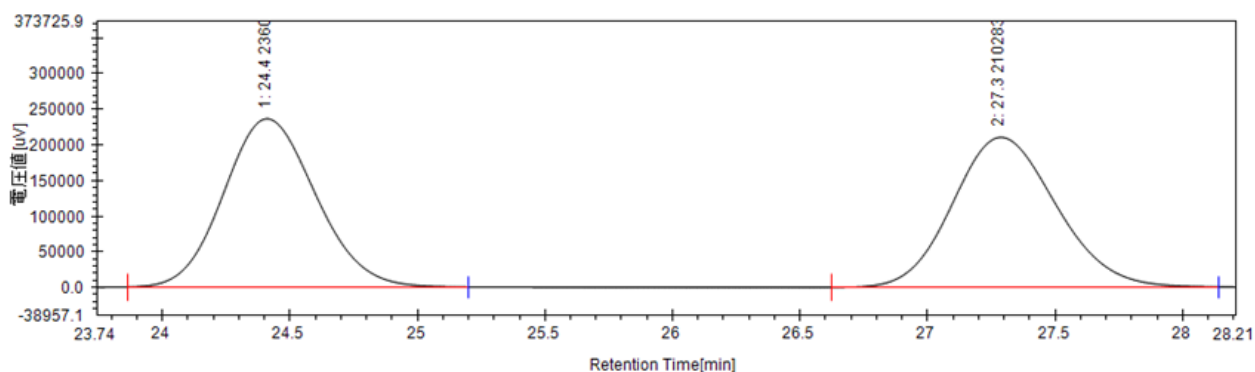

| Peak | Rt [min] | Height [uV] | Area [uV*min] | Area % | NTP     | Symmetry factor | Resolution |
|------|----------|-------------|---------------|--------|---------|-----------------|------------|
| 1    | 24.4     | 236014      | 98786.7       | 49.921 | 21604.6 | 1.113           | ***        |
| 2    | 27.3     | 210283      | 99100.3       | 50.079 | 21314   | 1.13            | 4.084      |

### Enantiomeric sample (5):

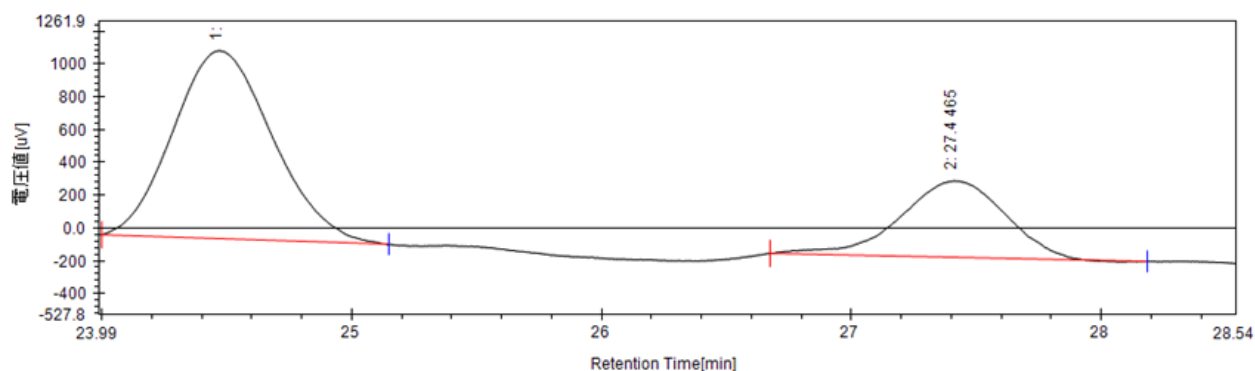

| Peak | Rt [min] | Height [uV] | Area [uV*min] | Area % | NTP     | Symmetry factor | Resolution |
|------|----------|-------------|---------------|--------|---------|-----------------|------------|
| 1    | 24.5     | 1146        | 528.8         | 70.147 | 17586.6 | 1.144           | ***        |
| 2    | 27.4     | 465         | 225           | 29.853 | 20735.9 | 0.869           | 3.934      |

### III. References

- 1 M. Yoshida, Y. Shoji, K. Shishido, *Org. Lett.*, 2009, **11**, 1441.
- 2 A. Abad, C. Agulló, A. CCuñat, D. Jiménez and R. H Perni, *Tetrahedron*, 2001, **57**, 9727.
- 3 (a) Y. Aye, S. G. Davies, A. C. Garner, P. M. Roberts, A. D. Smith and J. E. Thomson, *Org. Biomol. Chem.*, 2008, **6**, 2195; (b) T. Kawaji, N. Shohji, K. Miyashita and S. Okamoto, *Chem. Commun.*, 2011, **47**, 7857.
- 4 D. P. Schwinger, M. T. Peschel, C. Jaschke, C. Jandl, R. de Vivie-Riedle and T. Bach, *J. Org. Chem.*, 2022, **87**, 4838.
- 5 V. Sharma, G. T. Kelly and C. M. H. Watanabe, *Org. Lett.*, 2008, **10**, 4815.
- 6 W. Liu, S. Rajkumar, W. Wu, Z. Huang and X. Yang, *Org. Lett.*, 2019, **21**, 3563.
- 7 (a) J. Buter, R. Moezelaar and A. J. Minnaard, *Org. Biomol. Chem.*, 2014, **12**, 5883; (b) T. L. May, M. K. Brown and A. H. Hoveyda, *Angew. Chem., Int. Ed.*, 2008, **47**, 7358.
- 8 J. Buter, D. Heijnen, C. Vila, V. Hornillos, E. Otten, M. Giannerini, A. J. Minnaard and B. L. Feringa, *Angew. Chem., Int. Ed.*, 2016, **55**, 3620.
- 9 (a) J. C. Holder, E. D. Goodman, K. Kikushima, M. Gatti, A. N. Marziale and B. M. Stoltz, *Tetrahedron*, 2015, **71**, 5781; (b) K. Kikushima, J. C. Holder, M. Gatti and B. M. Stoltz, *J. Am. Chem. Soc.*, 2011, **133**, 6902; (c) A. L. Gottumukkala, K. Matcha, M. Lutz, J. G. de Vries and A. J. Minnaard, *Chem. - Eur. J.*, 2012, **18**, 6907; (d) C. Hawner, K. Li, V. Cirriez and A. Alexakis, *Angew. Chem., Int. Ed.*, 2008, **47**, 8211; (e) C. Hawner, D. Müller, L. Gremaud, A. Felouat, S.

- Woodward and A. Alexakis, *Angew. Chem., Int. Ed.*, 2010, **49**, 7769.
- 10 J. Bartáček, J. Váňa, P. Drabina, J. Svoboda, M. Kocúrik and M. Sedlák, *Reactive & Functional Polymers*, 2020, **153**, 104615.
- 11 (a) J. C. Holder, L. Zou, A. N. Marziale, P. Liu, Y. Lan, M. Gatti, K. Kikushima, K. N. Houk and B. M. Stoltz, *J. Am. Chem. Soc.*, 2013, **135**, 14996; (b) R. Shintani, M. Takeda, T. Nishimura and T. Hayashi, *Angew. Chem., Int. Ed.*, 2010, **49**, 3969; (c) K.-S. Lee, M. K. Brown, A. W. Hird, and A. H. Hoveyda, *J. Am. Chem. Soc.*, 2006, **128**, 7182; (d) R. Shintani, Y. Tsutsumi, M. Nagaosa, T. Nishimura and T. Hayashi, *J. Am. Chem. Soc.*, 2009, **131**, 13588.
- 12 C. Hawner, K. Li, Vi. Cirriez and A. Alexakis, *Angew. Chem., Int. Ed.*, 2008, **47**, 9176.
- 13 (a) S. Xu, Z. Wang, X. Zhang, X. Zhang and K. Ding, *Angew. Chem., Int. Ed.*, 2008, **47**, 2840; (b) M. Rodríguez-Mata, Eduardo Busto, I. Lavandera, V. Gotor-Fernández, V. Gotor, S. García-Cerrada, J. Mendiola, Ó. de Frutos and I. Collado, *Tetrahedron*, 2016, **72**, 7268; (c) A. L. Featherston, C. R. Shugrue, B. Q. Mercado and S. J. Miller, *ACS Catal.*, 2019, **9**, 242; (d) T. Honda, N. Kimura and M. Tsubuki, *Tetrahedron: Asymmetry*, 1993, **4**, 1475; (e) J. Qiu, S. Gao, C. Li, L. Zhang, Z. Wang, X. Wang and K. Ding, *Chem. Eur. J.*, 2019, **25**, 13874.
- 14 C. C. Oliveira, A. Pfaltz and C. R. D. Correia, *Angew. Chem., Int. Ed.*, 2015, **54**, 14036.
- 15 (a) A. Gao, X.-Y. Liu, C.-H. Ding and X.-L. Hou, *Synlett*, 2017, **28**, 2829; (b) J.-M. Speldrich, J. Christoffers, *Eur. J. Org. Chem.*, 2021, **2021**, 907.
- 16 A. Narczyk, M. Pieczykolan and S. Stecko, *Org. Biomol. Chem.*, 2018, **16**, 3921.
- 17 J. A. Dabrowski, M. T. Villaume and A. H. Hoveyda, *Angew. Chem., Int. Ed.*, 2013, **52**, 8156.



#### IV. $^1\text{H}$ NMR and $^{13}\text{C}$ NMR Spectra

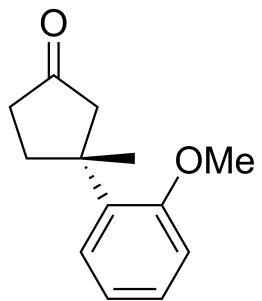

**3a**

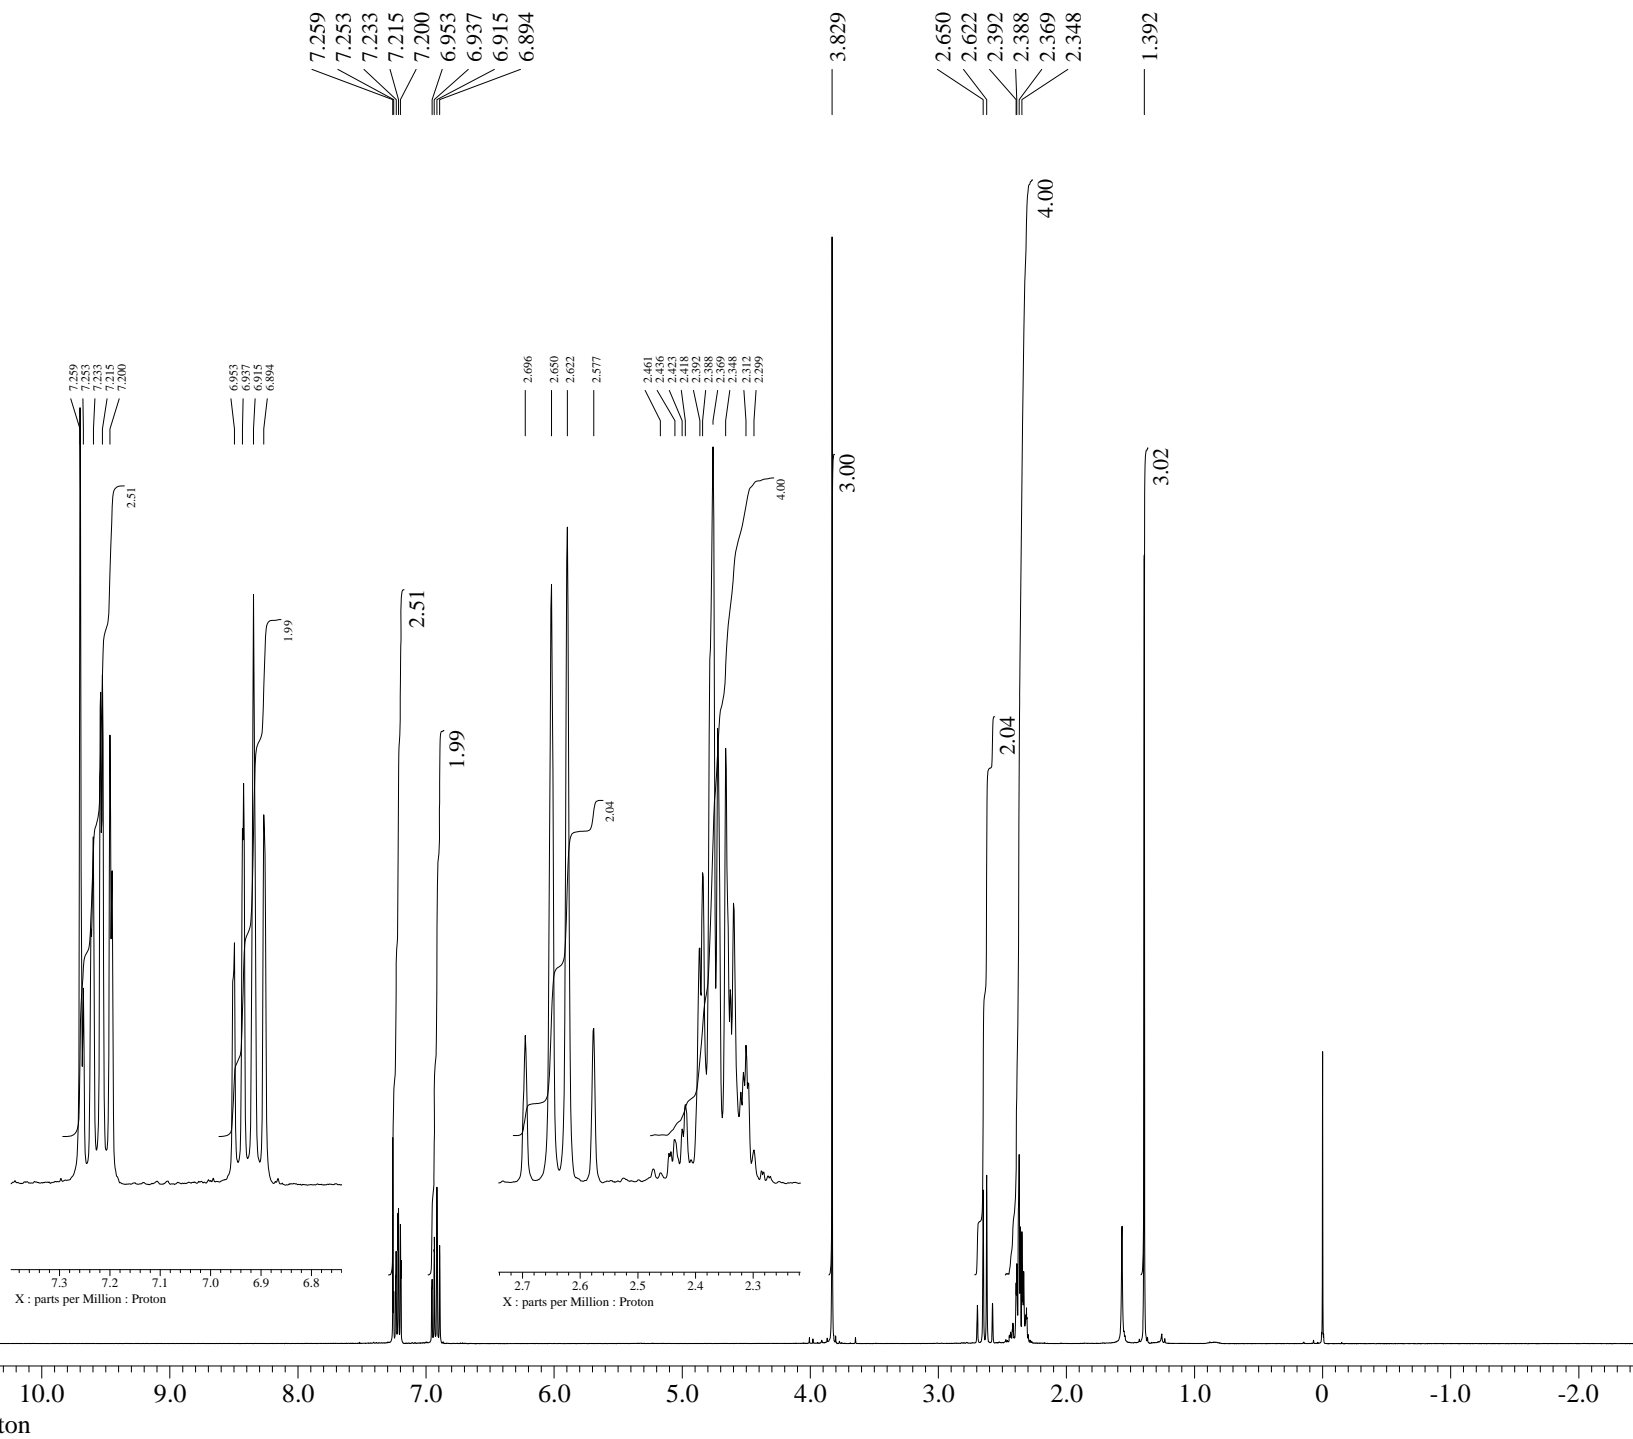

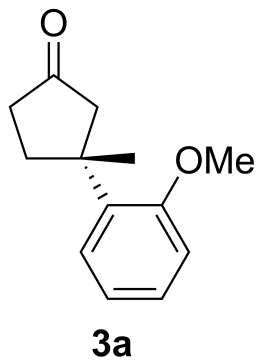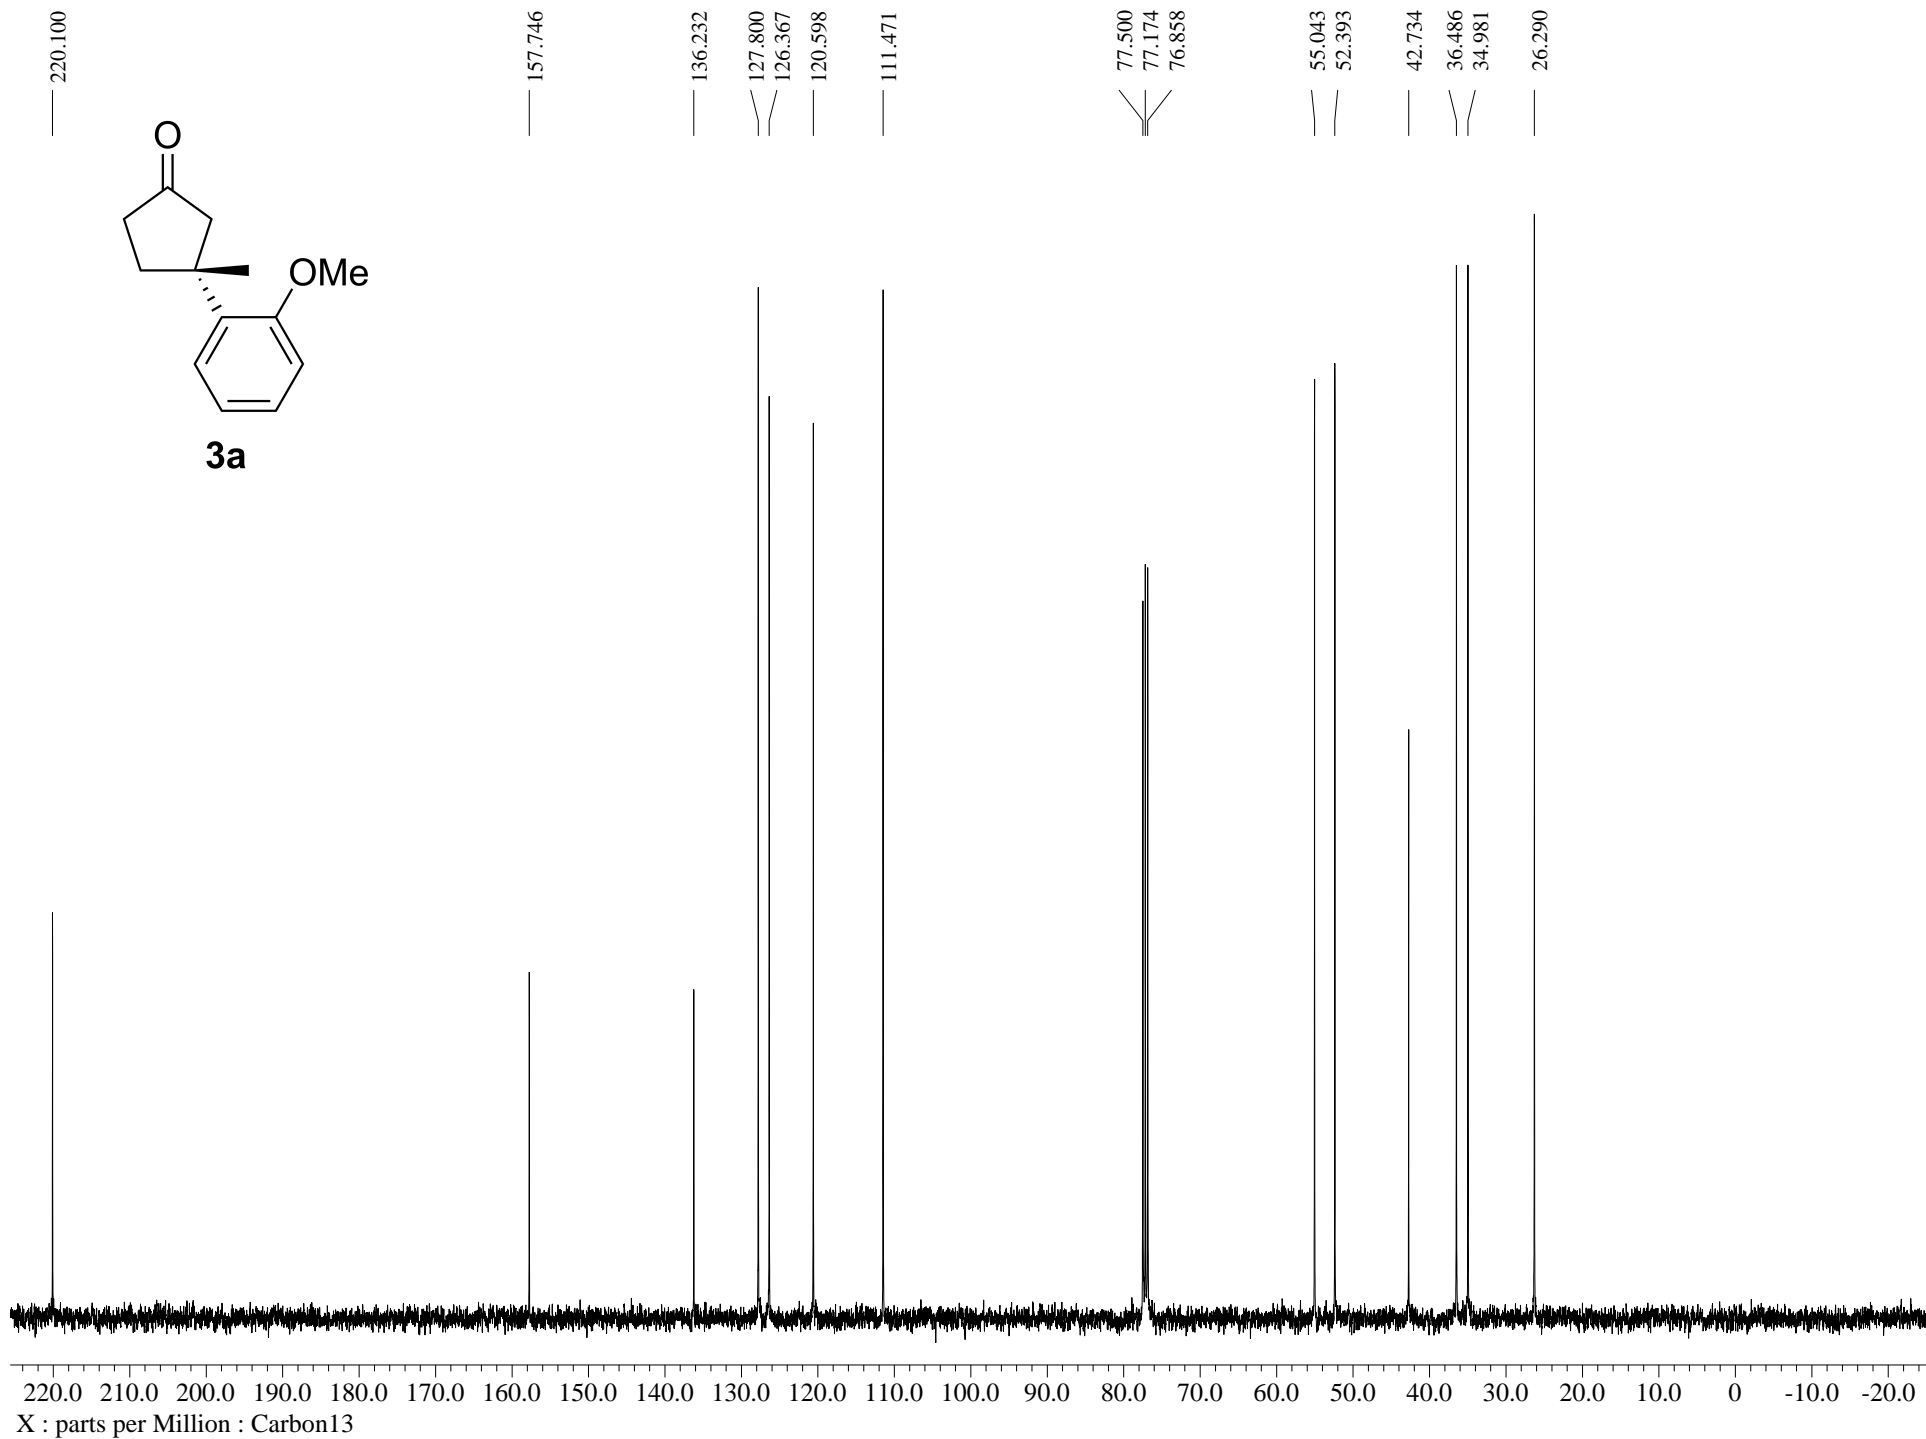

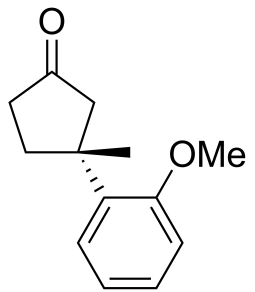

3a

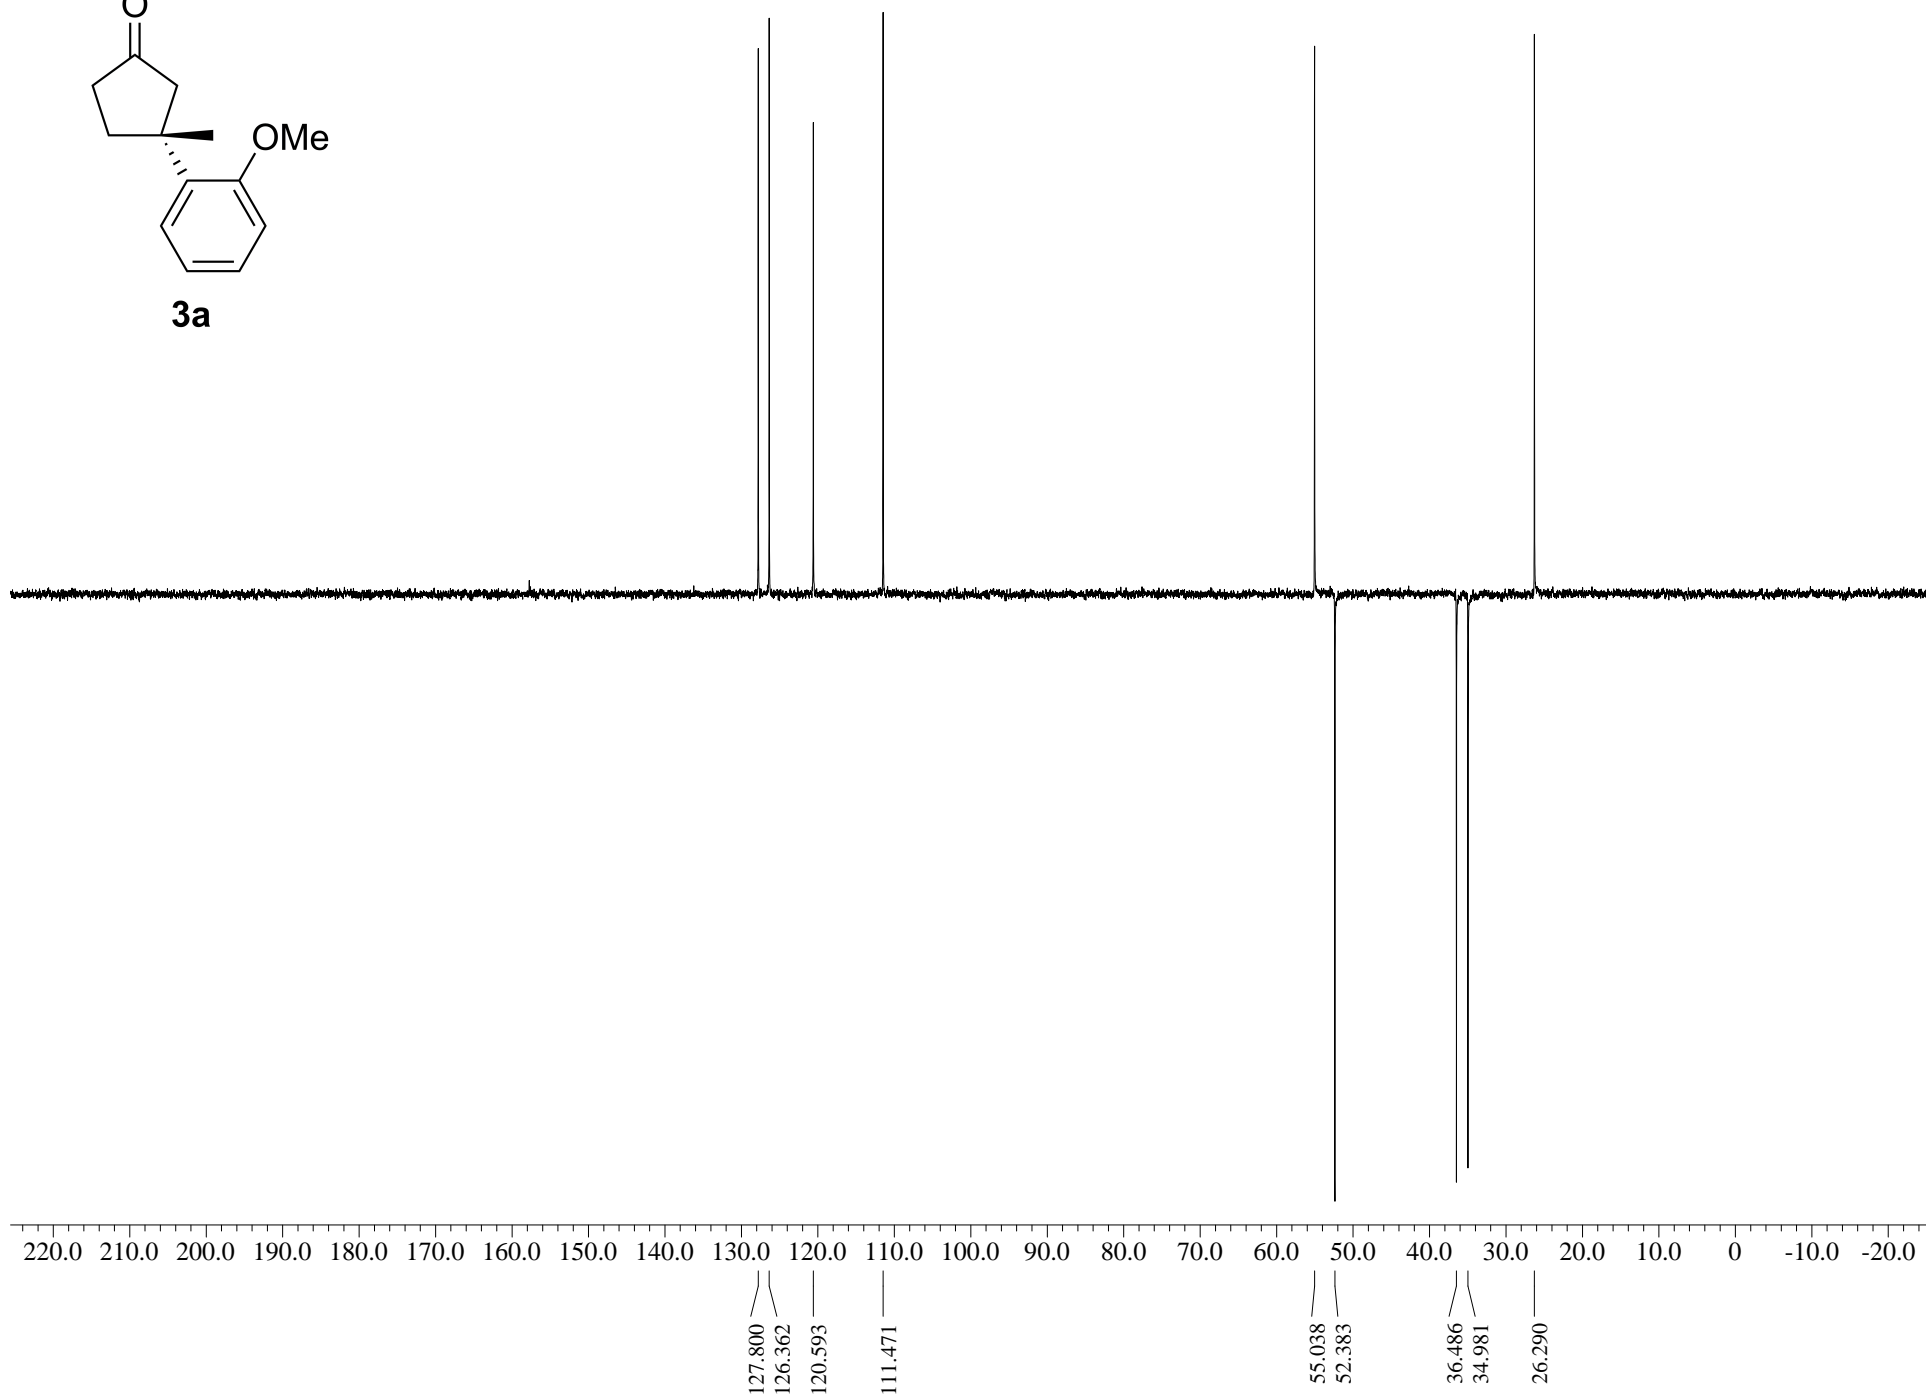

X : parts per Million : Carbon13

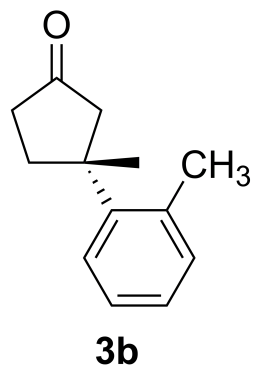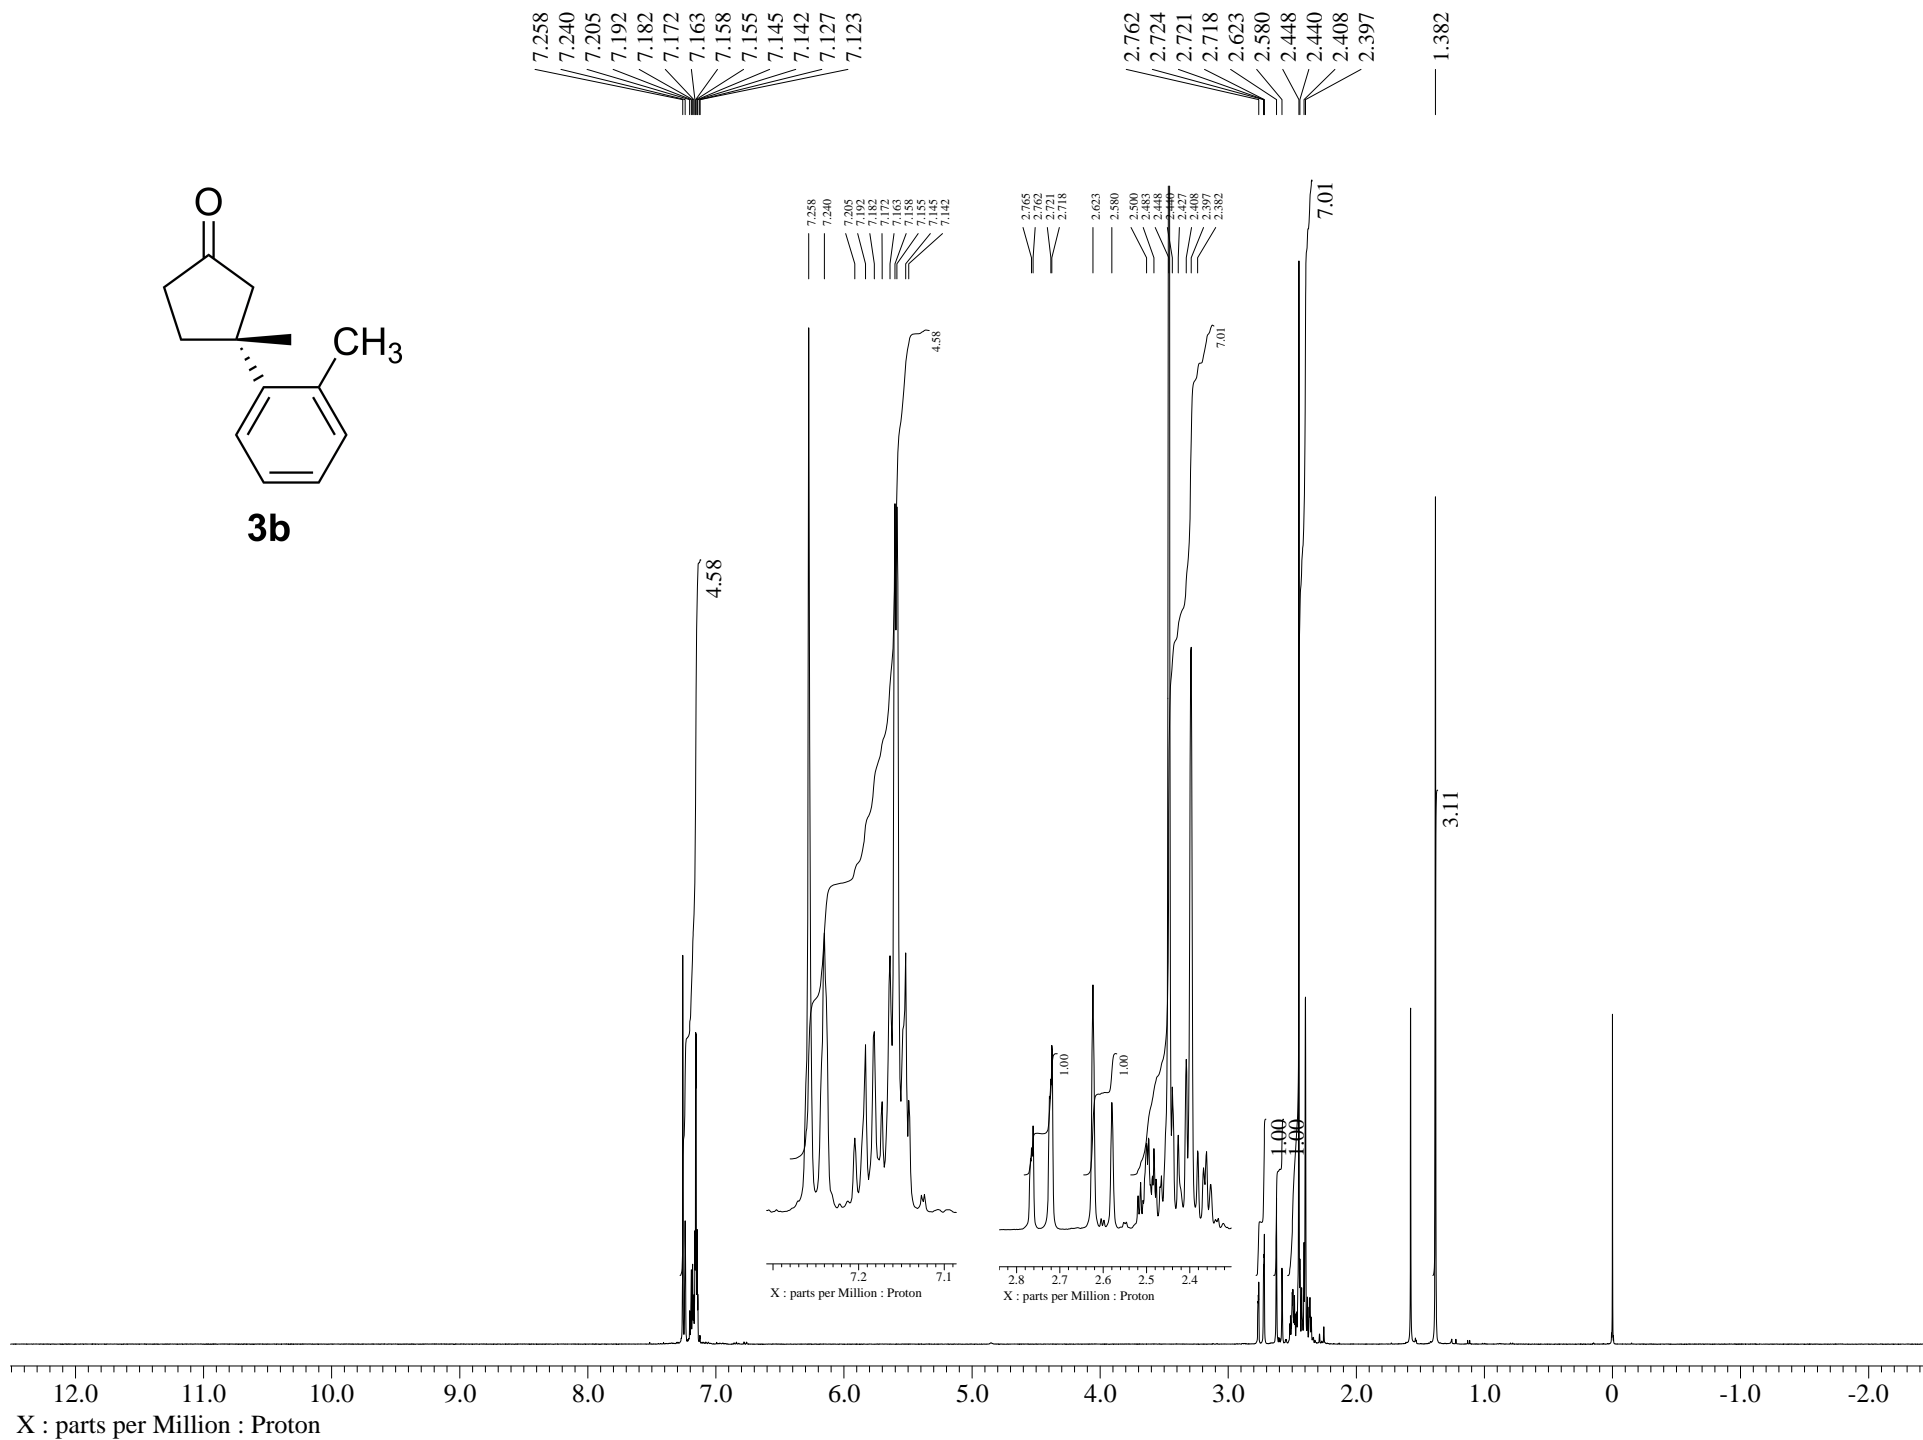

— 218.922

— 146.591

— 135.667

— 132.639

— 126.583

— 126.295

— 126.132

— 77.423

— 77.112

— 76.781

— 53.025

— 44.593

— 36.121

— 36.016

— 26.635

— 22.643

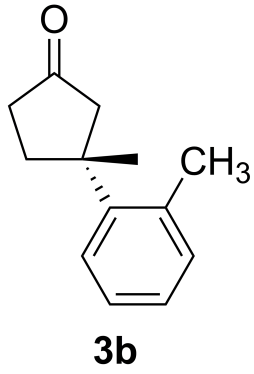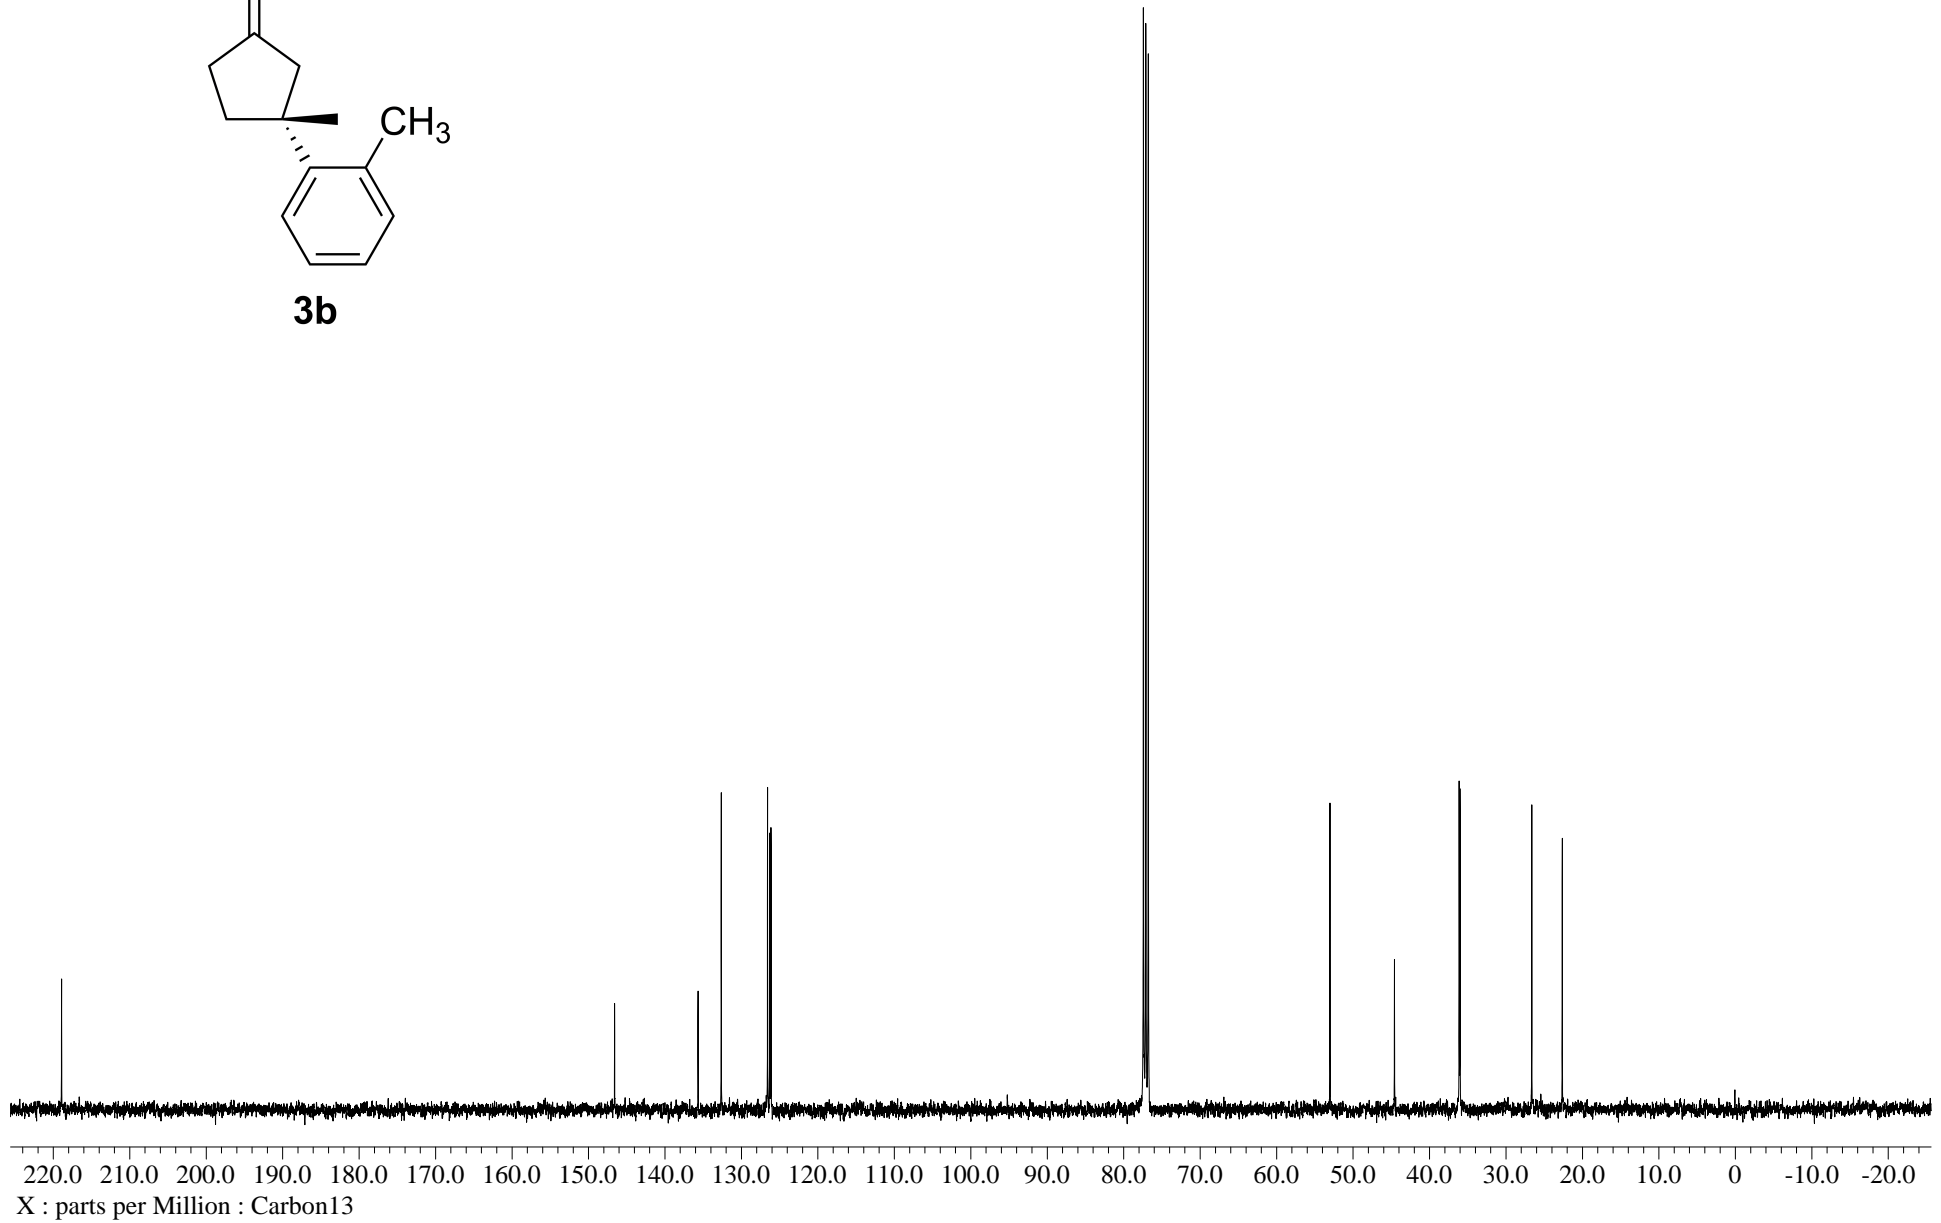

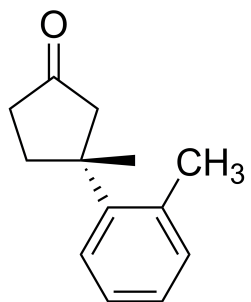

**3b**

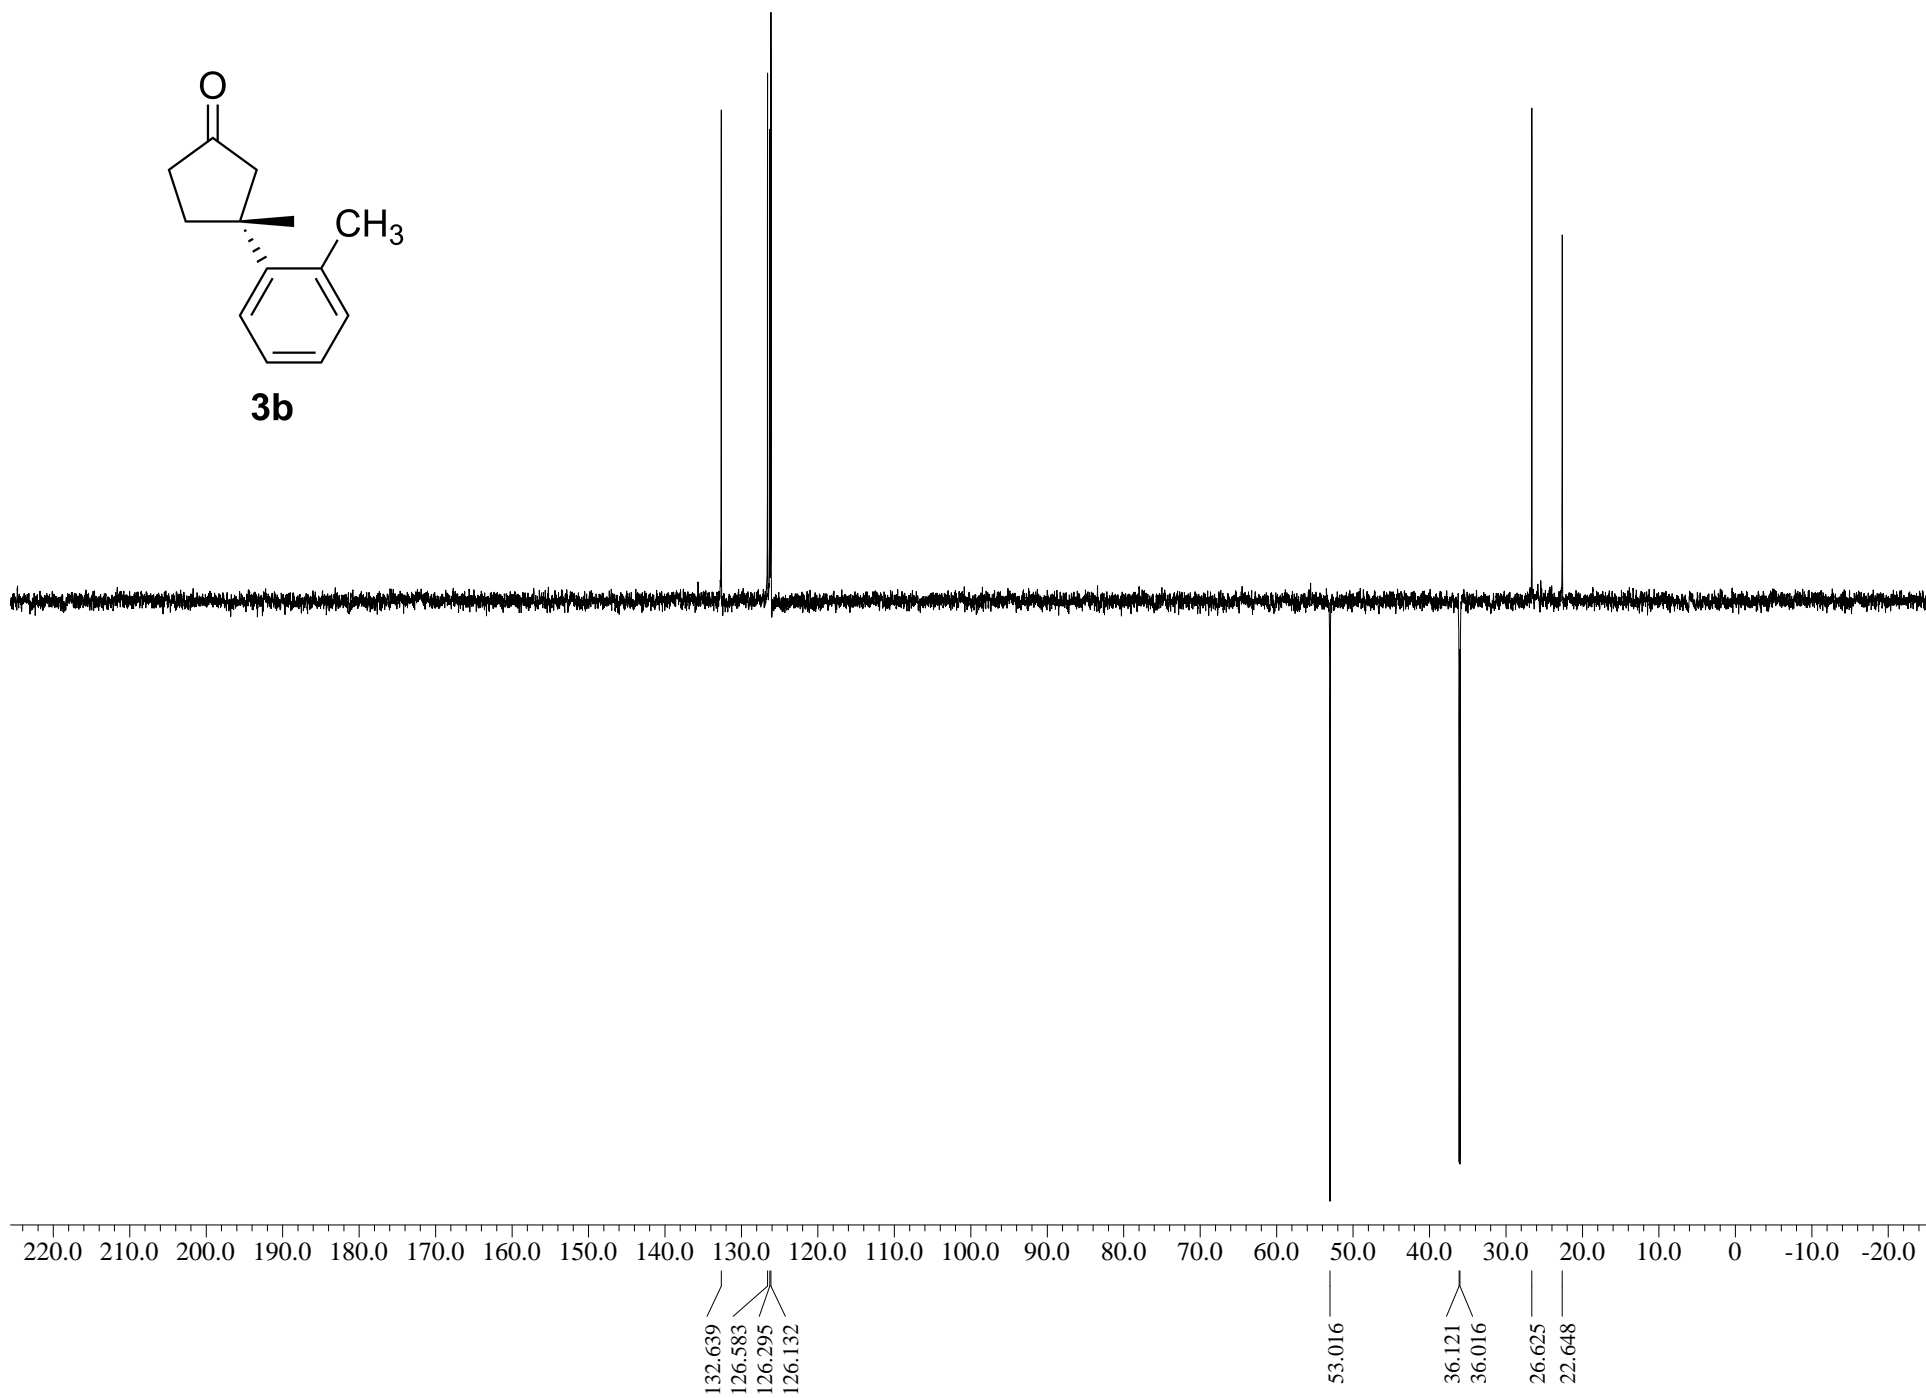

X : parts per Million : Carbon13

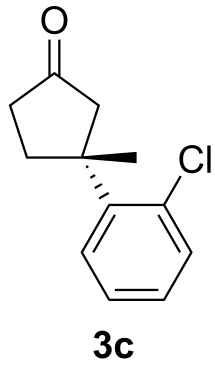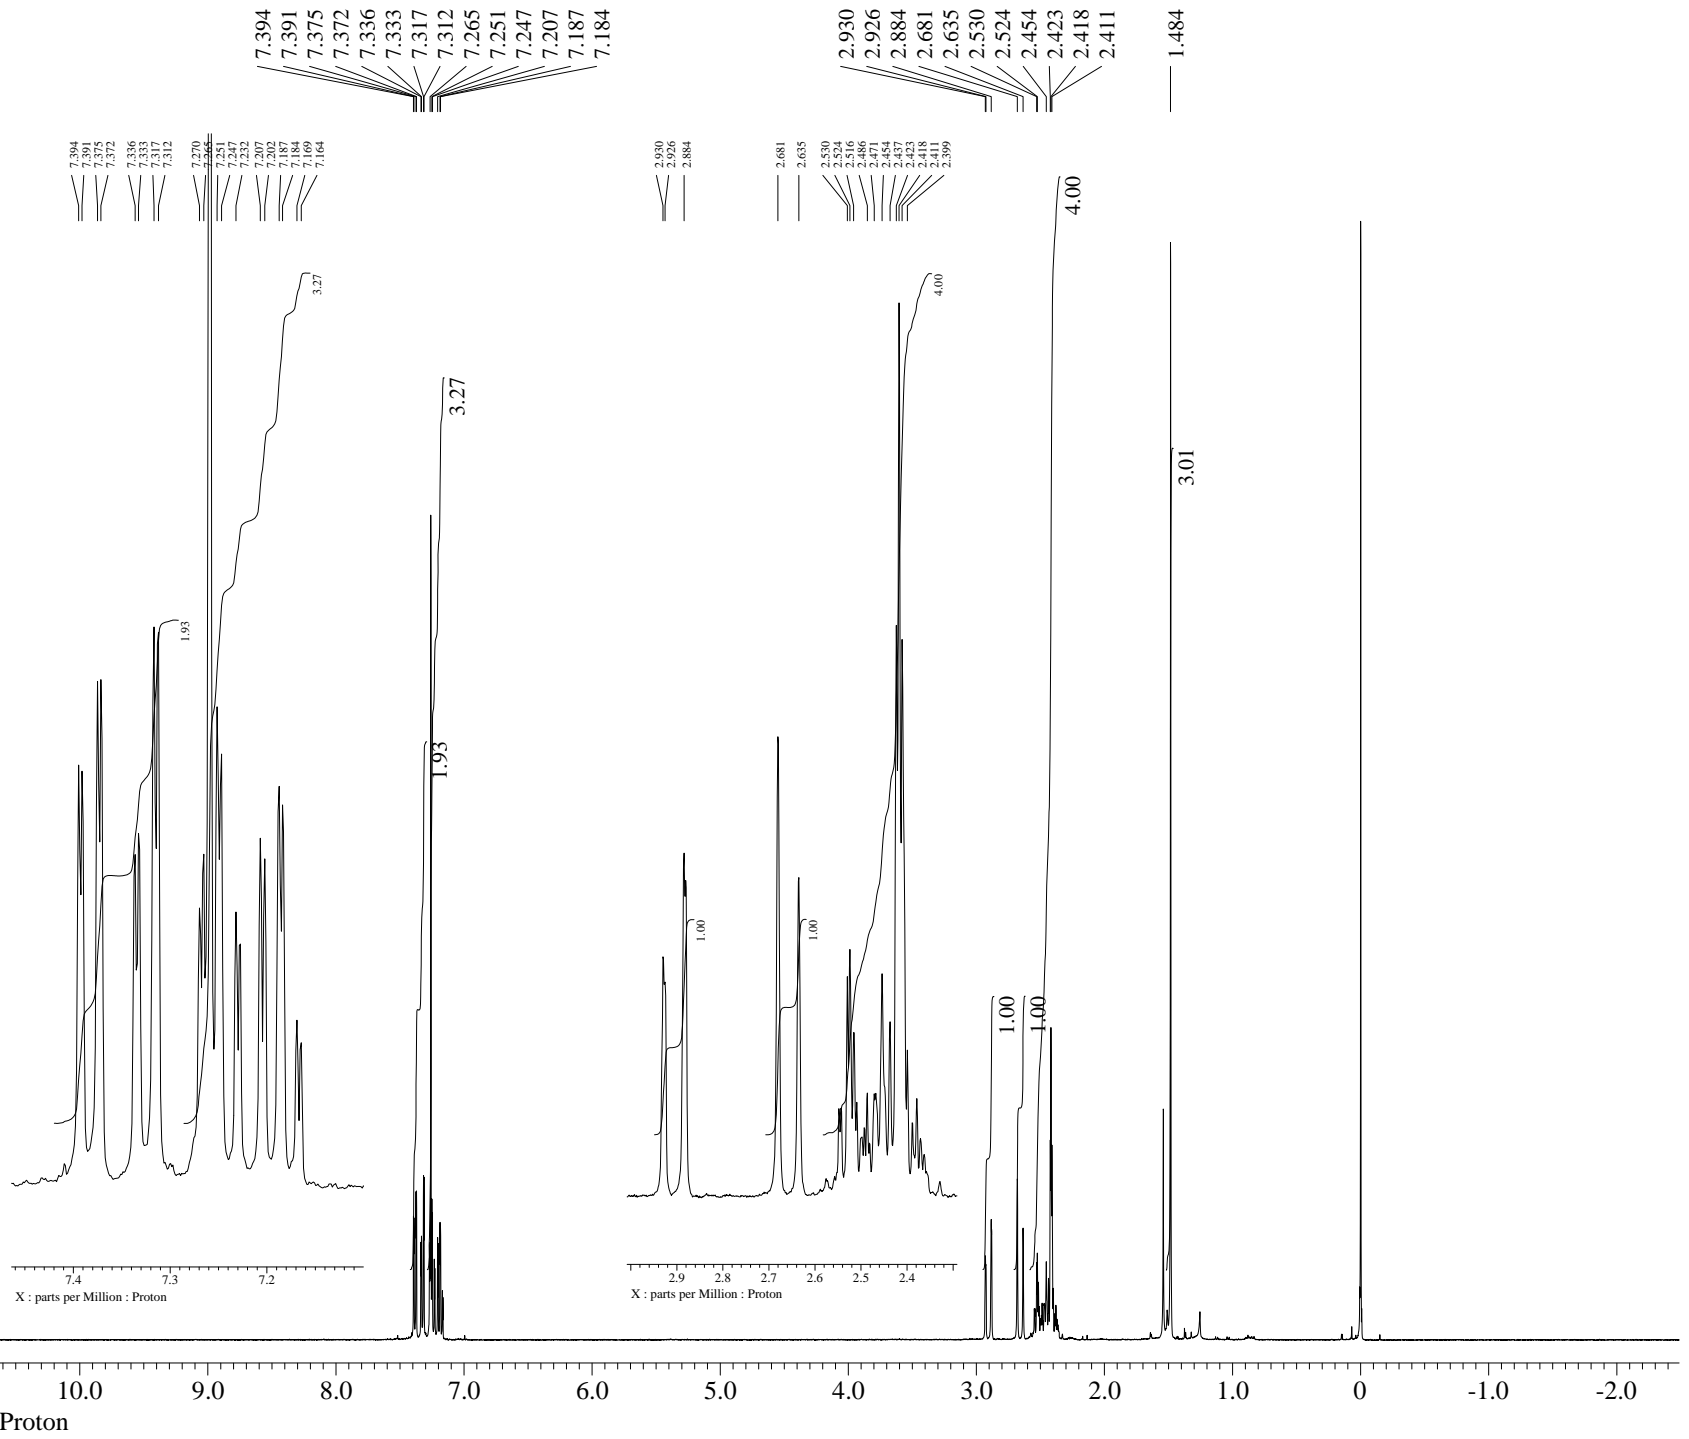



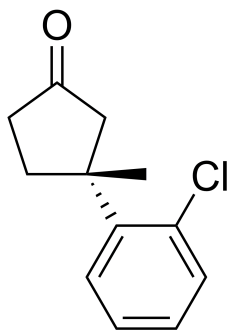

**3c**

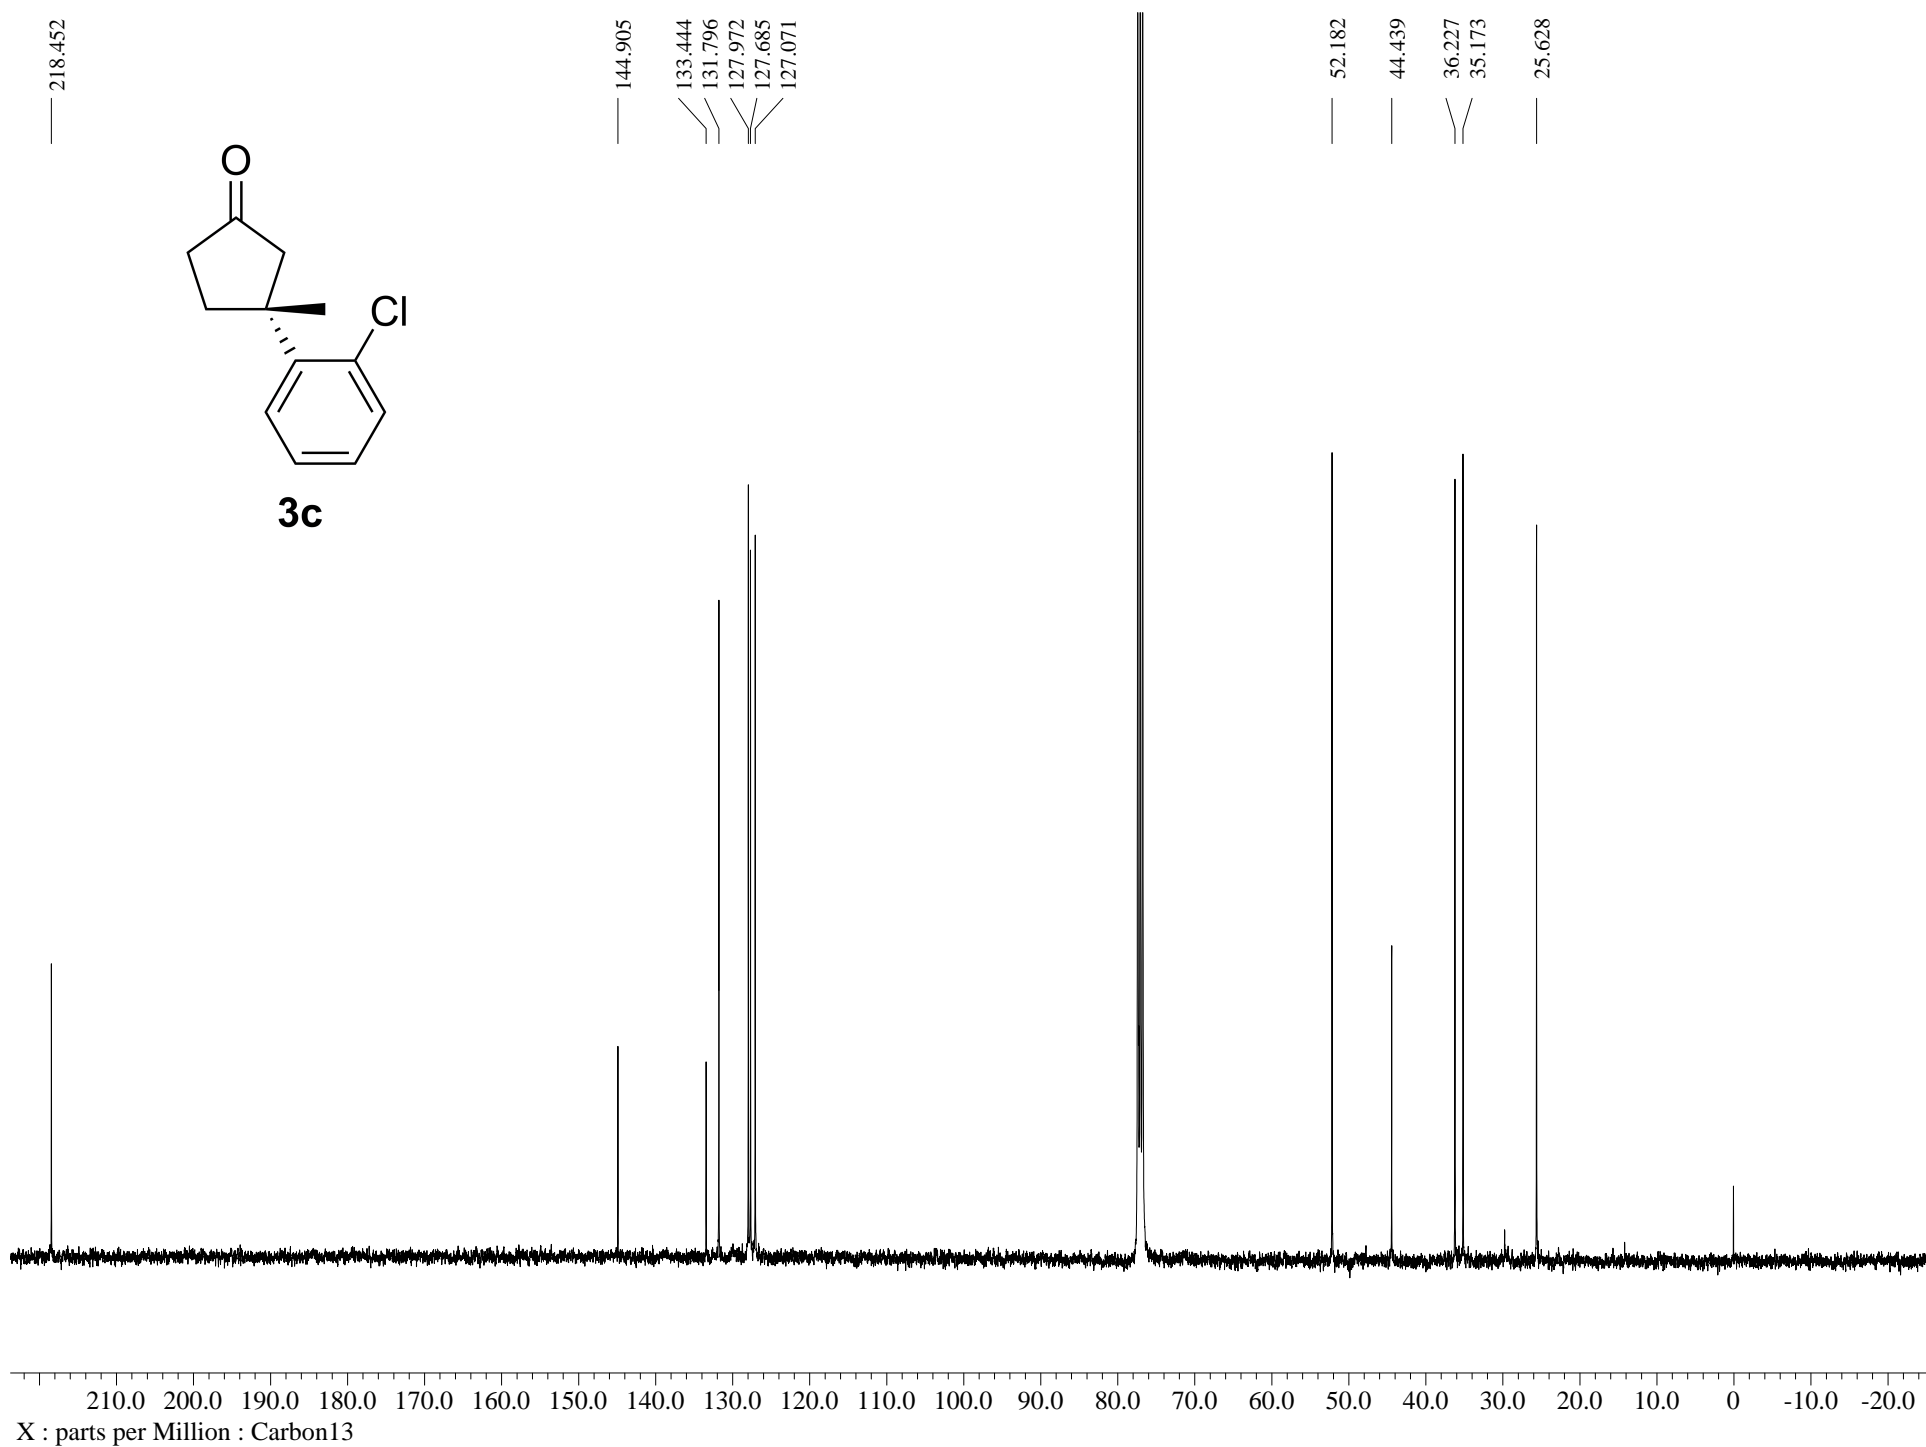

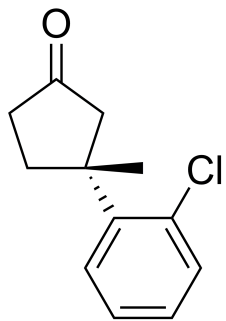

**3c**

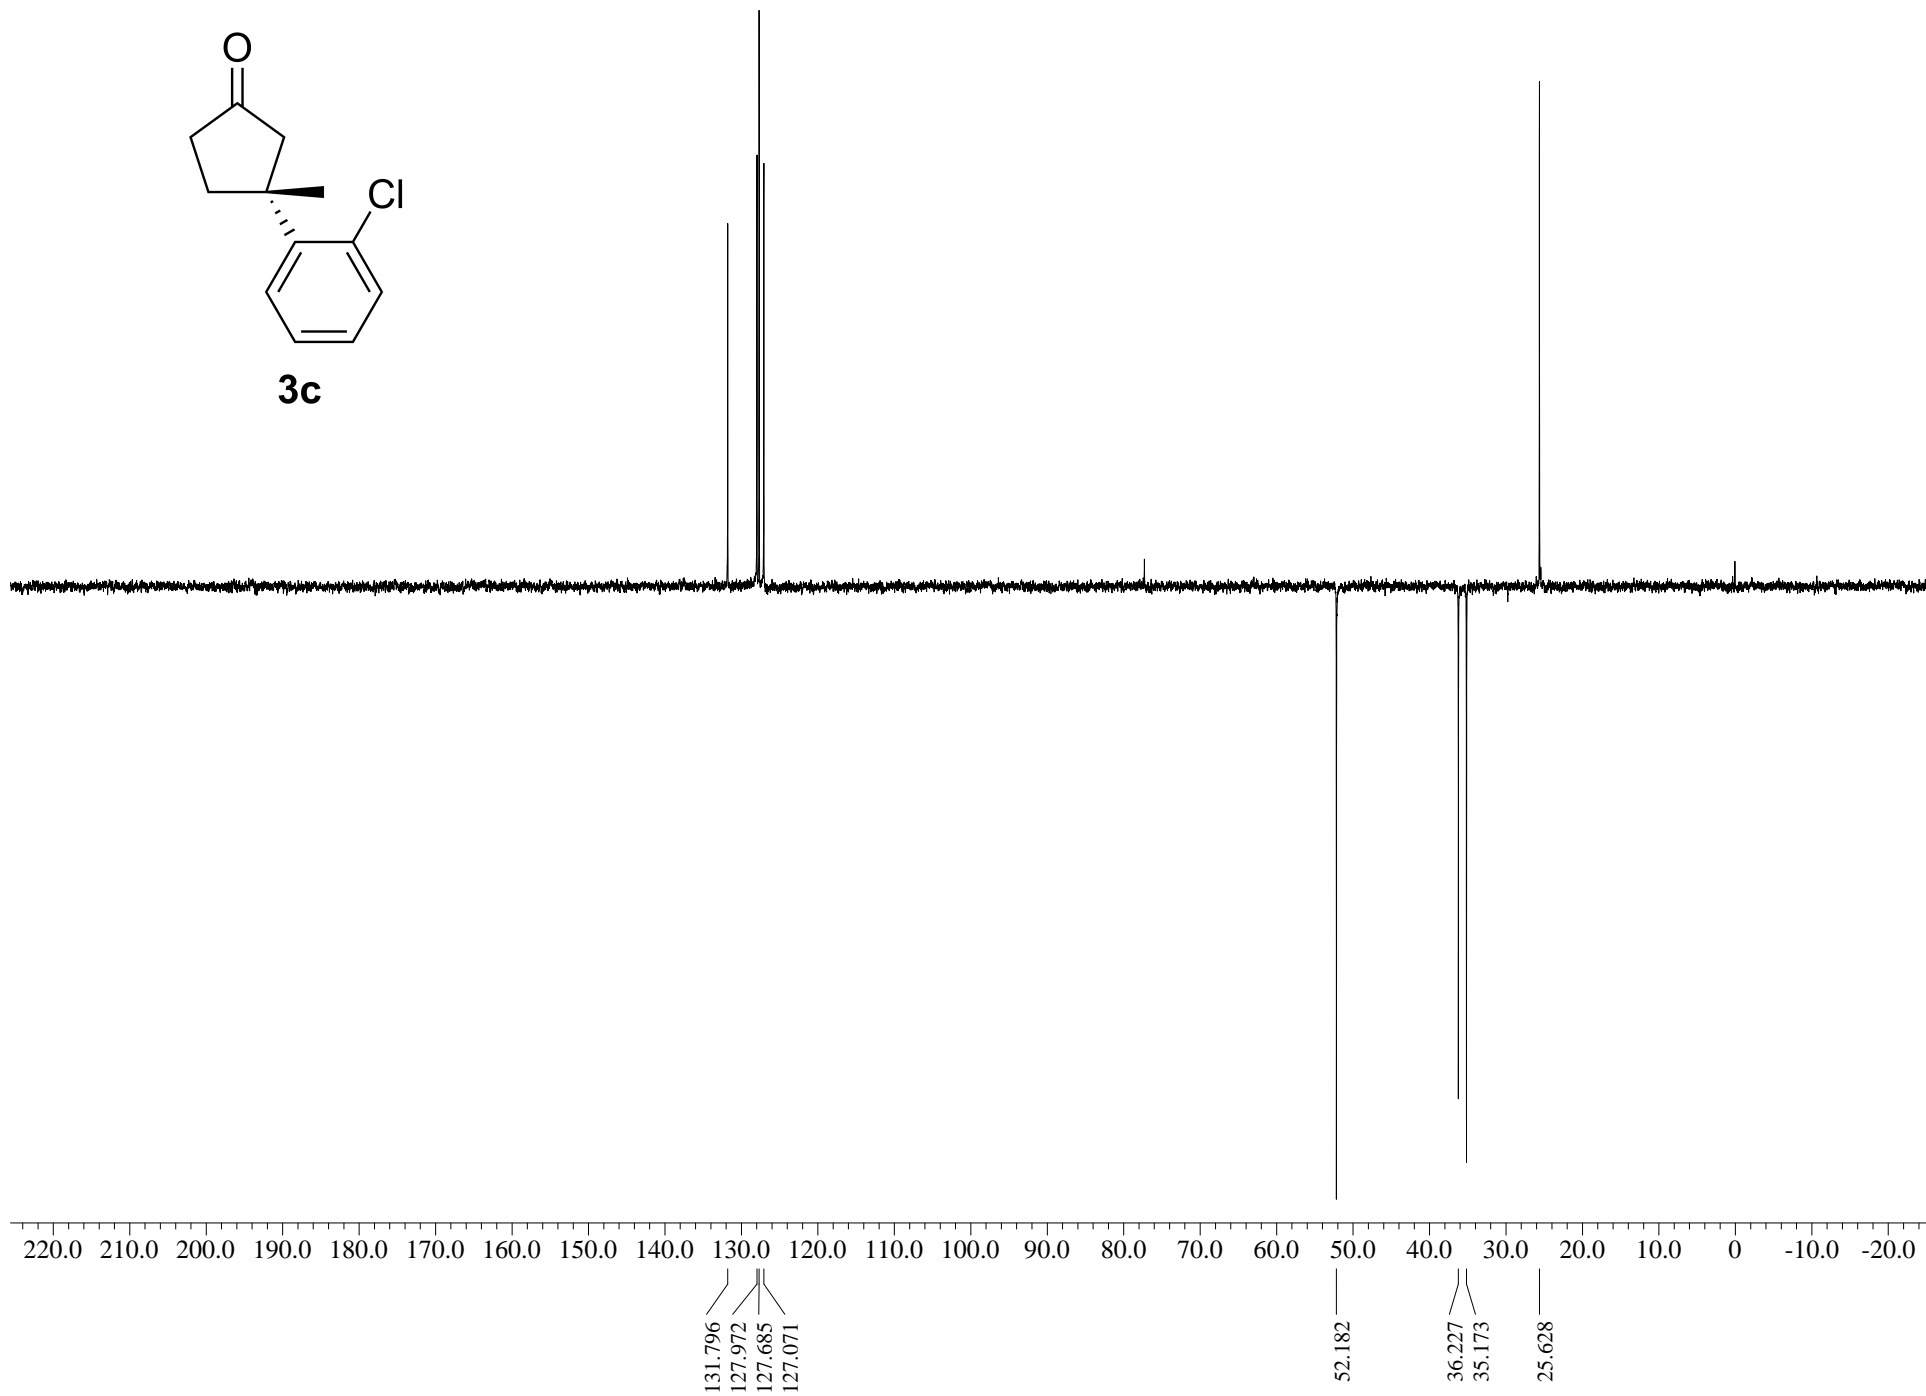

X : parts per Million : Carbon13

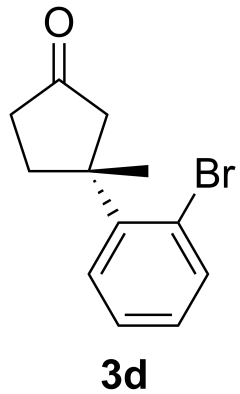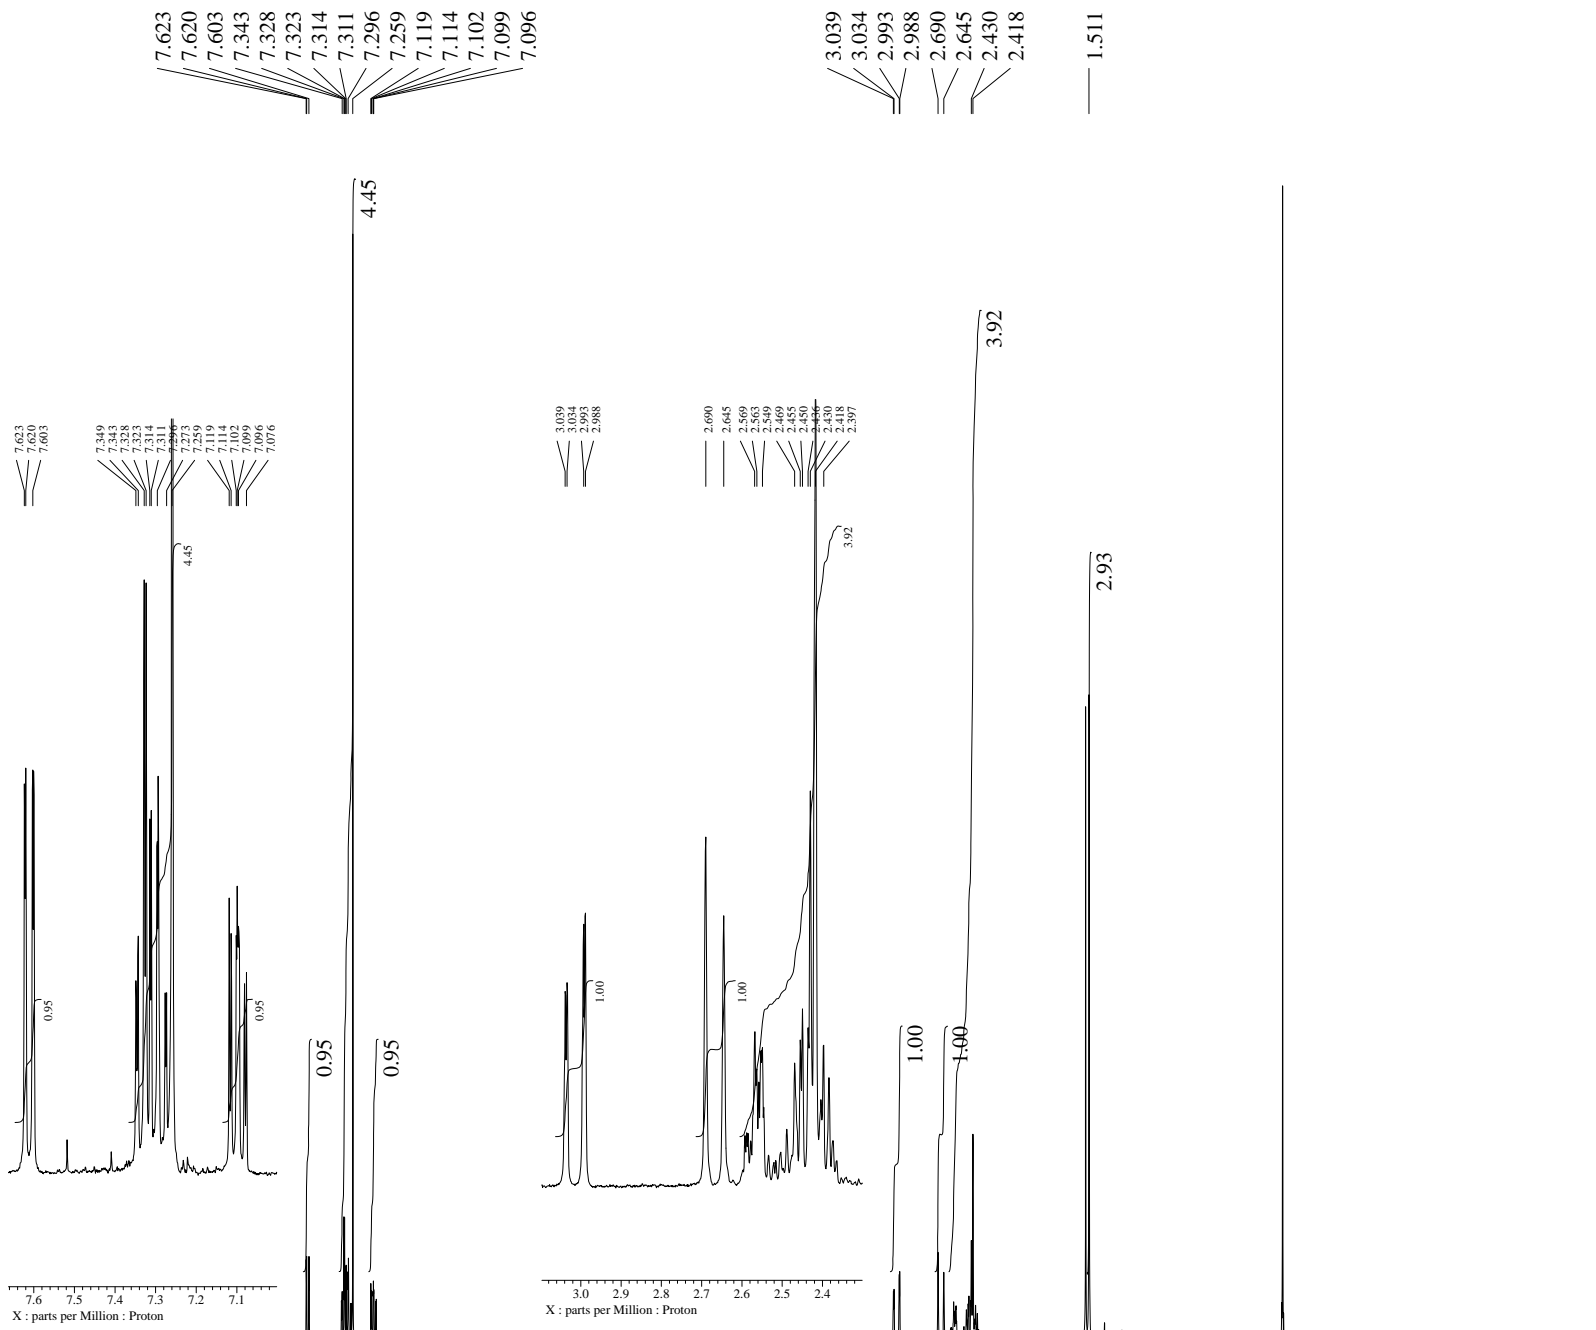

X : parts per Million : Proton

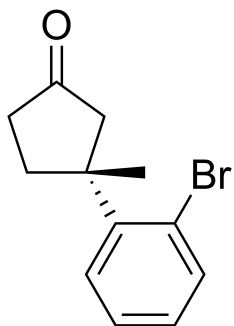

**3d**

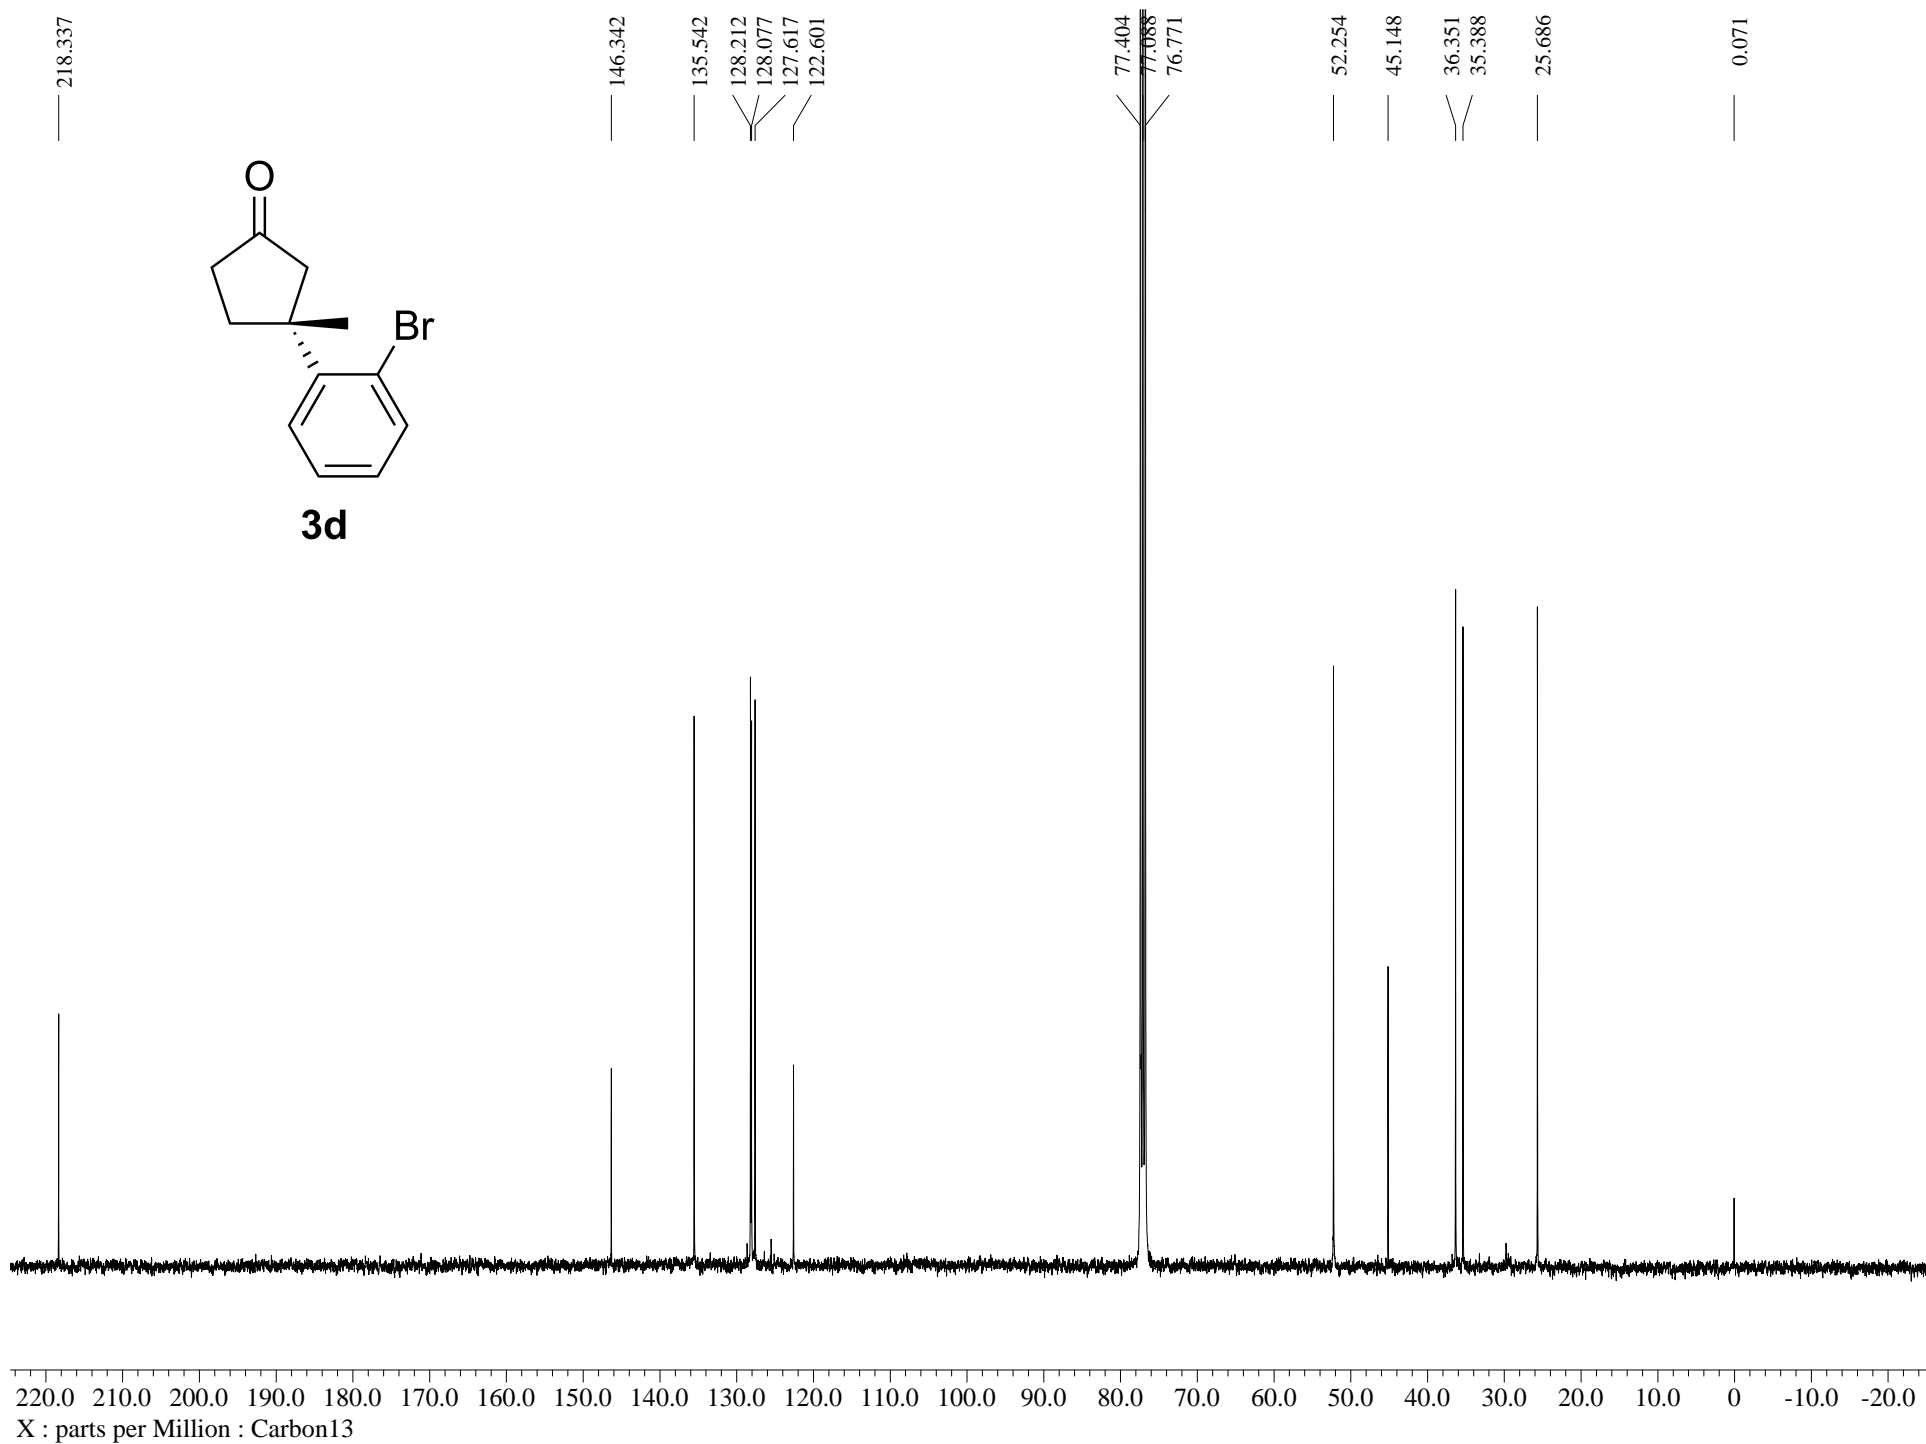

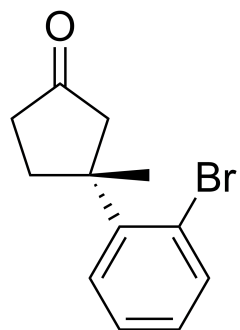

3d

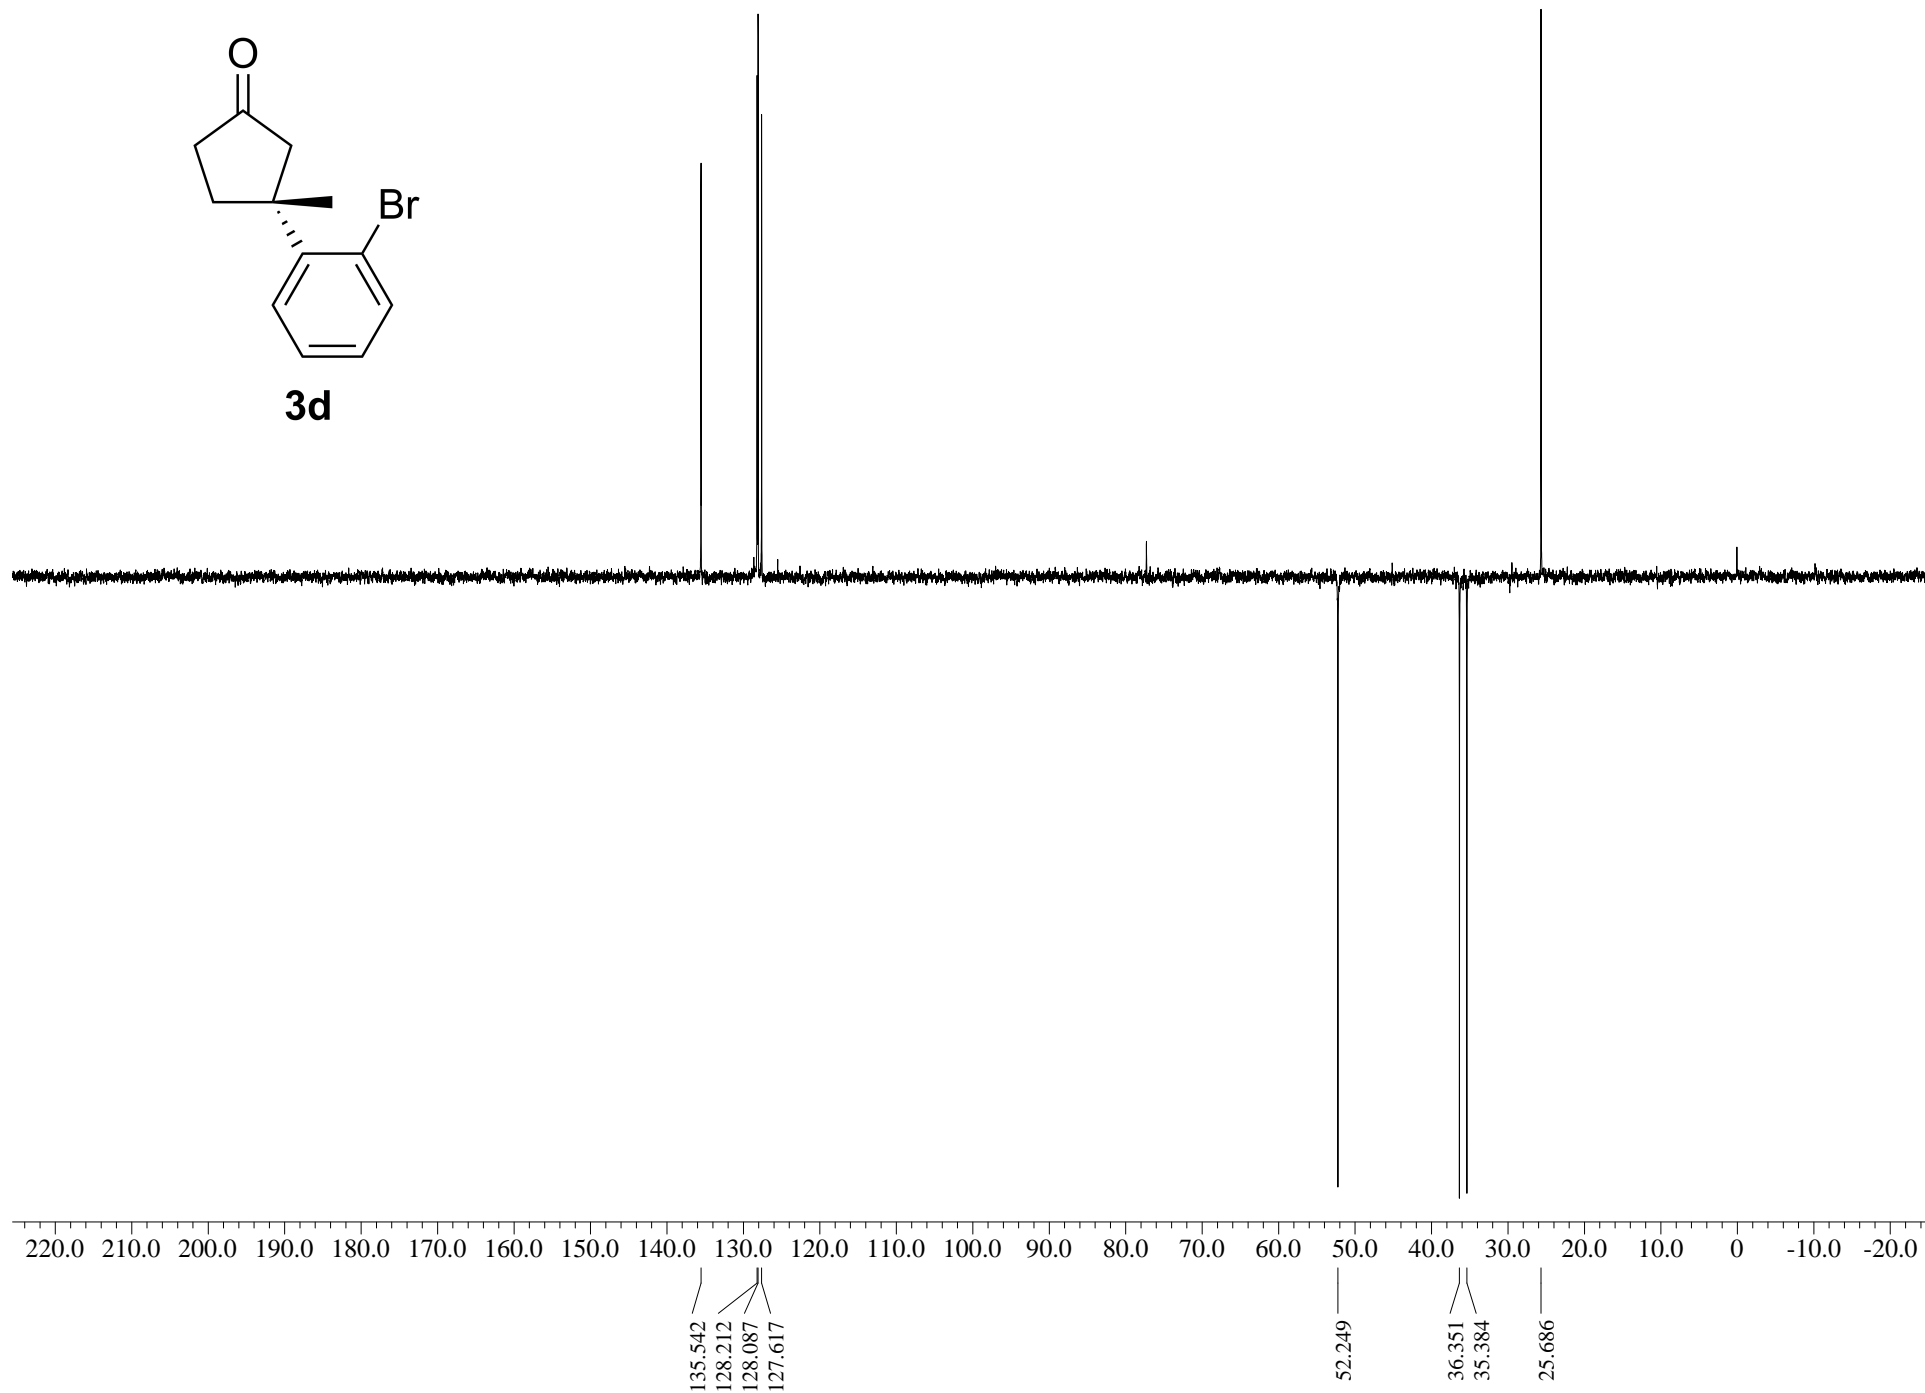

X : parts per Million : Carbon13

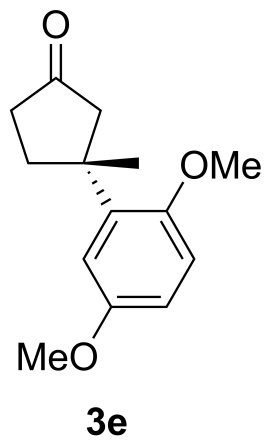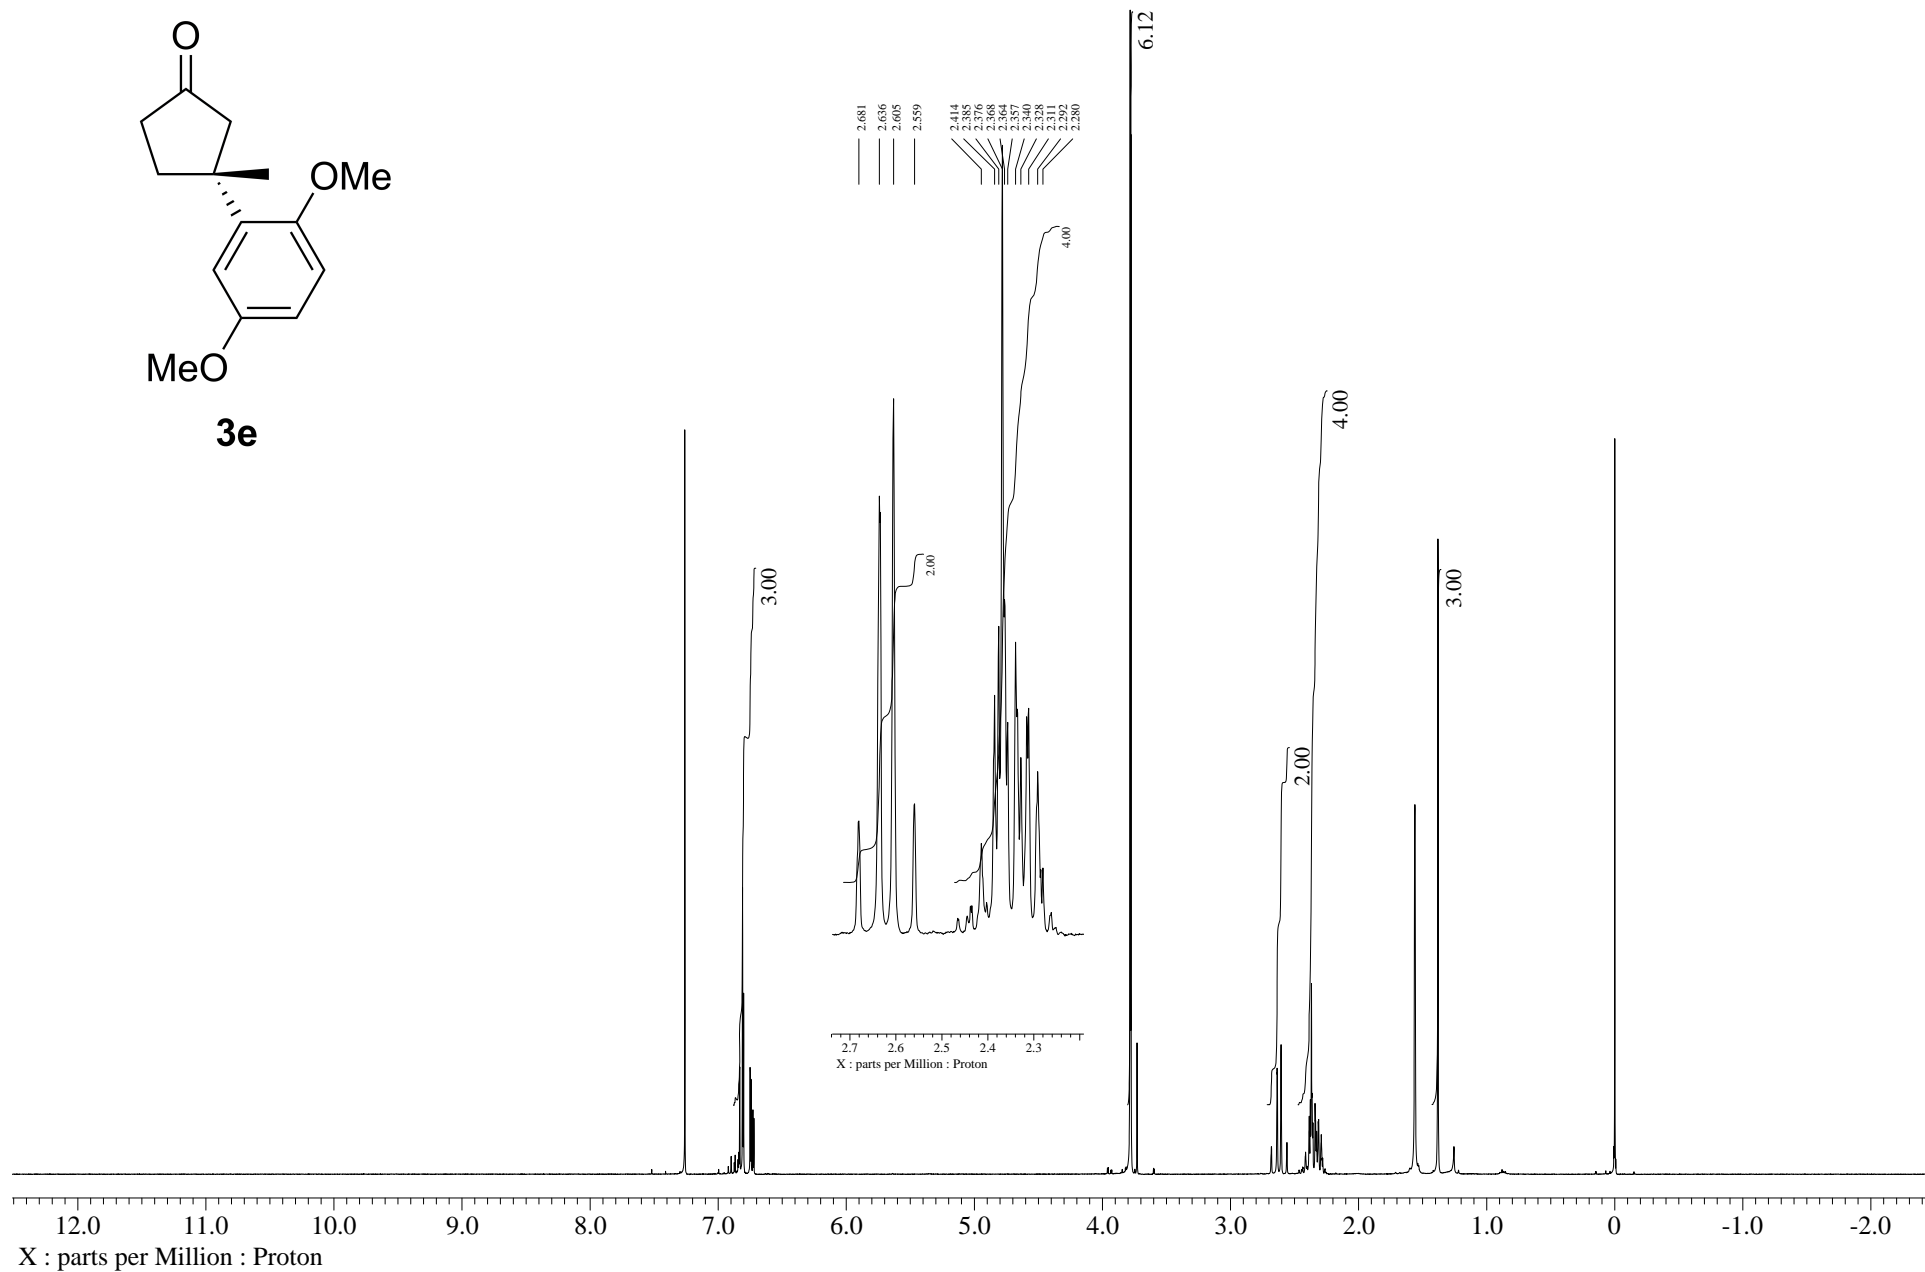

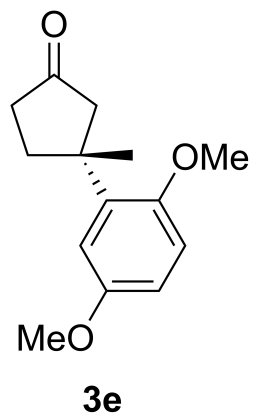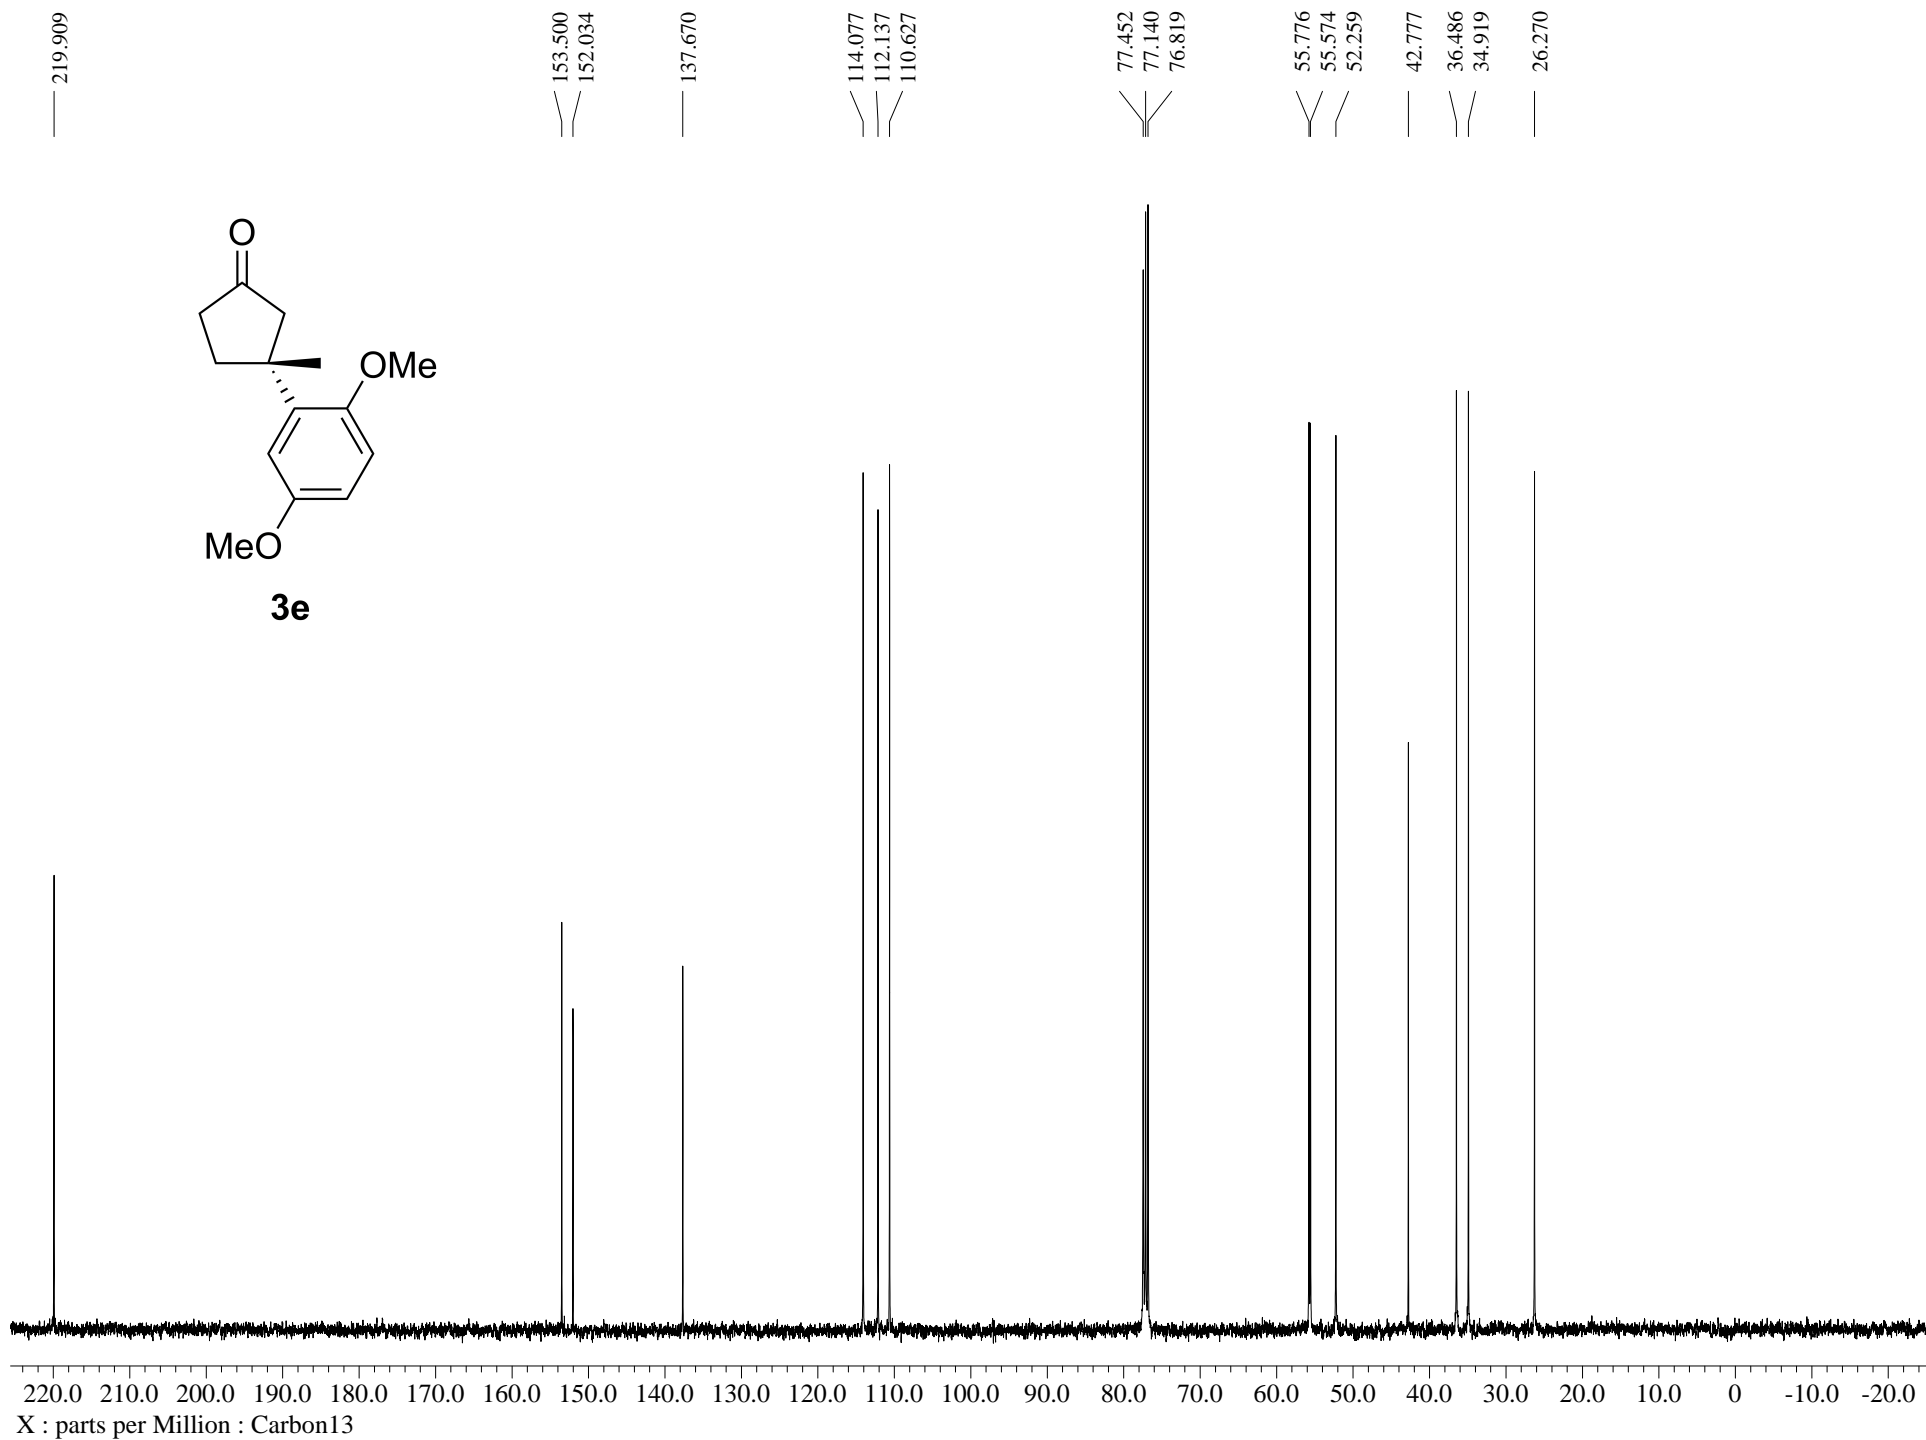

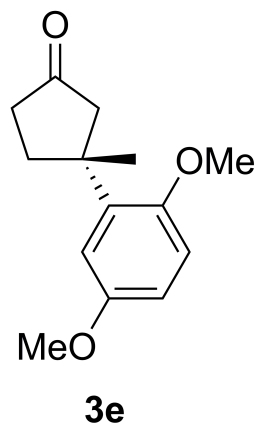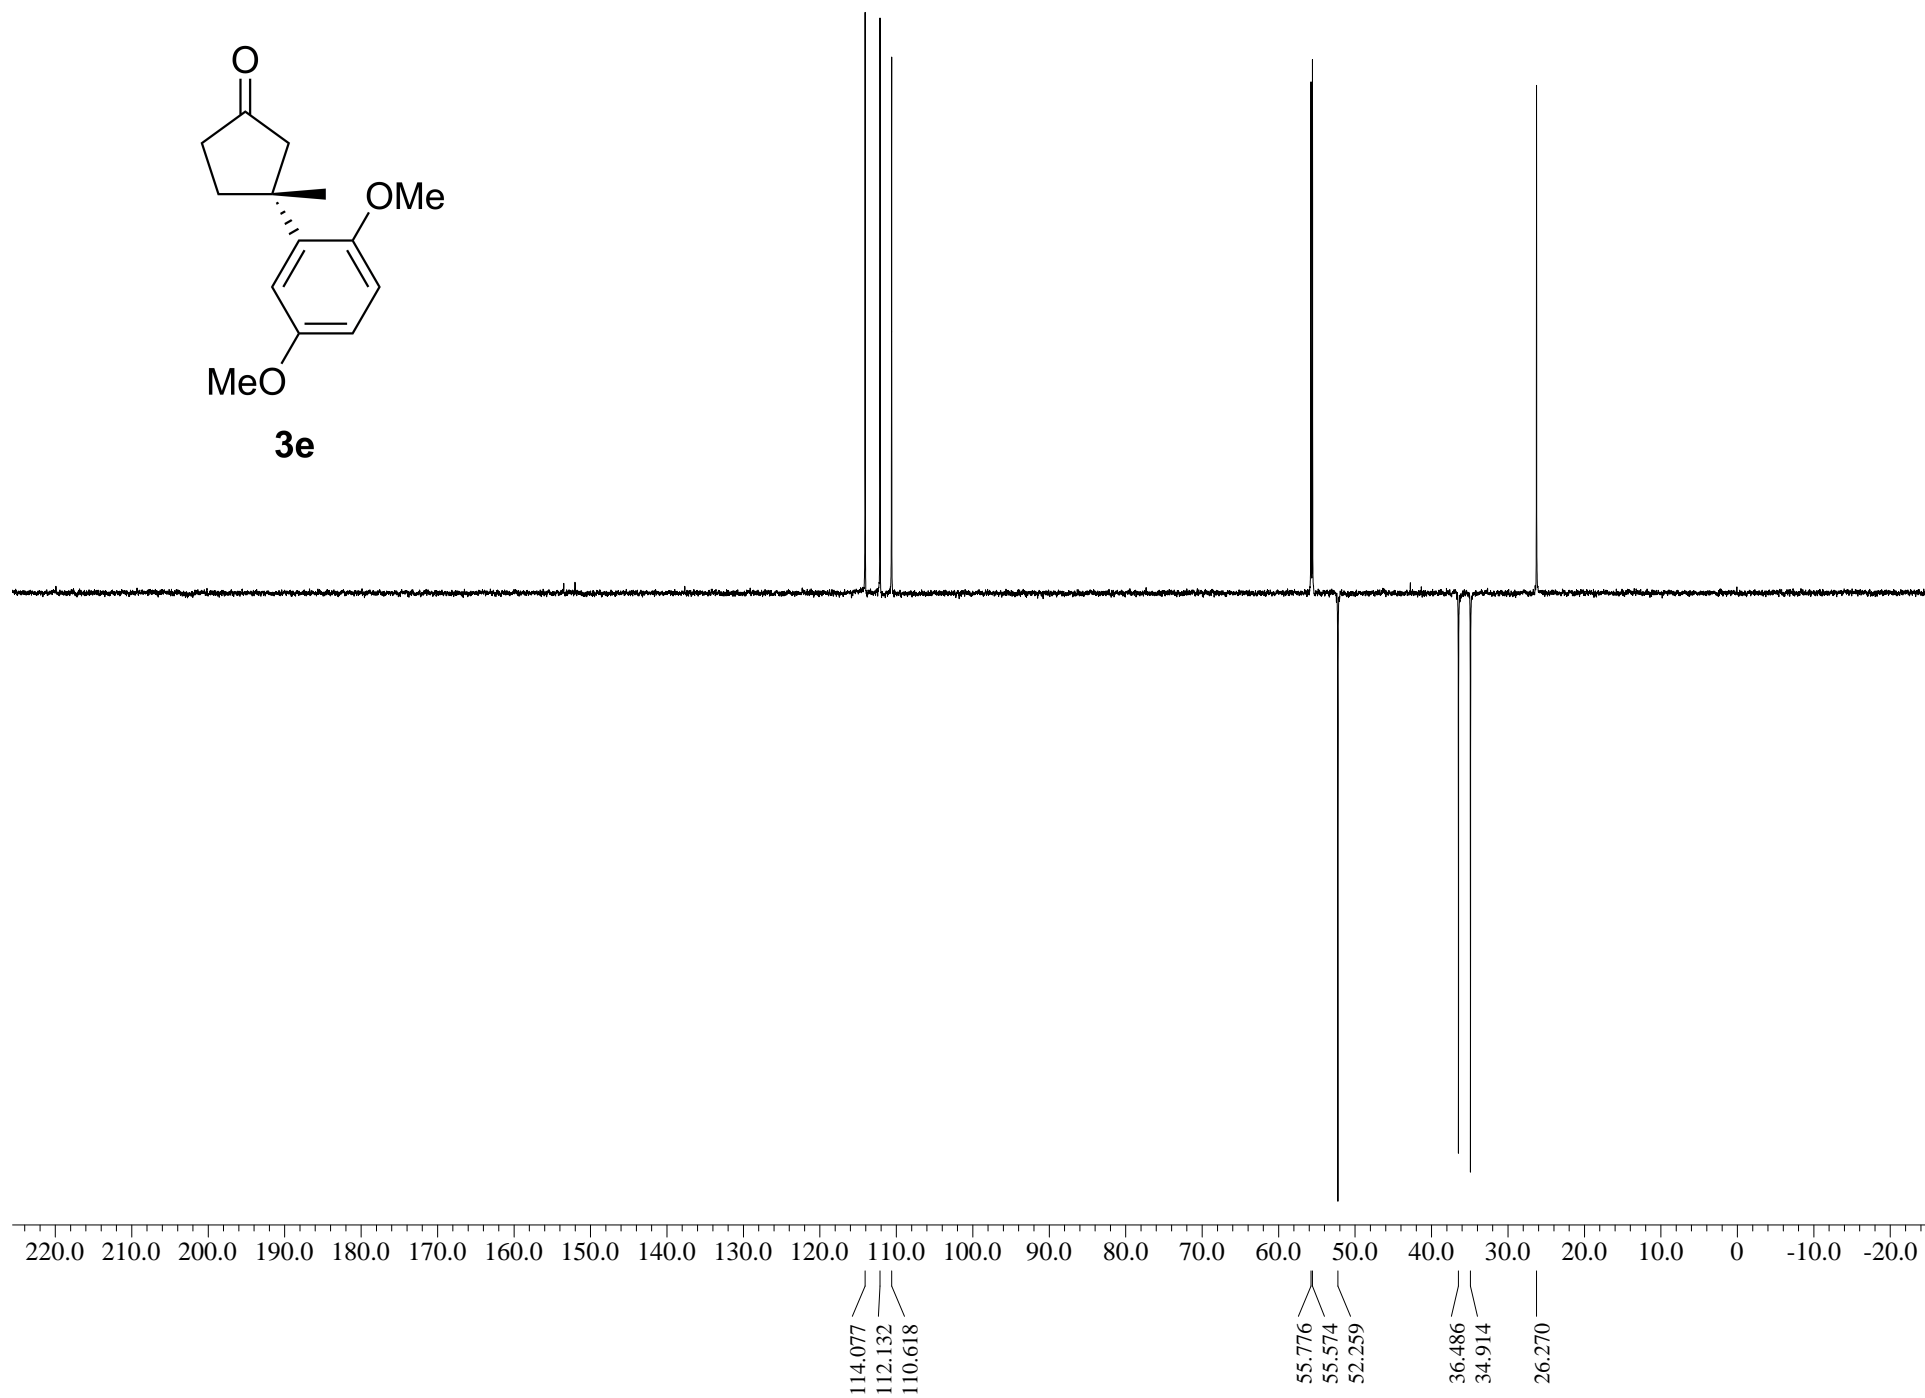



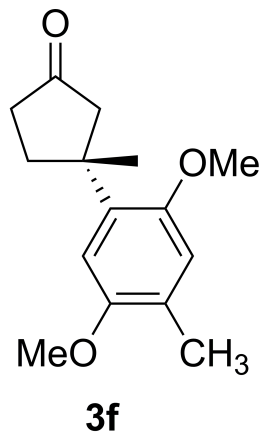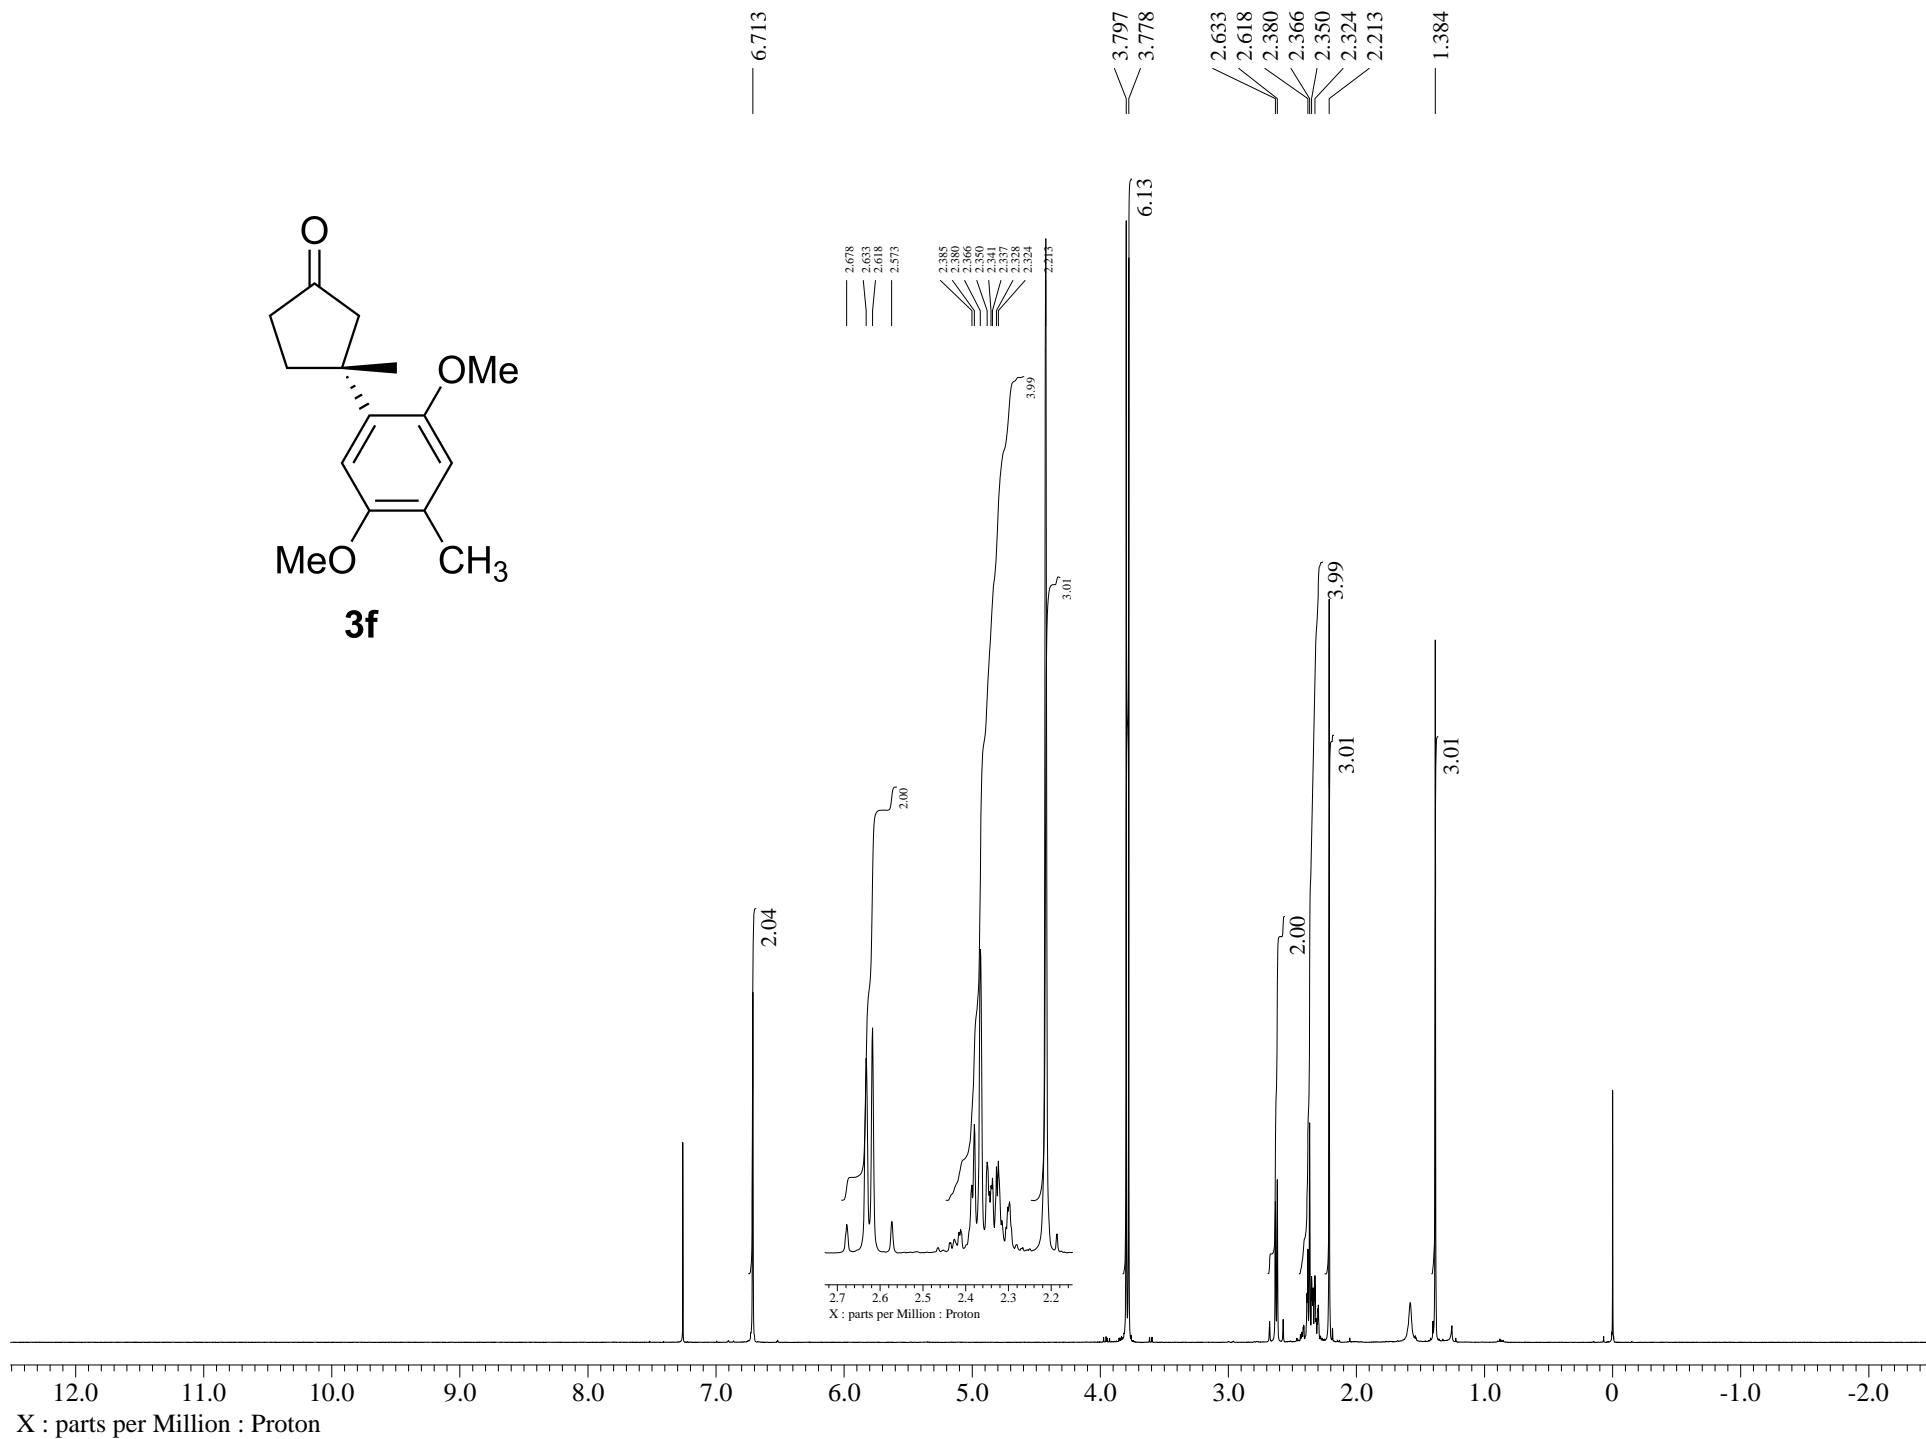

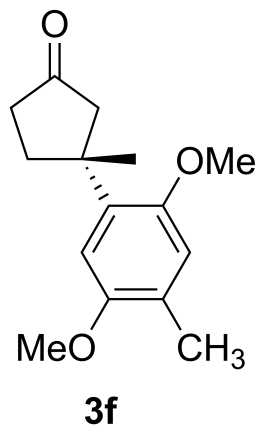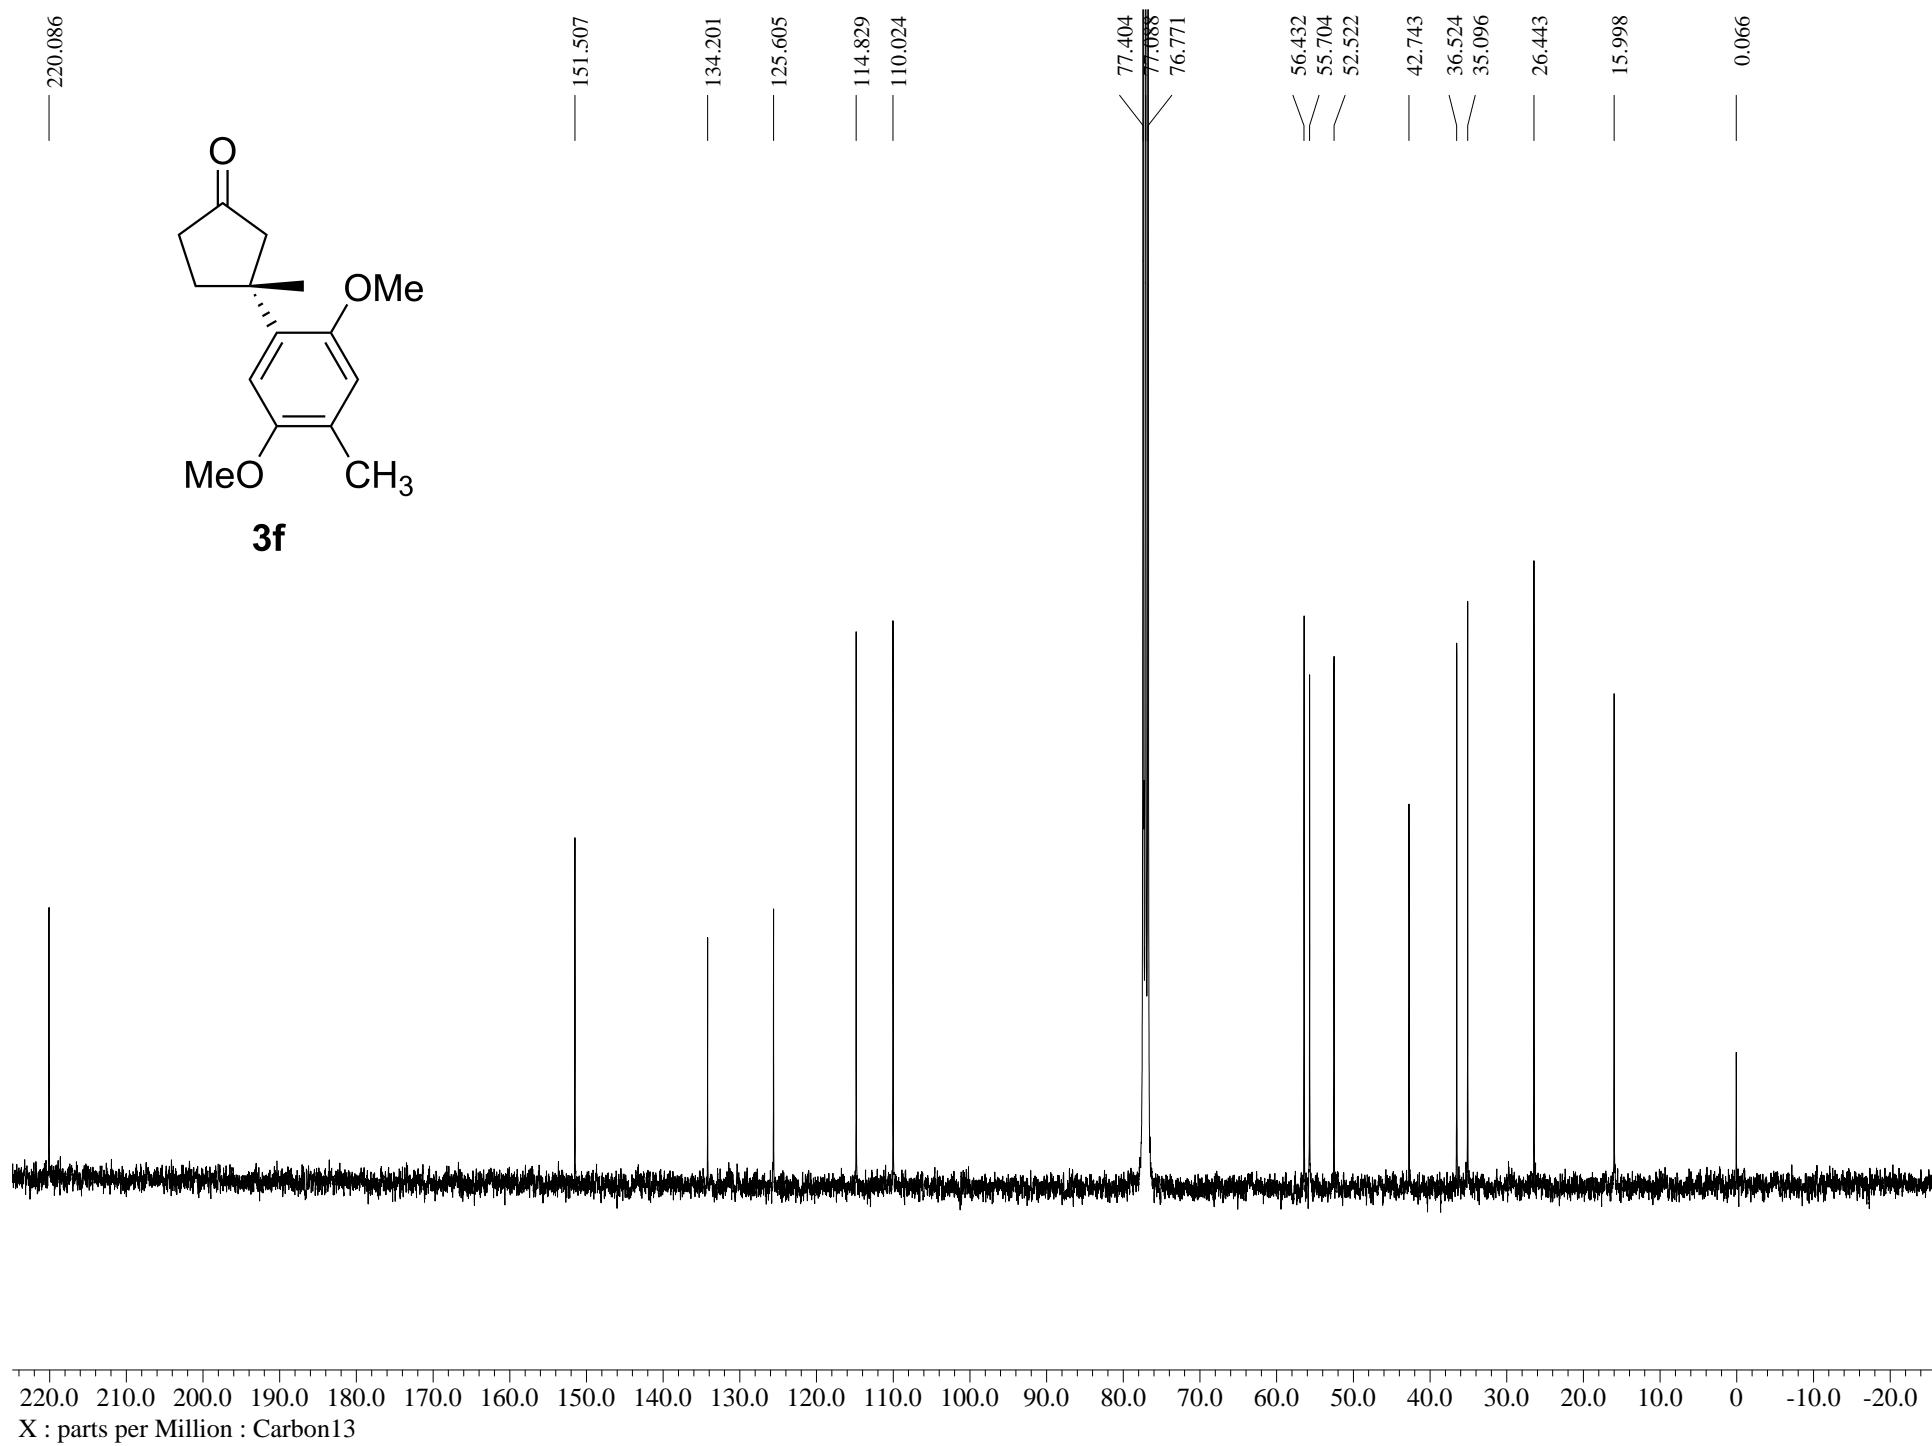

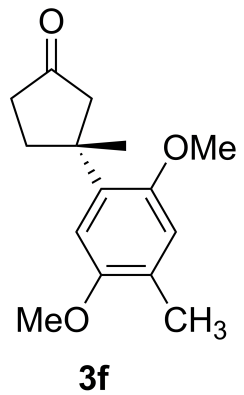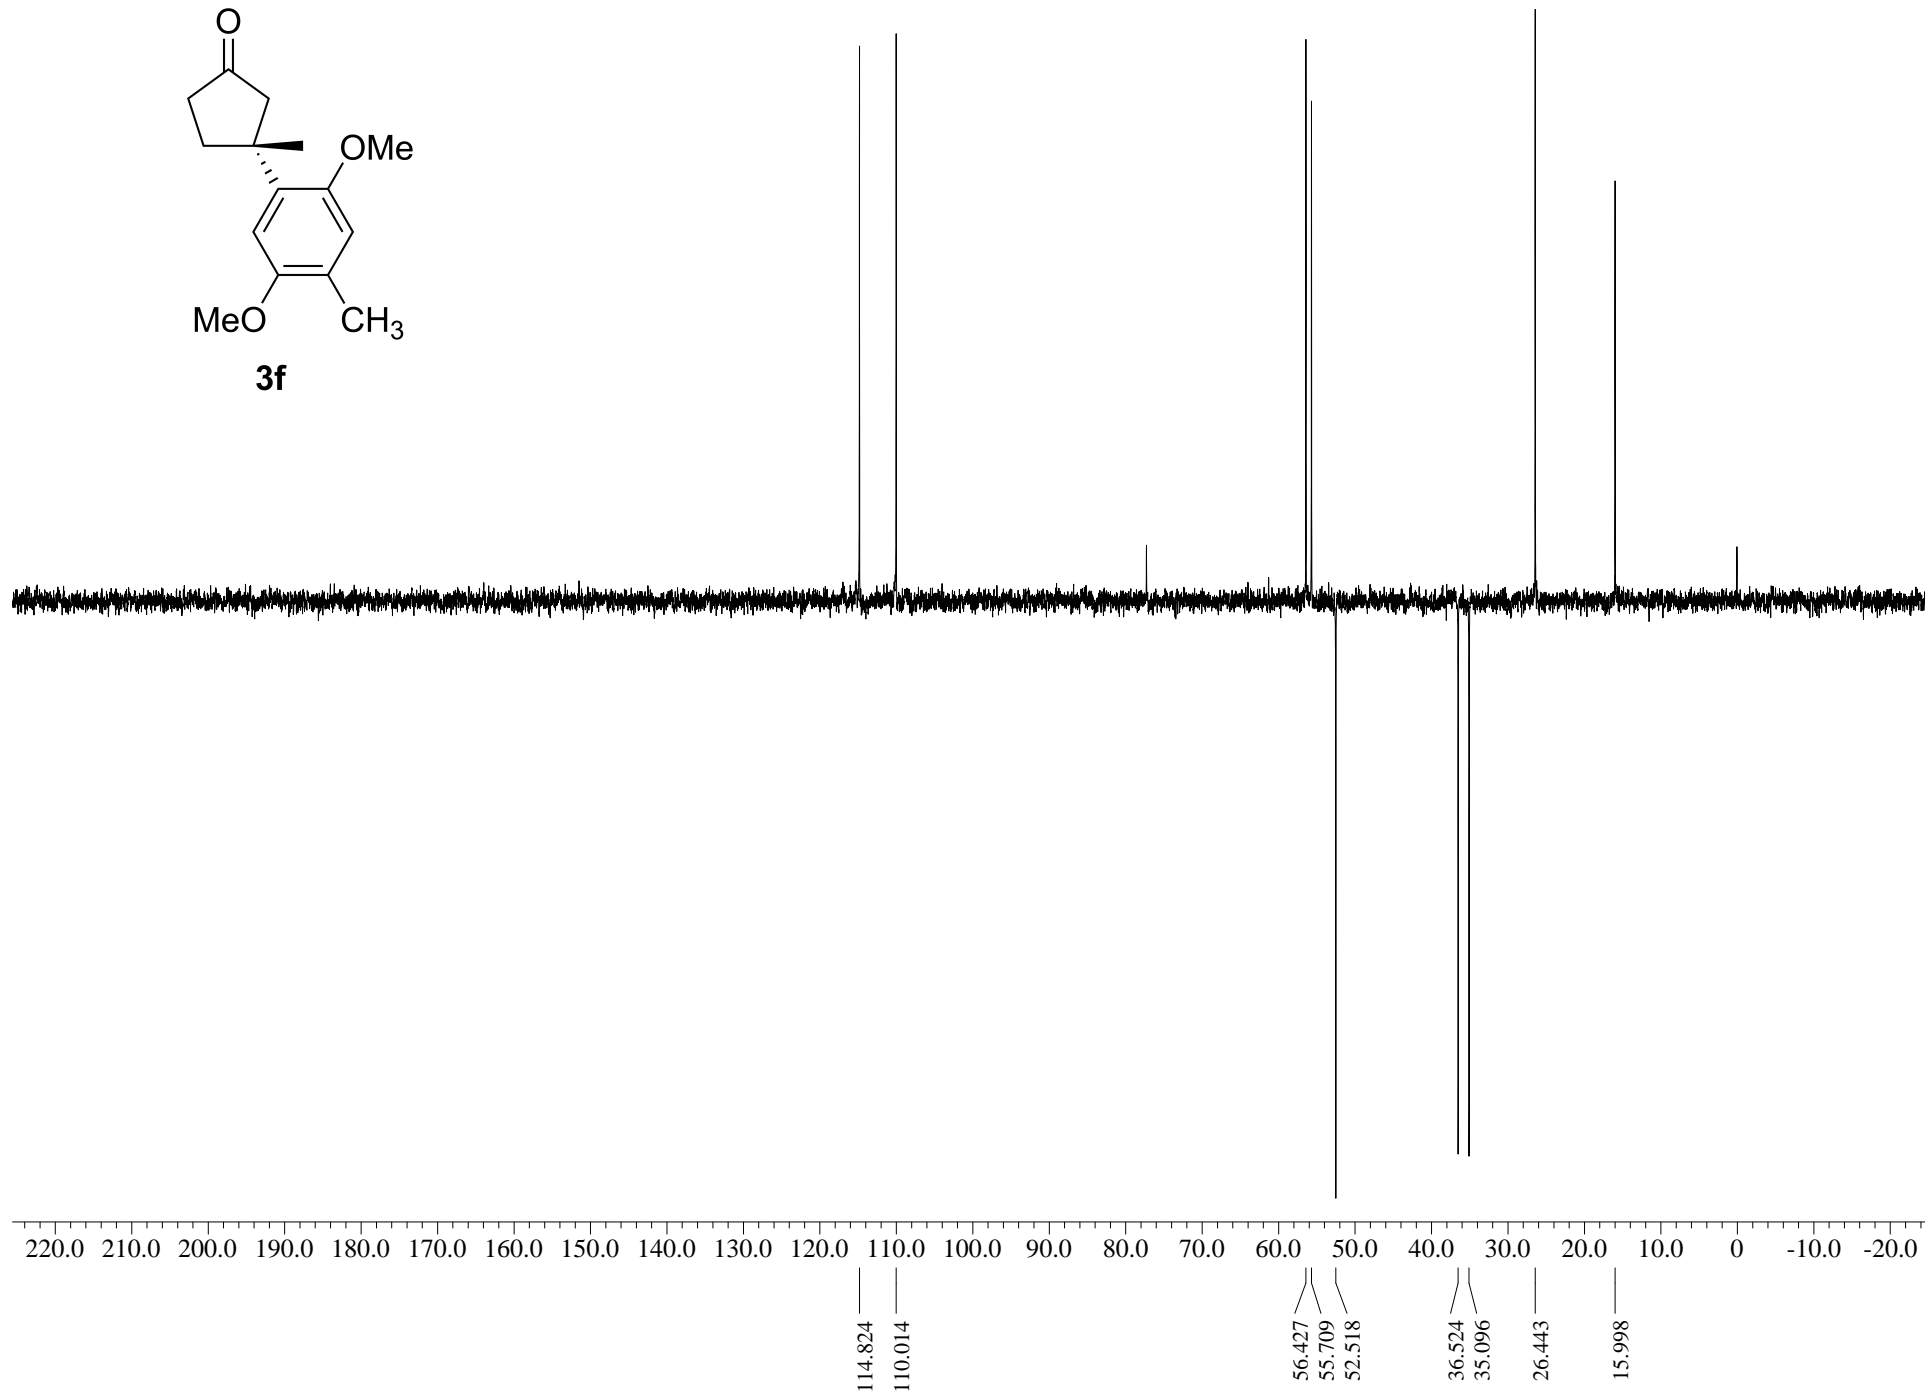

X : parts per Million : Carbon13

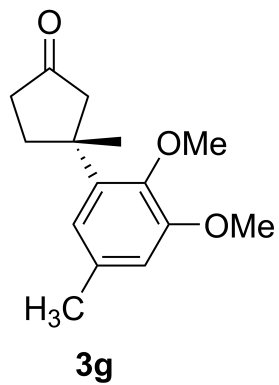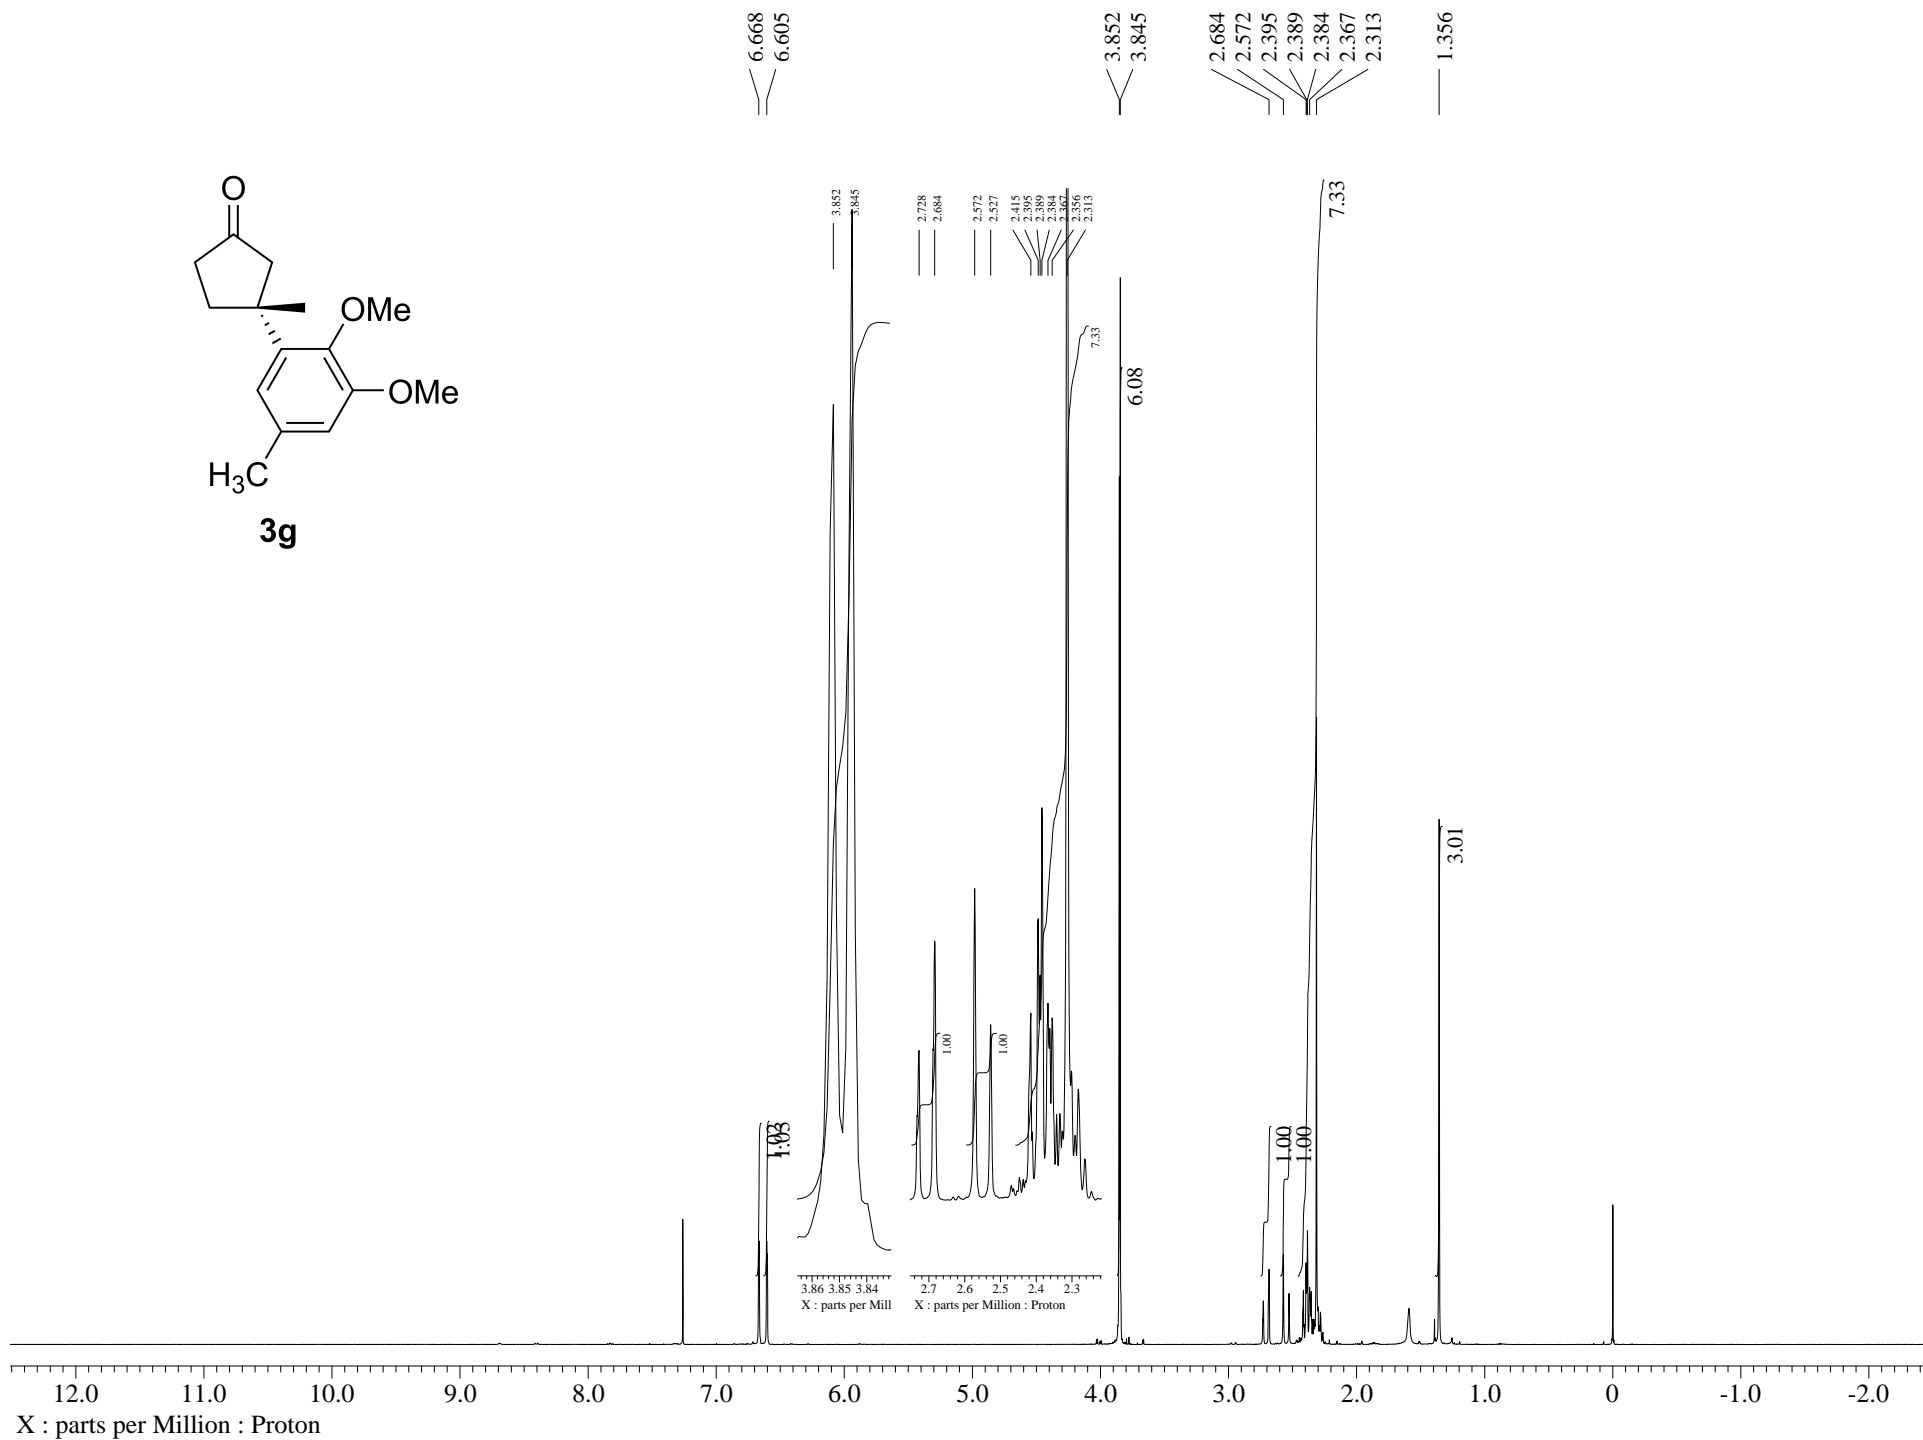

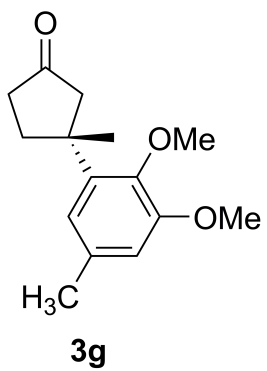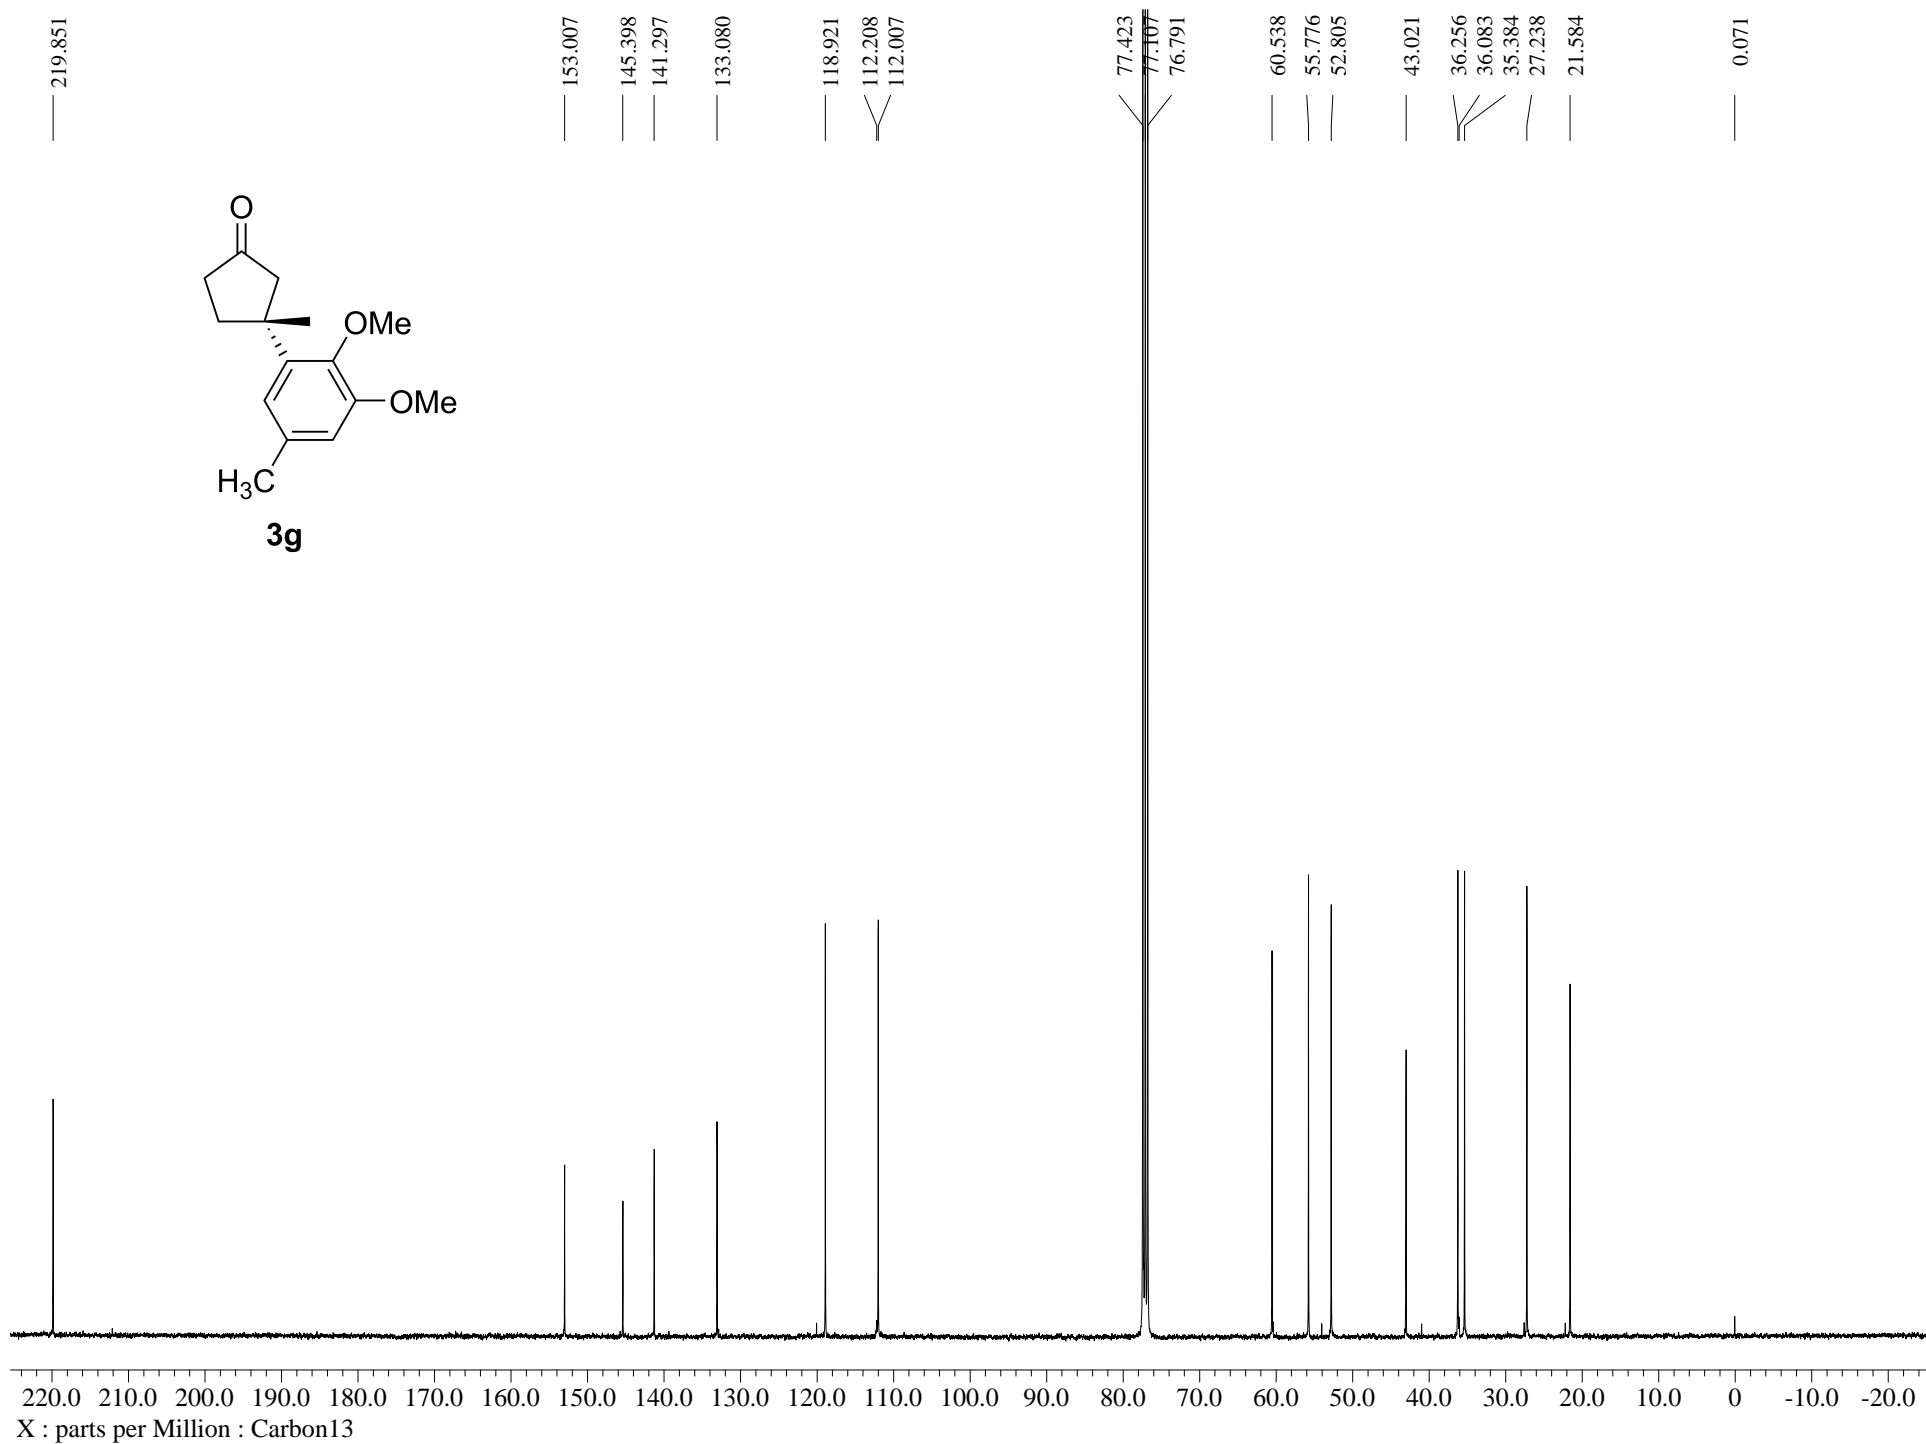

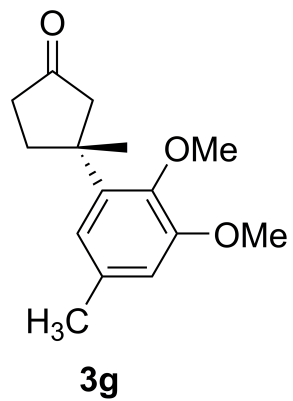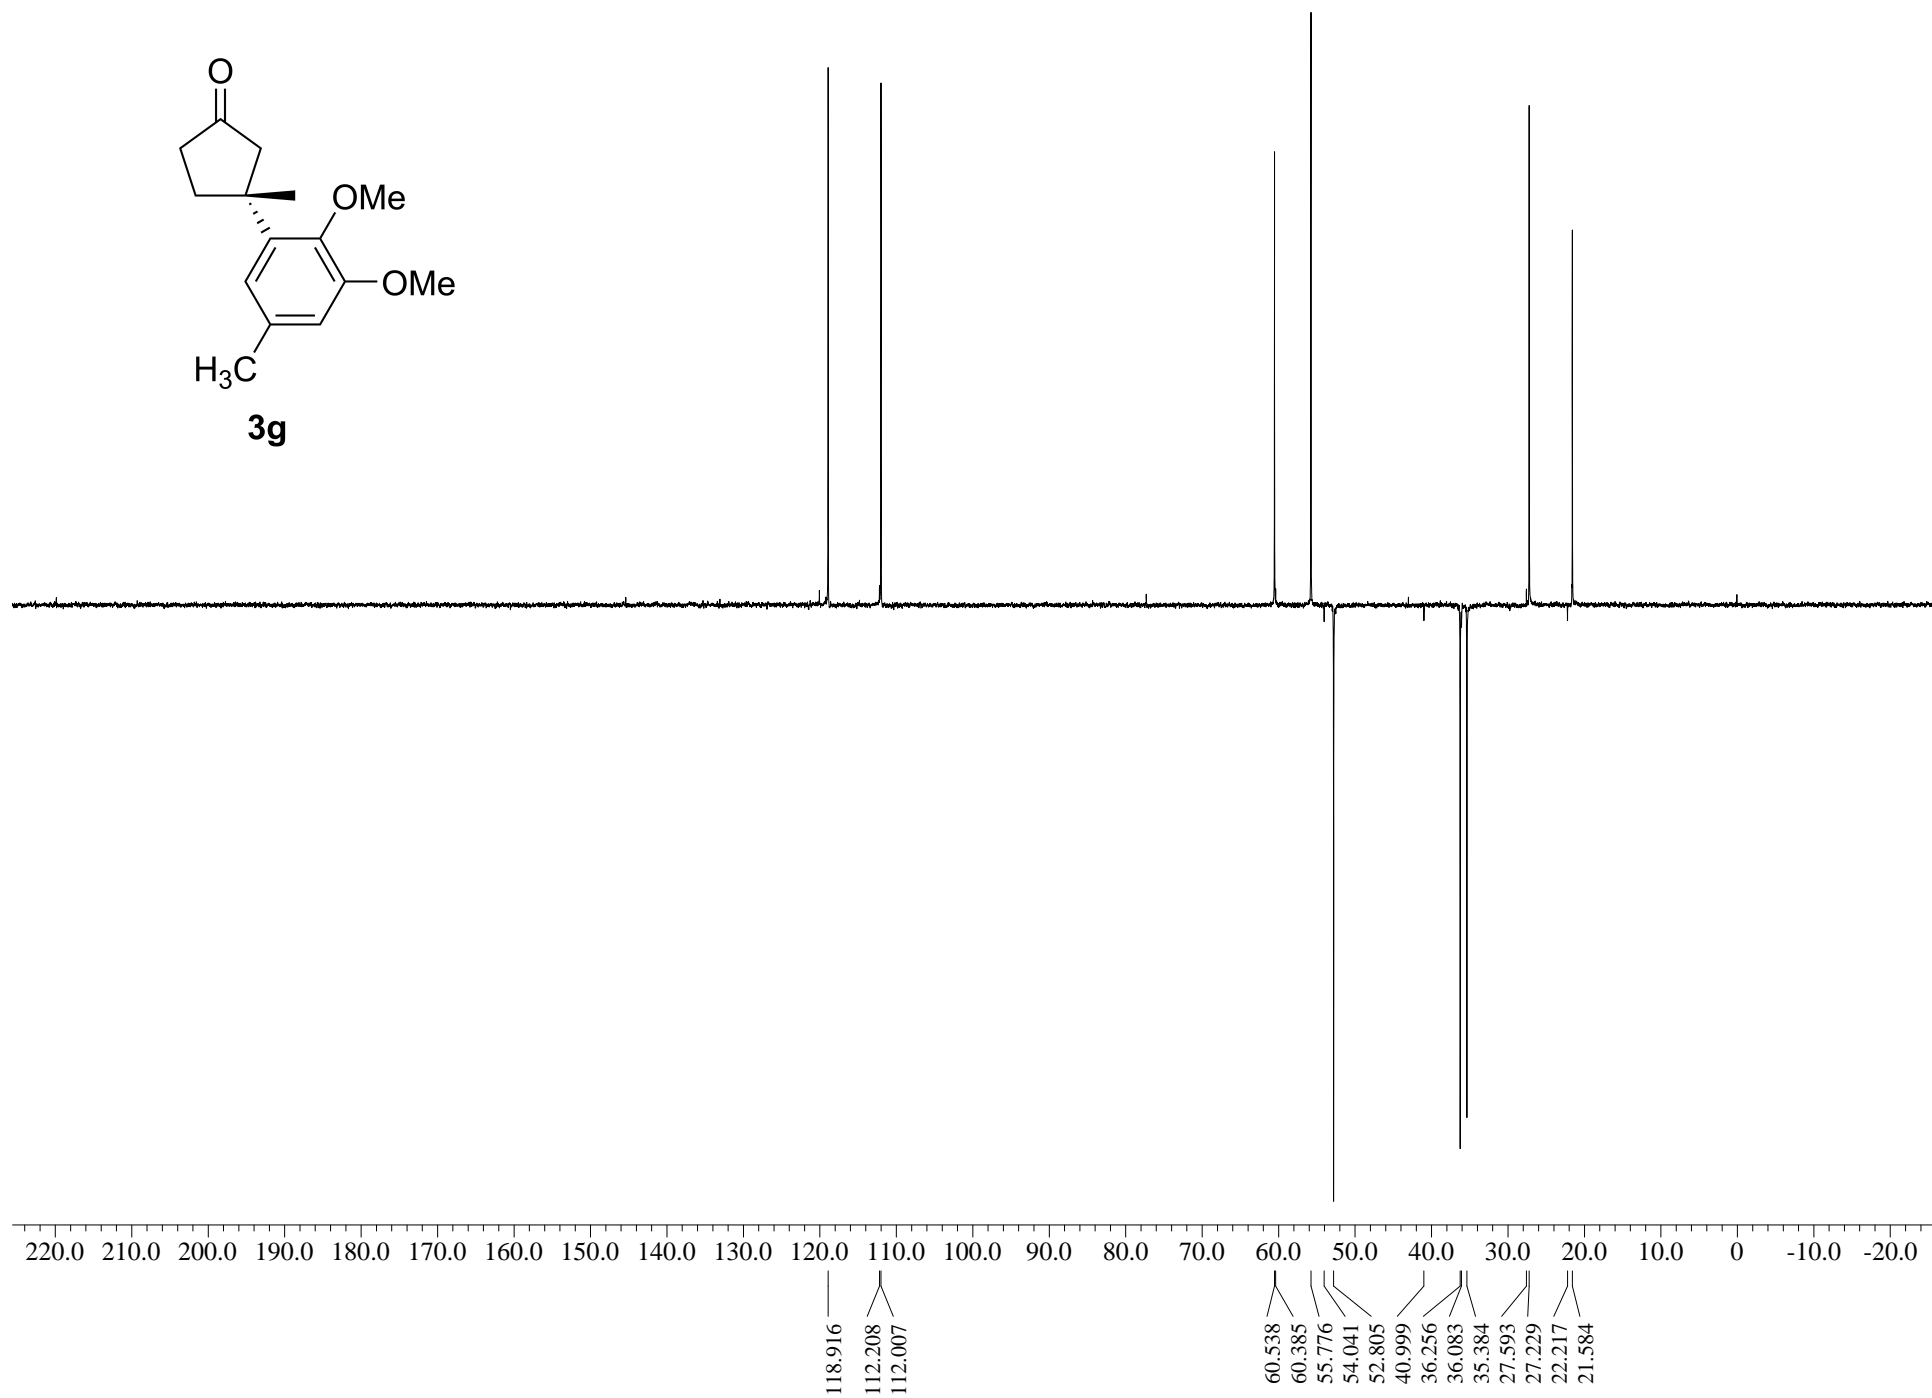

X : parts per Million : Carbon13

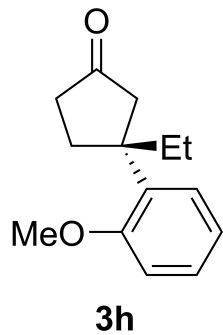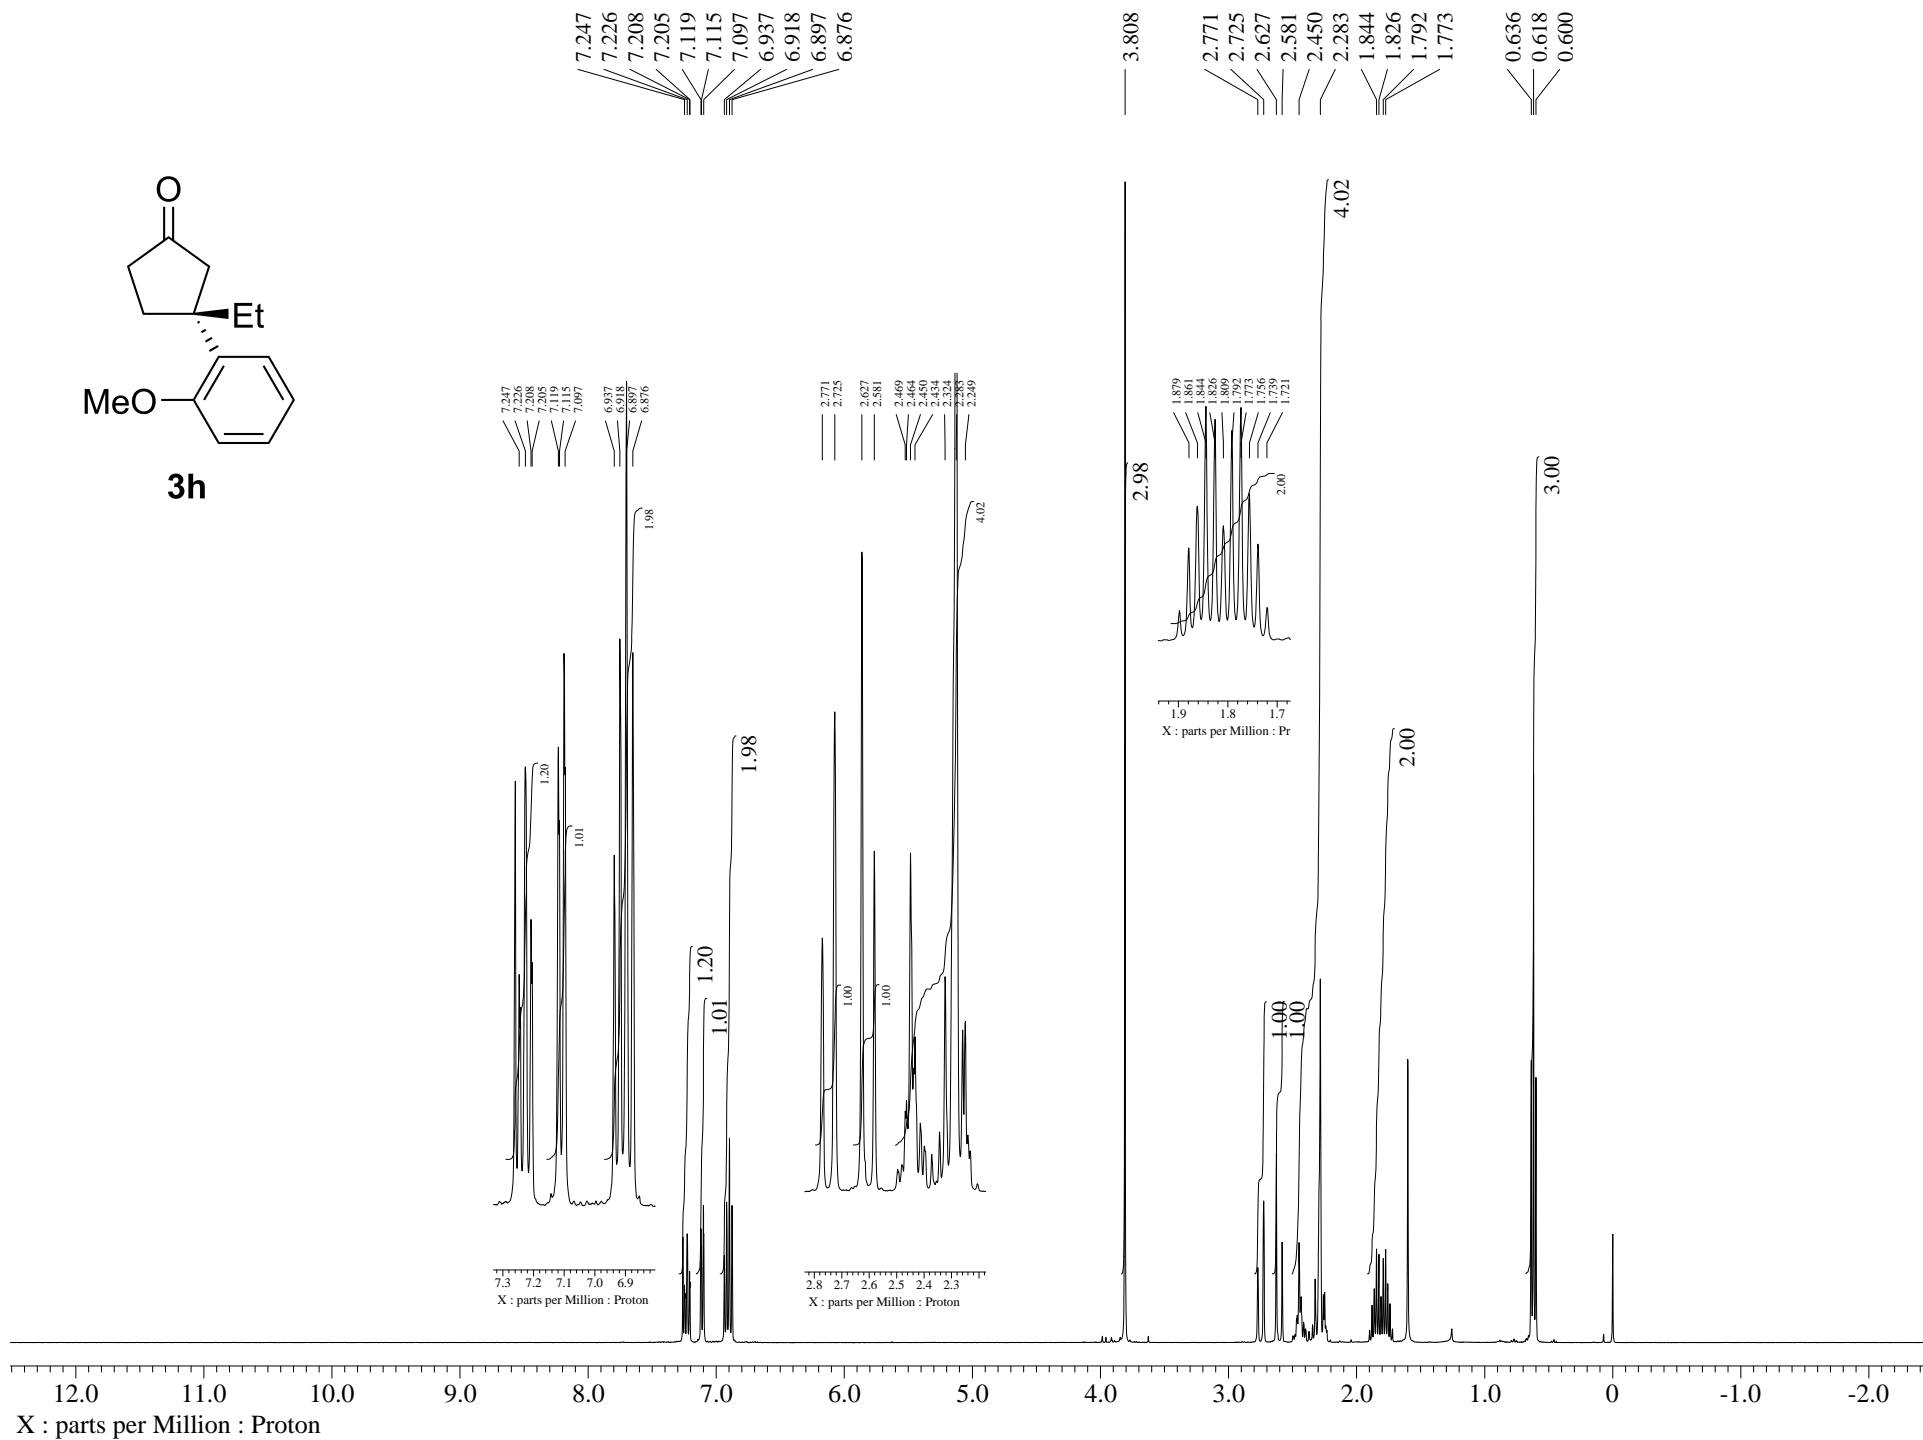

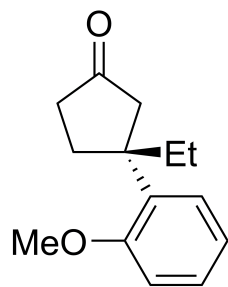

**3h**

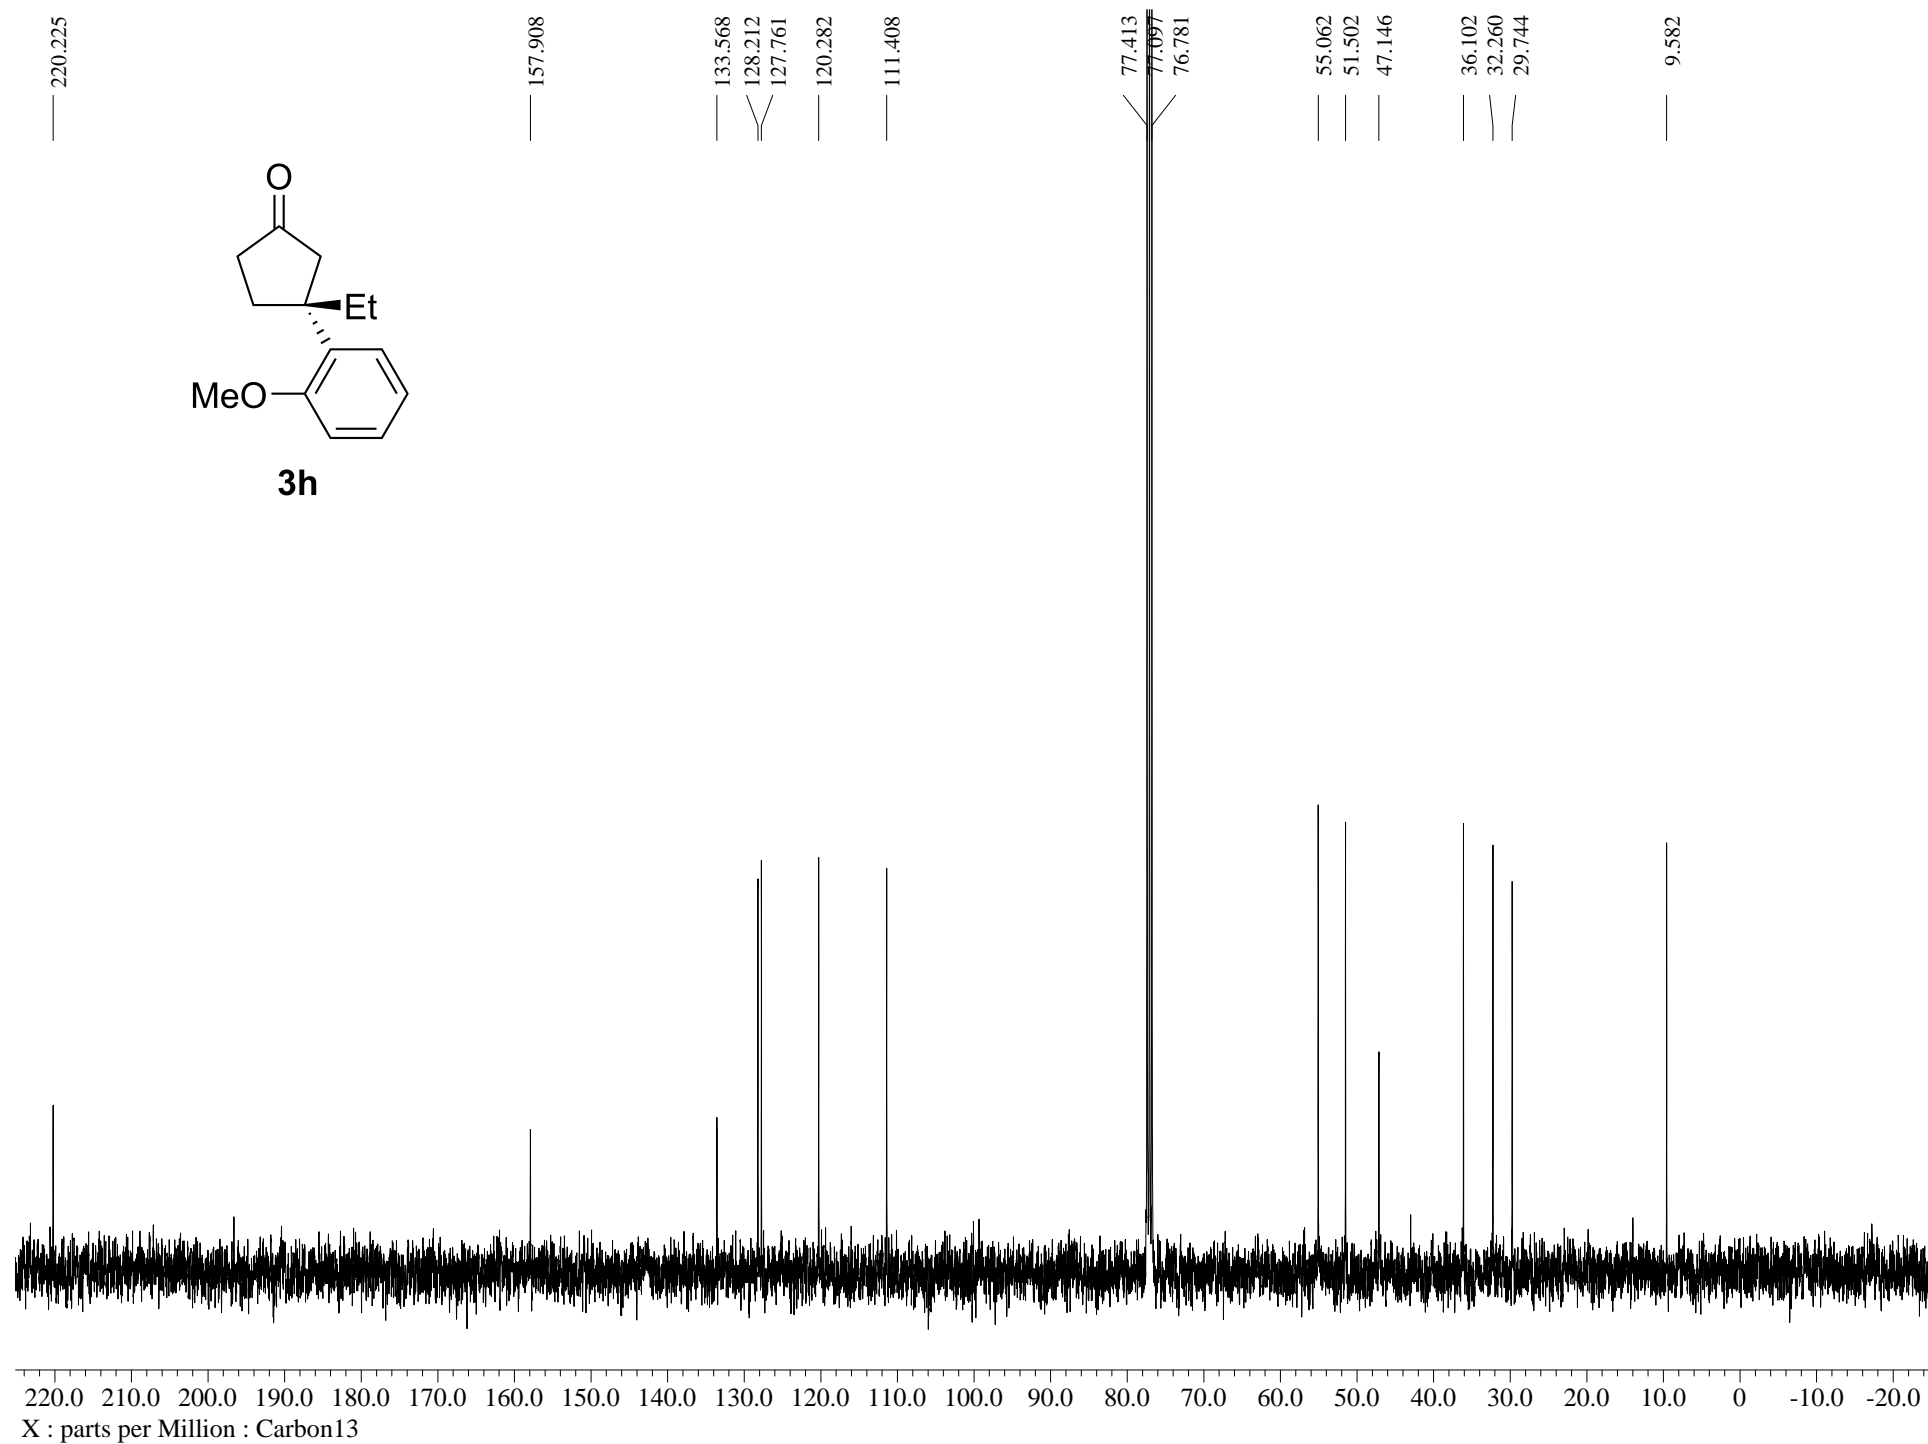



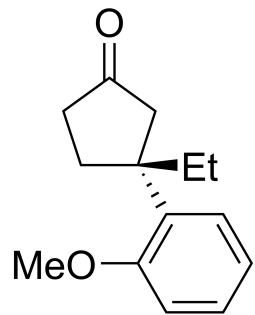

3h

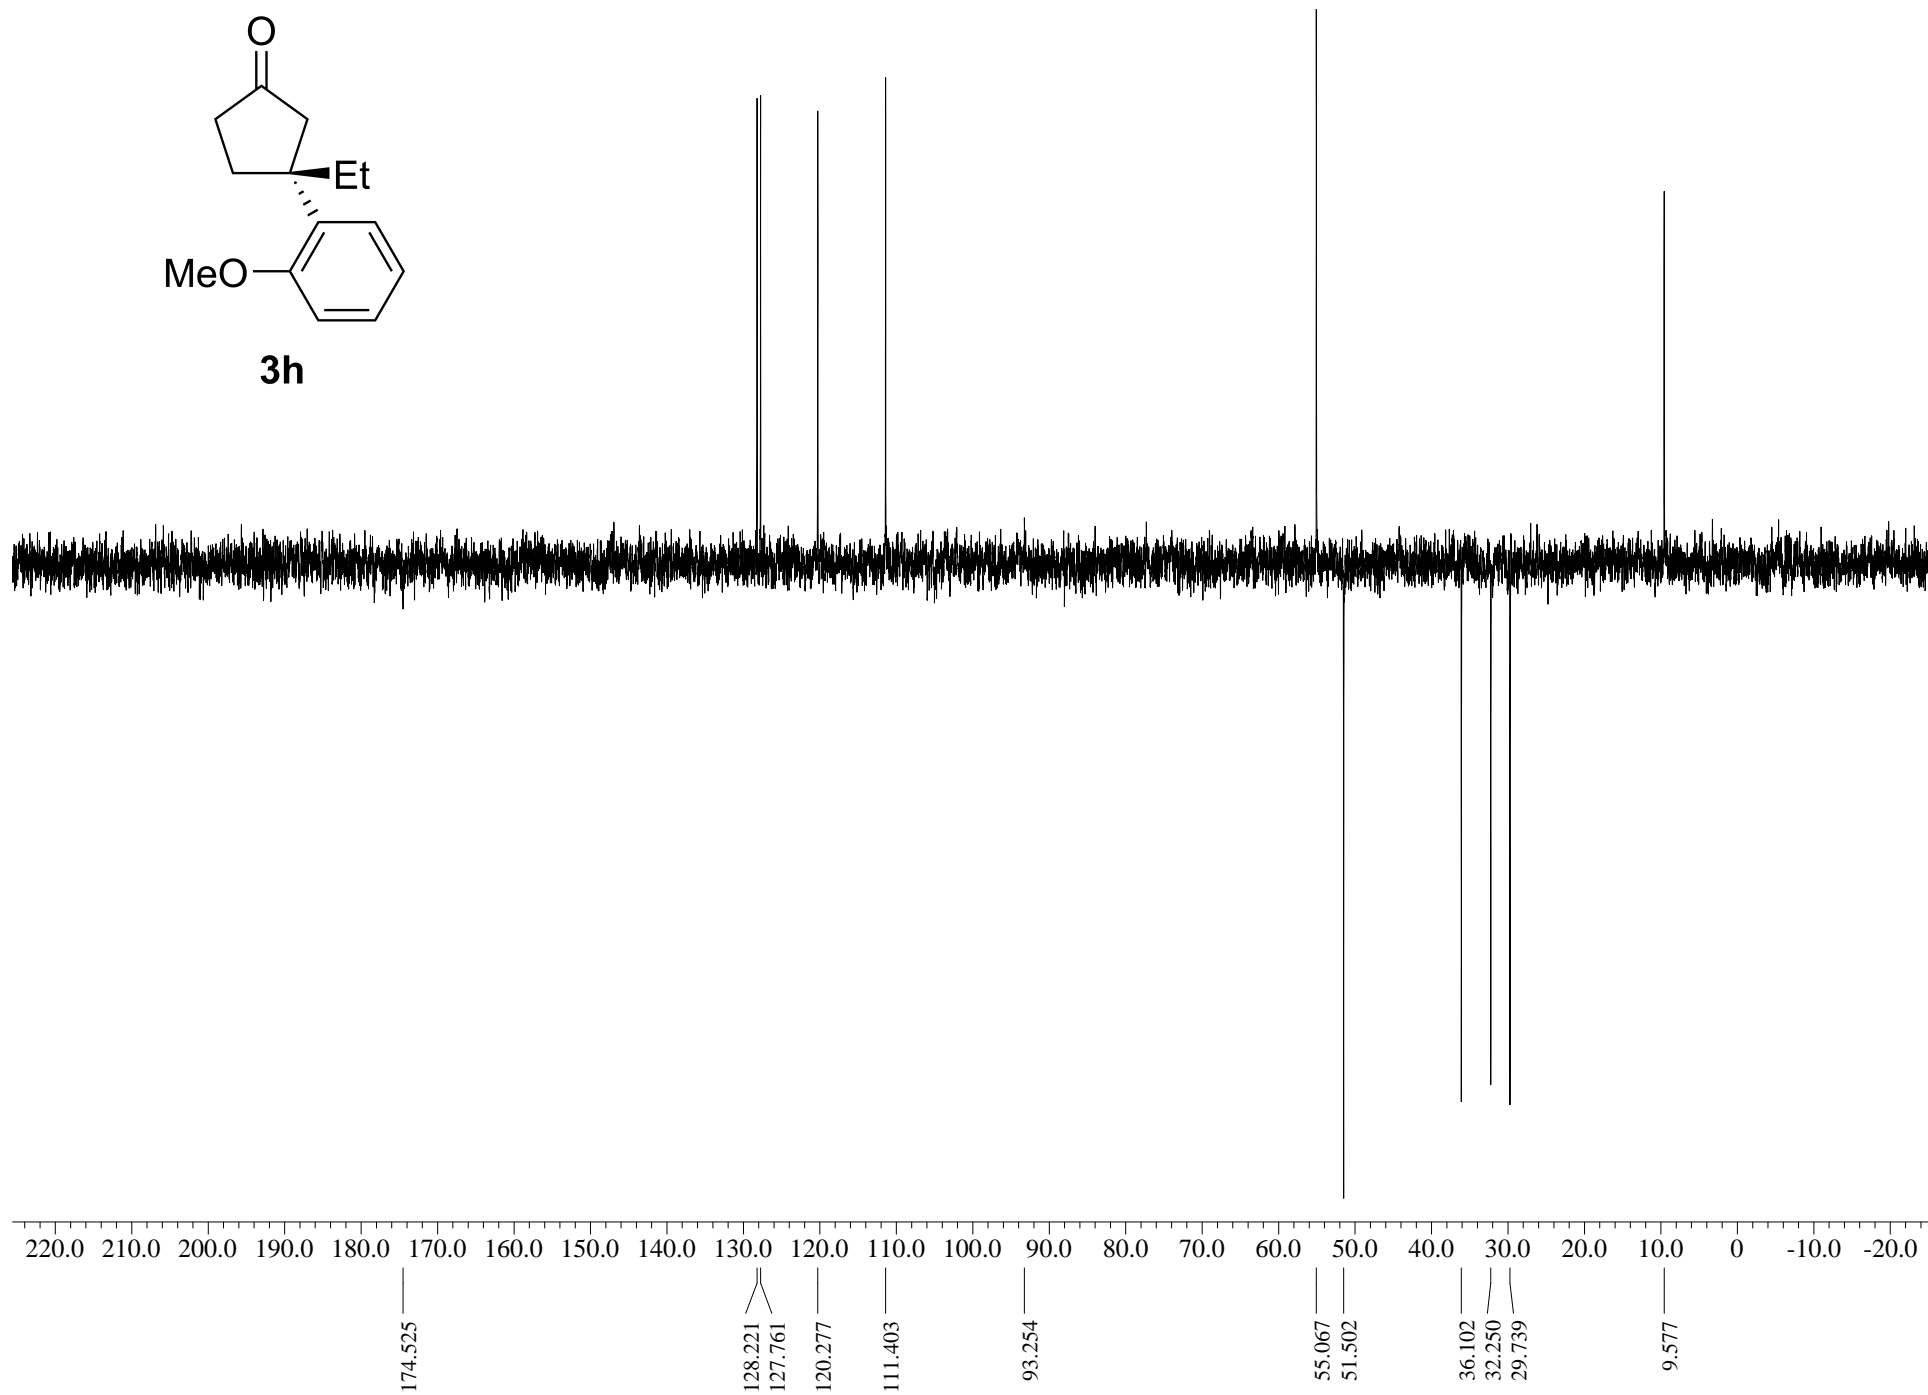

X : parts per Million : Carbon13

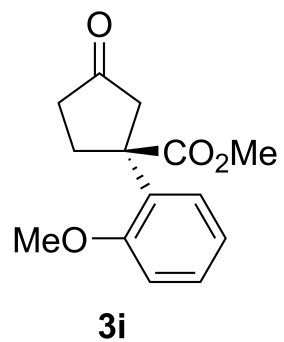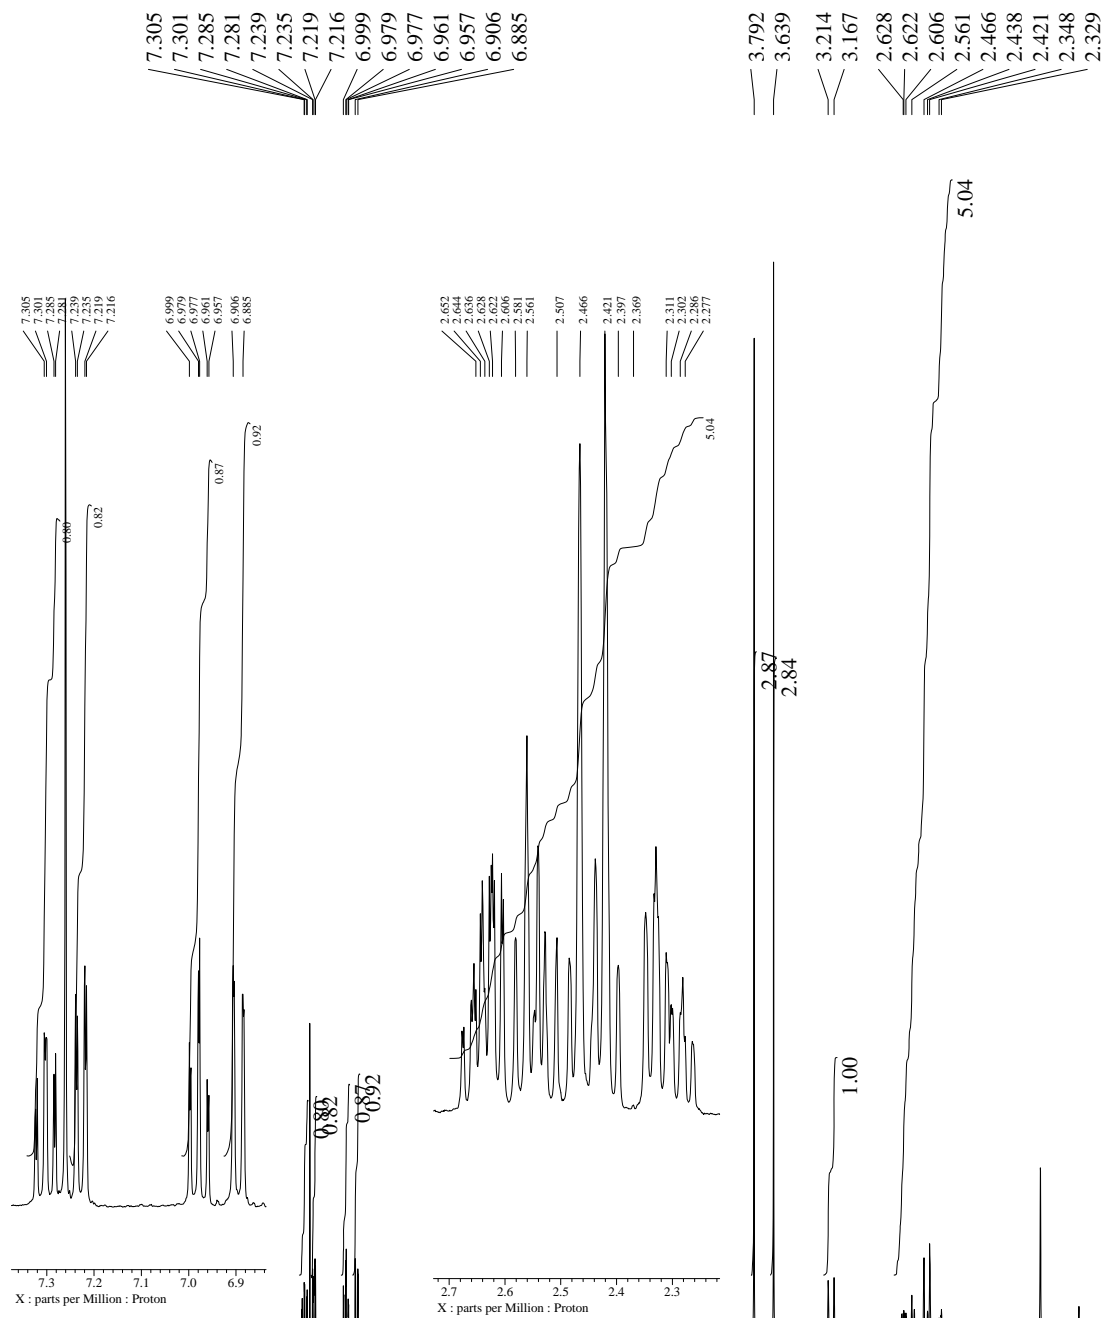

X : parts per Million : Proton

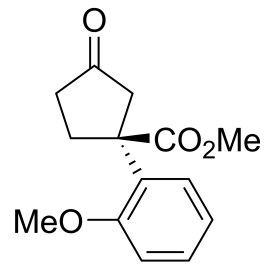

**3i**

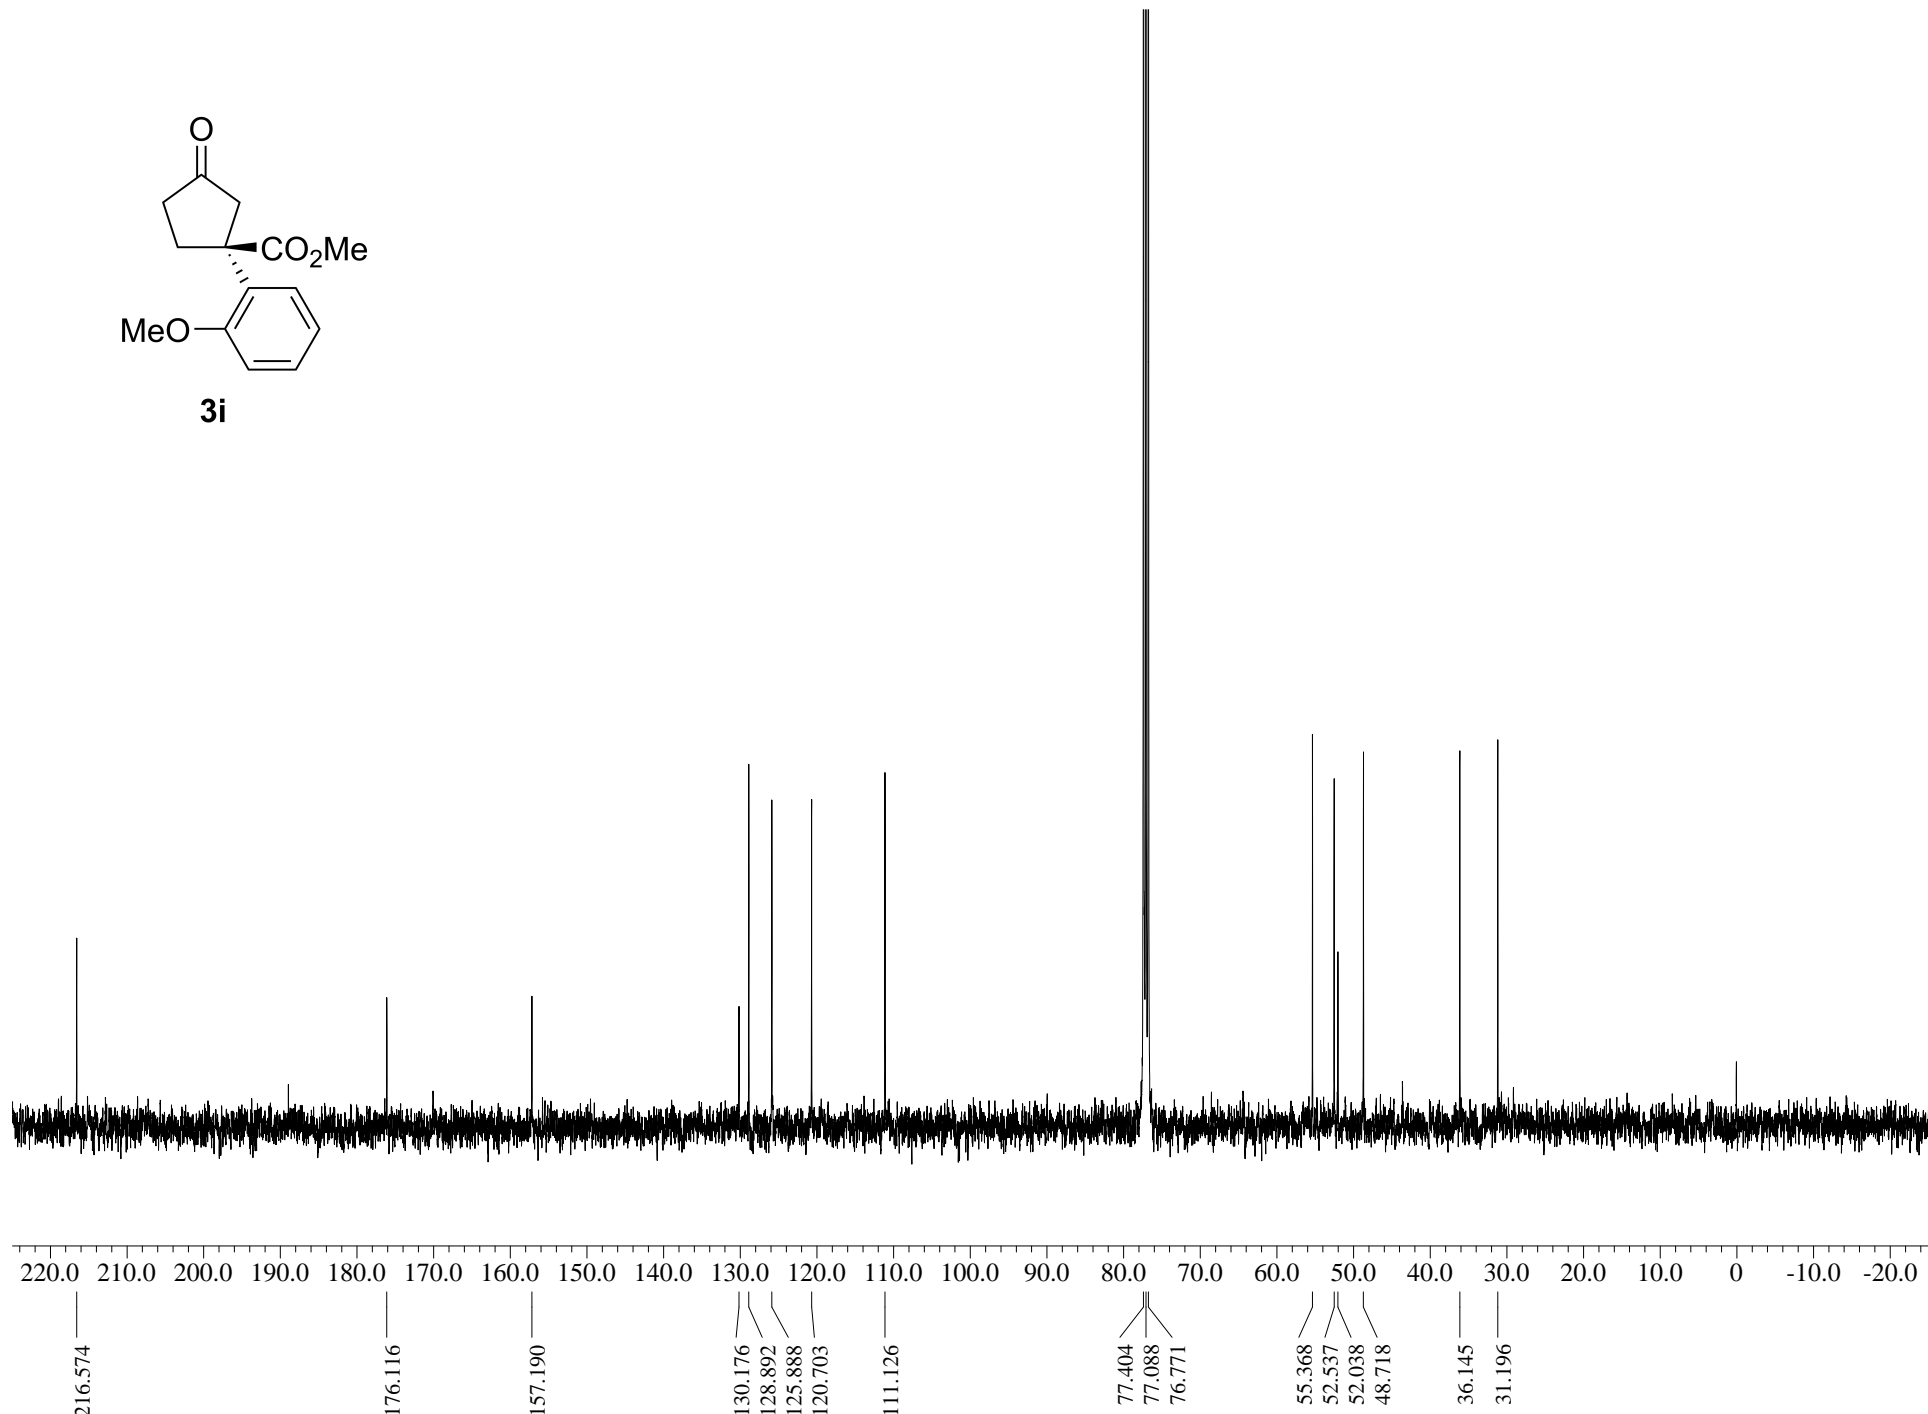

X : parts per Million : Carbon13

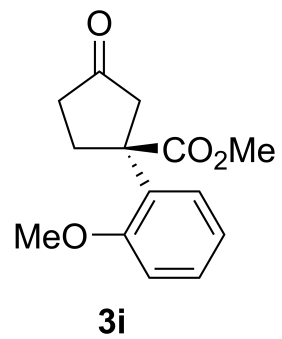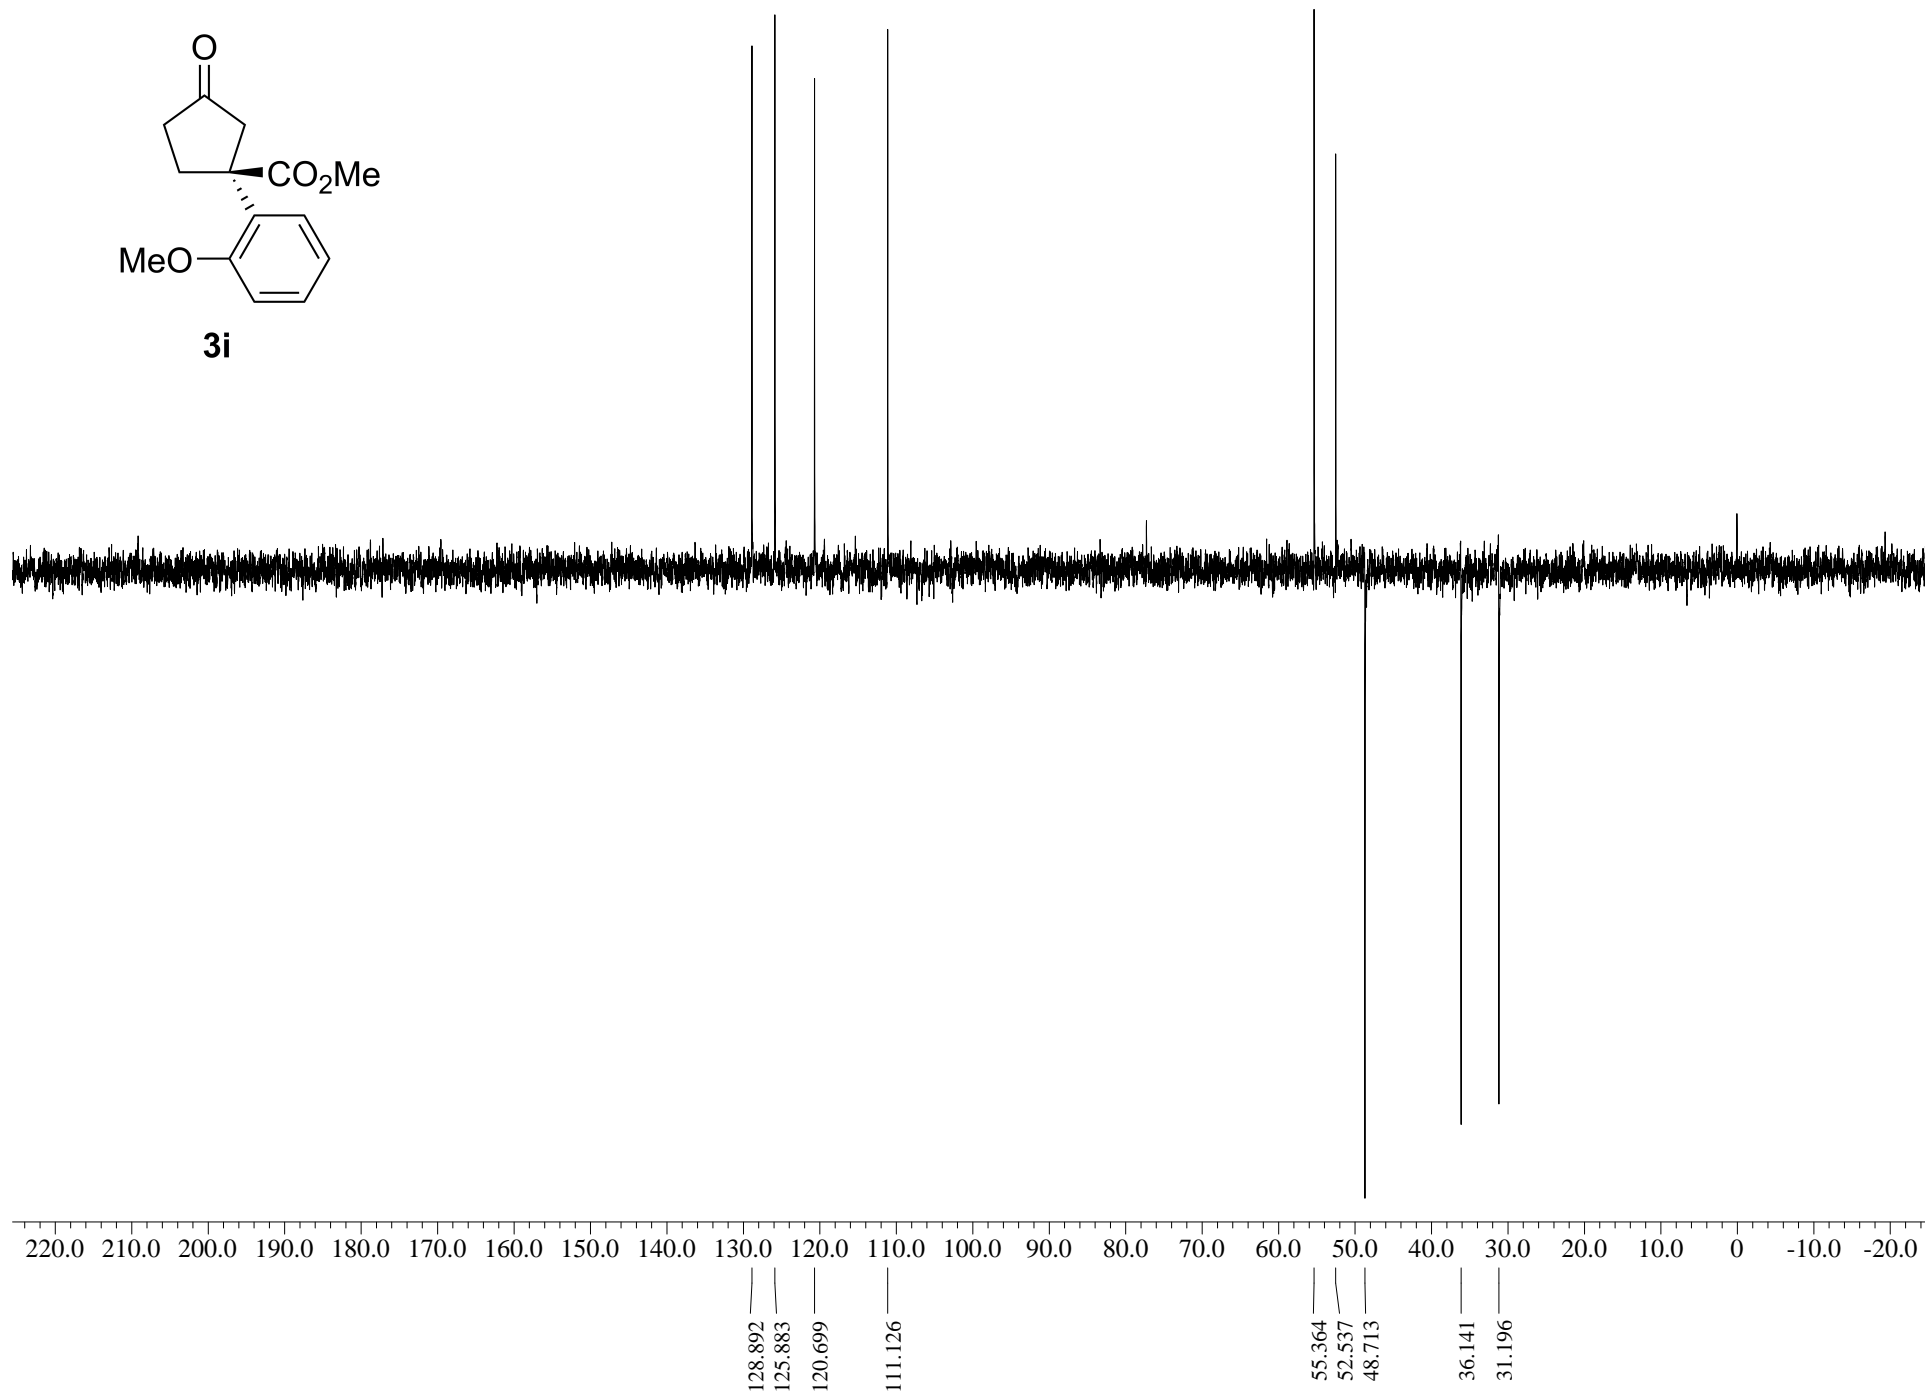

X : parts per Million : Carbon13

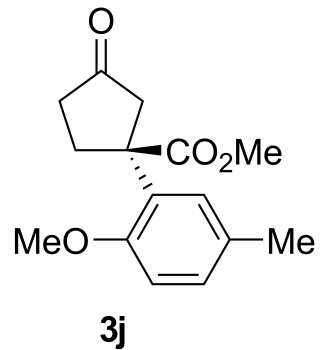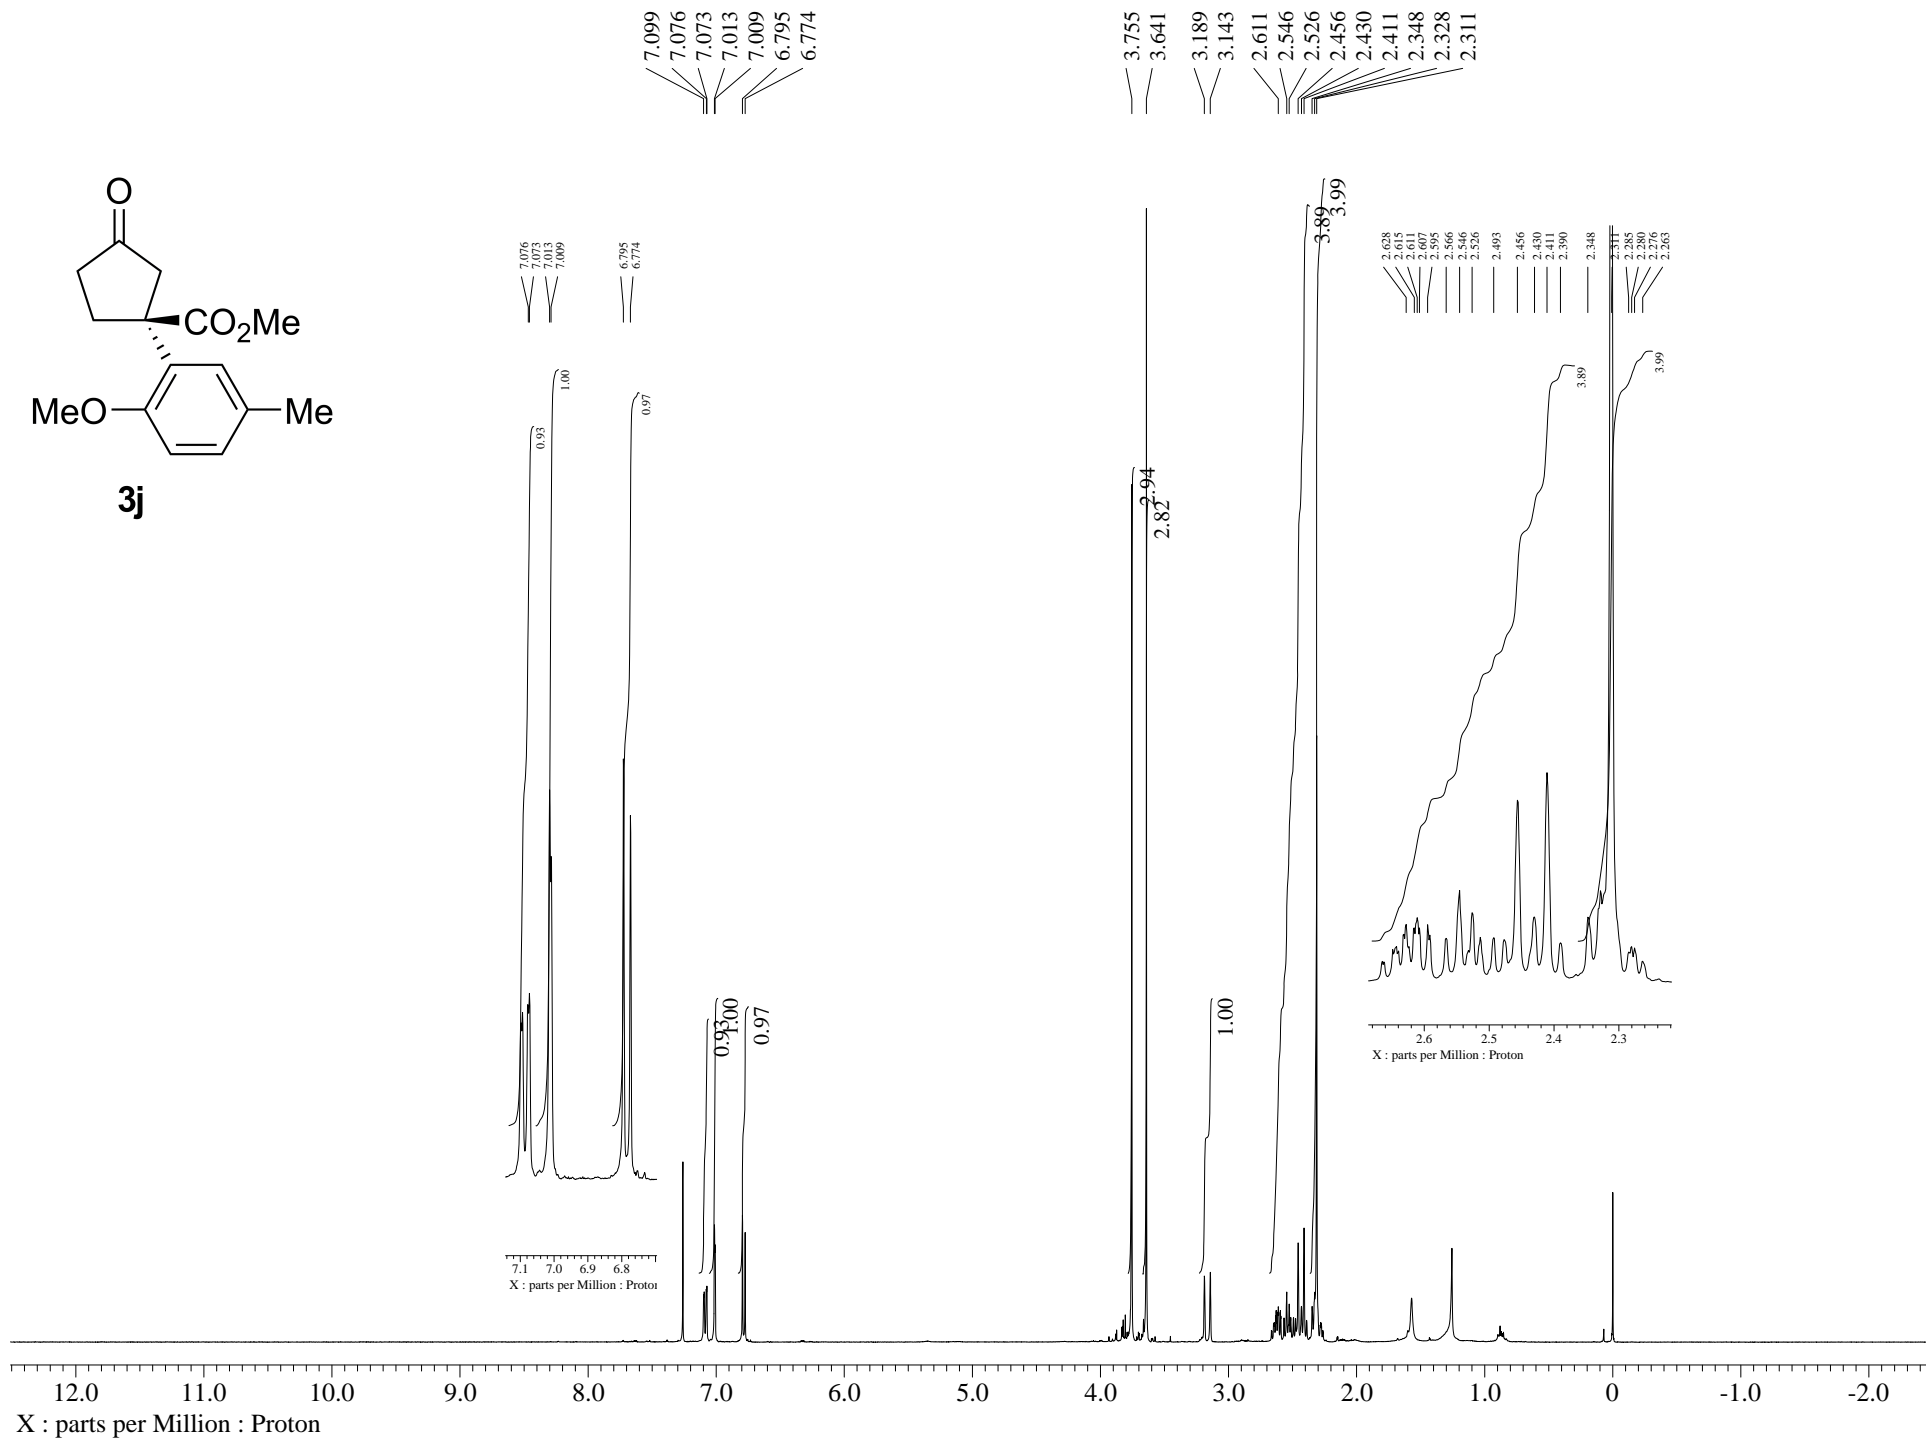



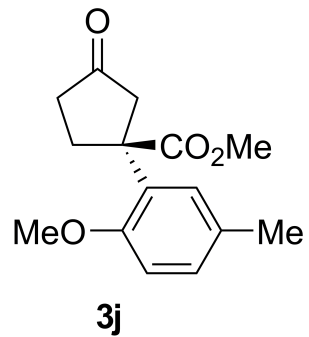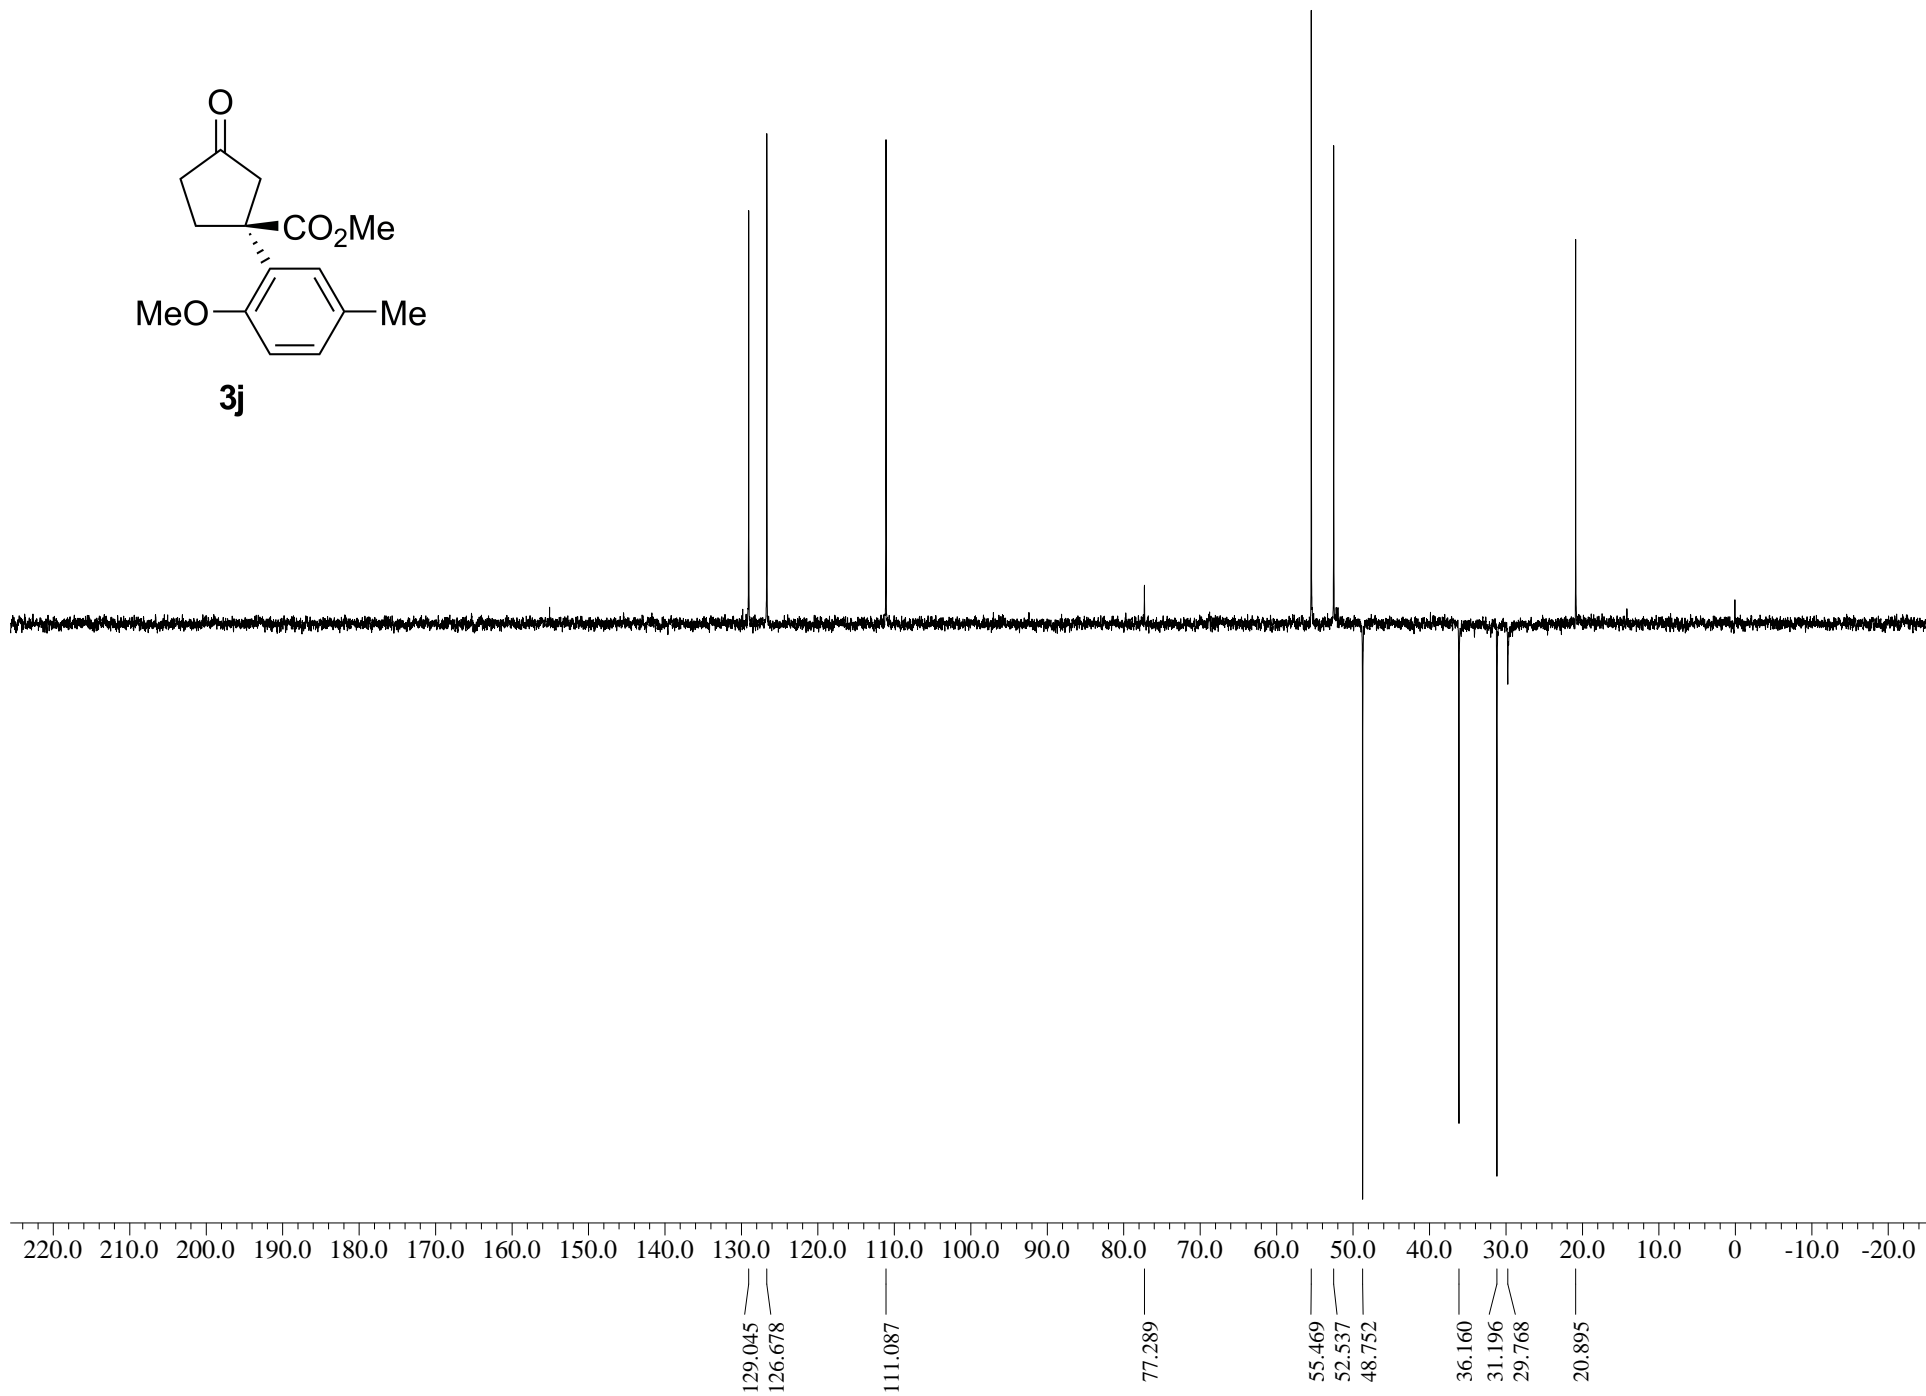

X : parts per Million : Carbon13

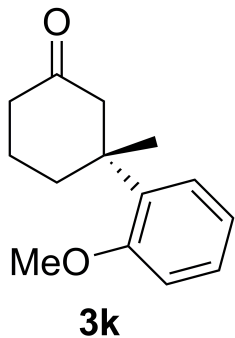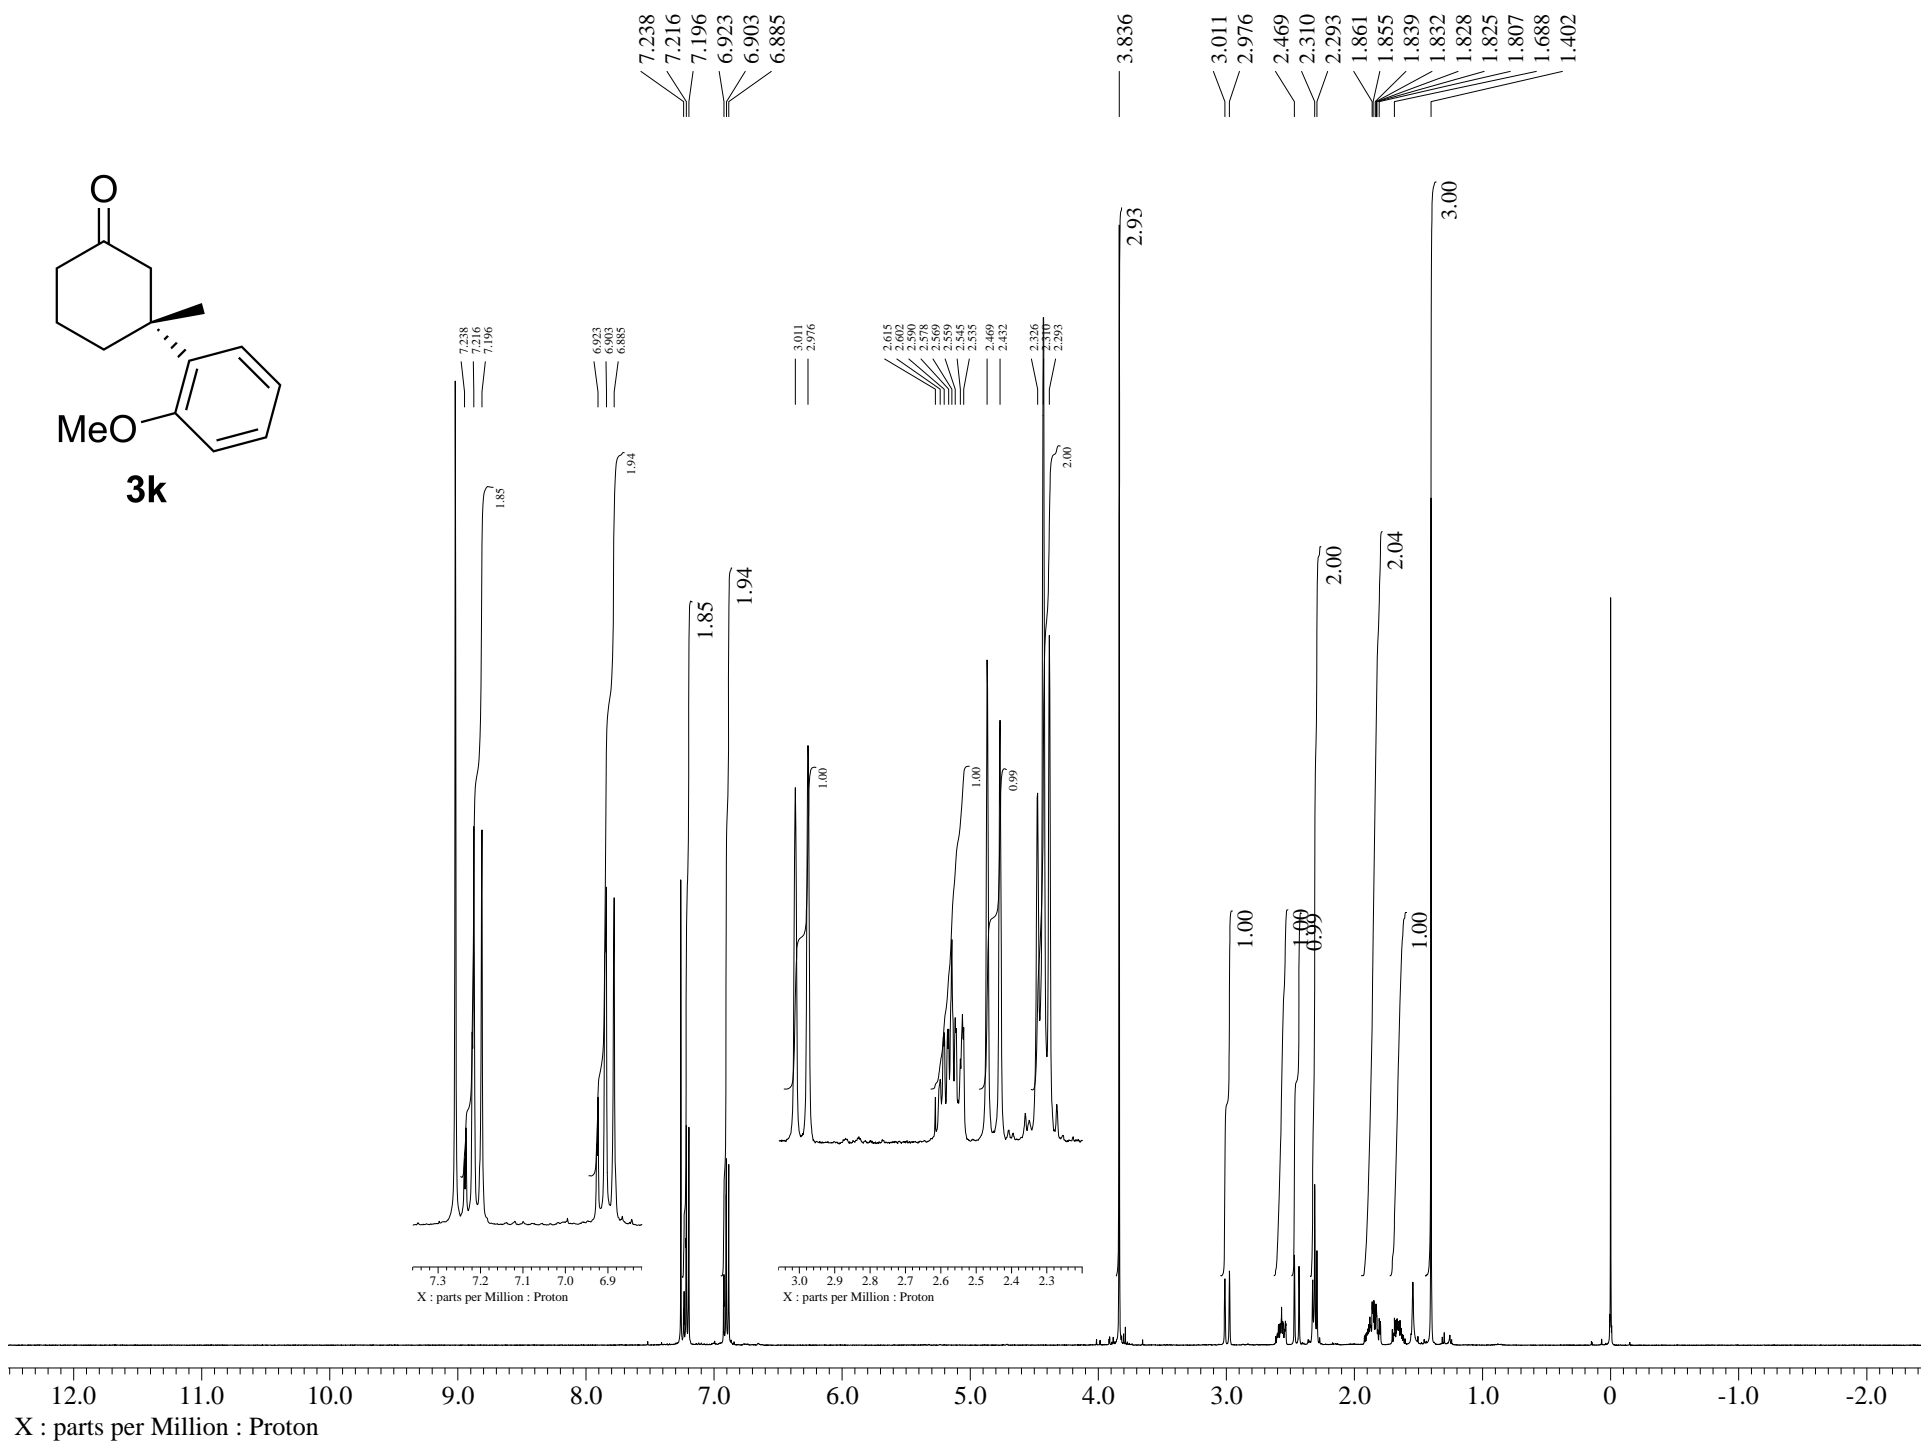



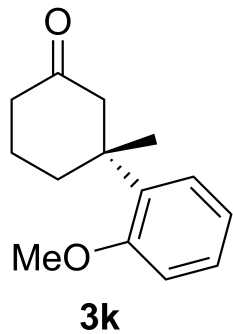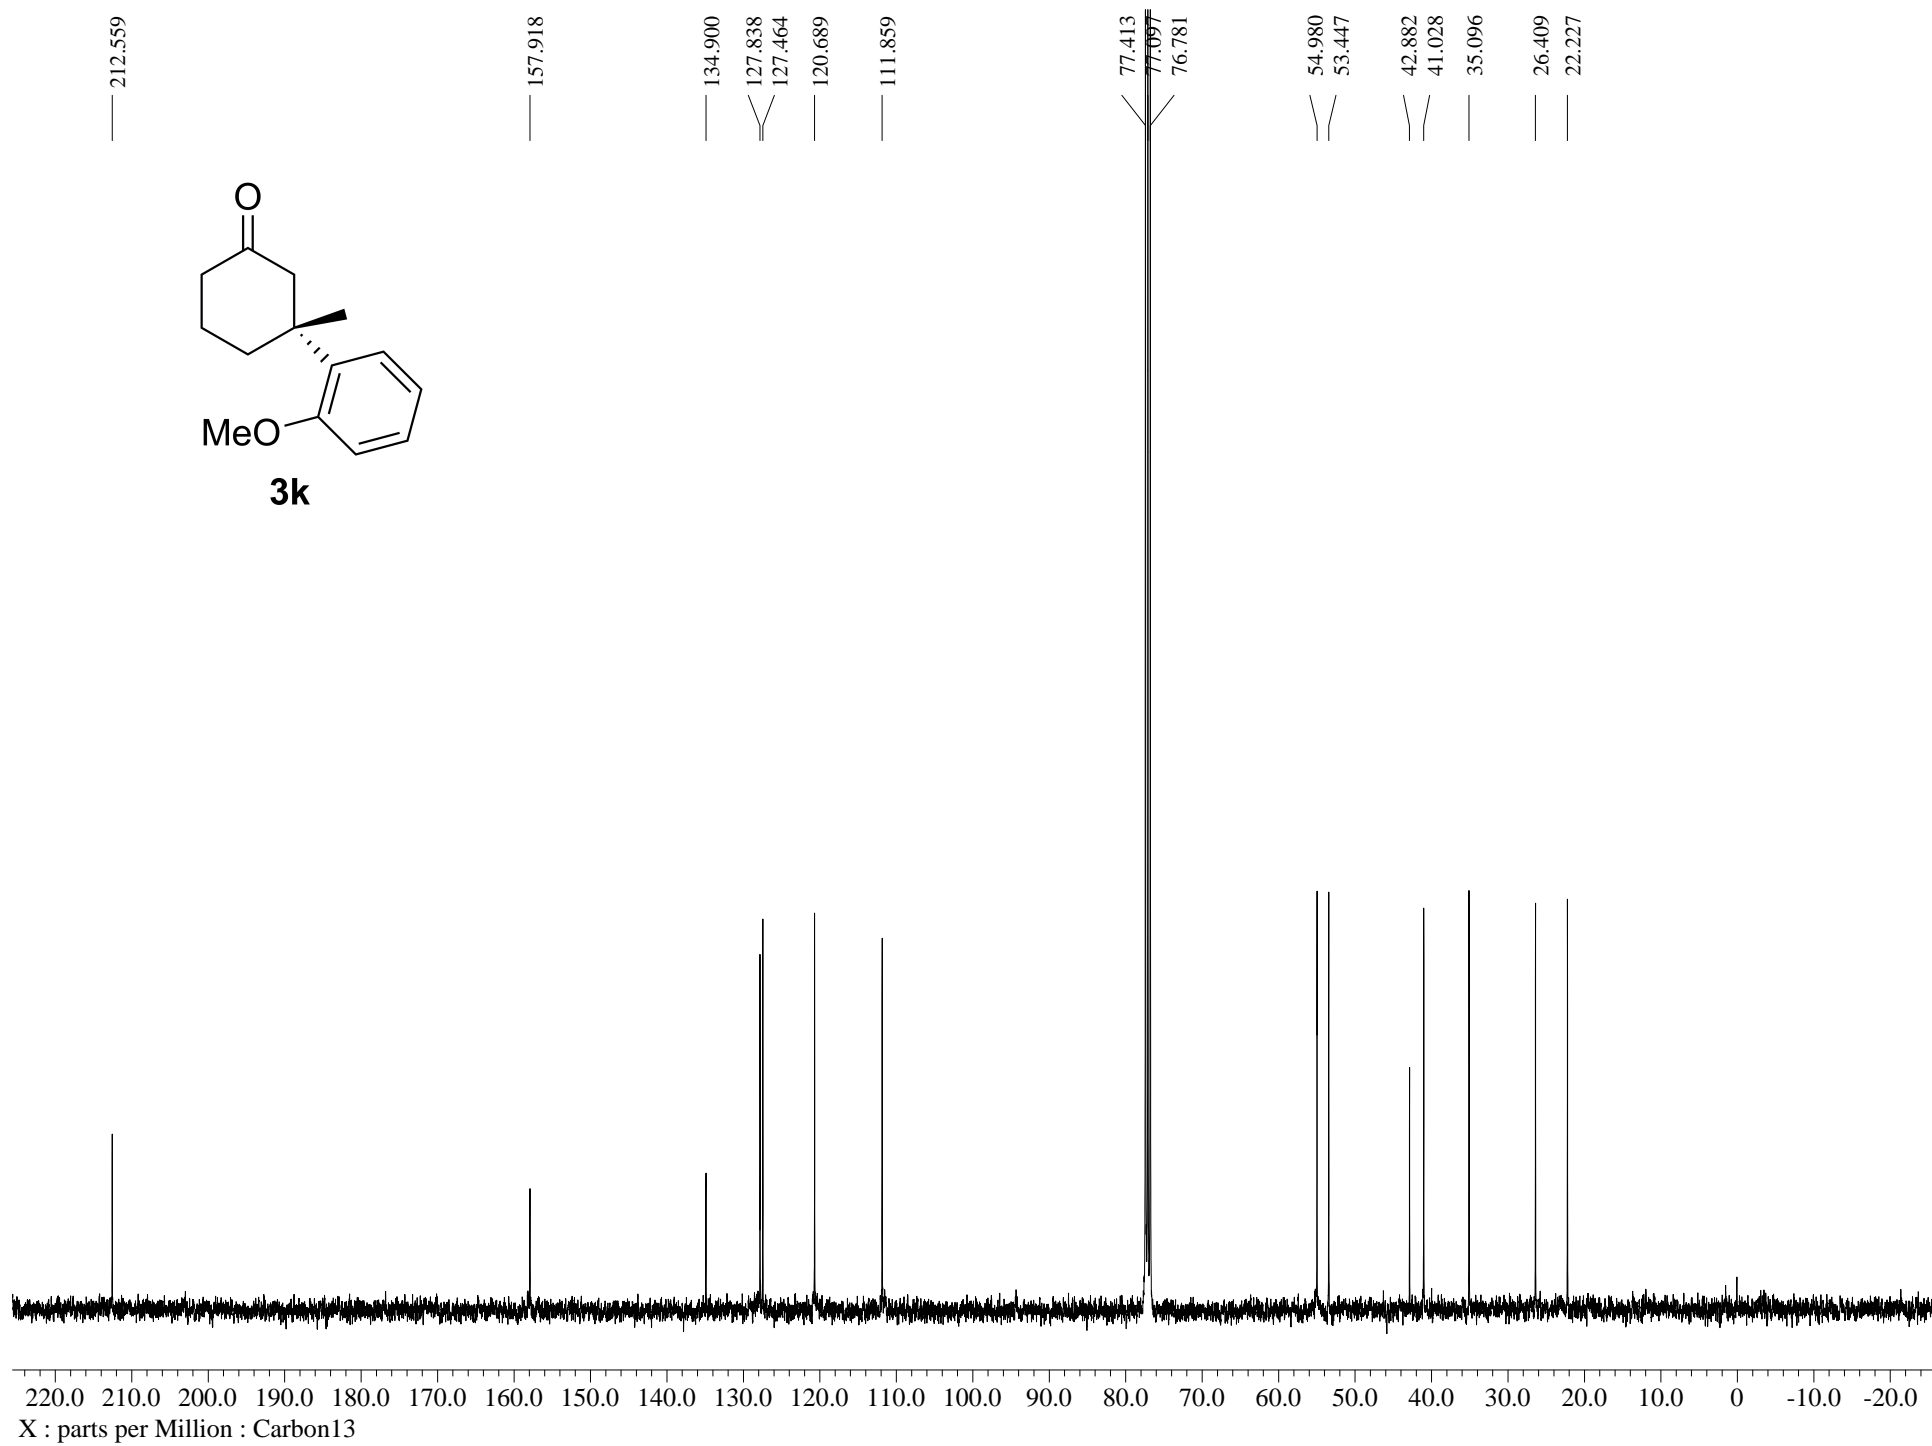

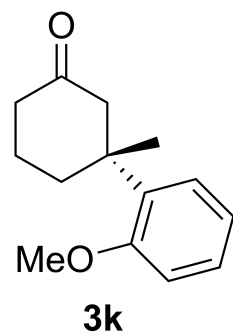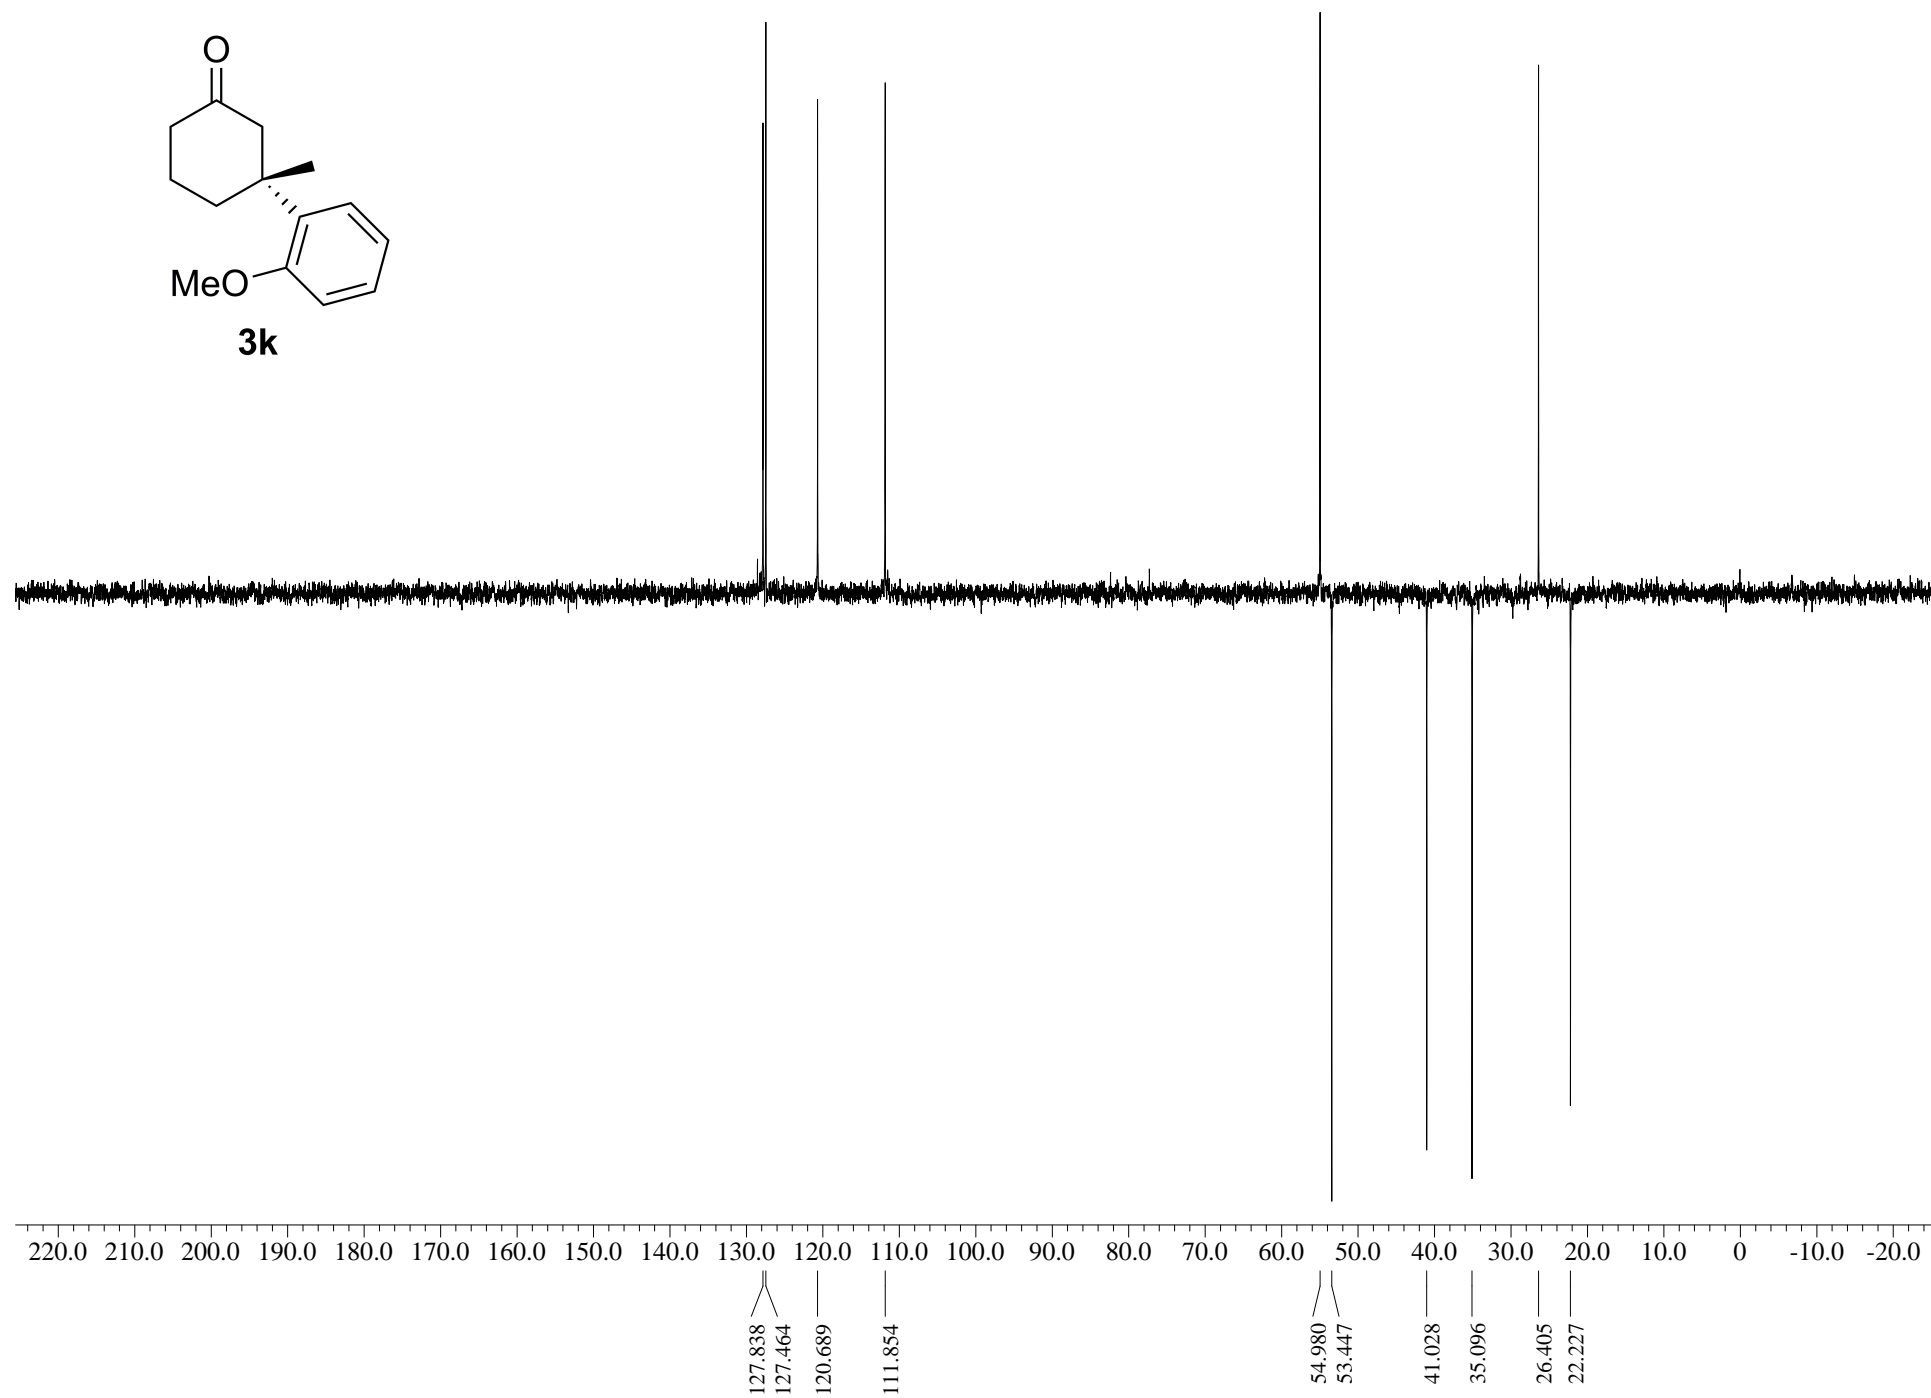

X : parts per Million : Carbon13

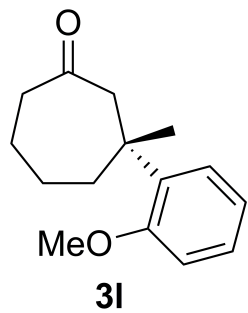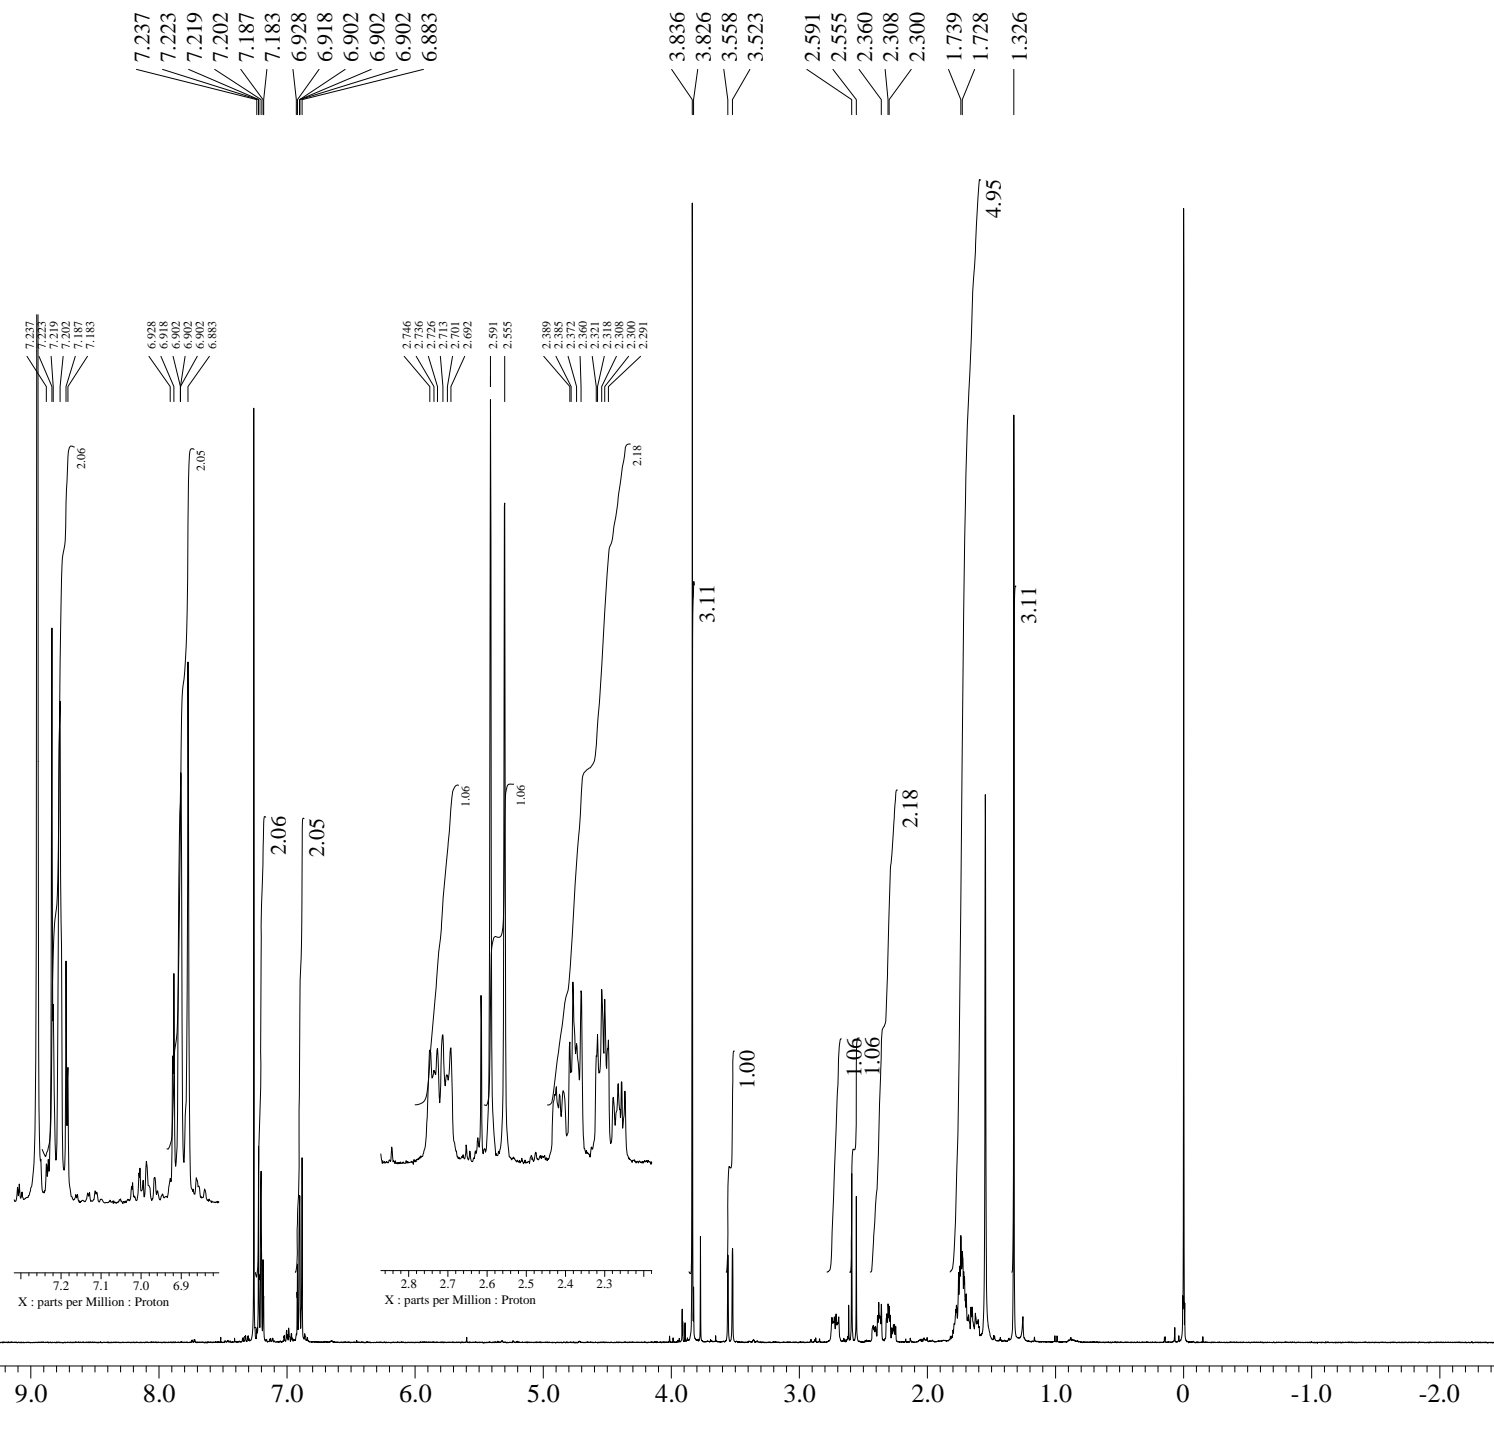

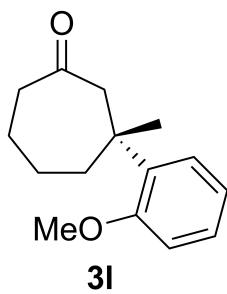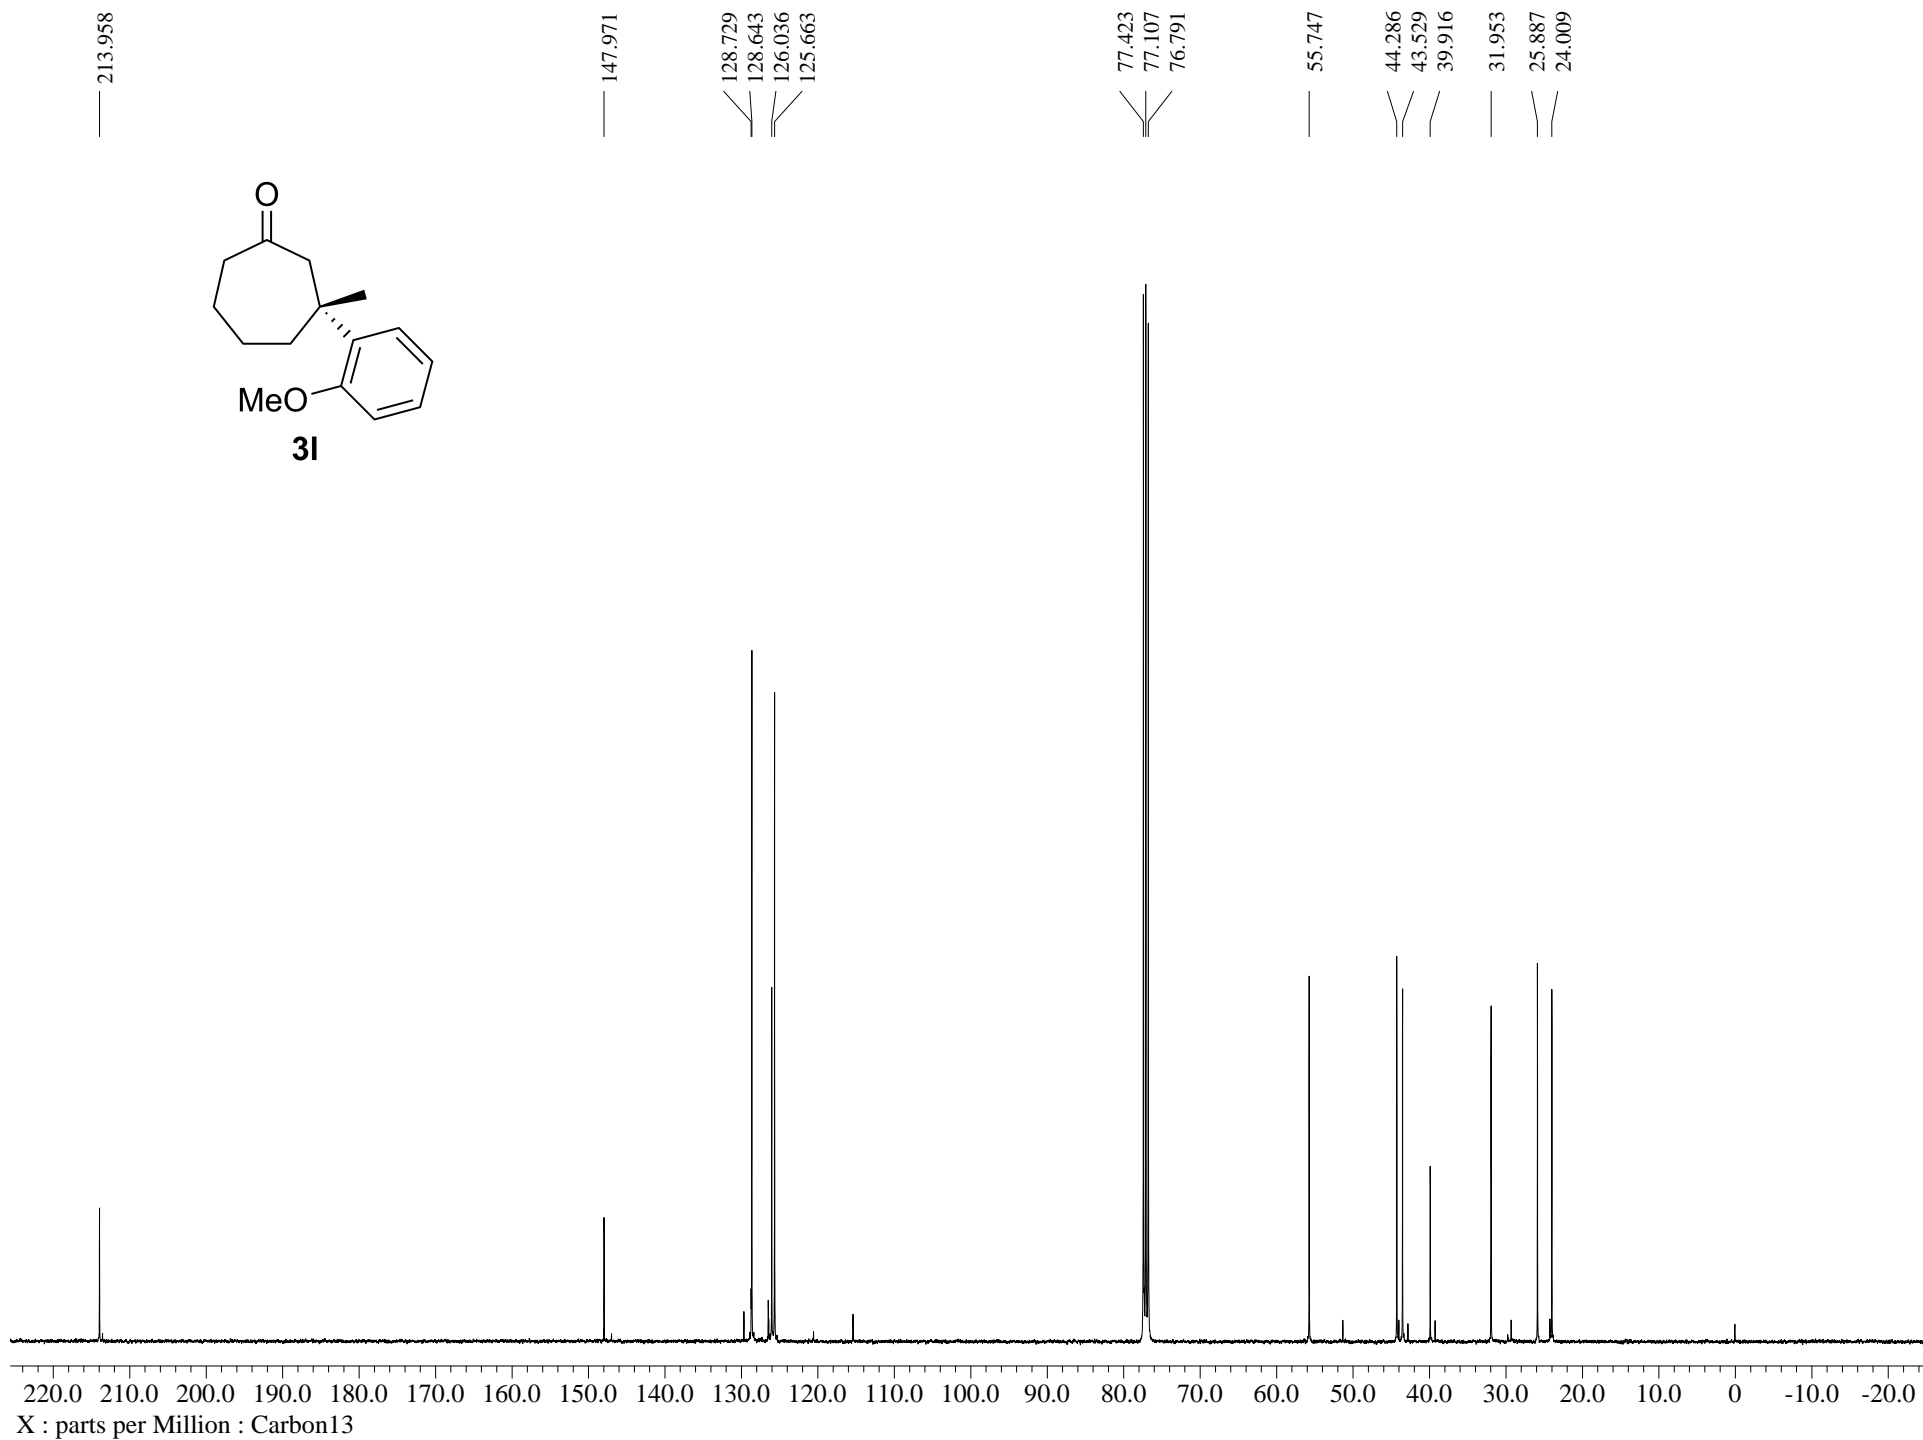

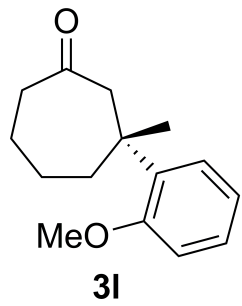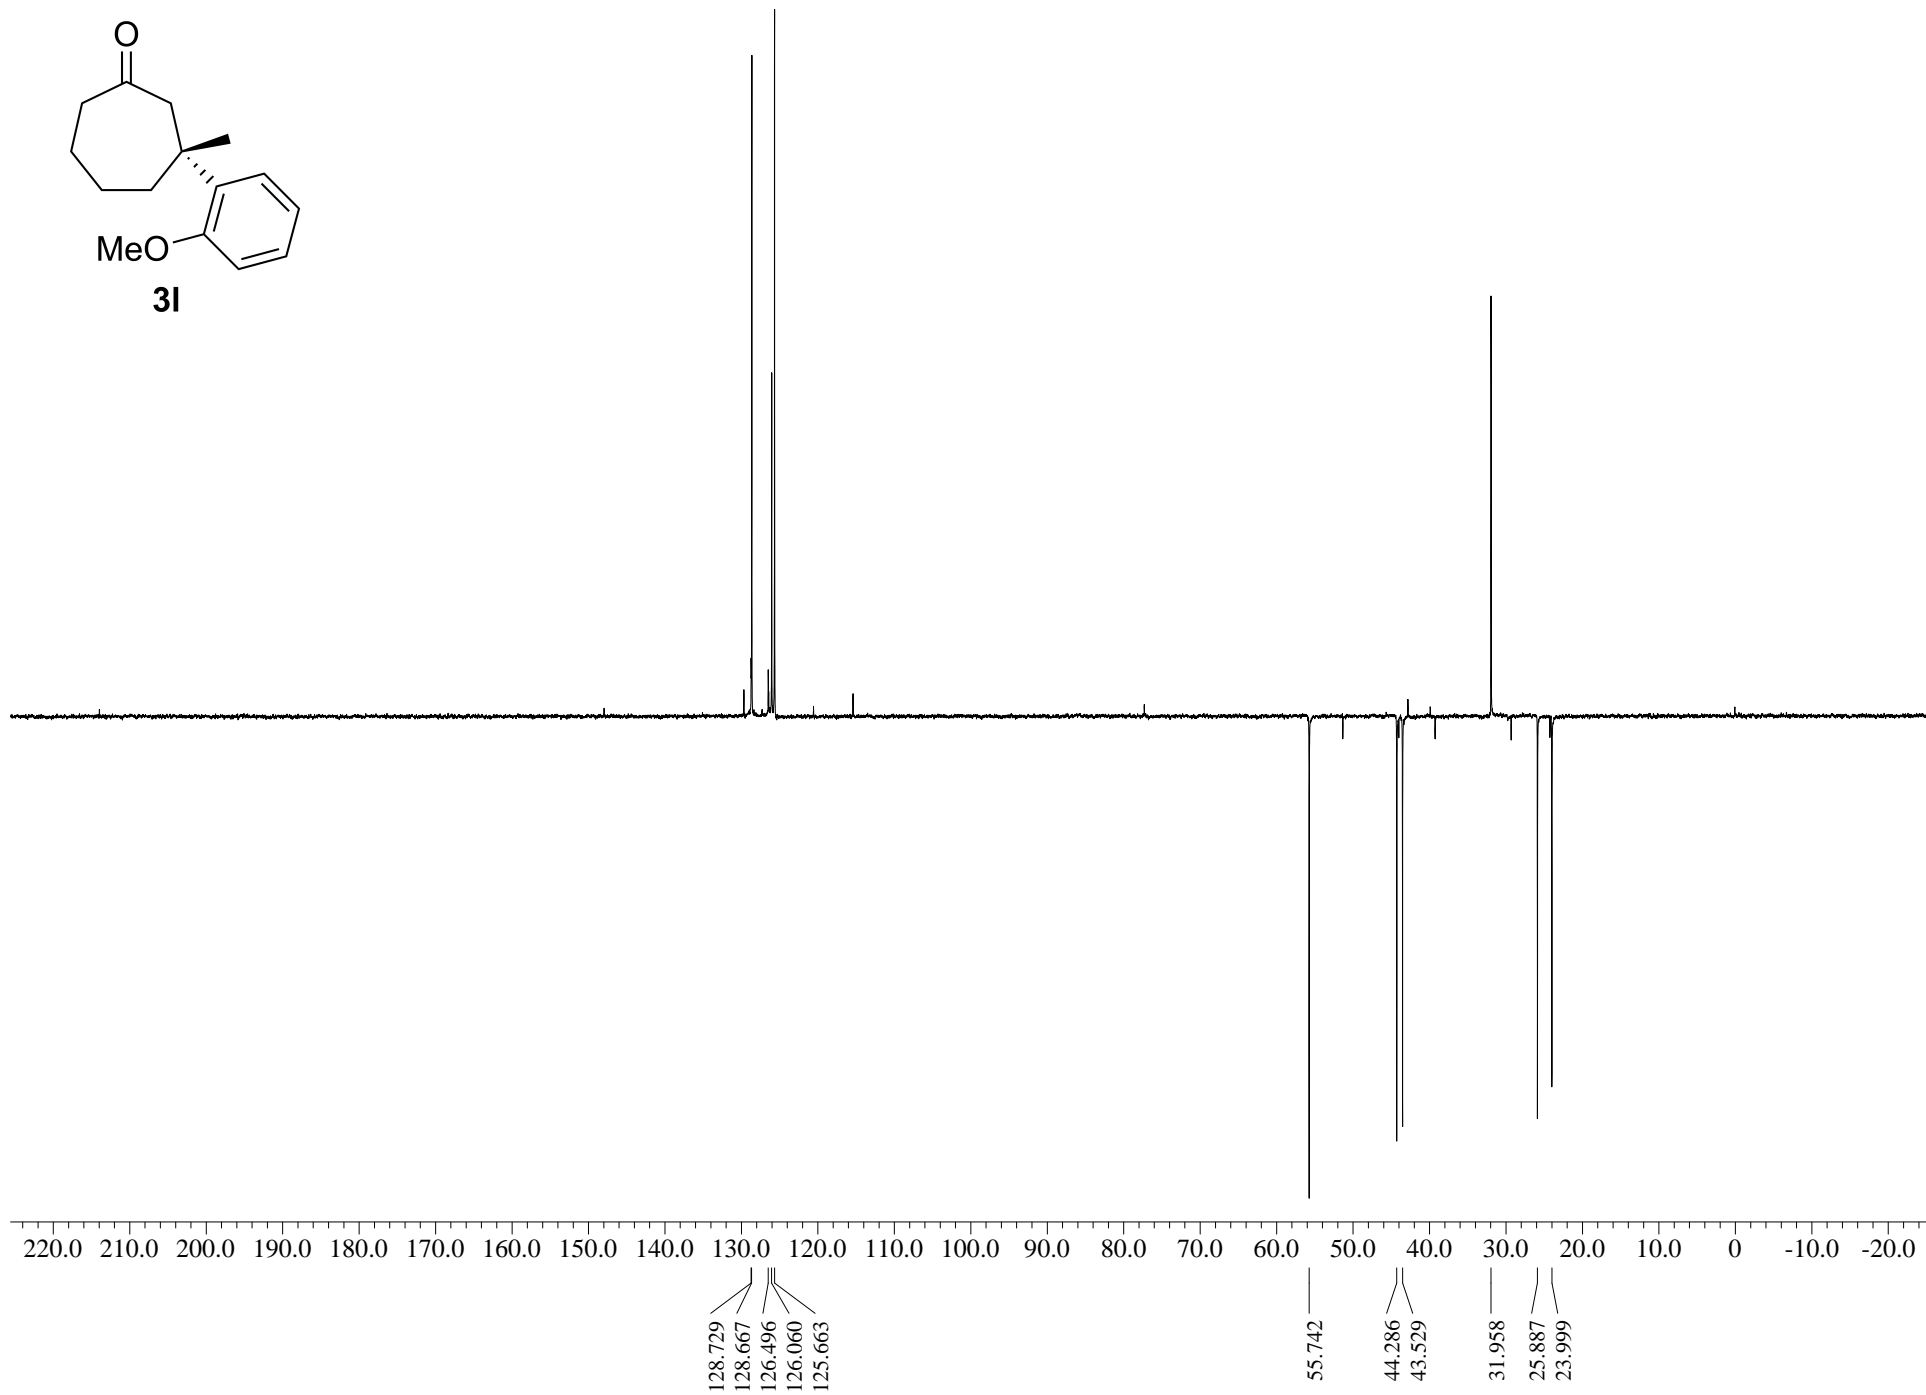

X : parts per Million : Carbon13

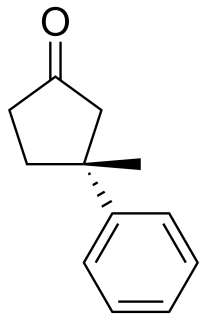

3n

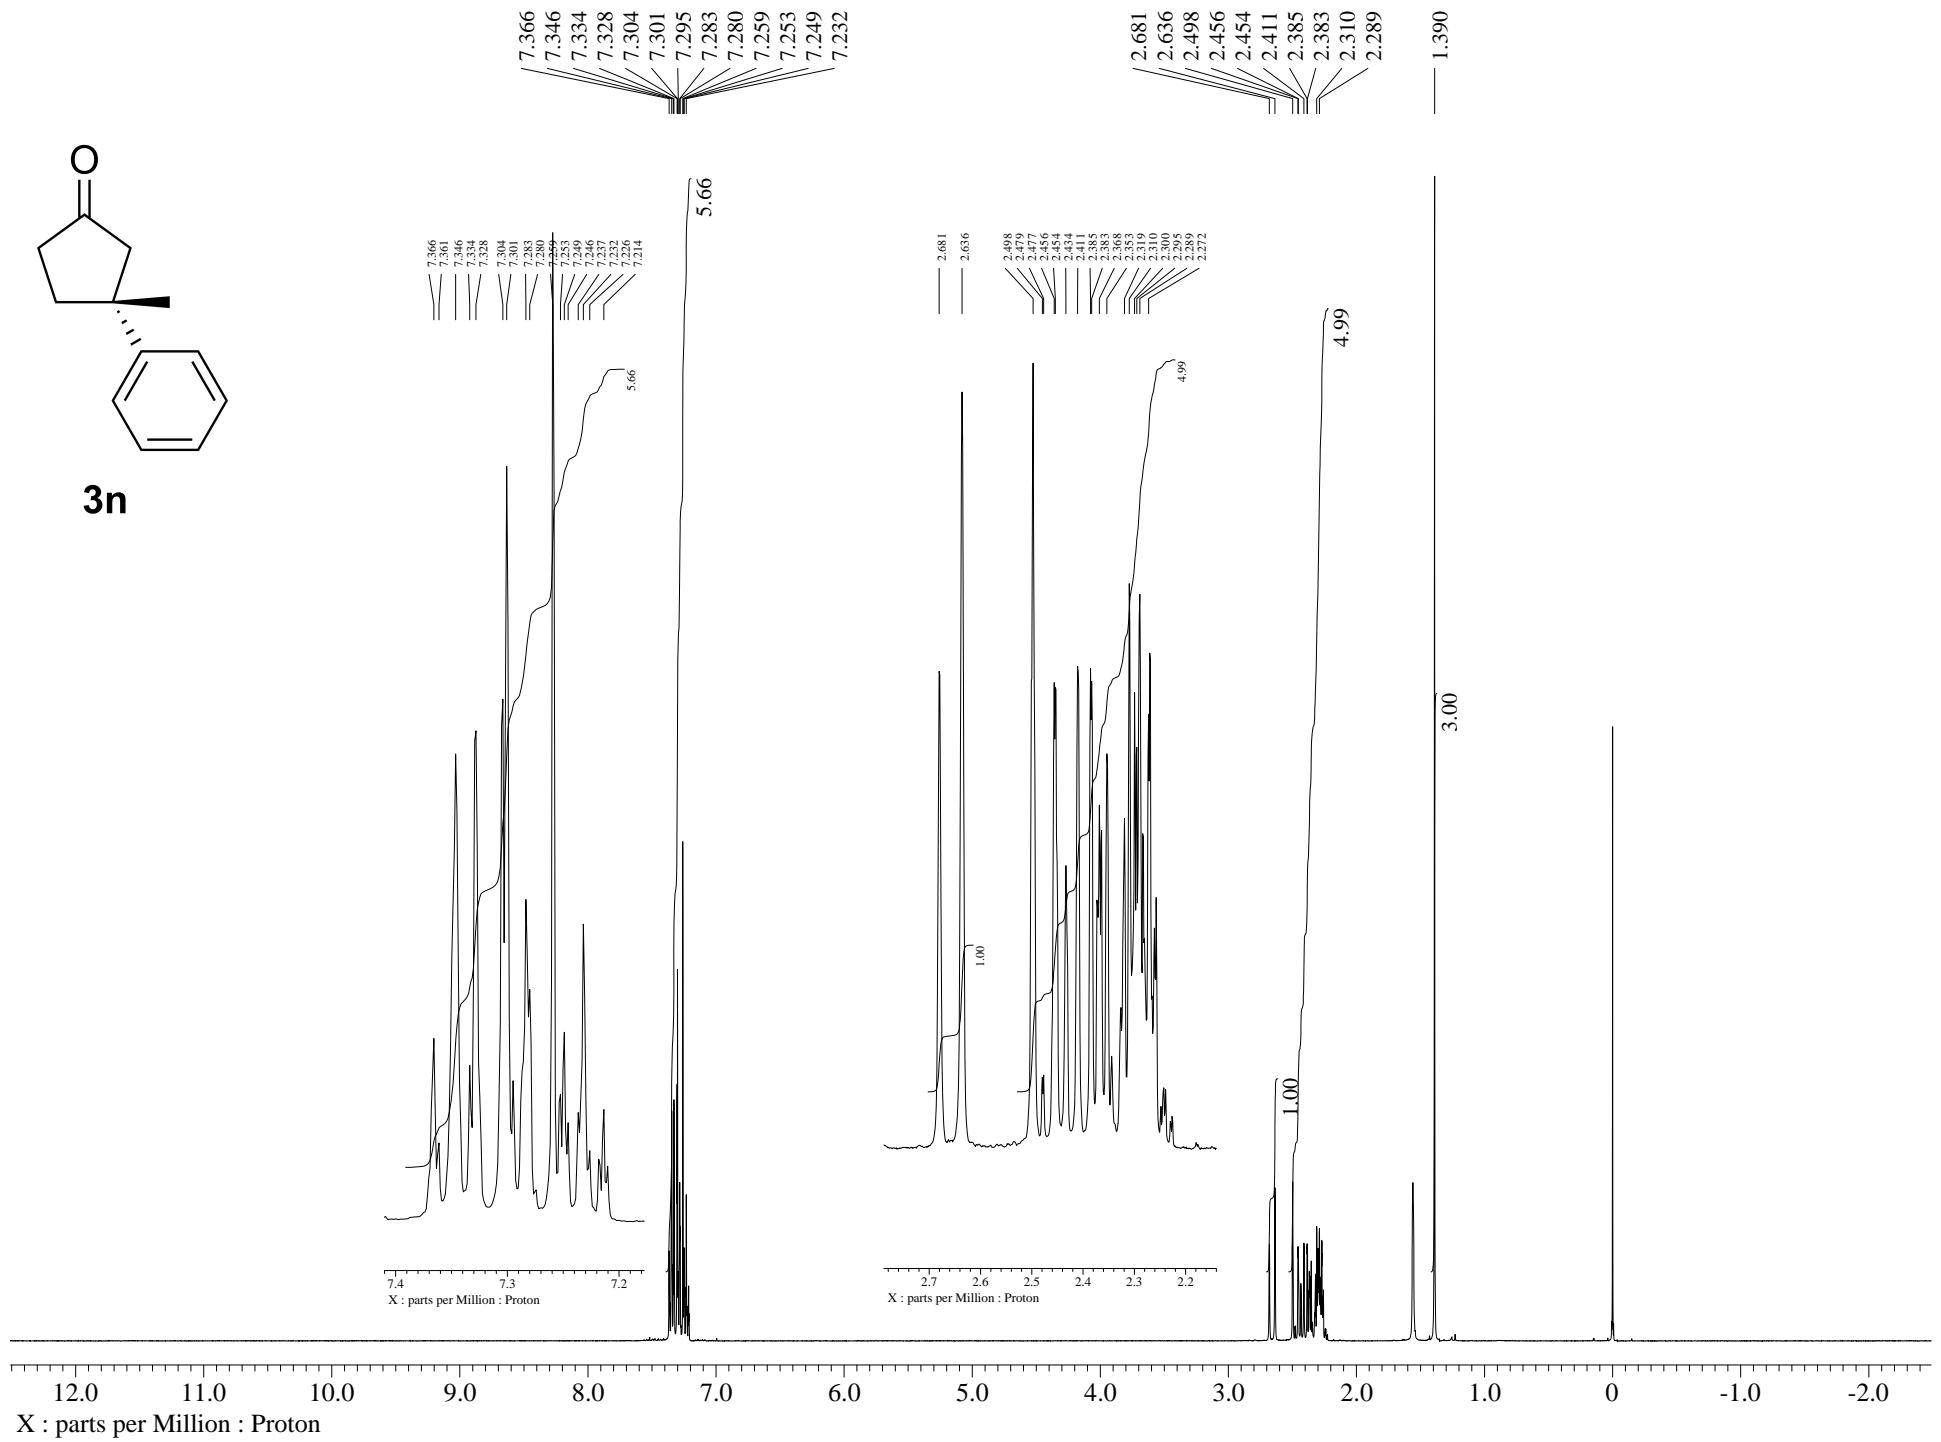

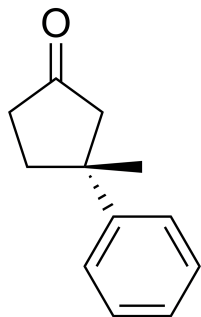

**3n**

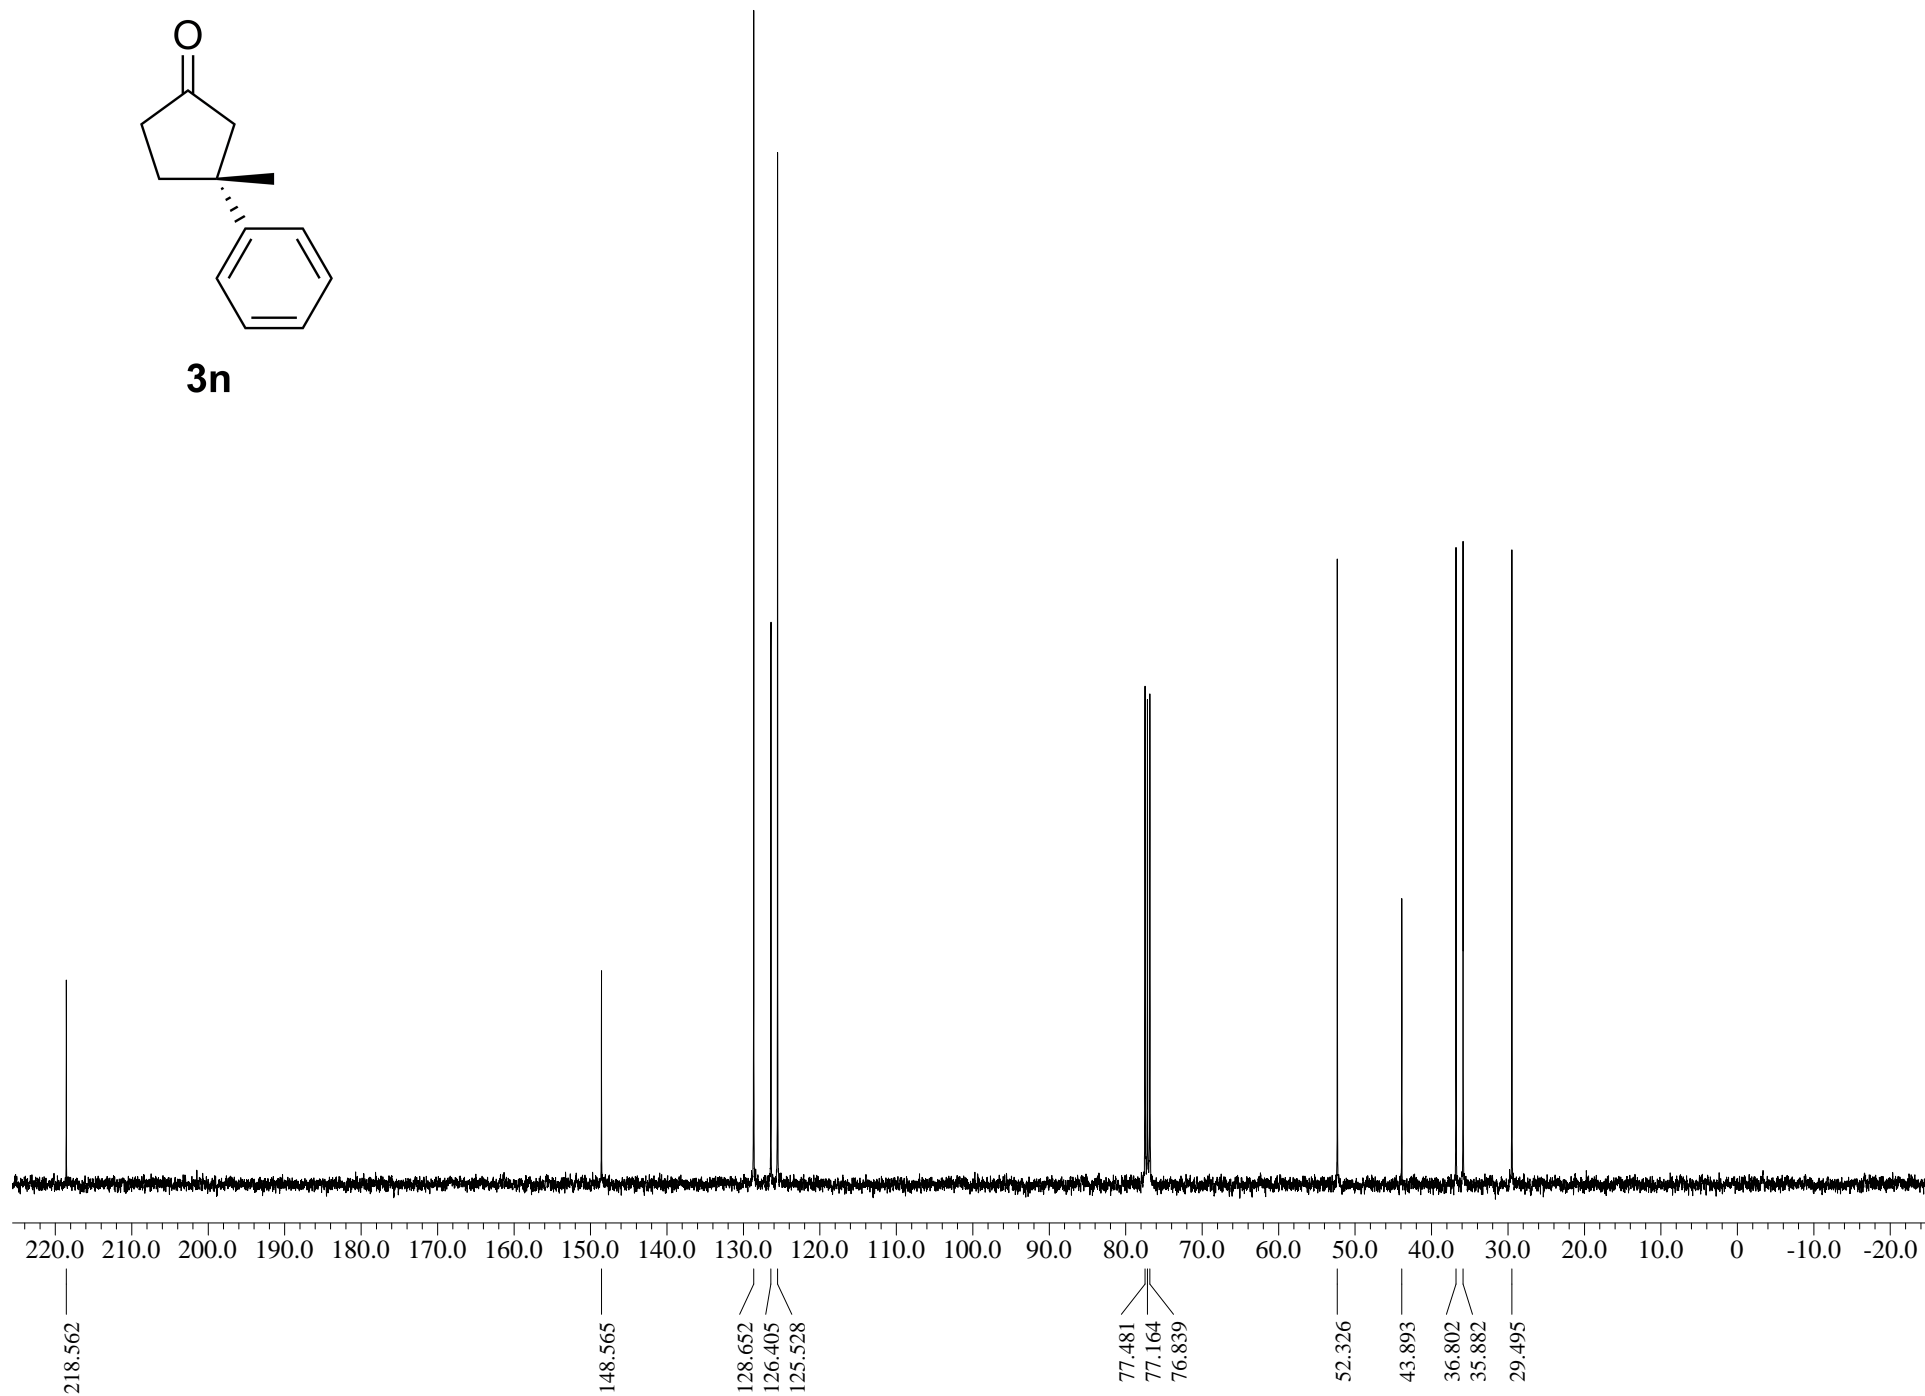

X : parts per Million : Carbon13

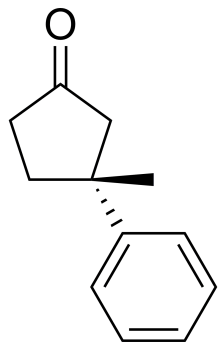

**3n**

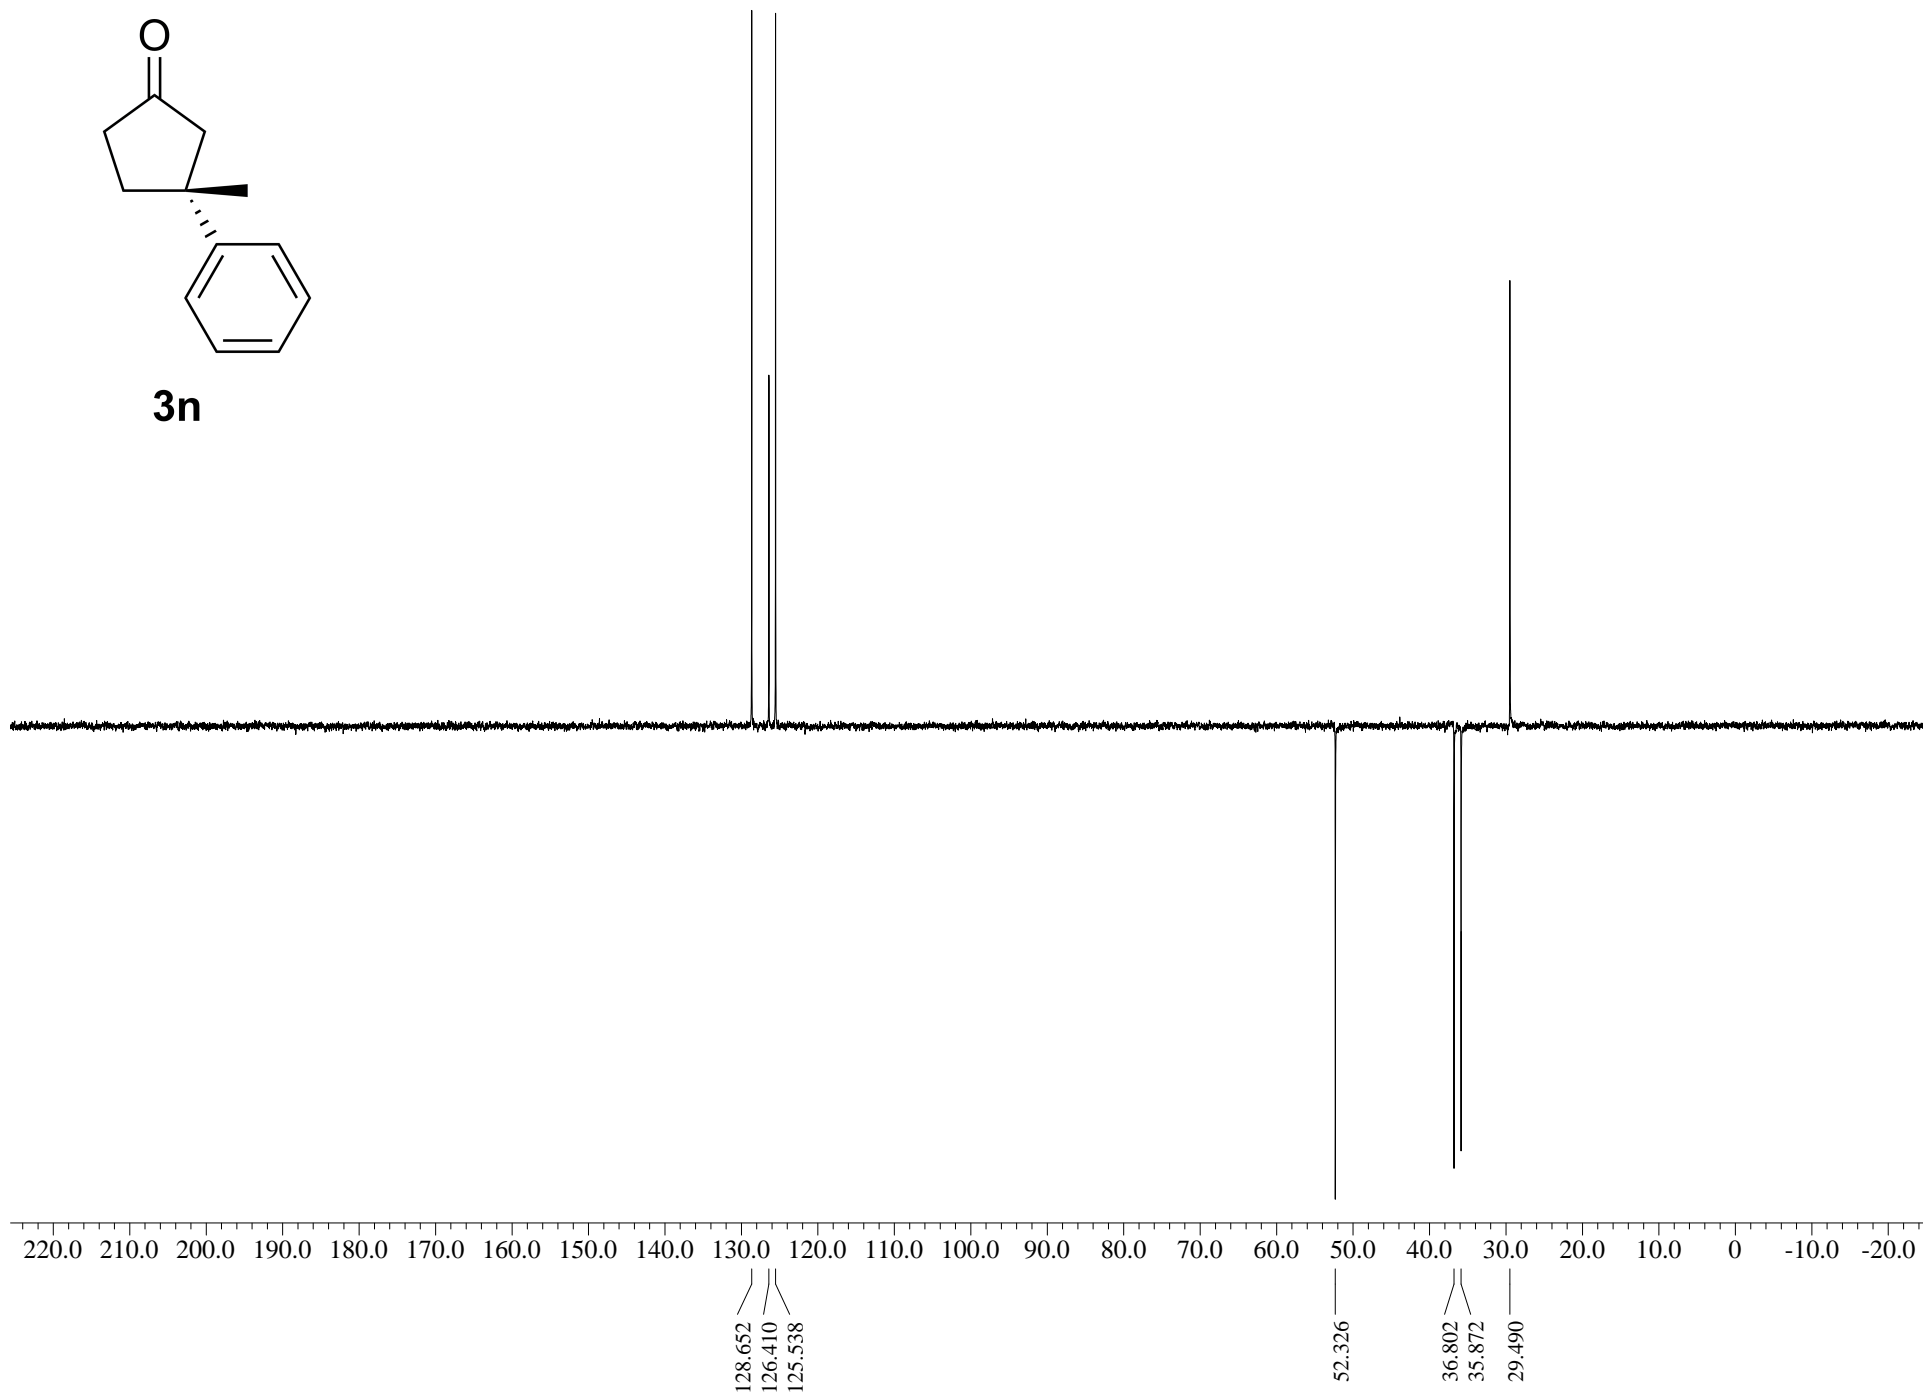



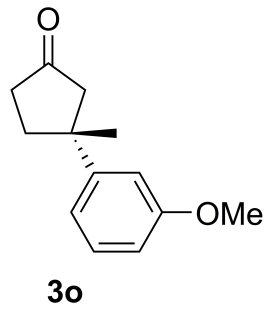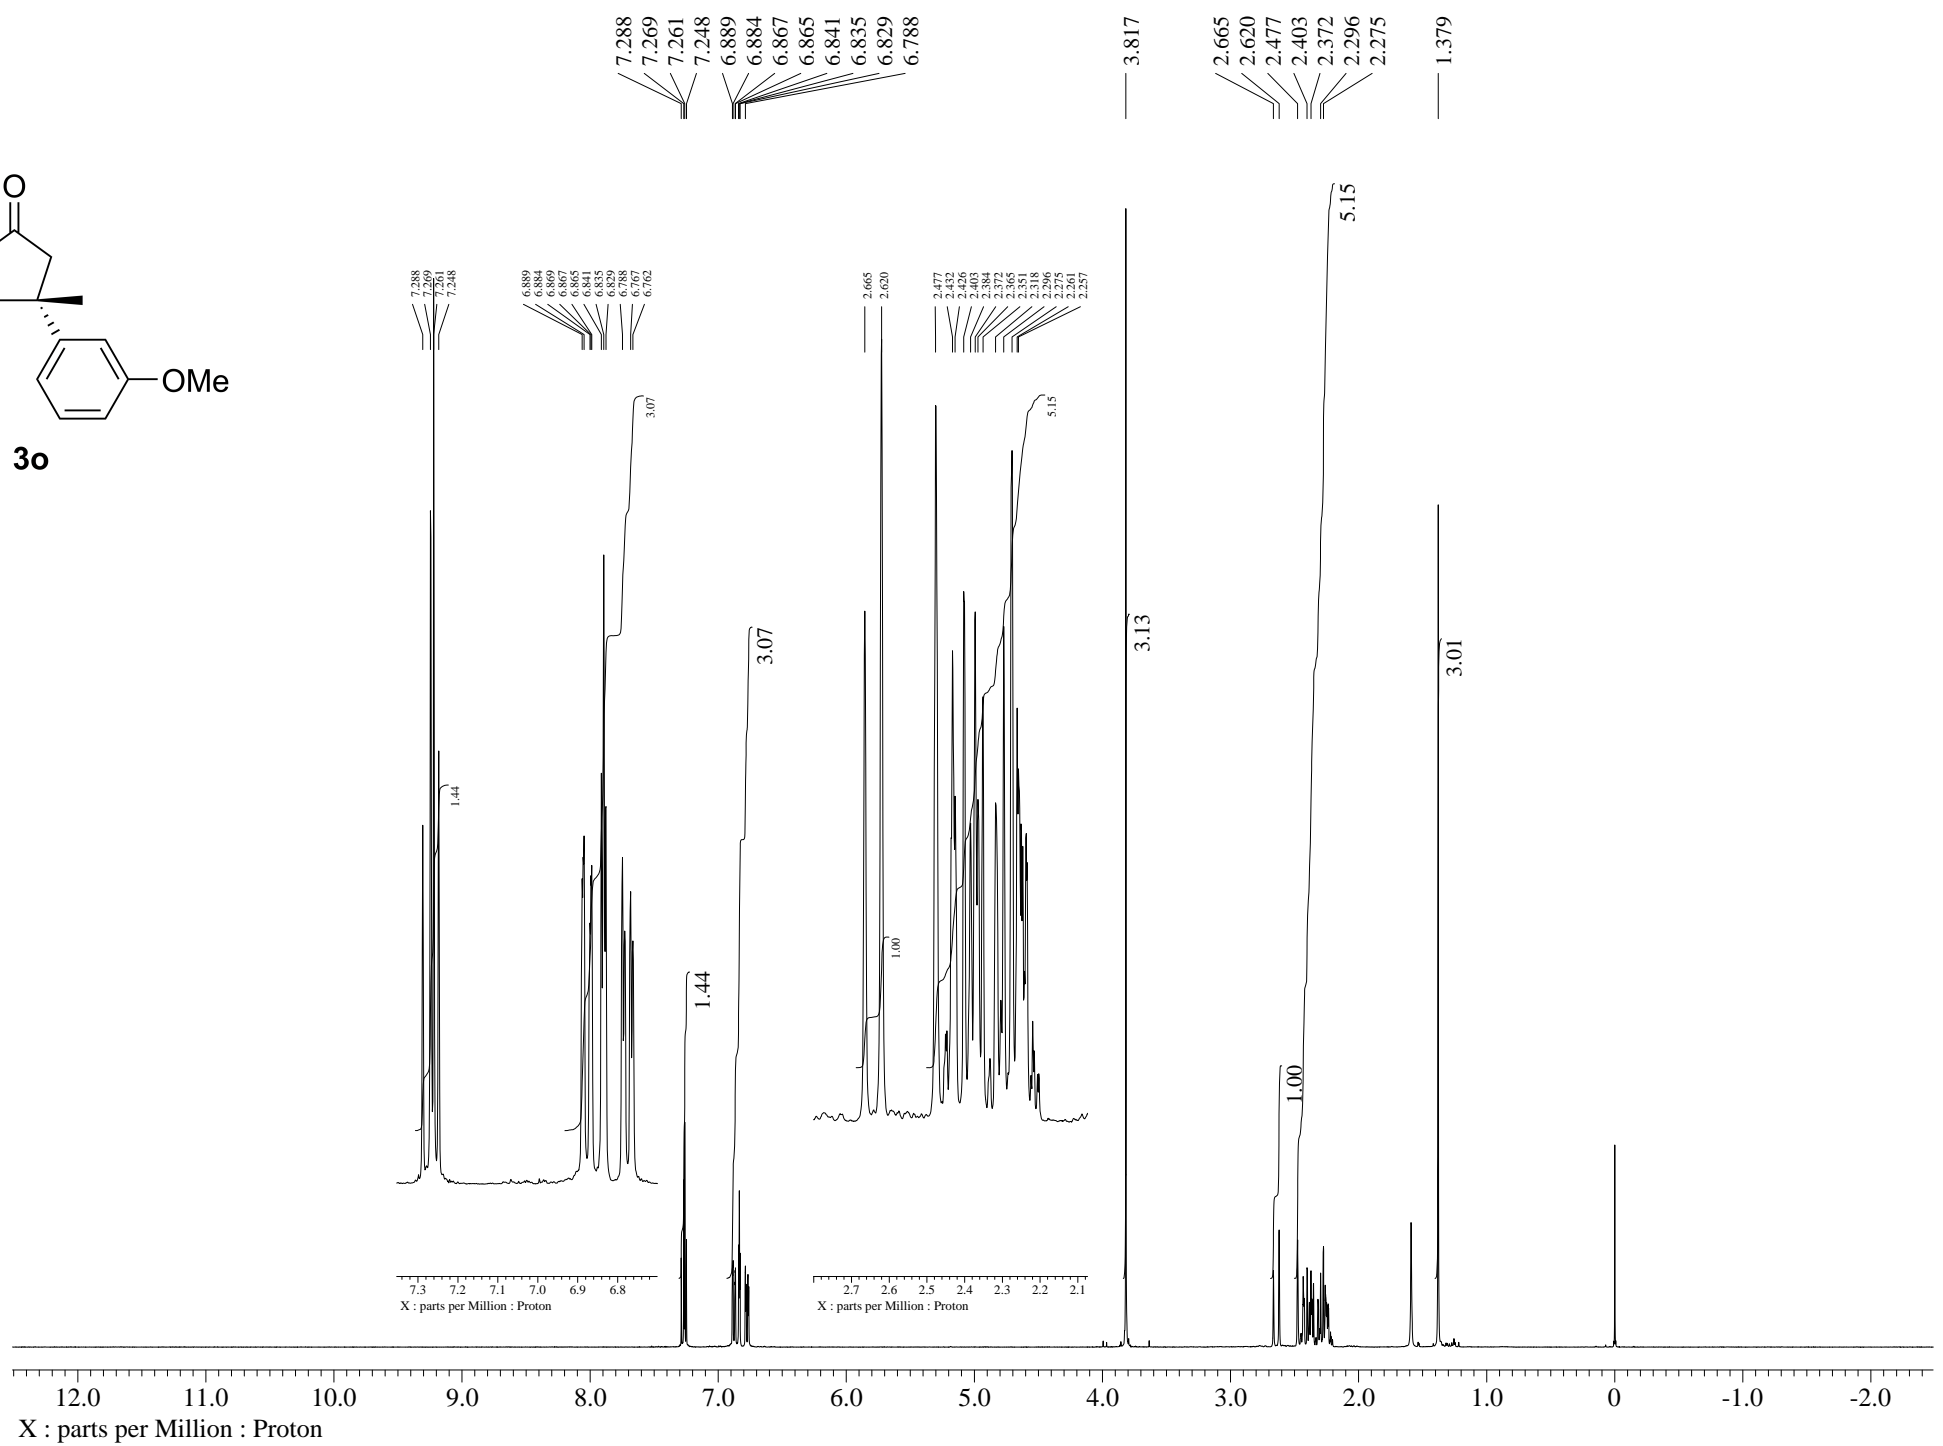

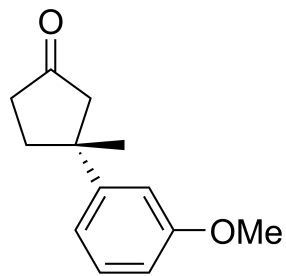

3o

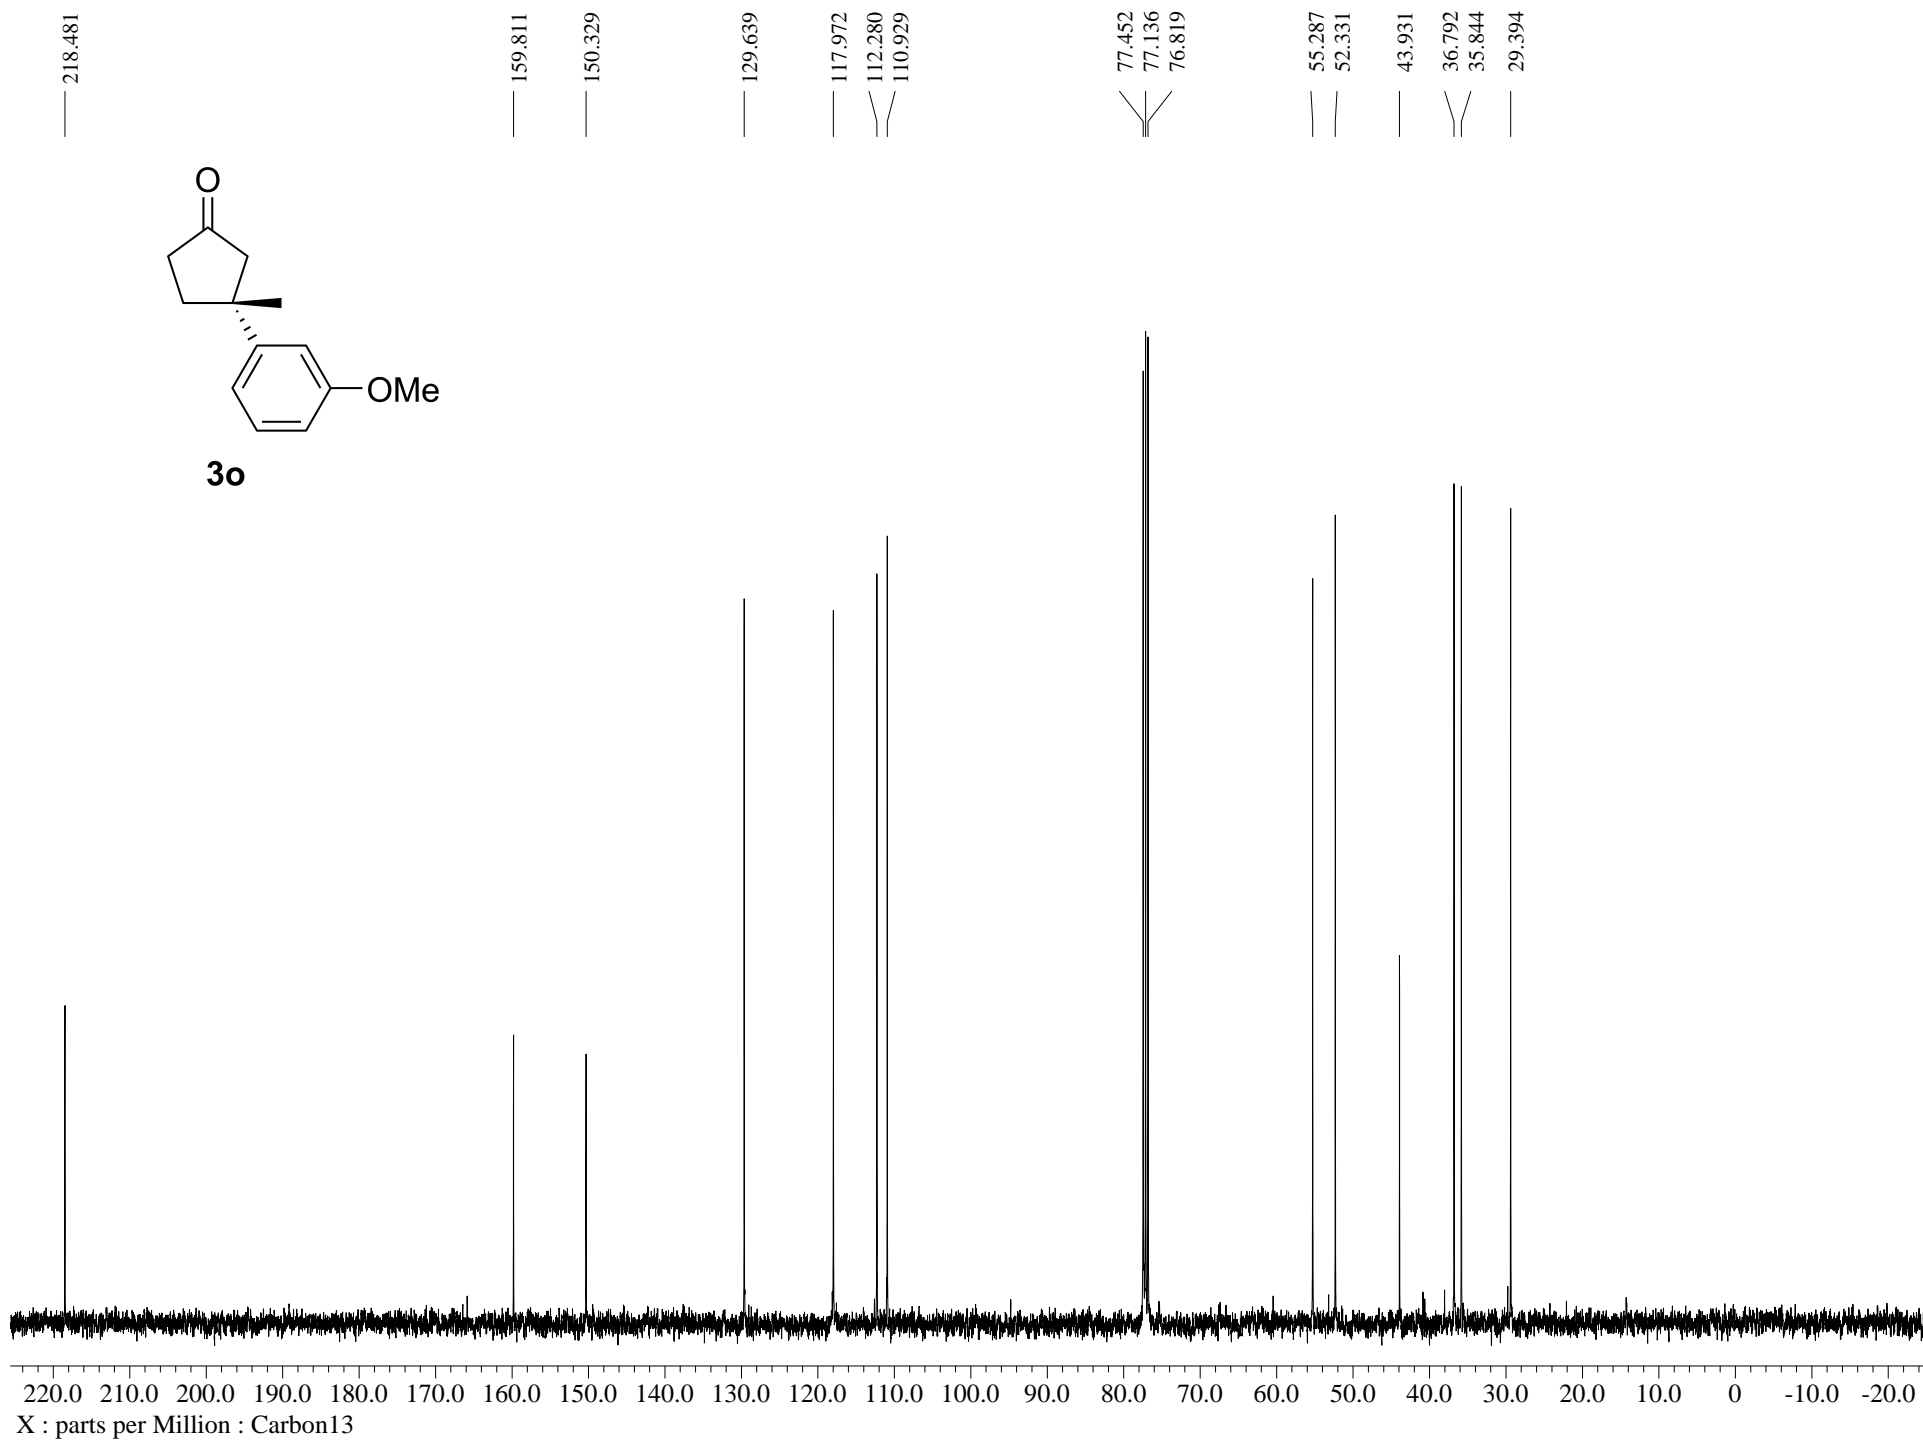

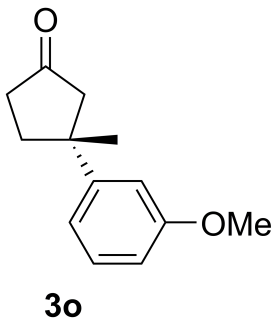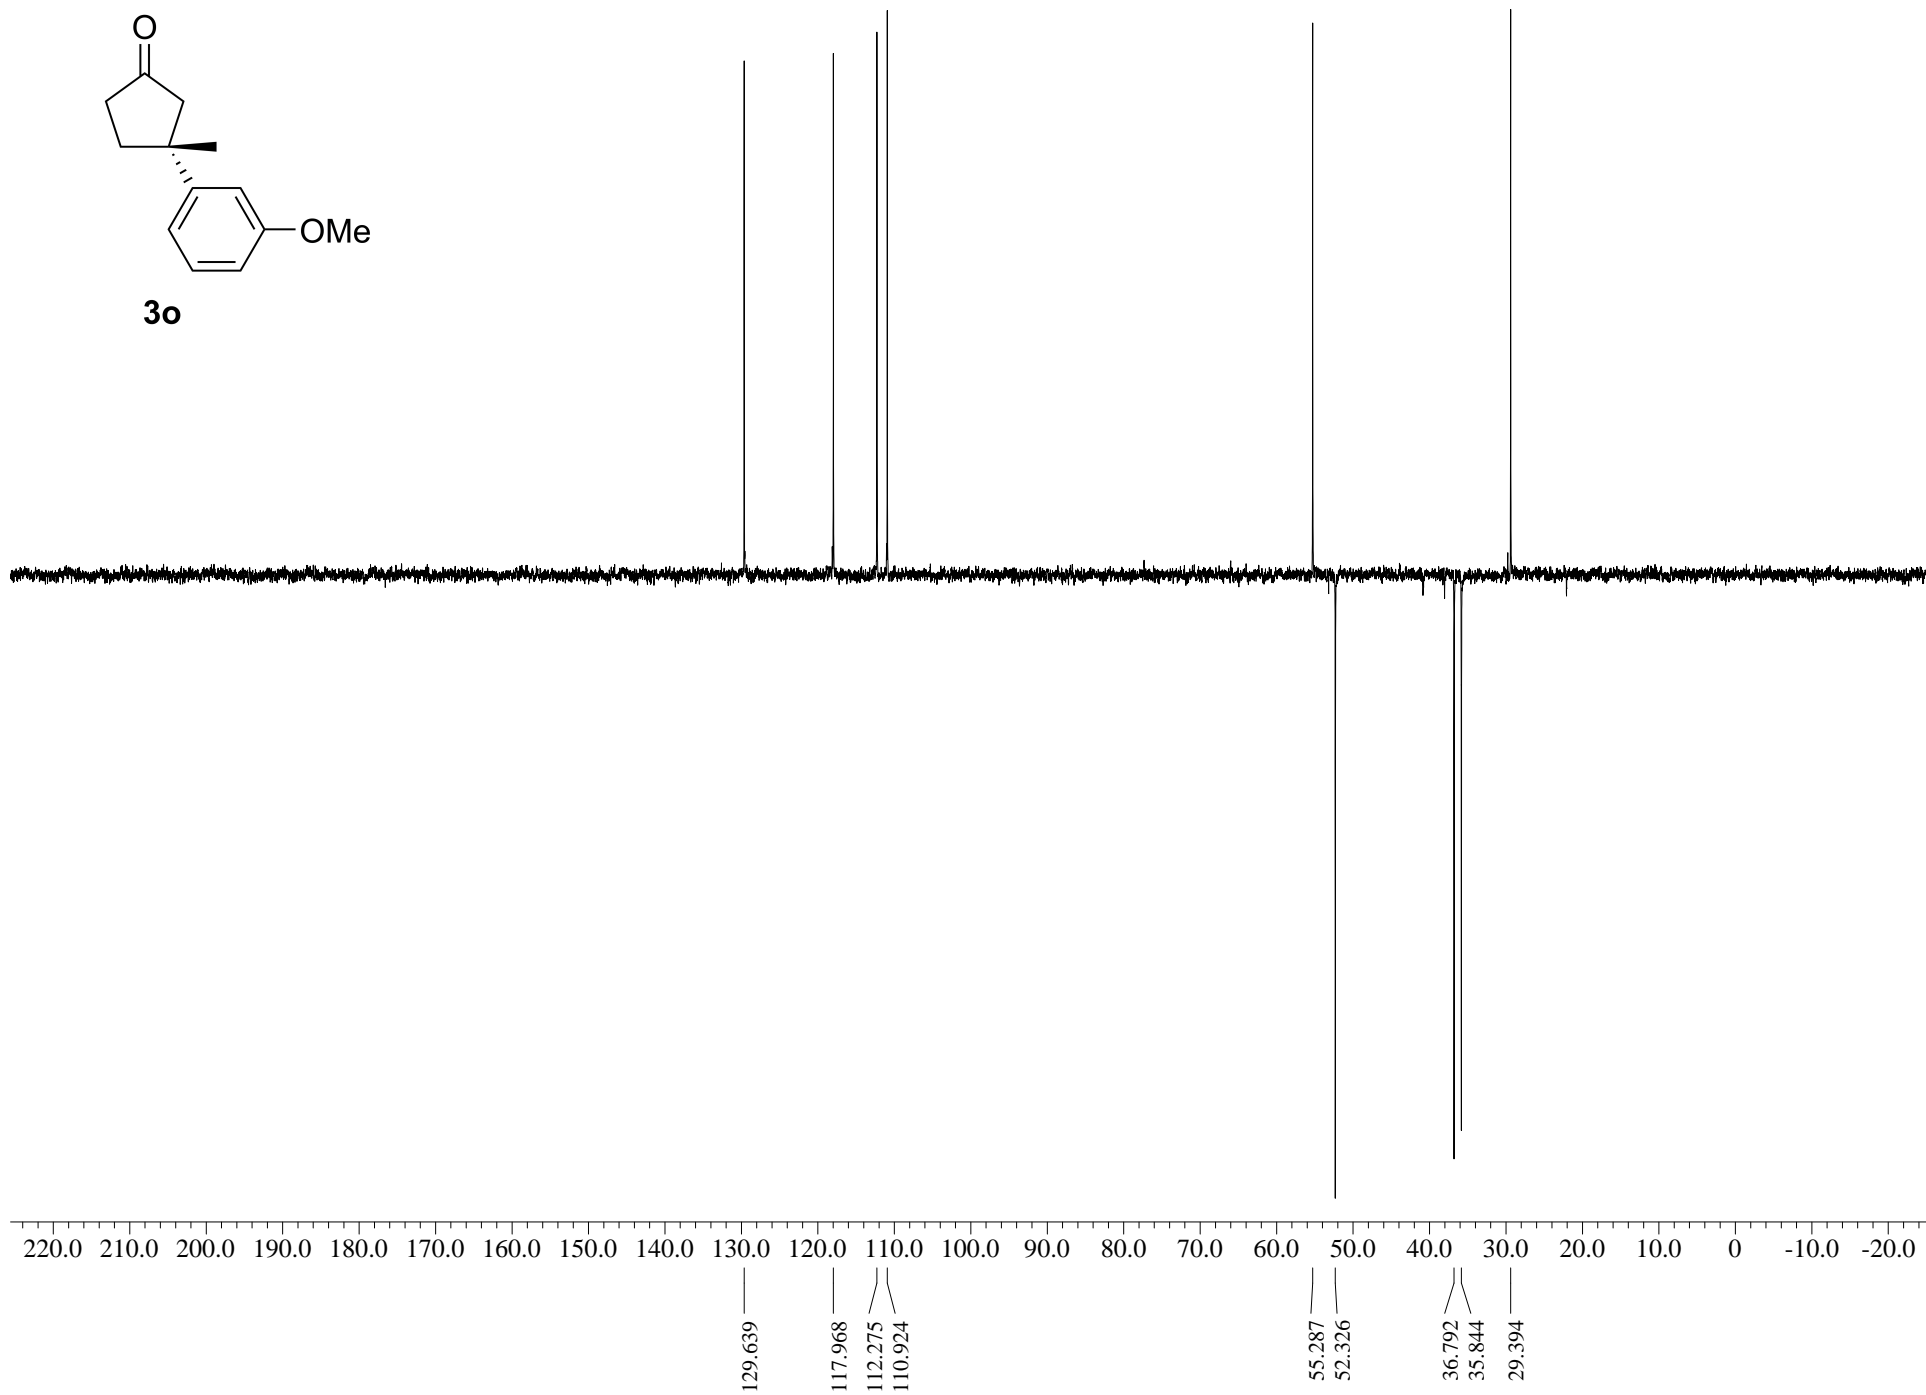

X : parts per Million : Carbon13

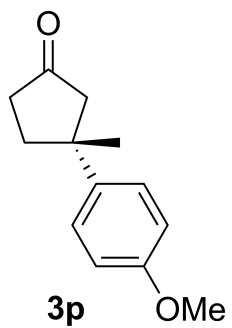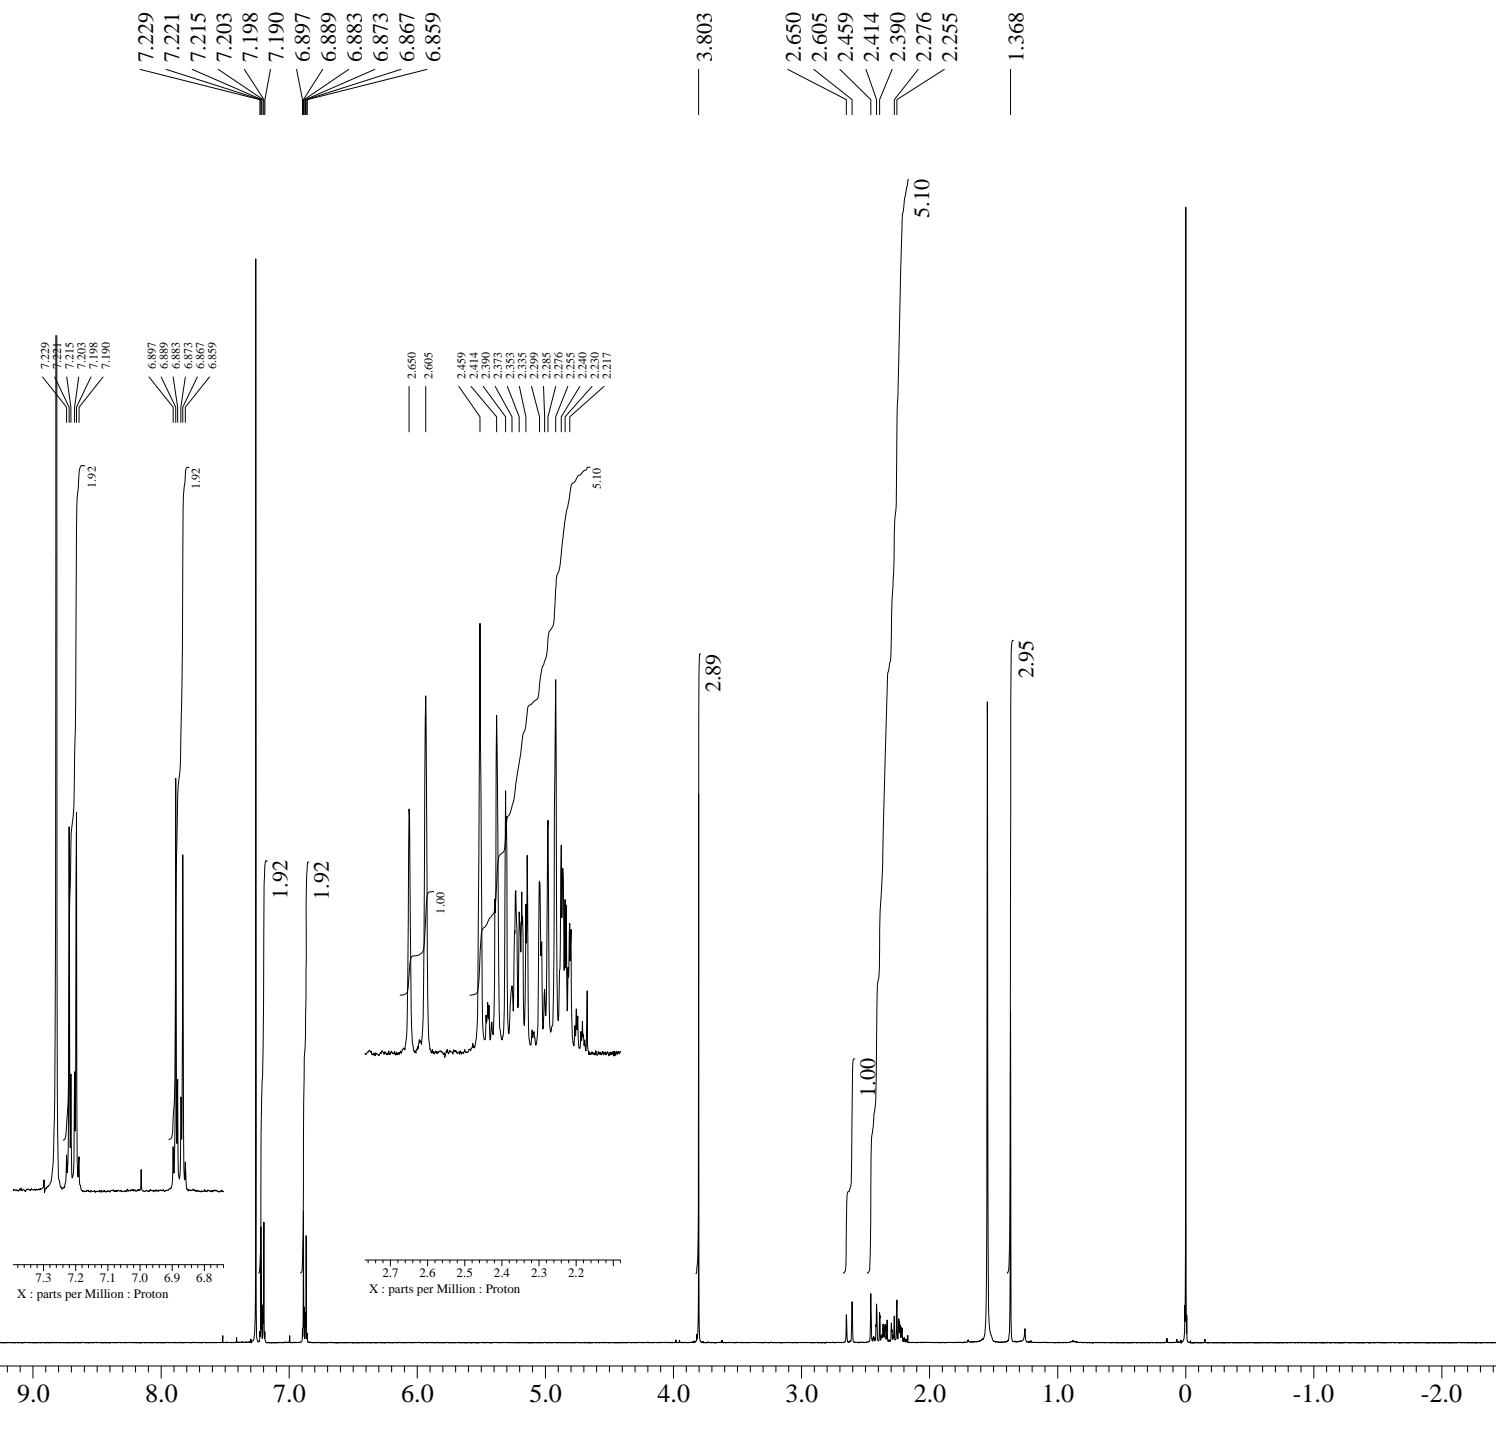

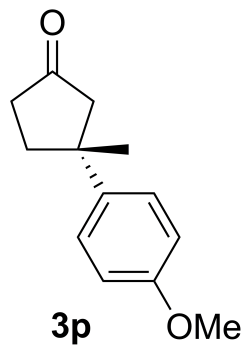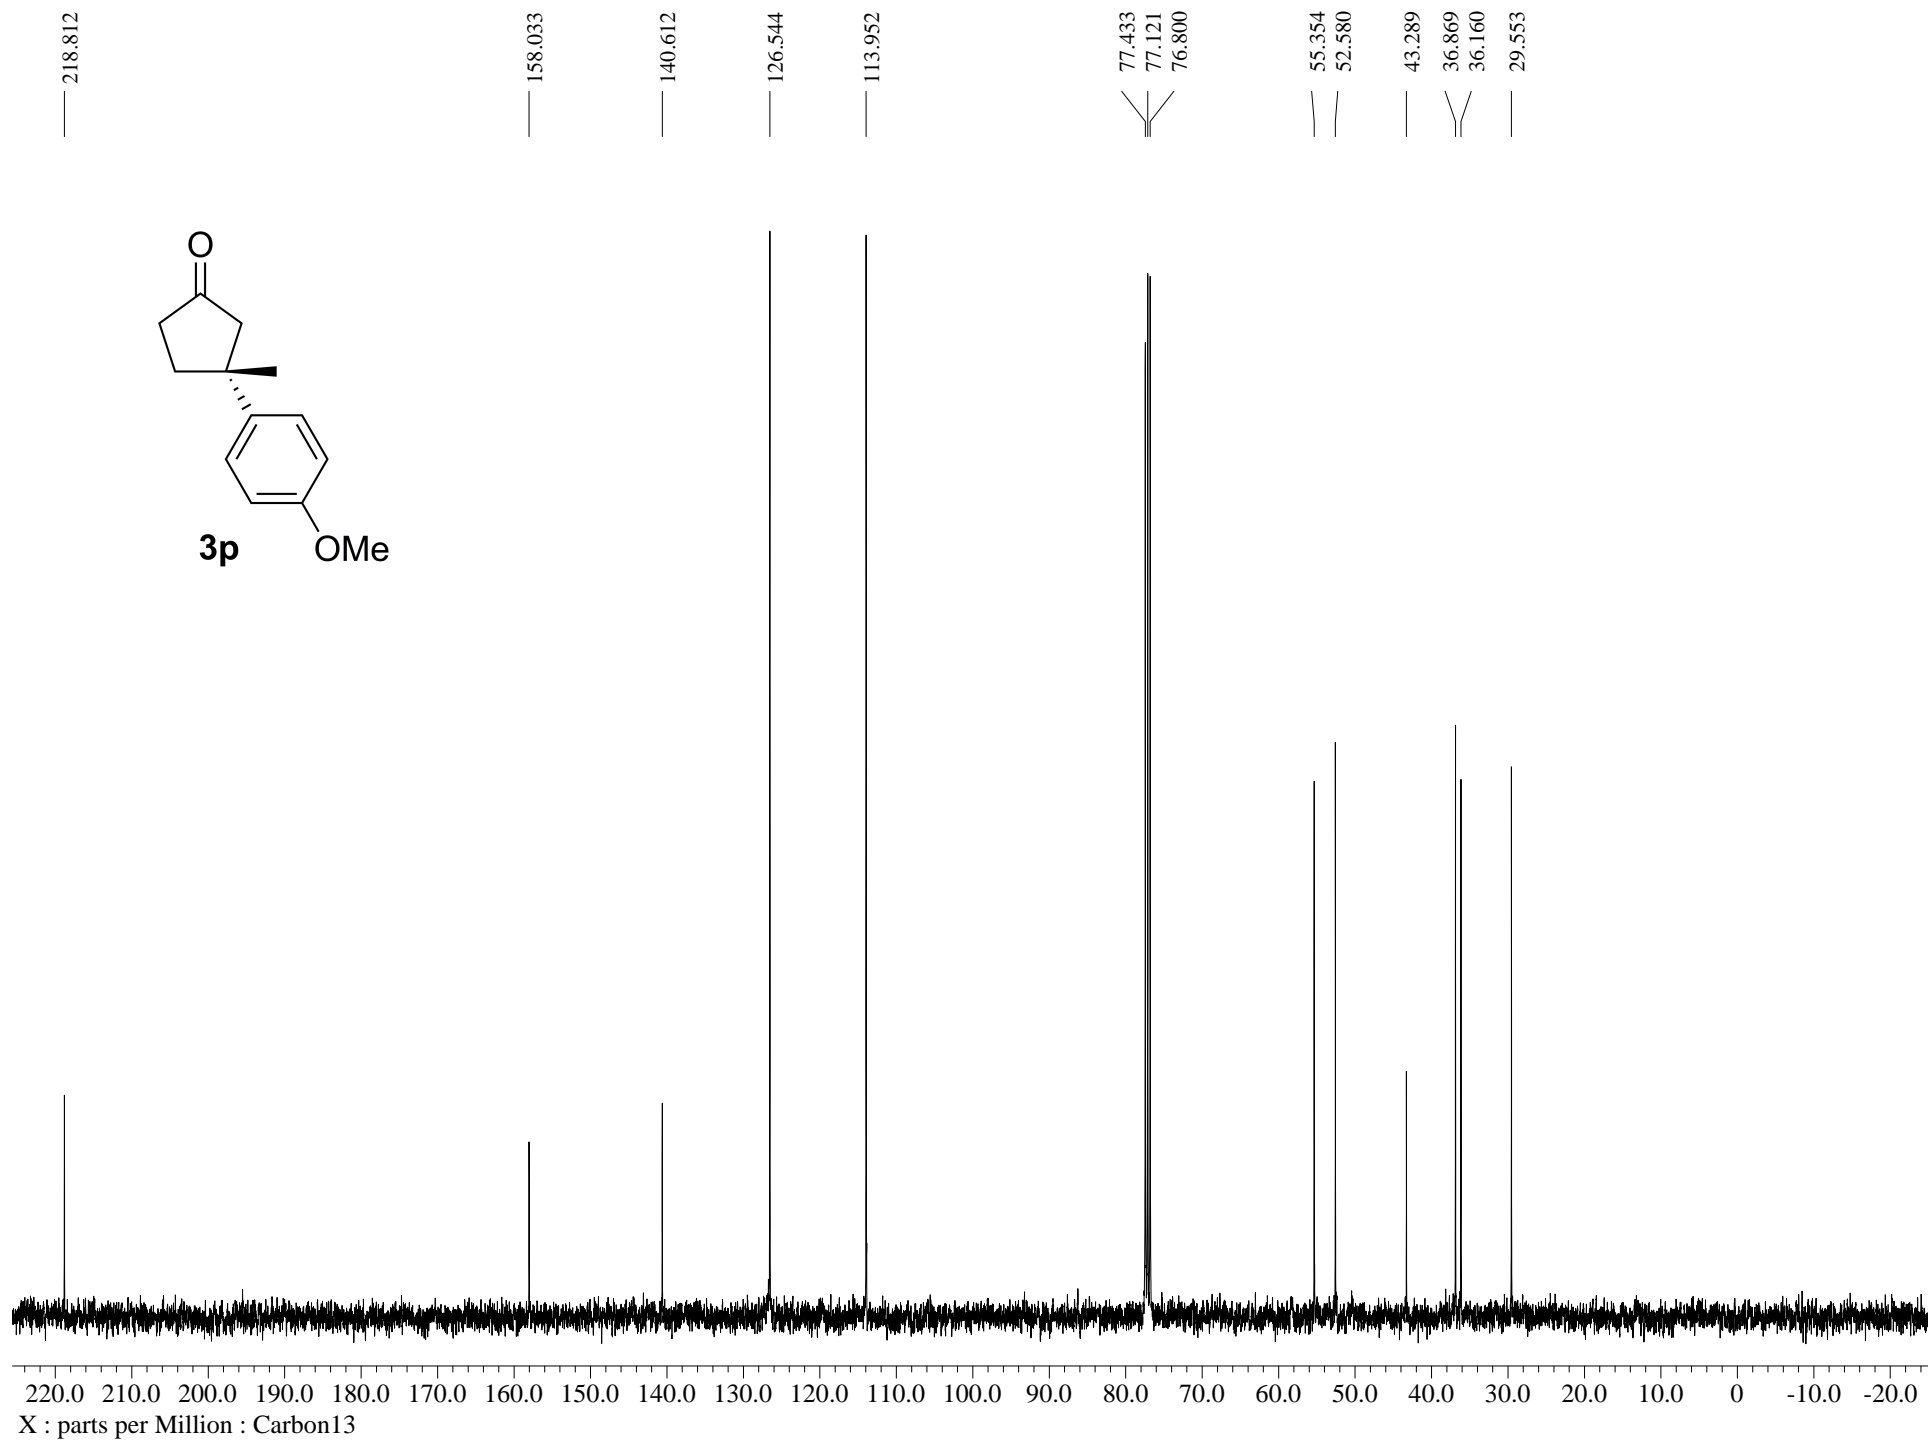

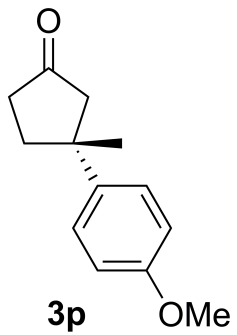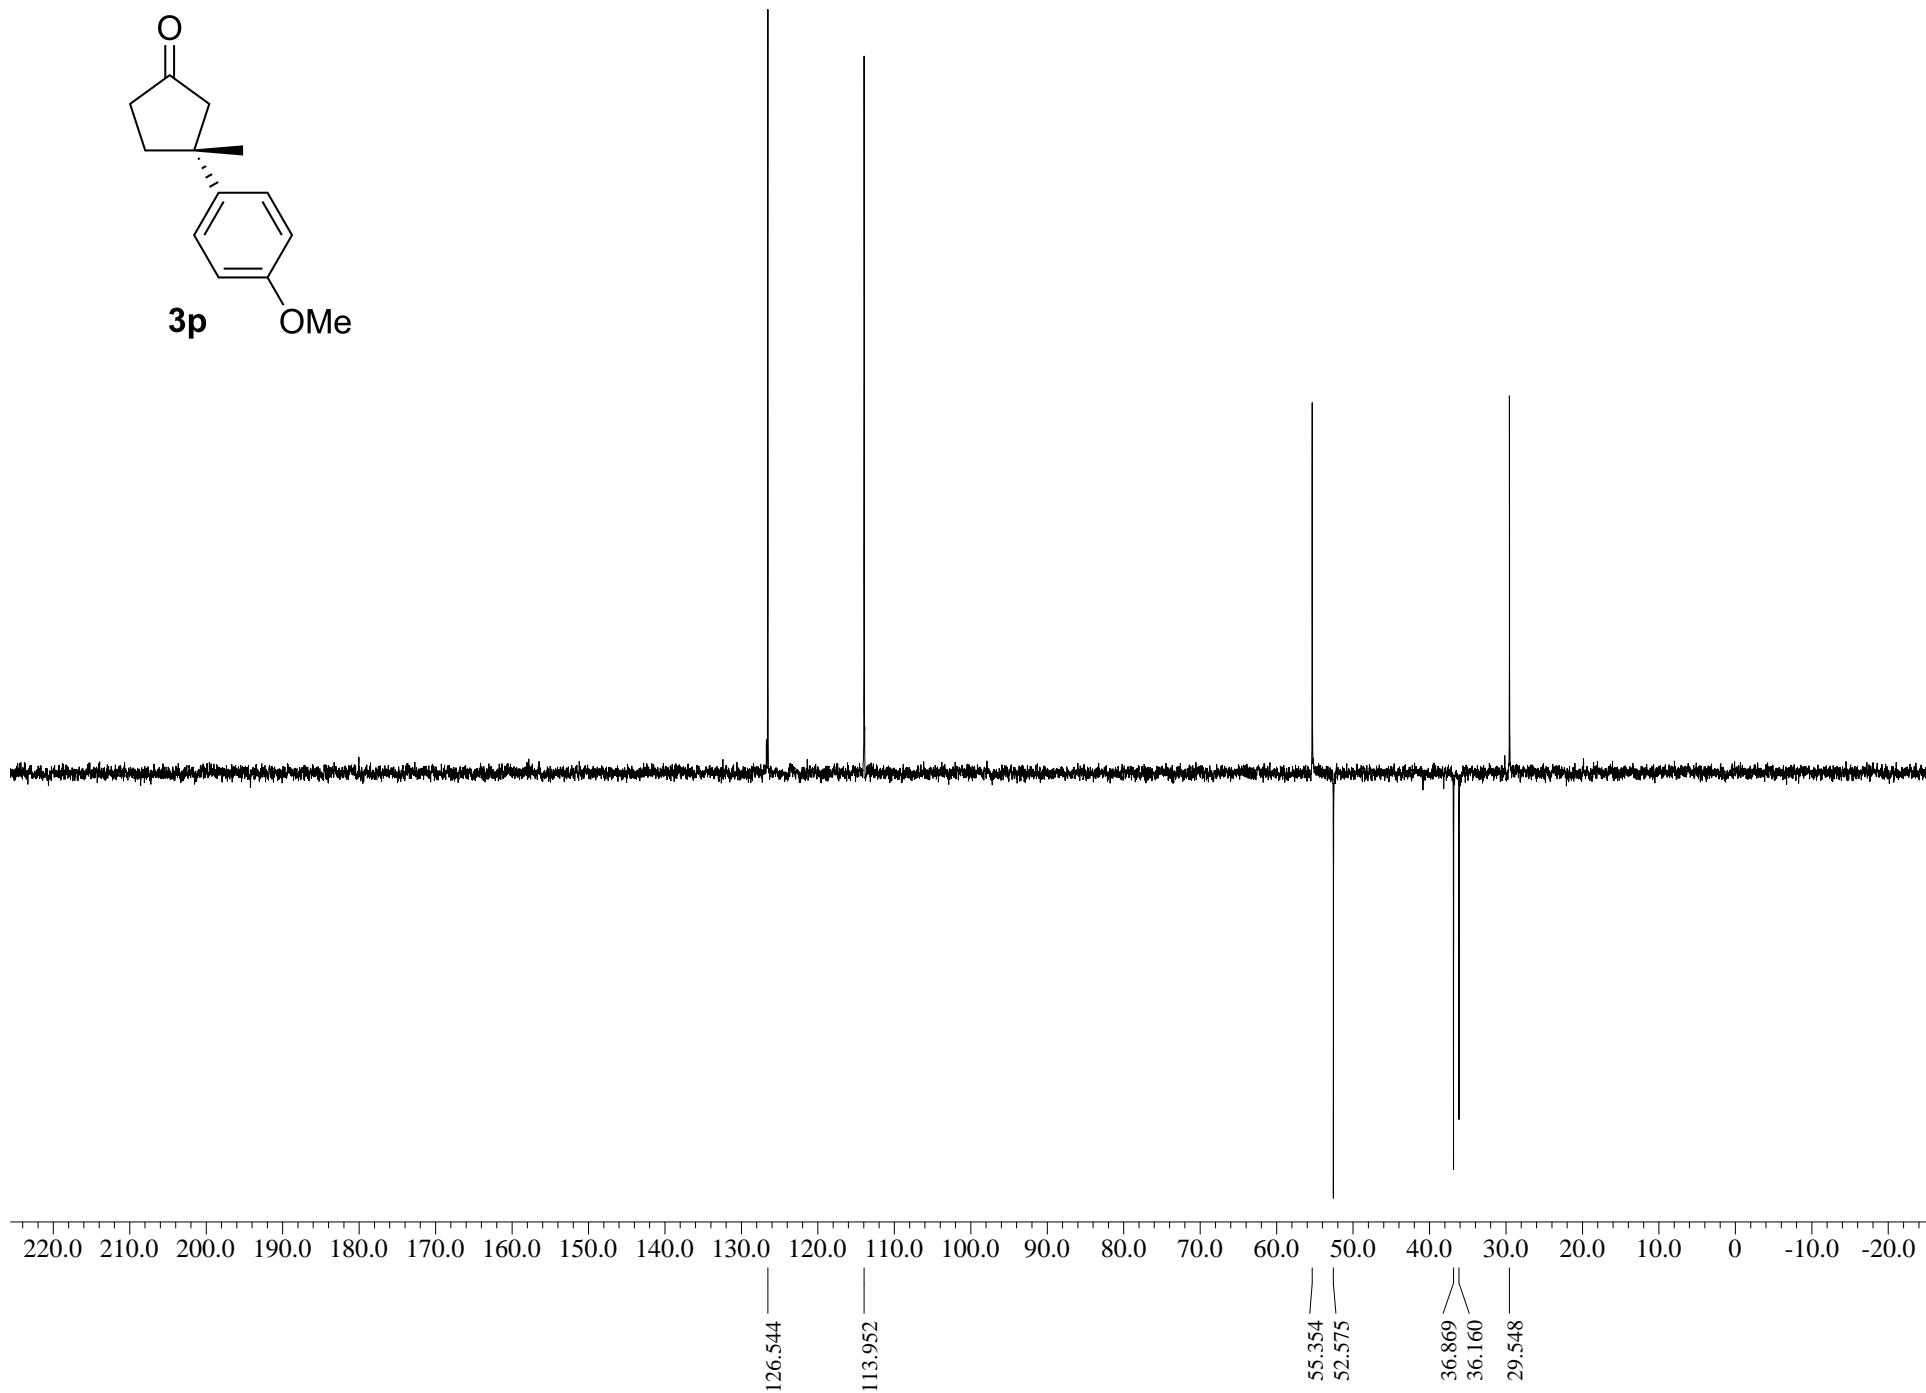

X : parts per Million : Carbon13

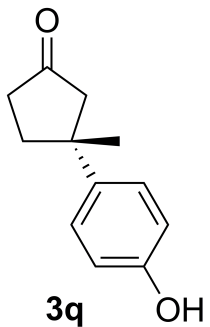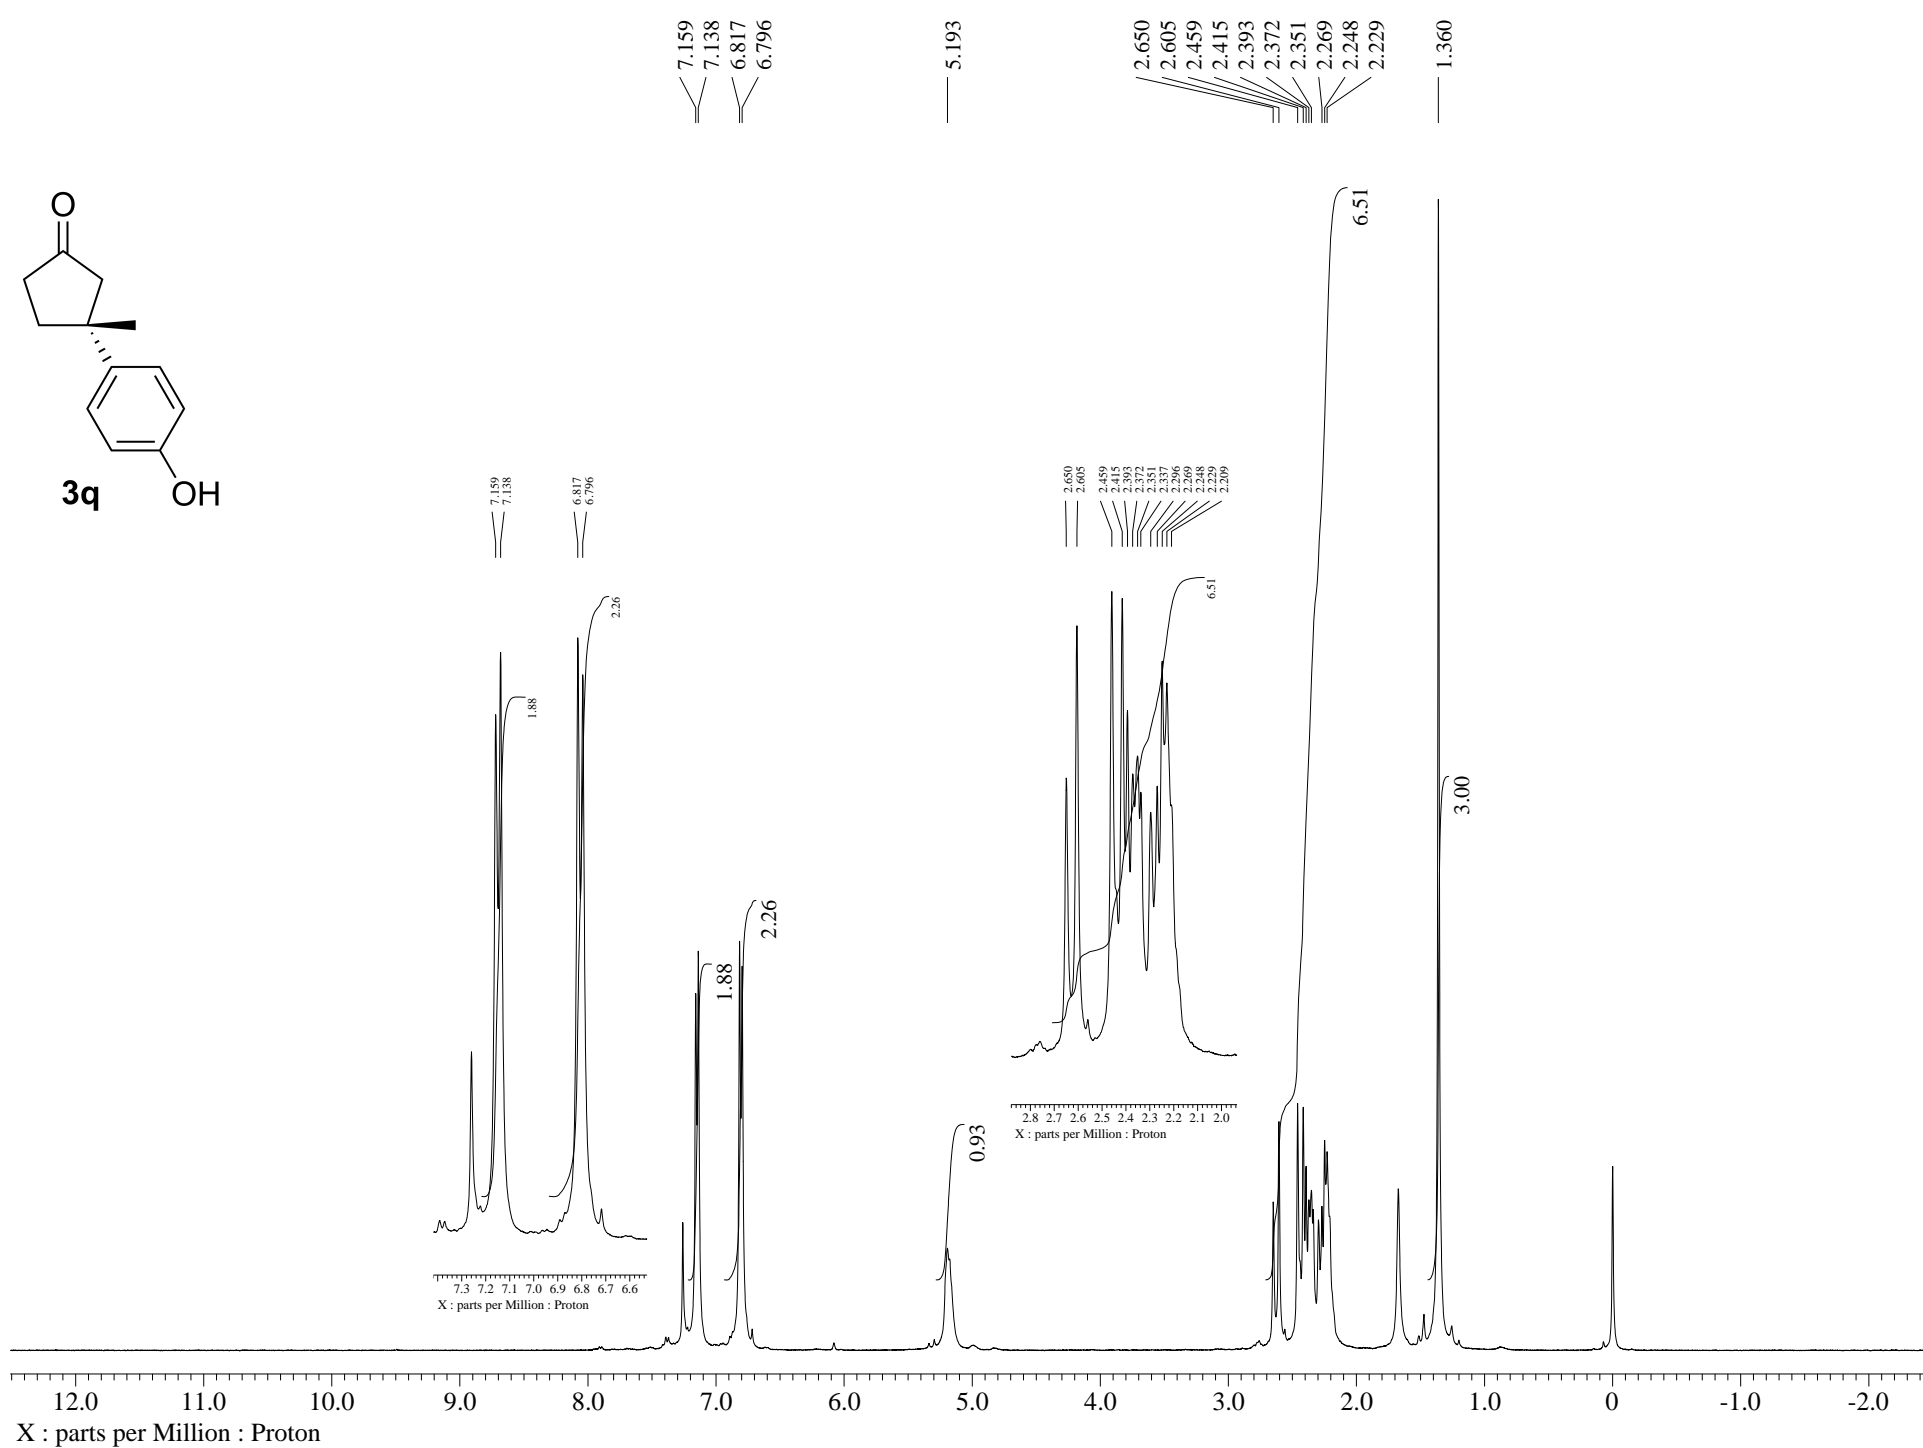

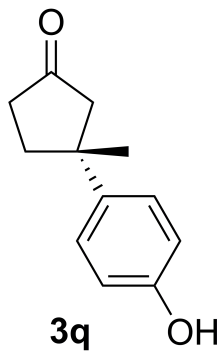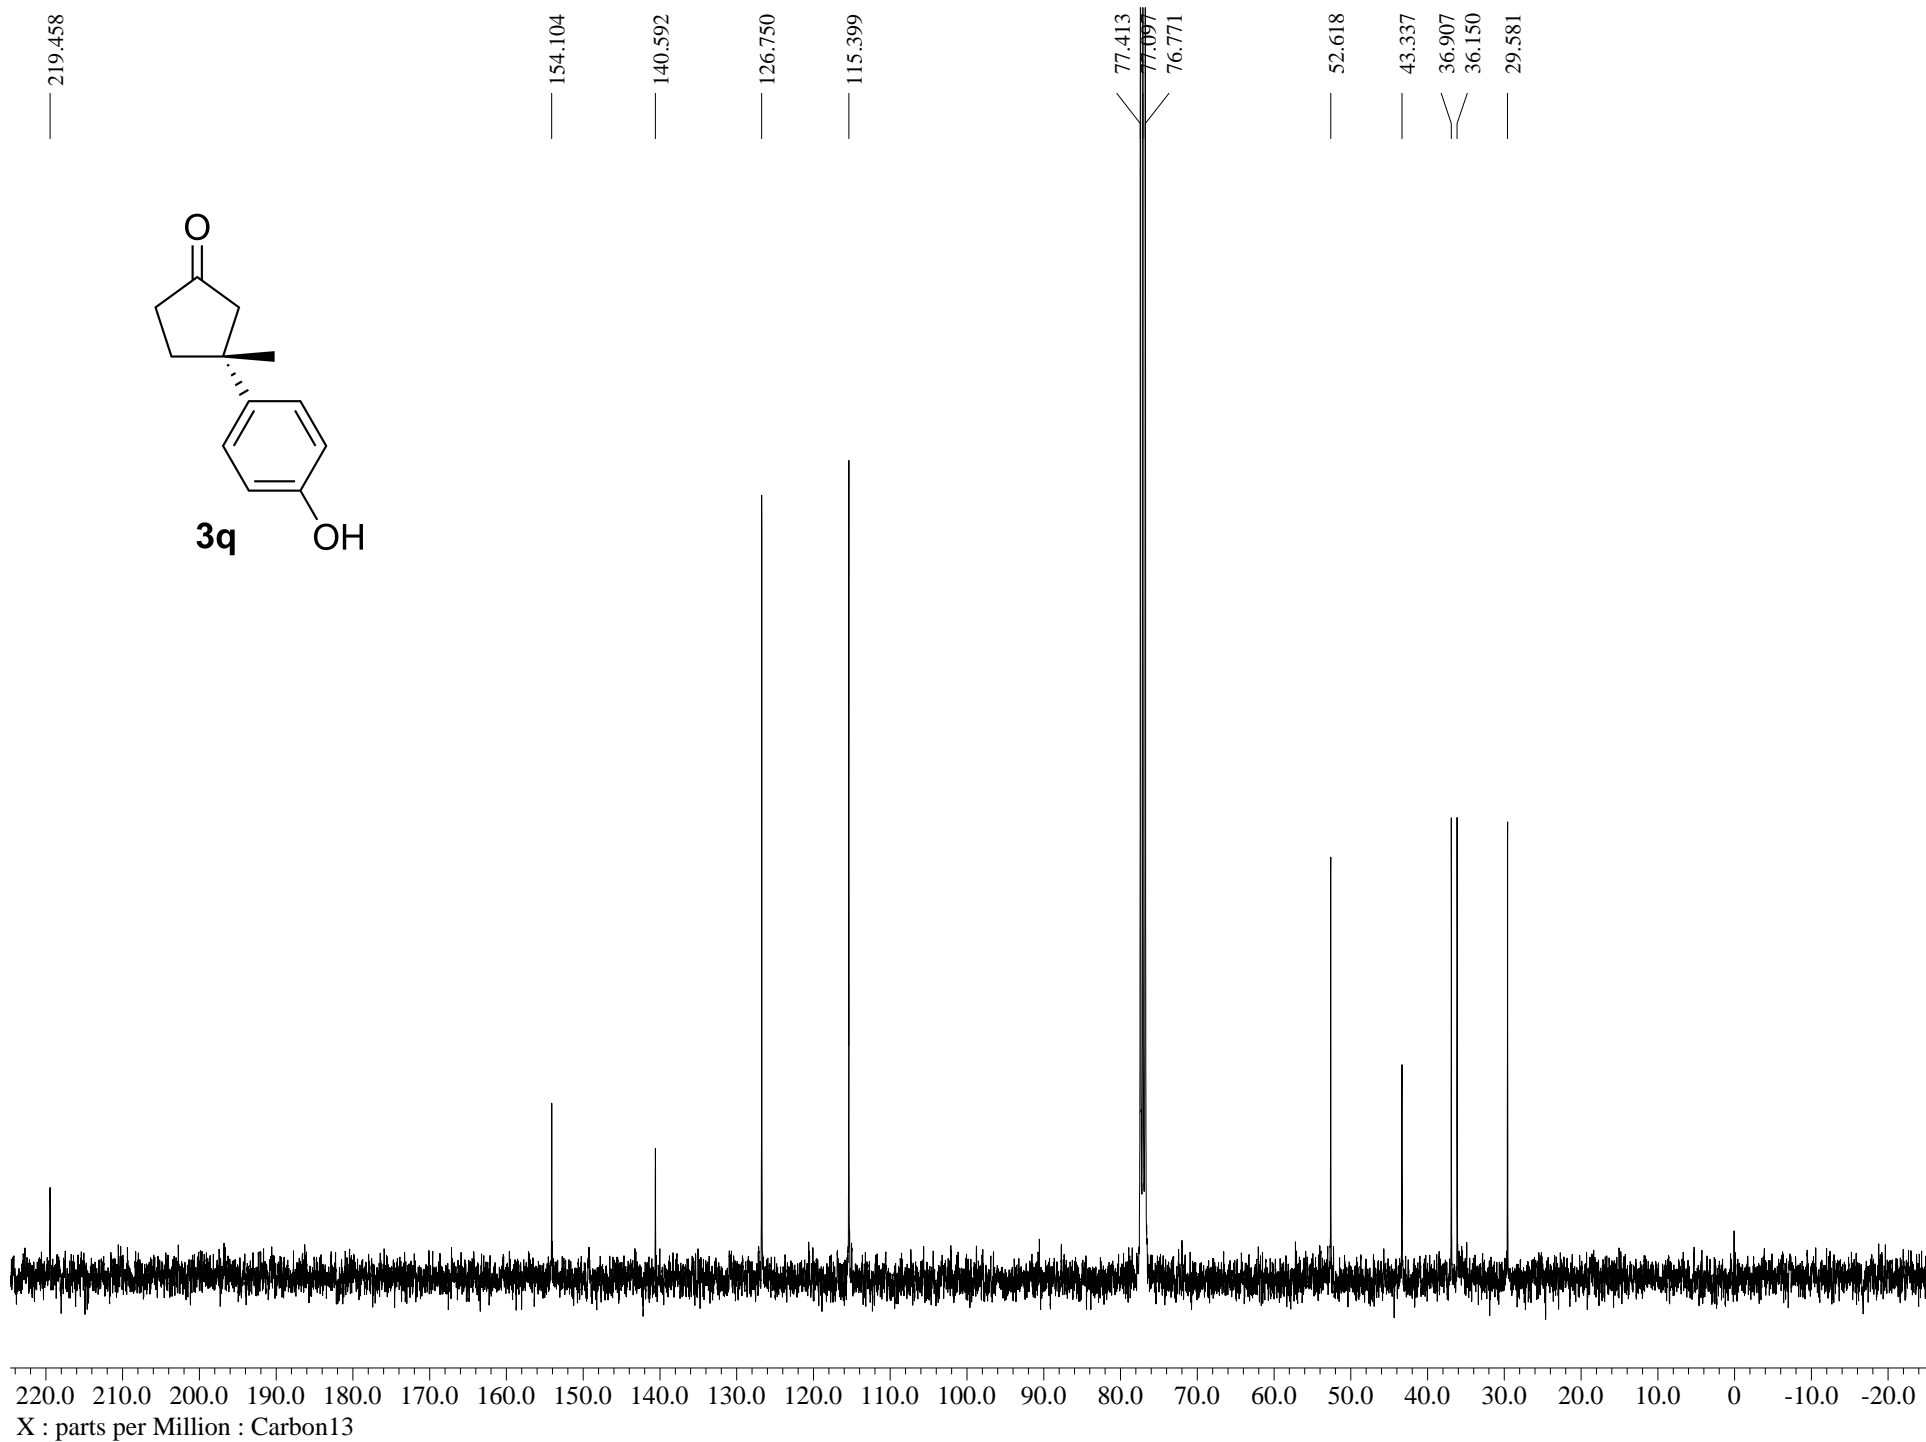



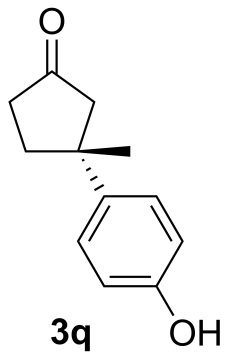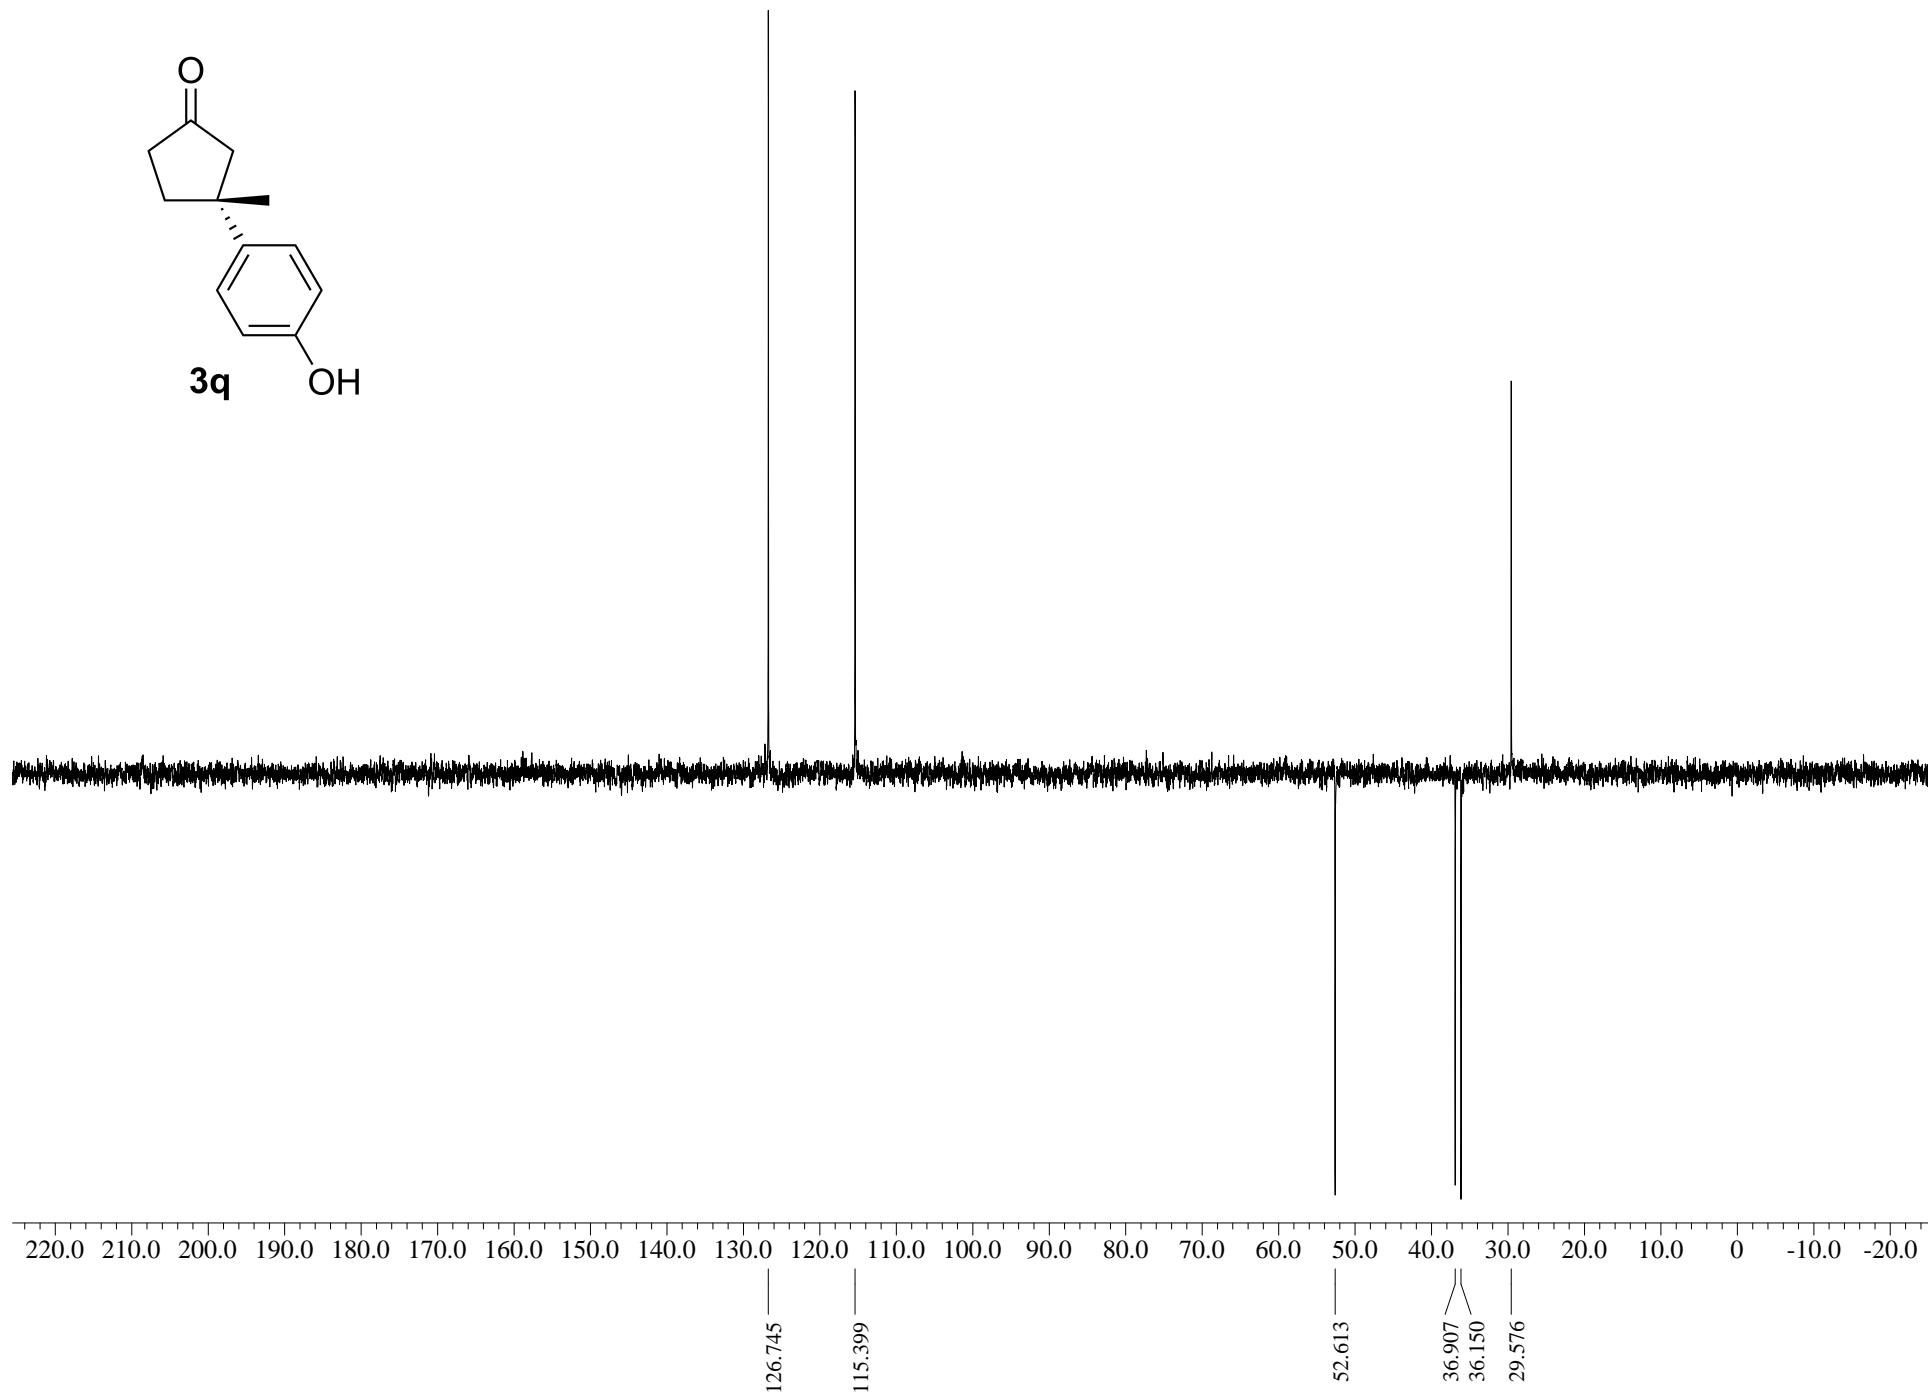

X : parts per Million : Carbon13

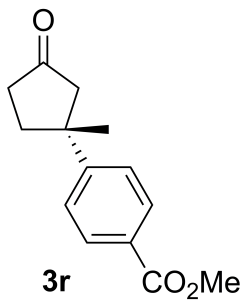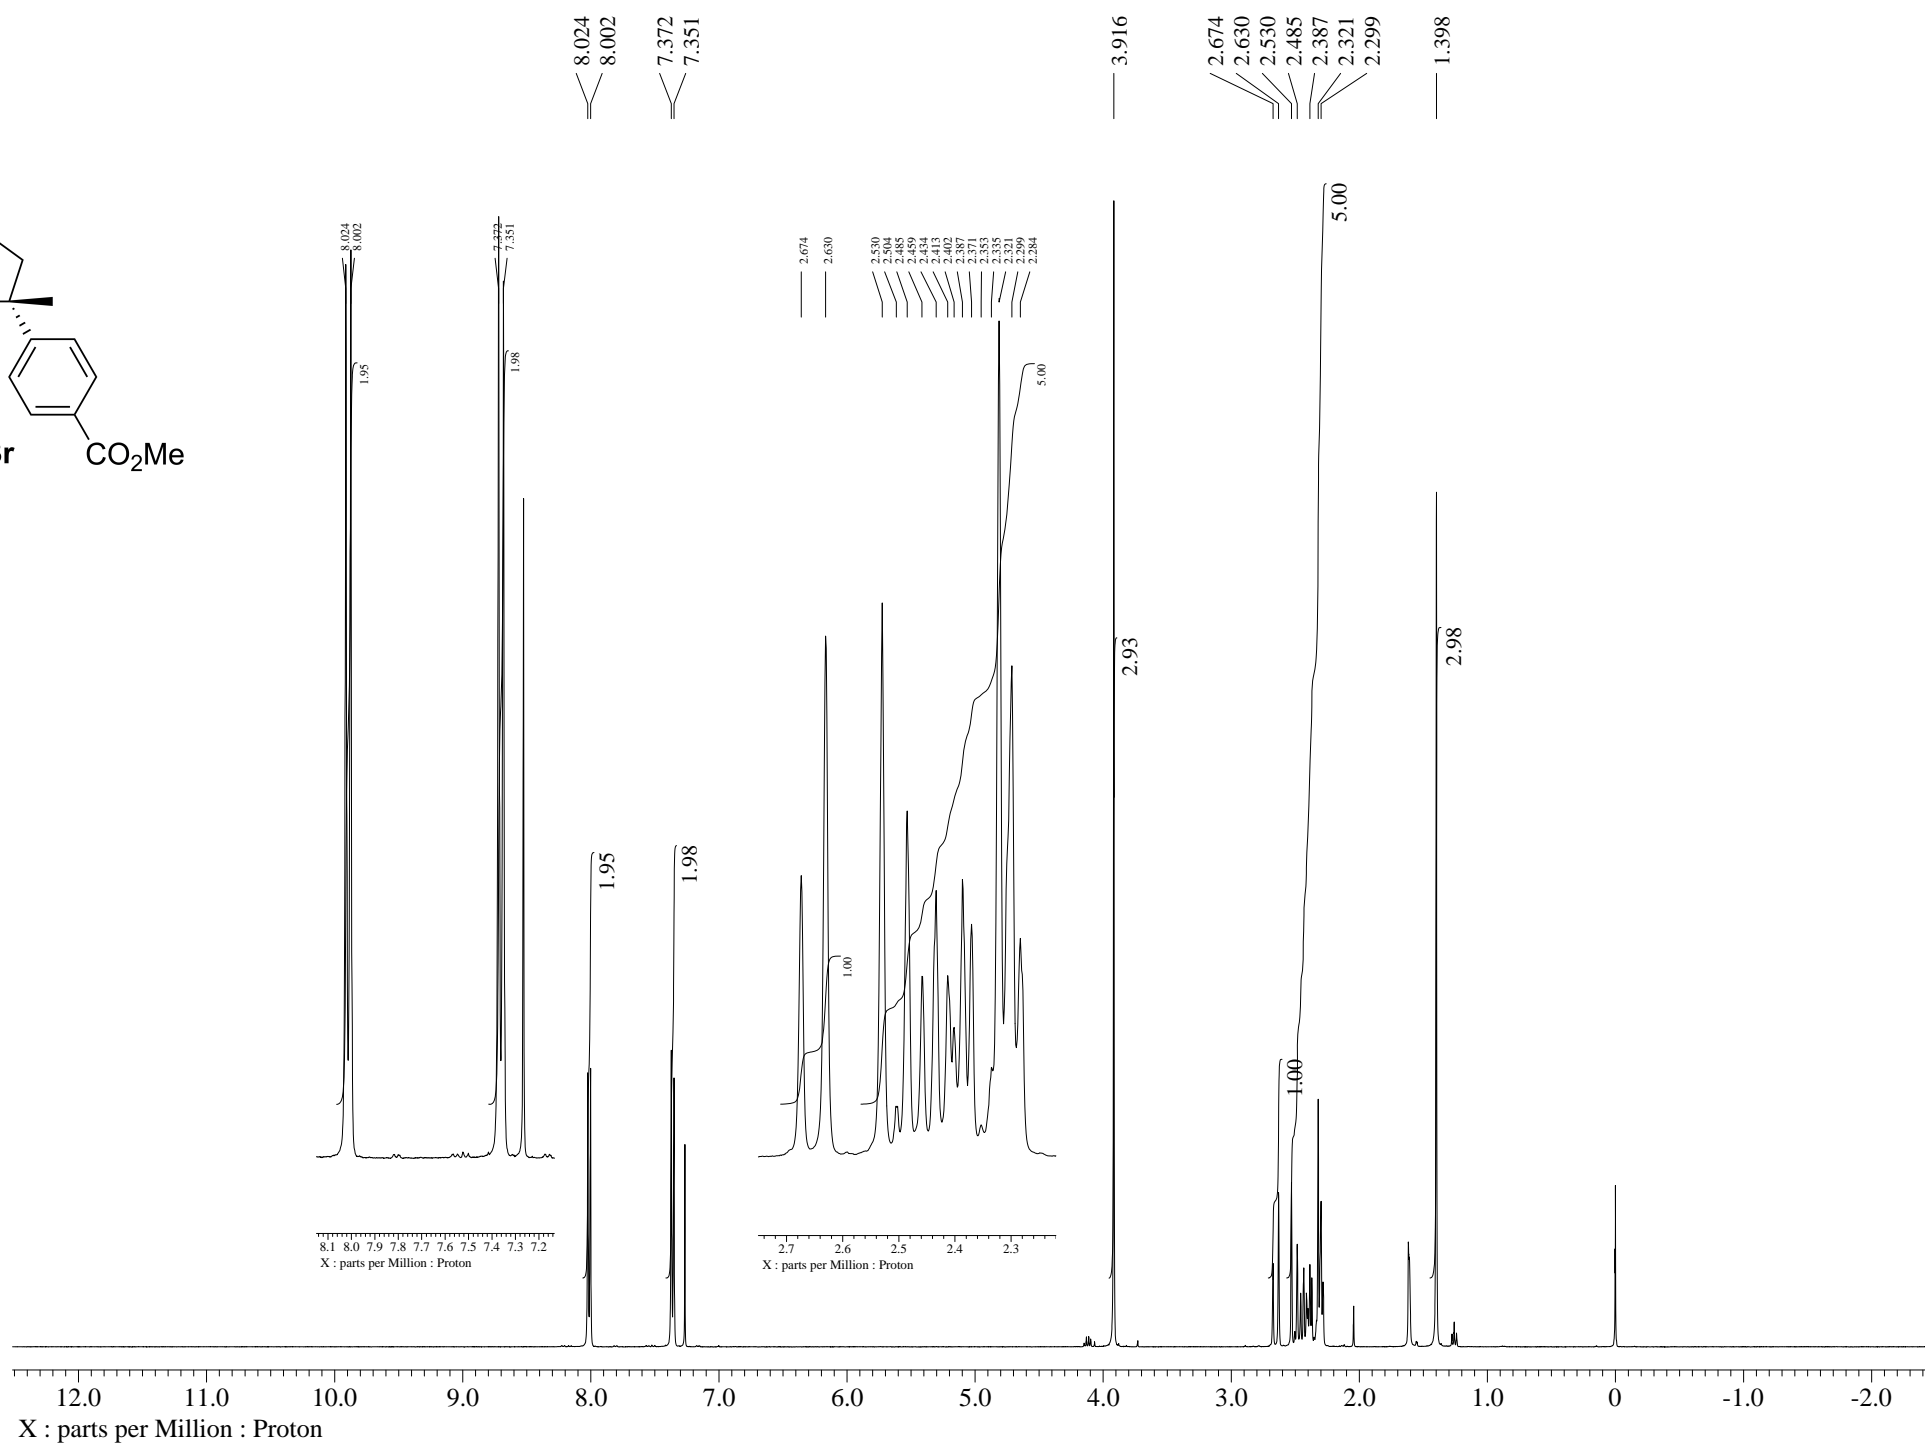

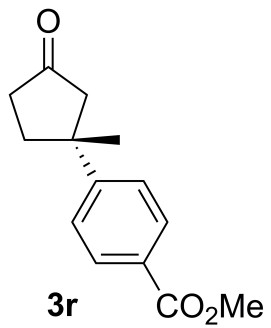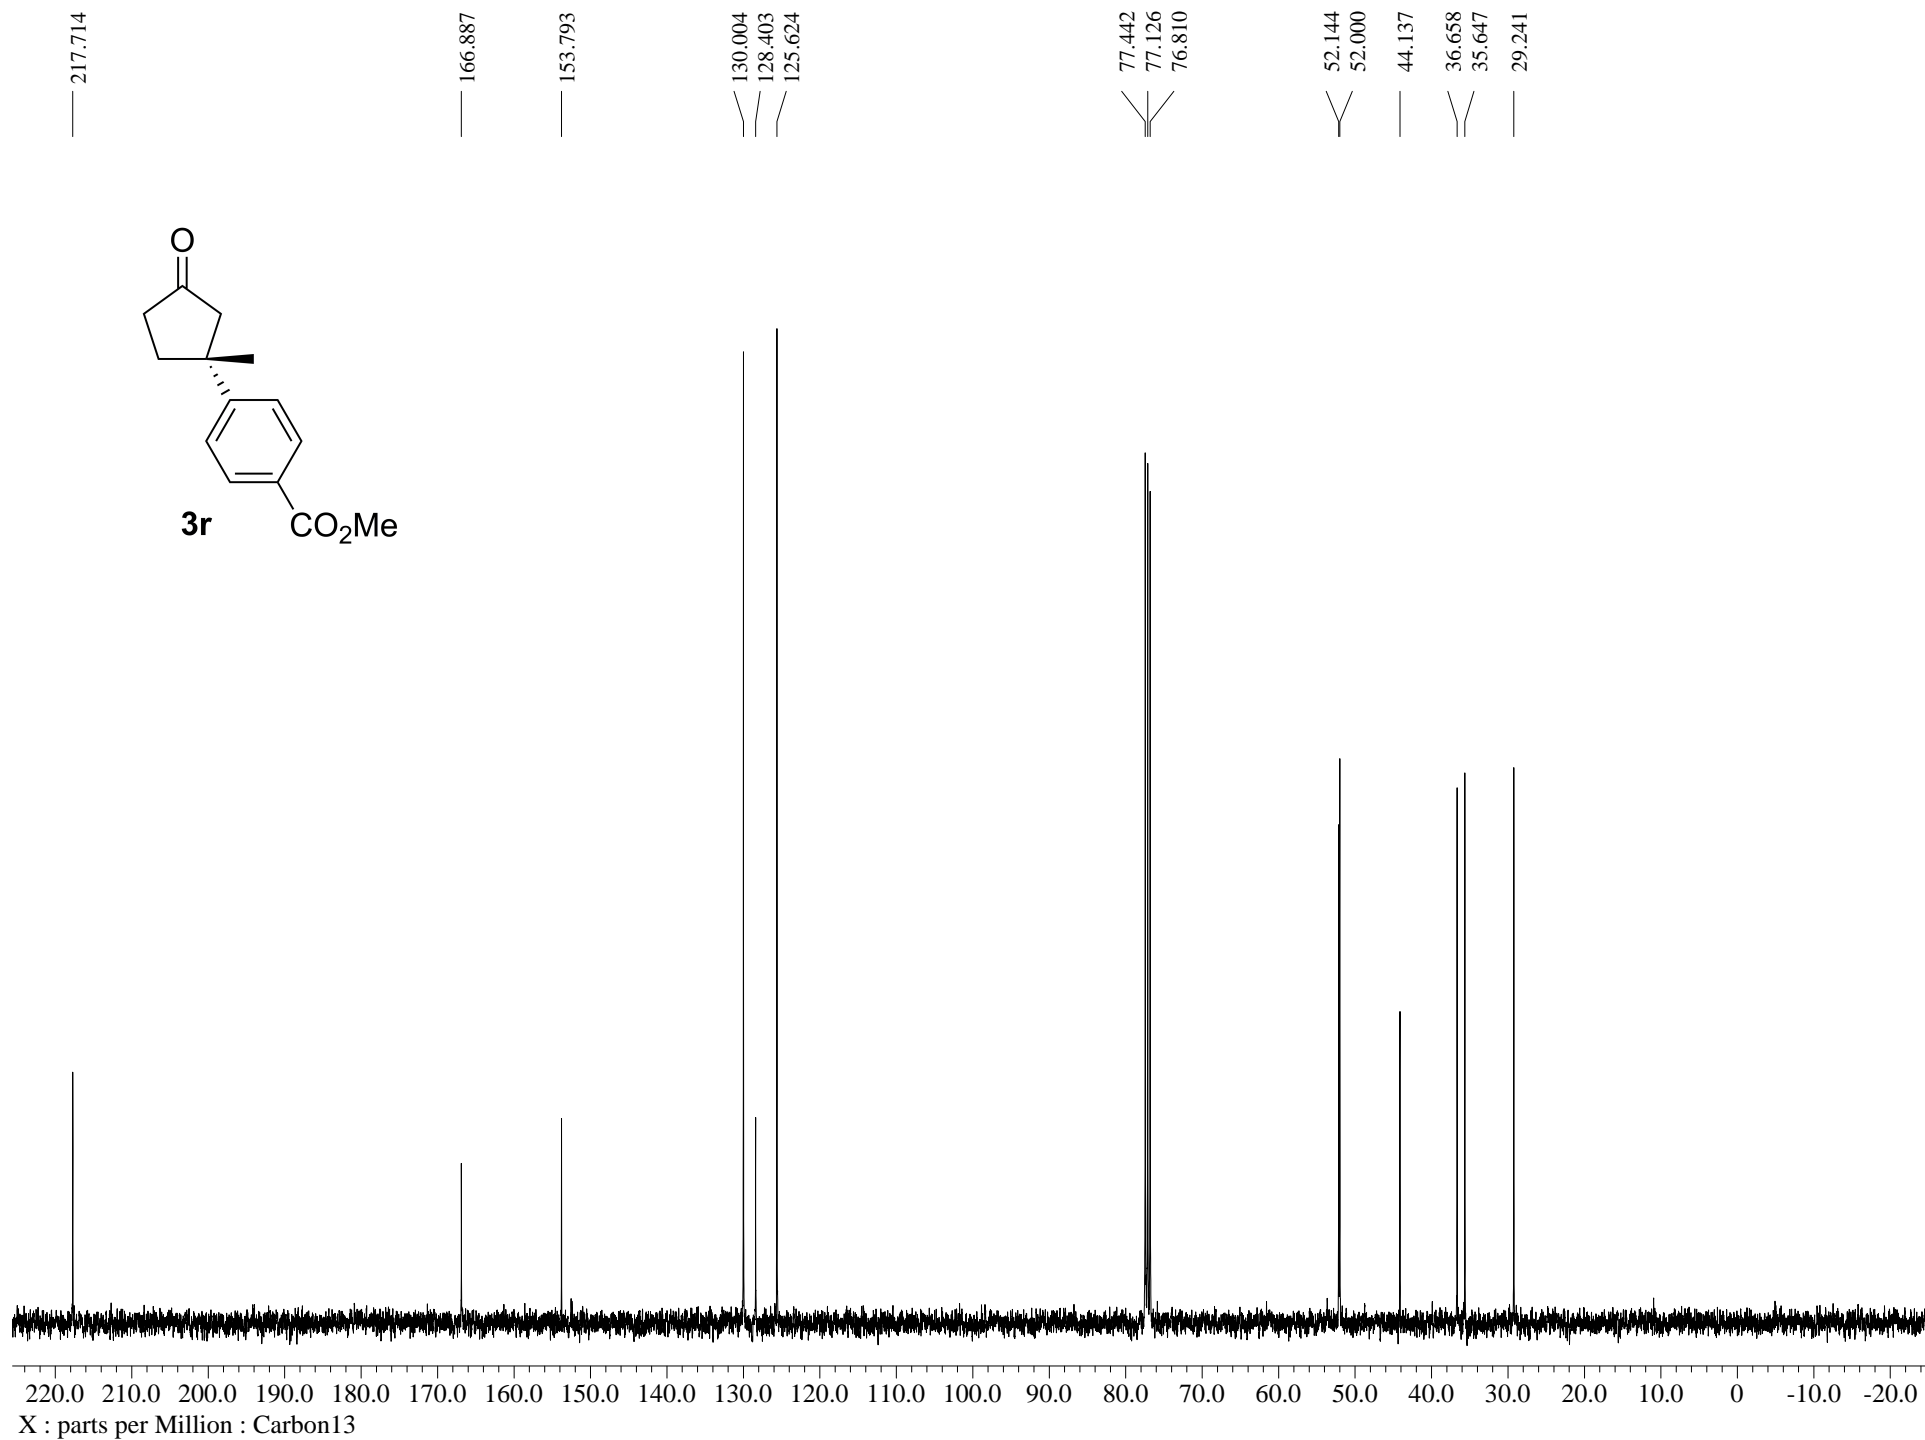

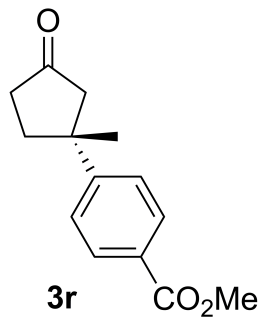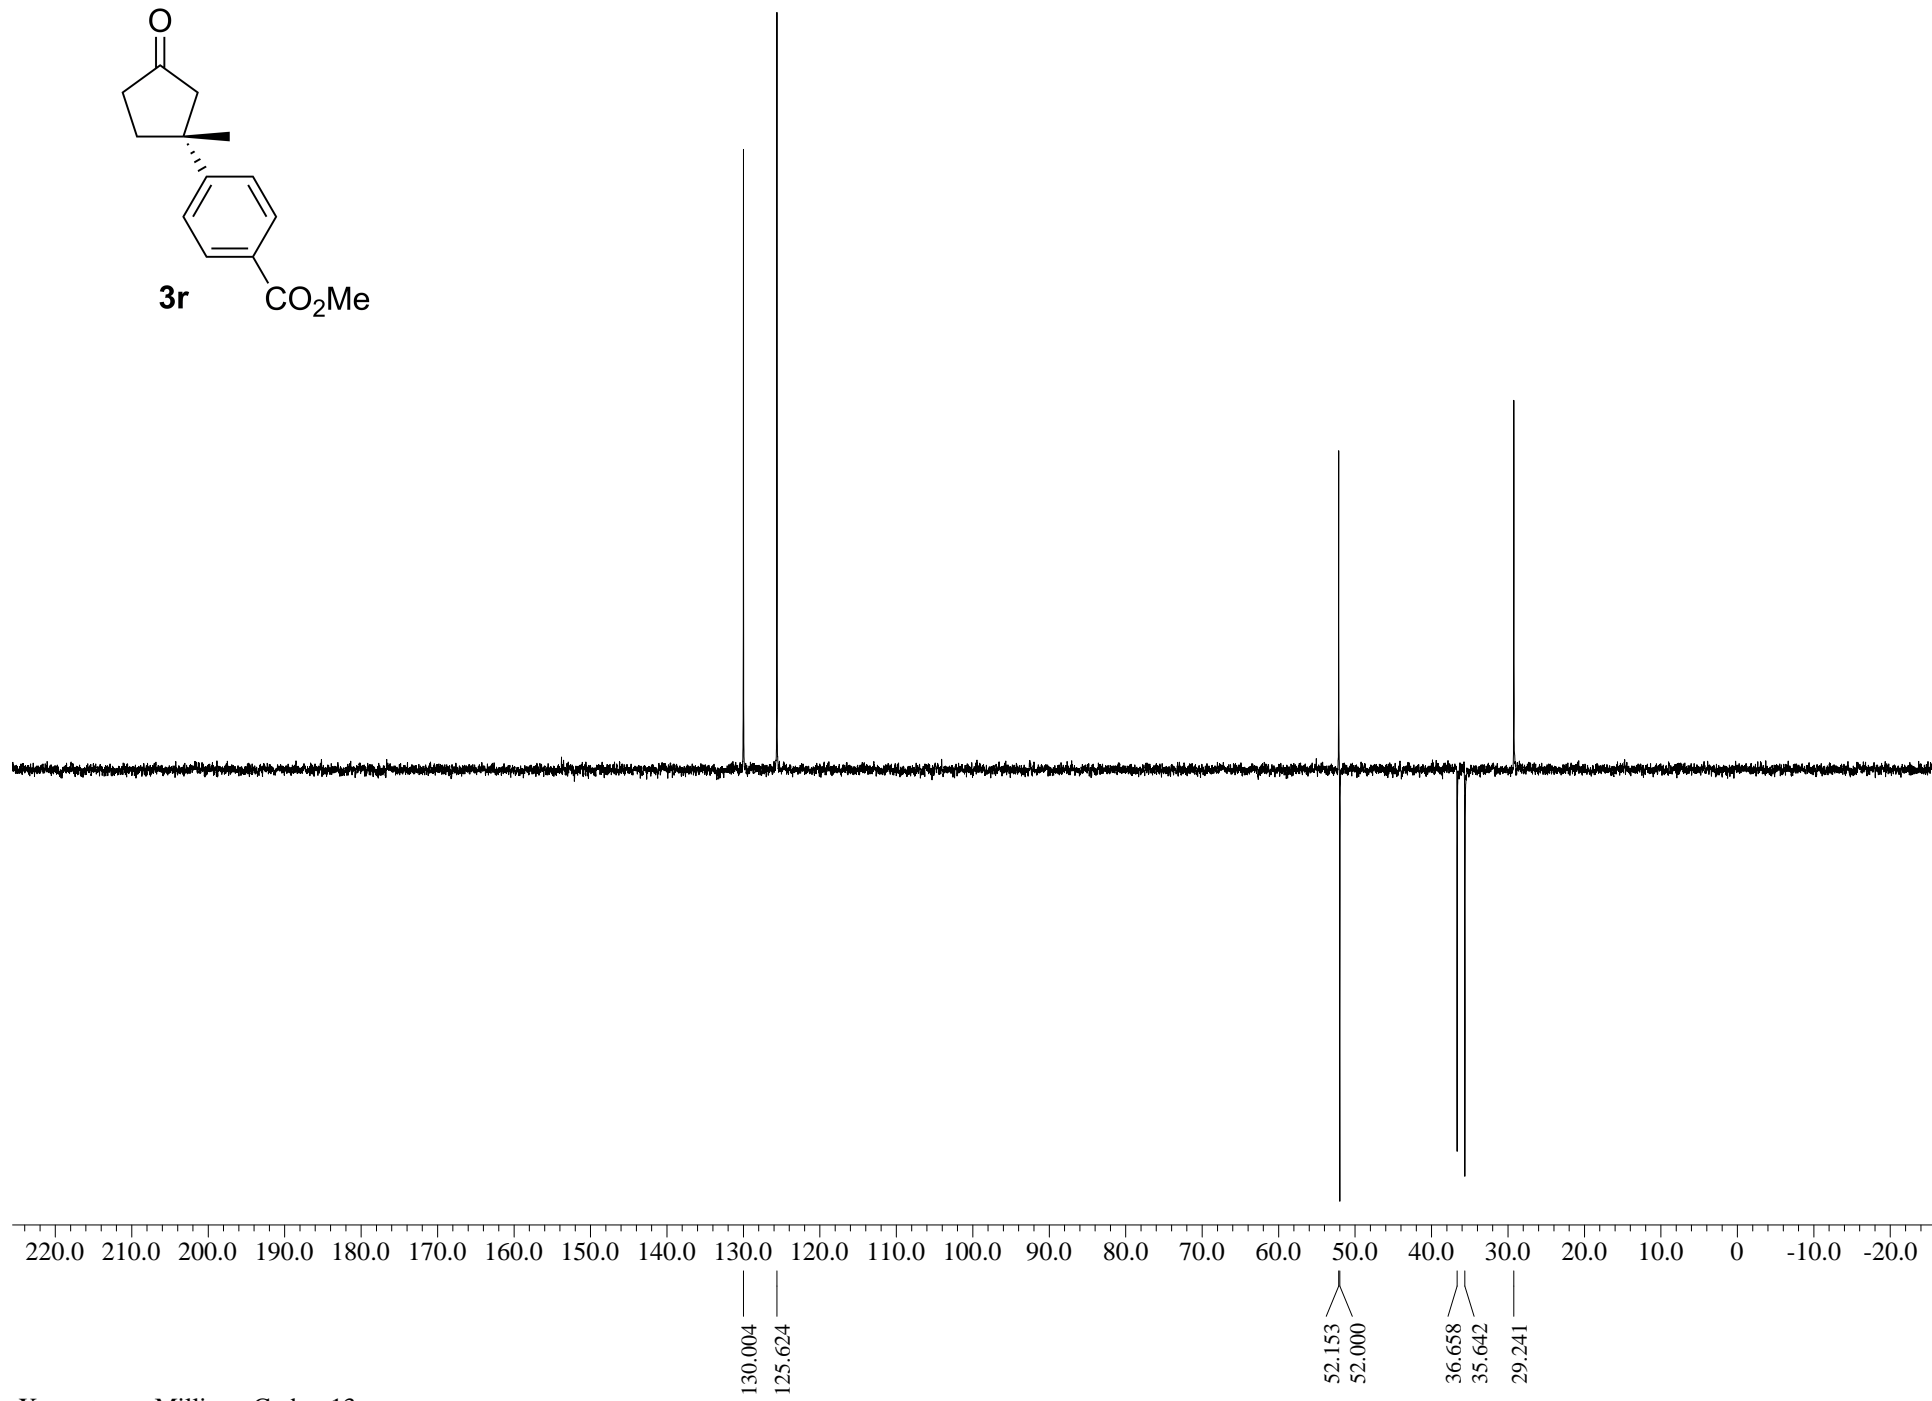

X : parts per Million : Carbon13



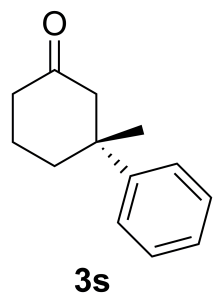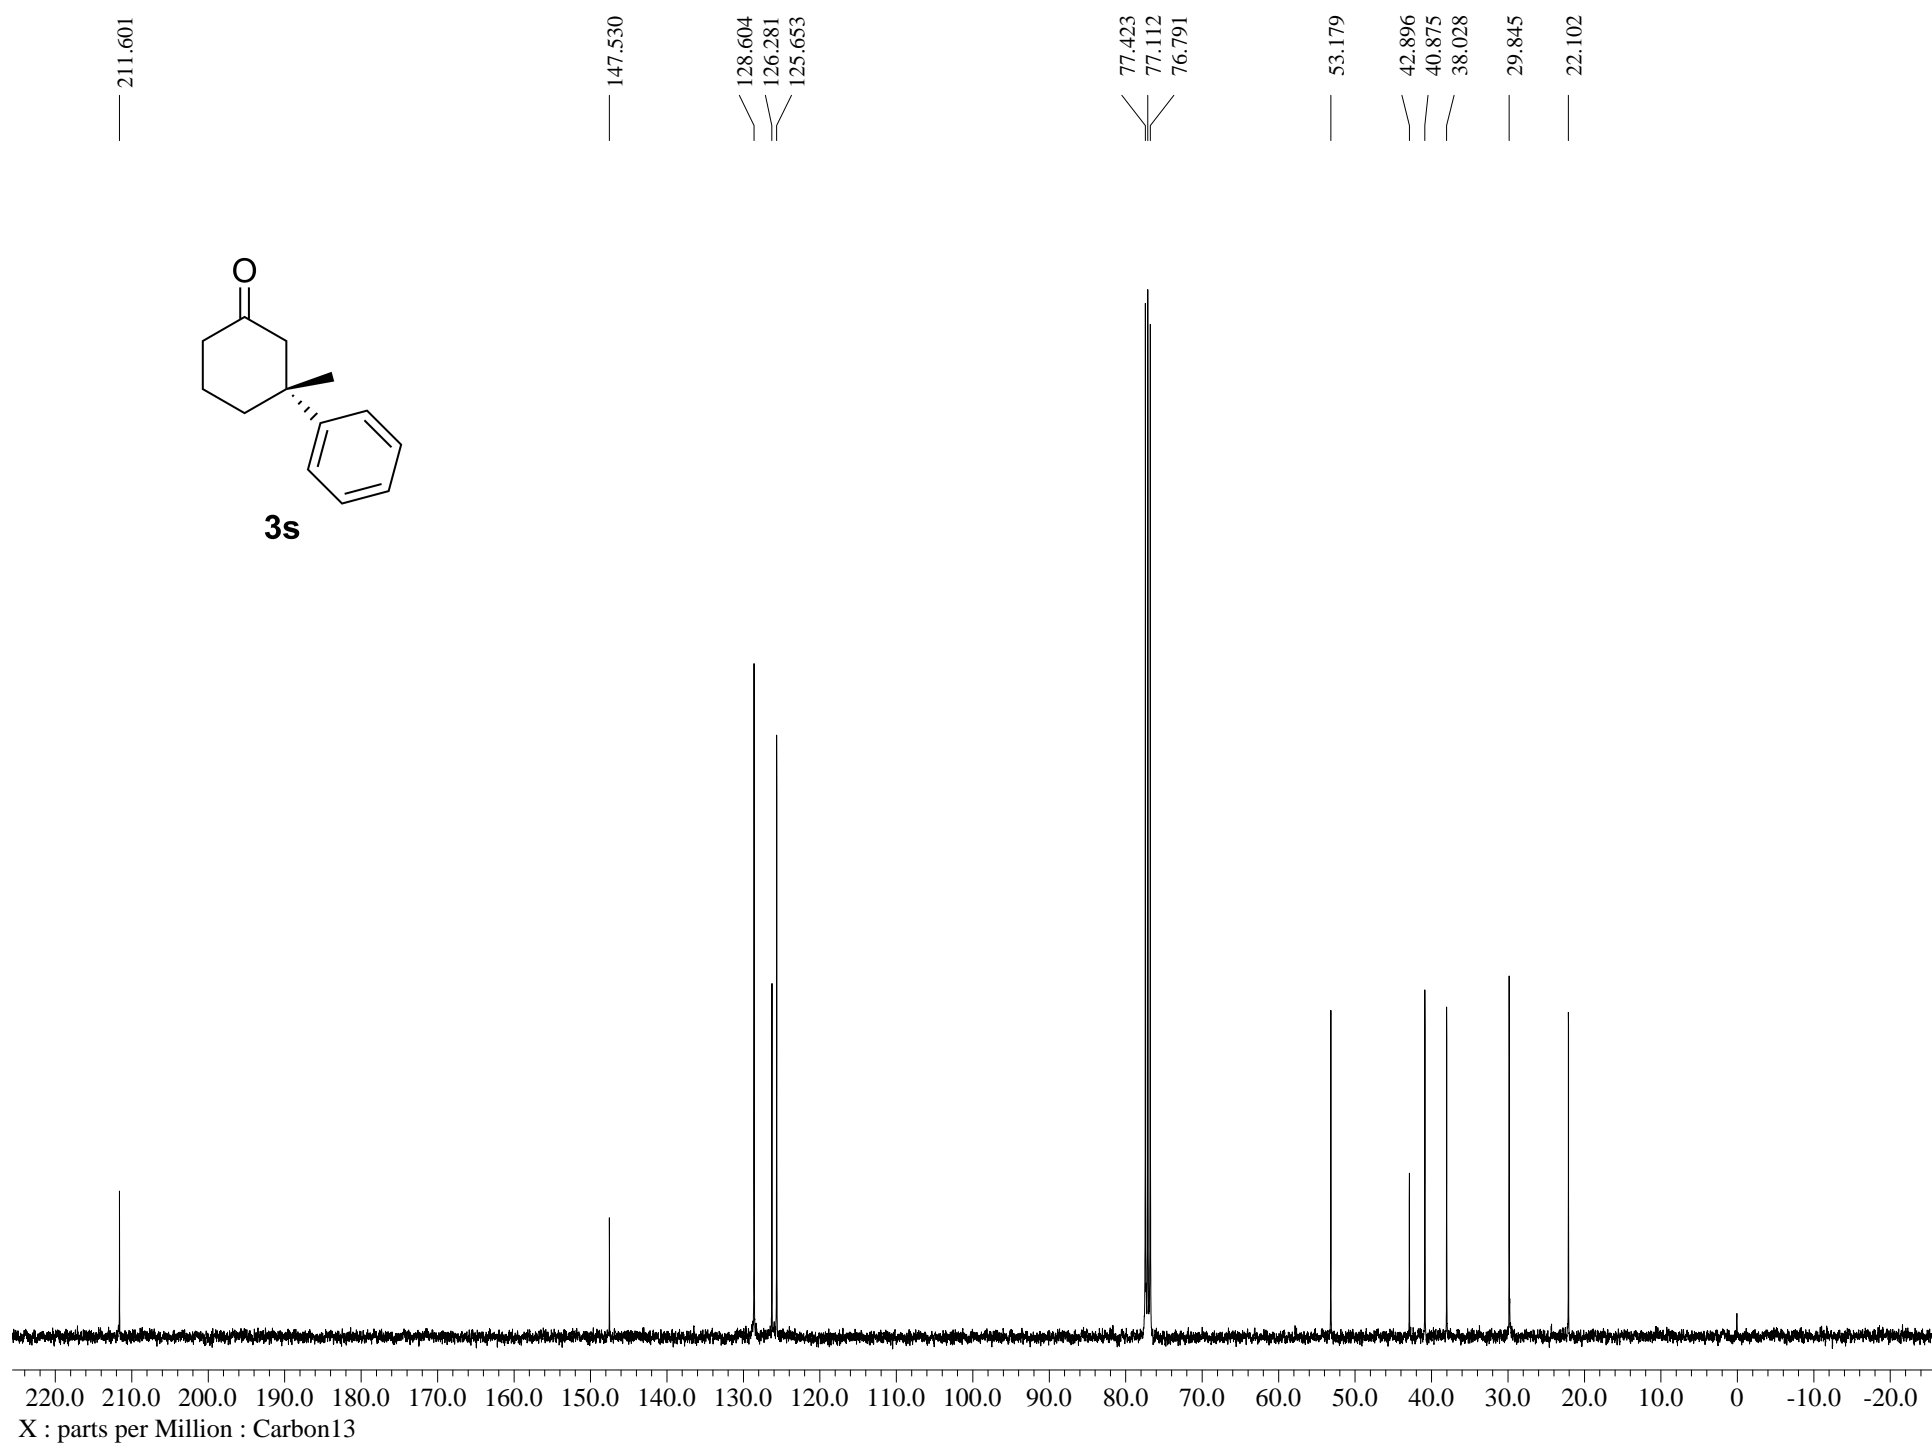

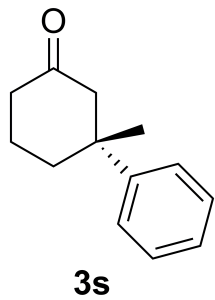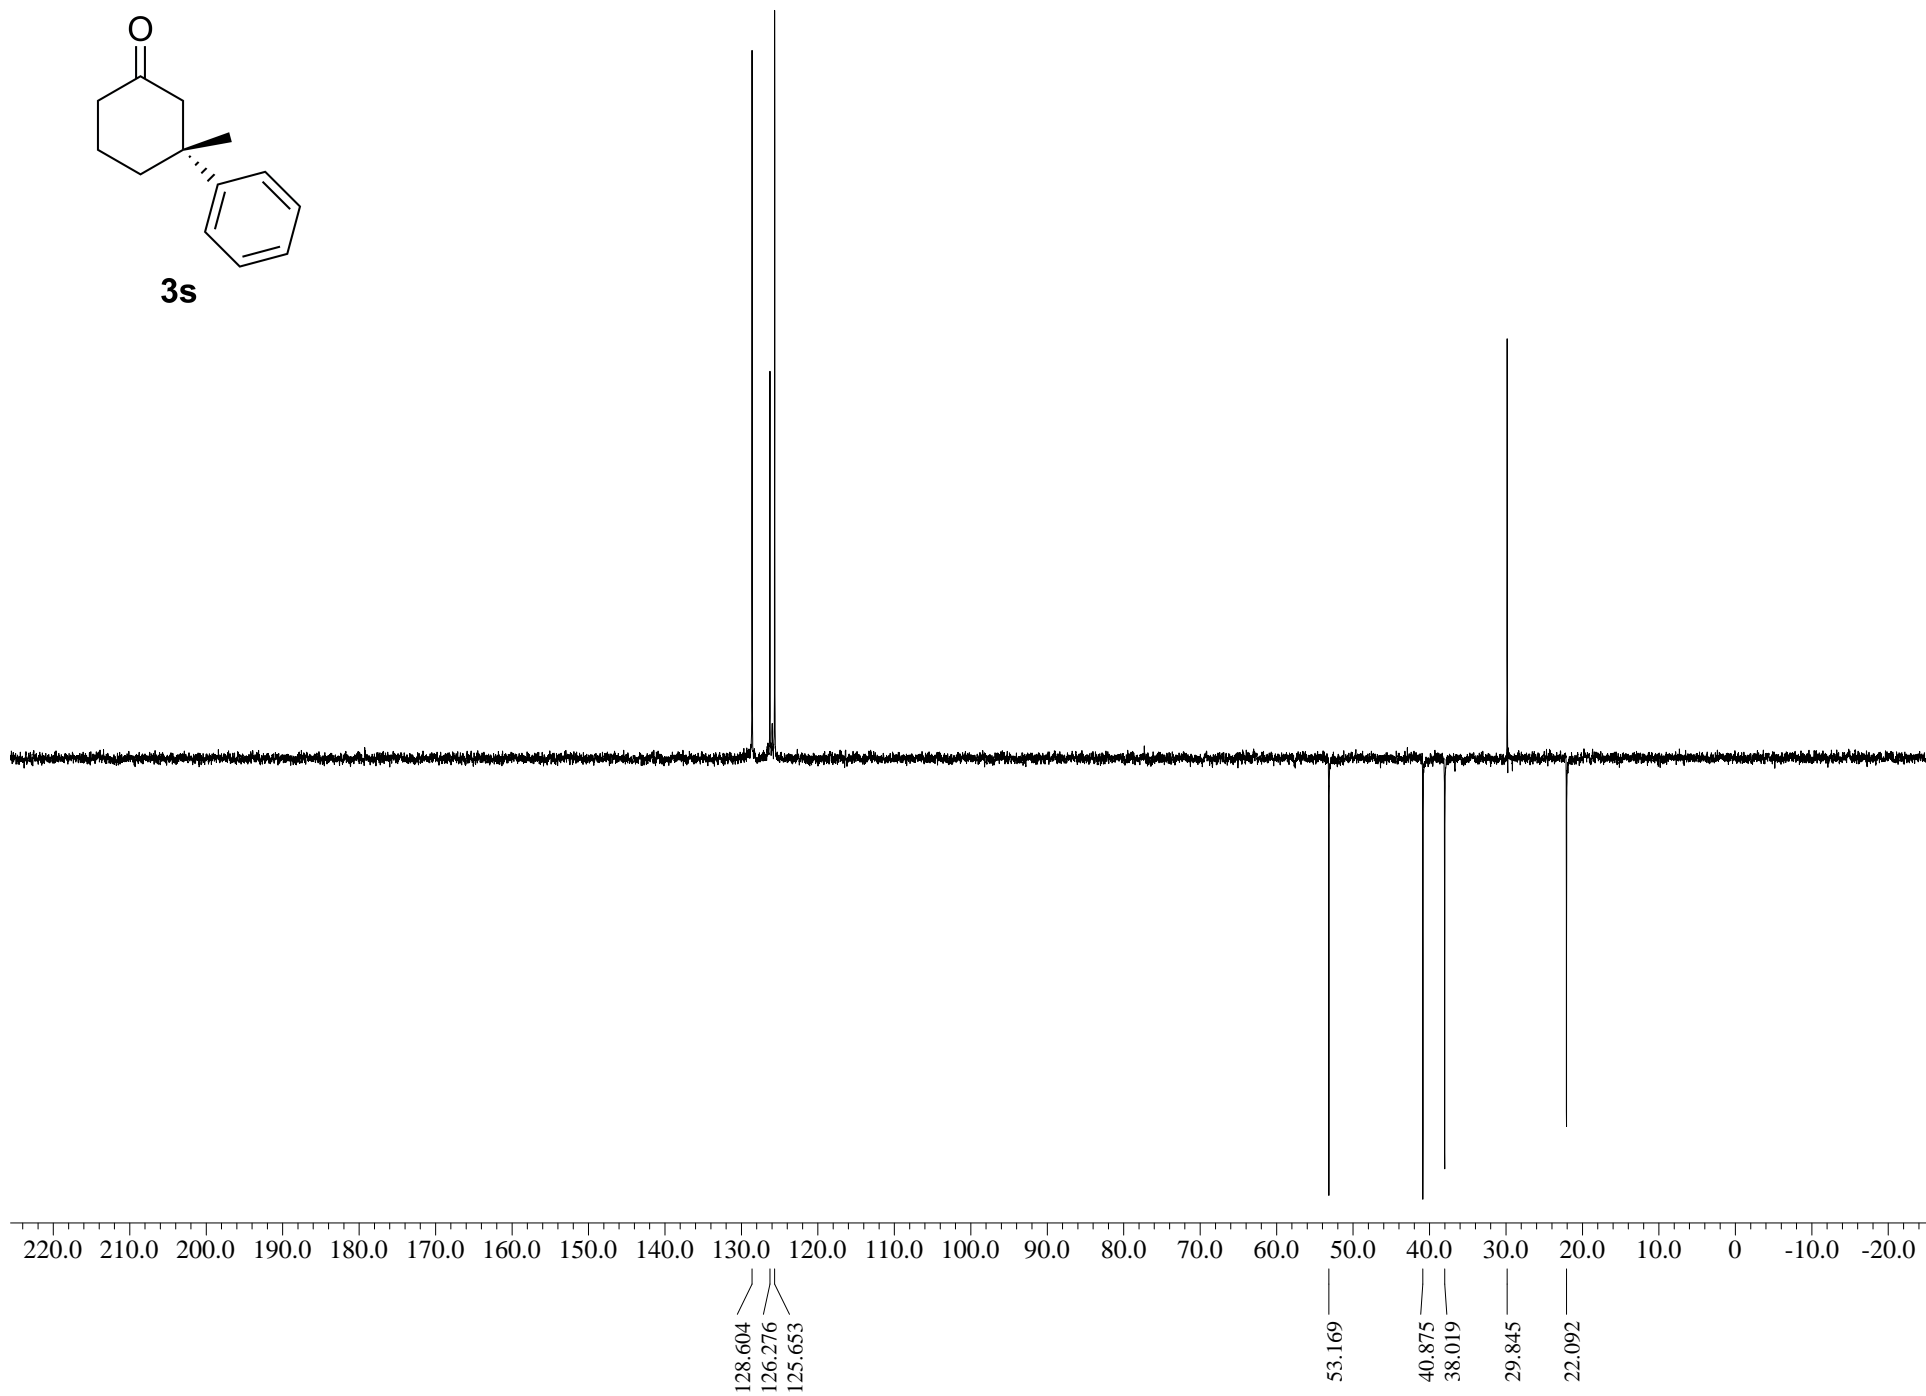

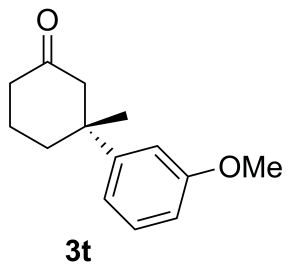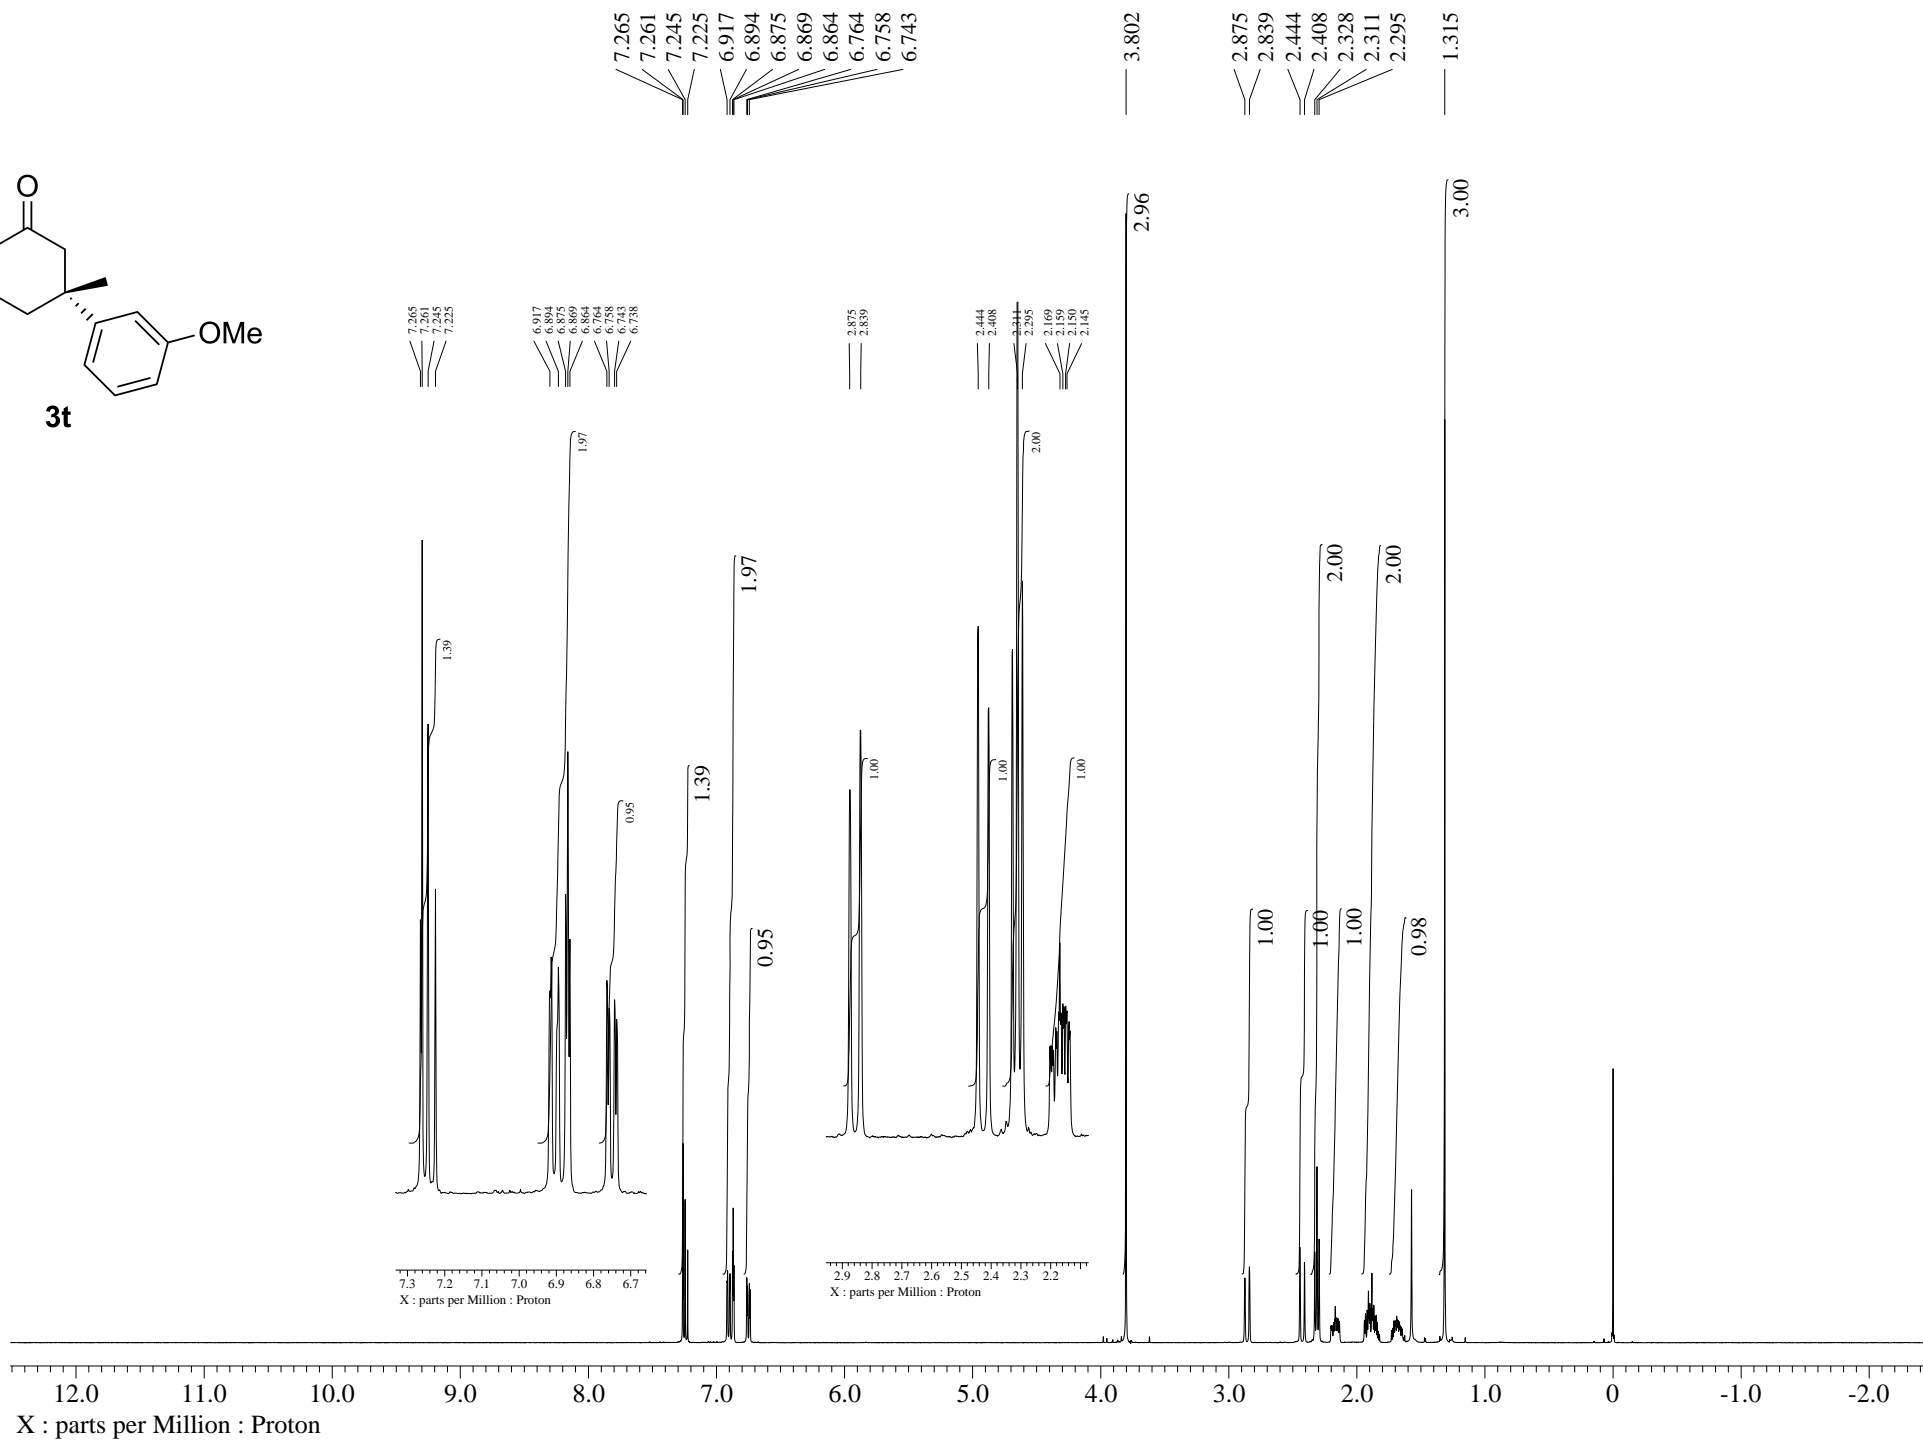



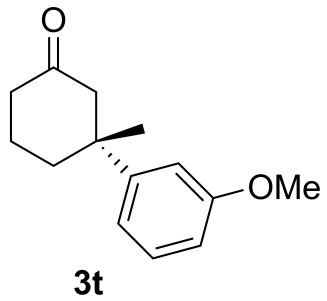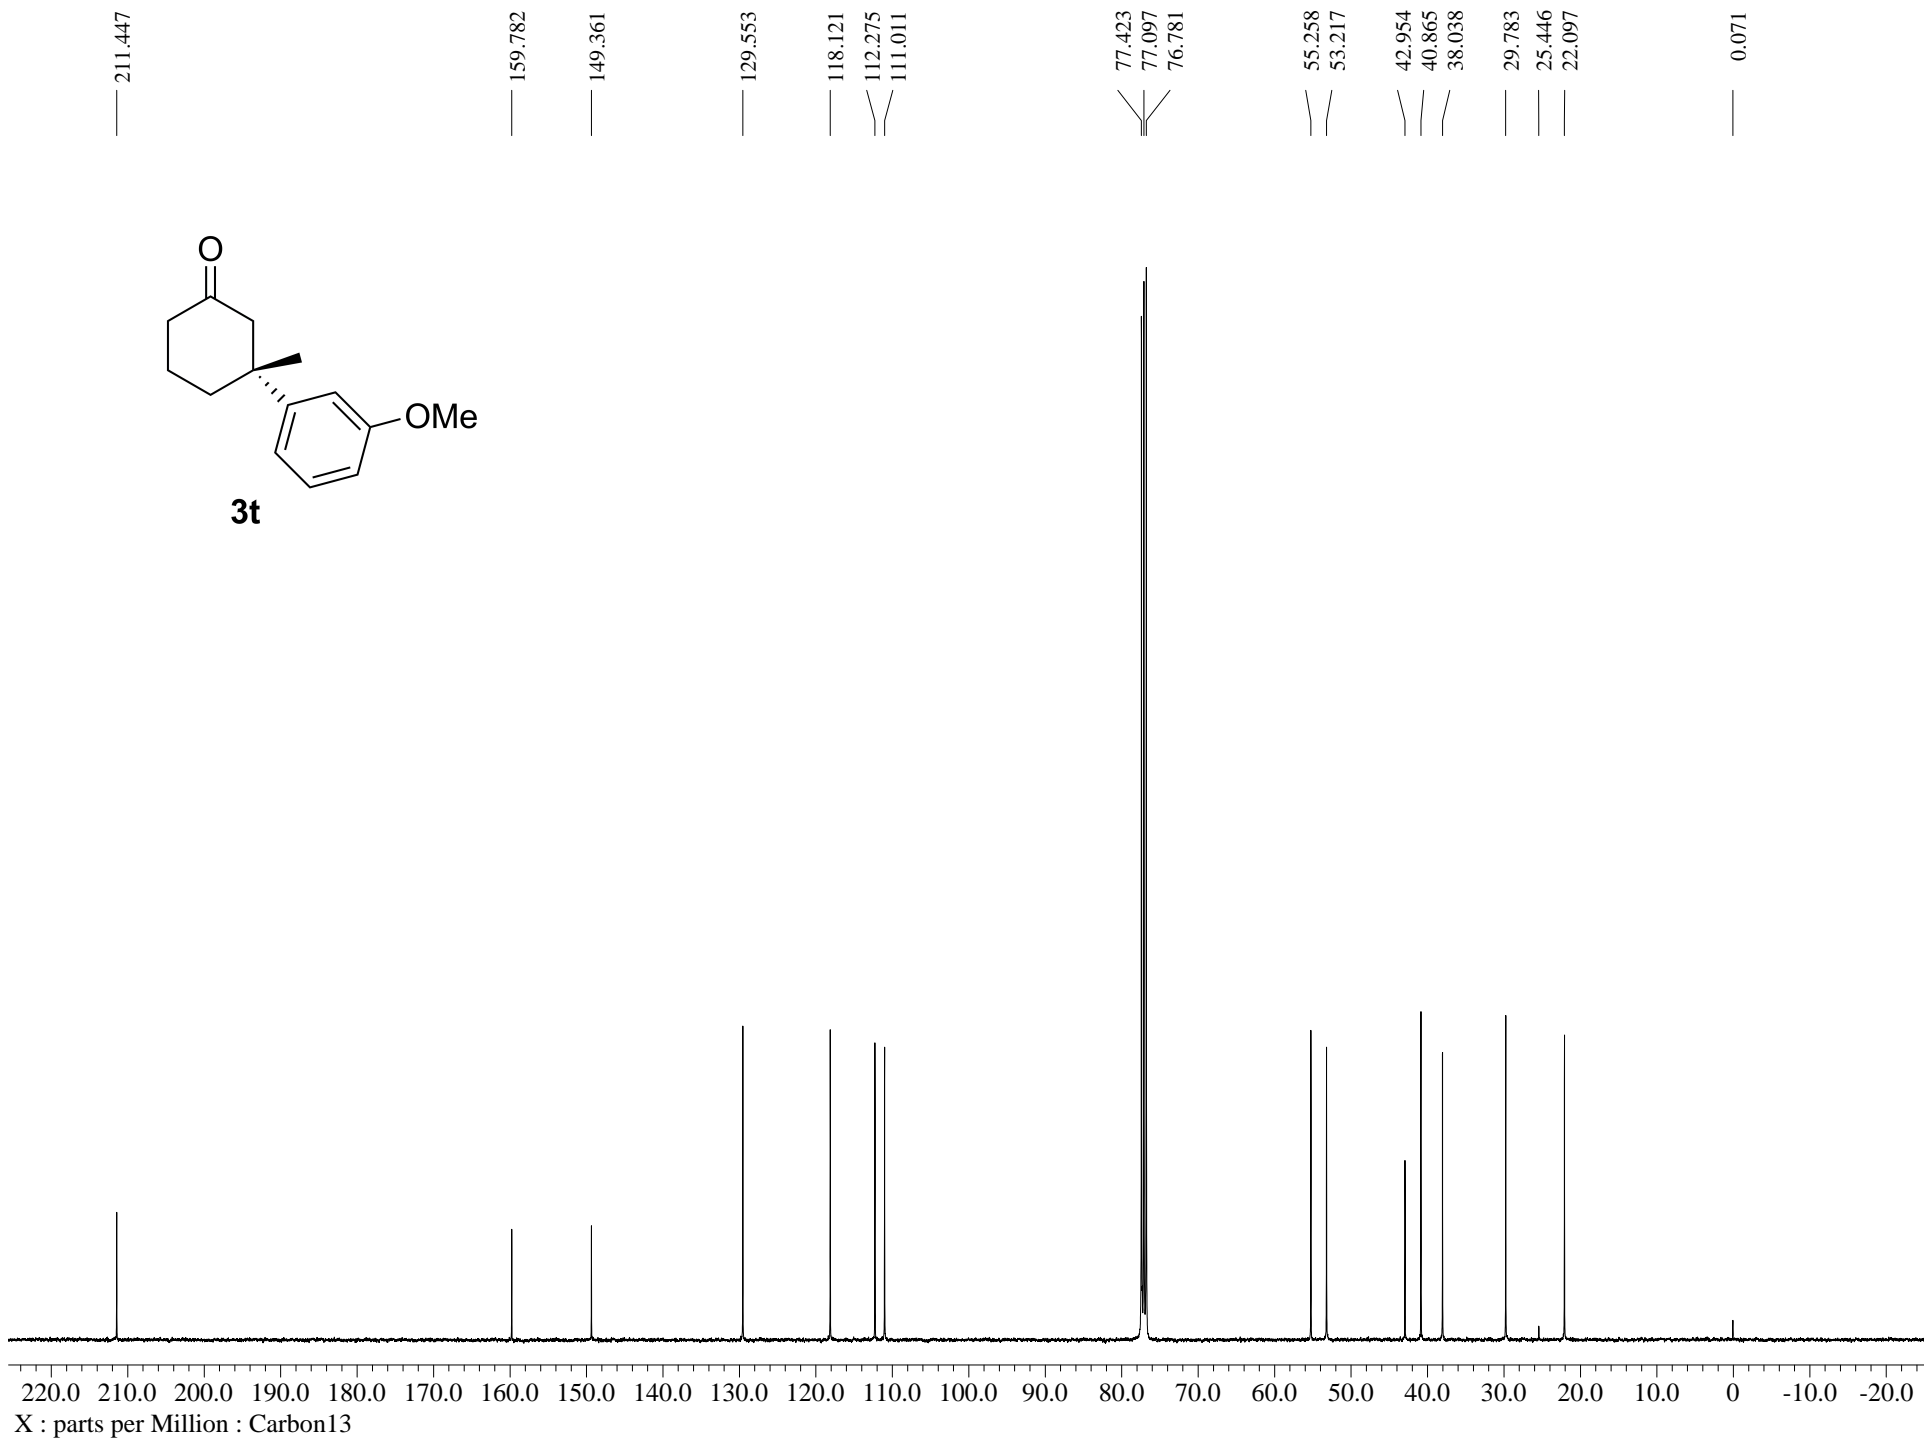

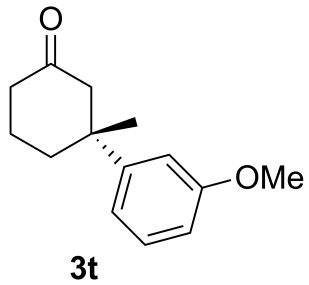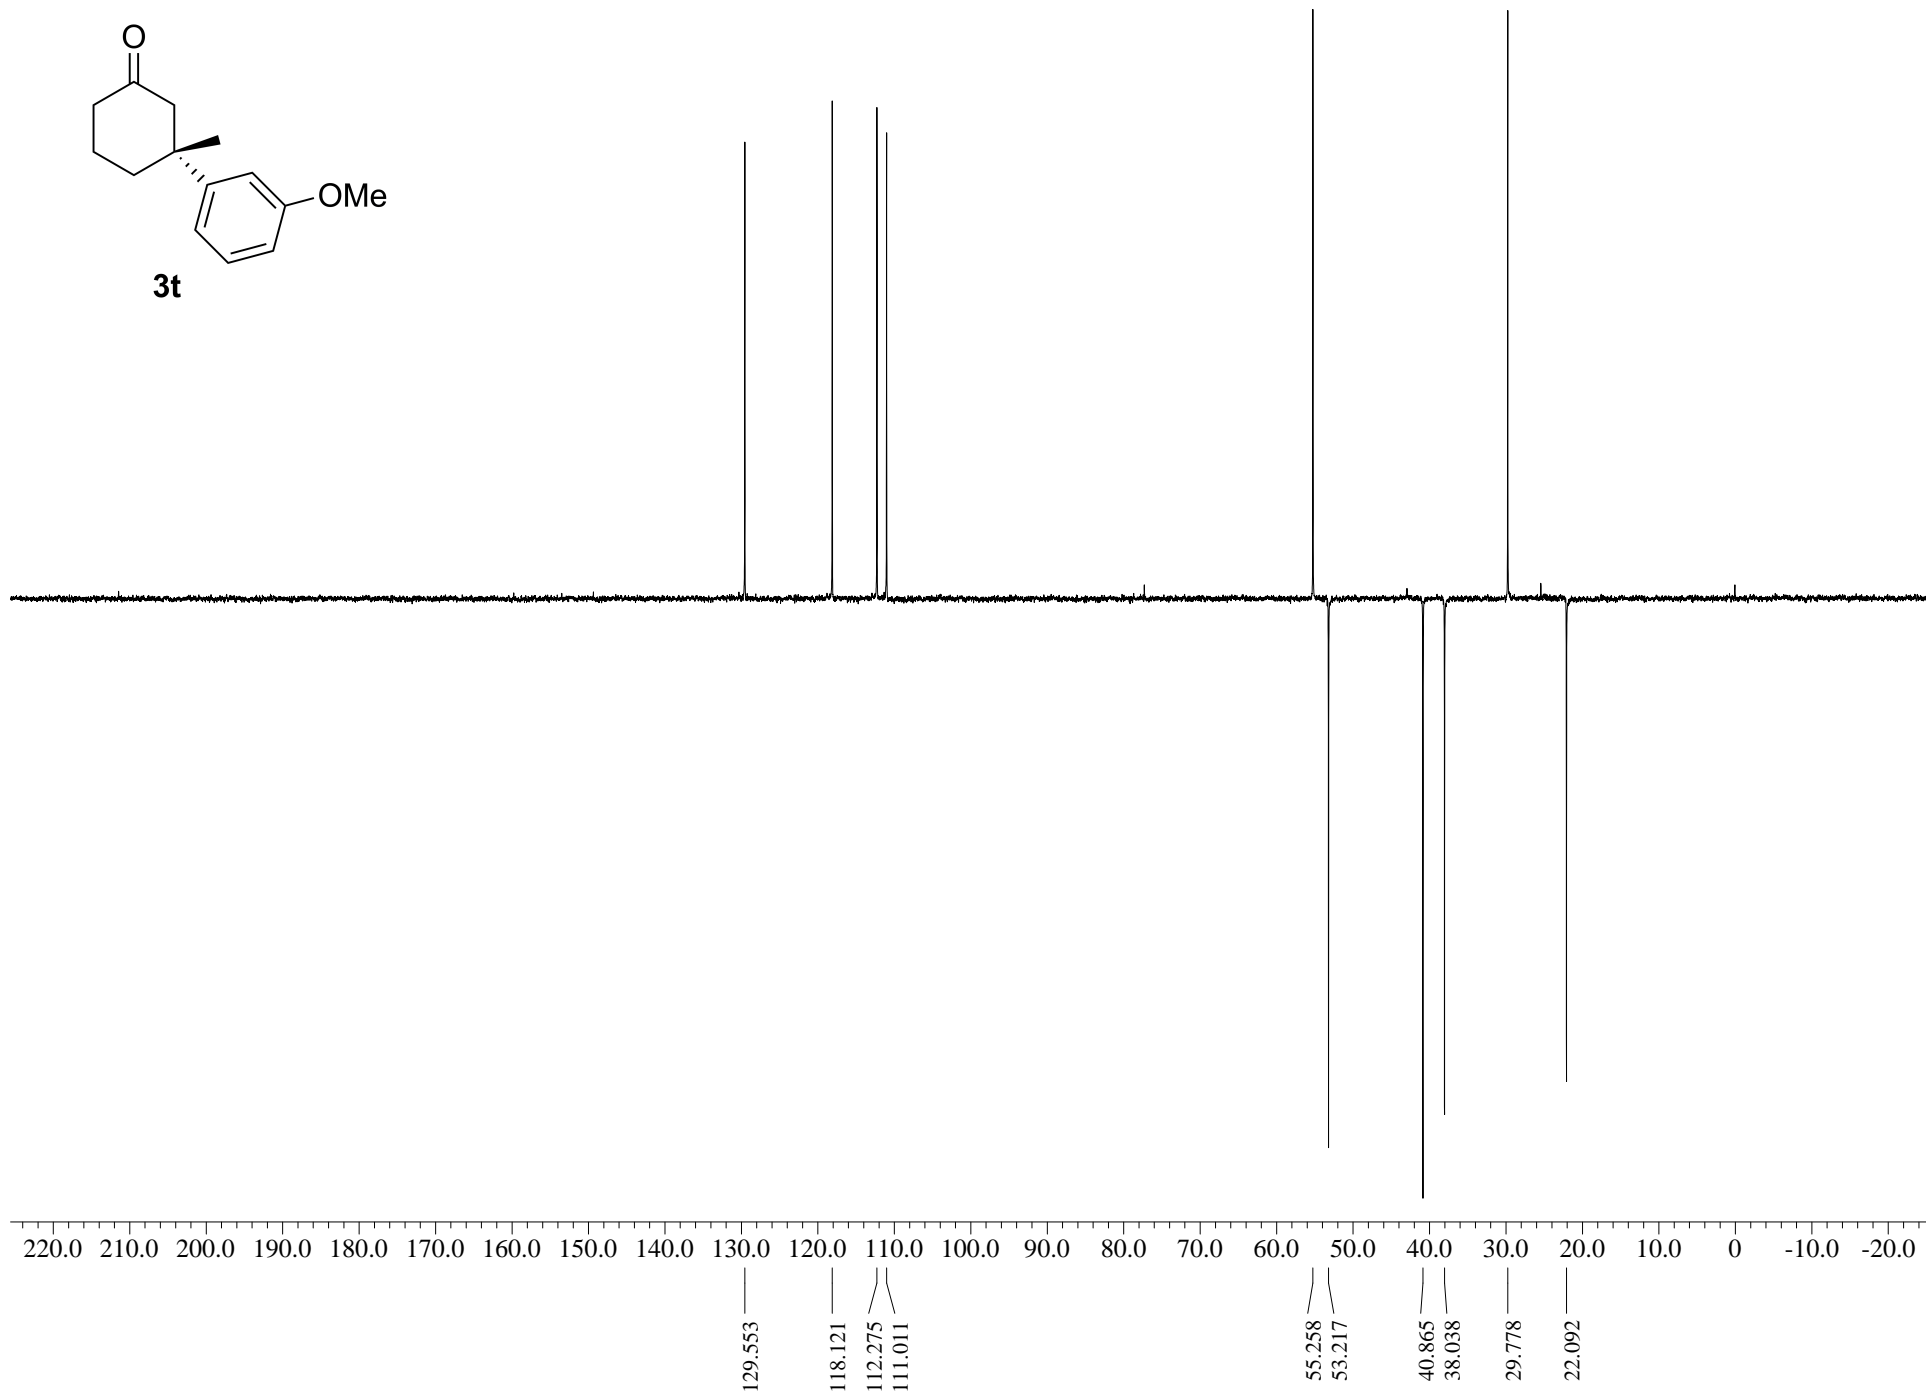

X : parts per Million : Carbon13

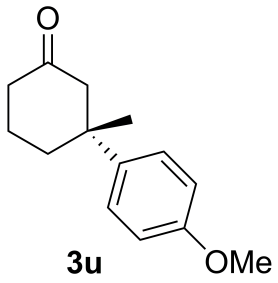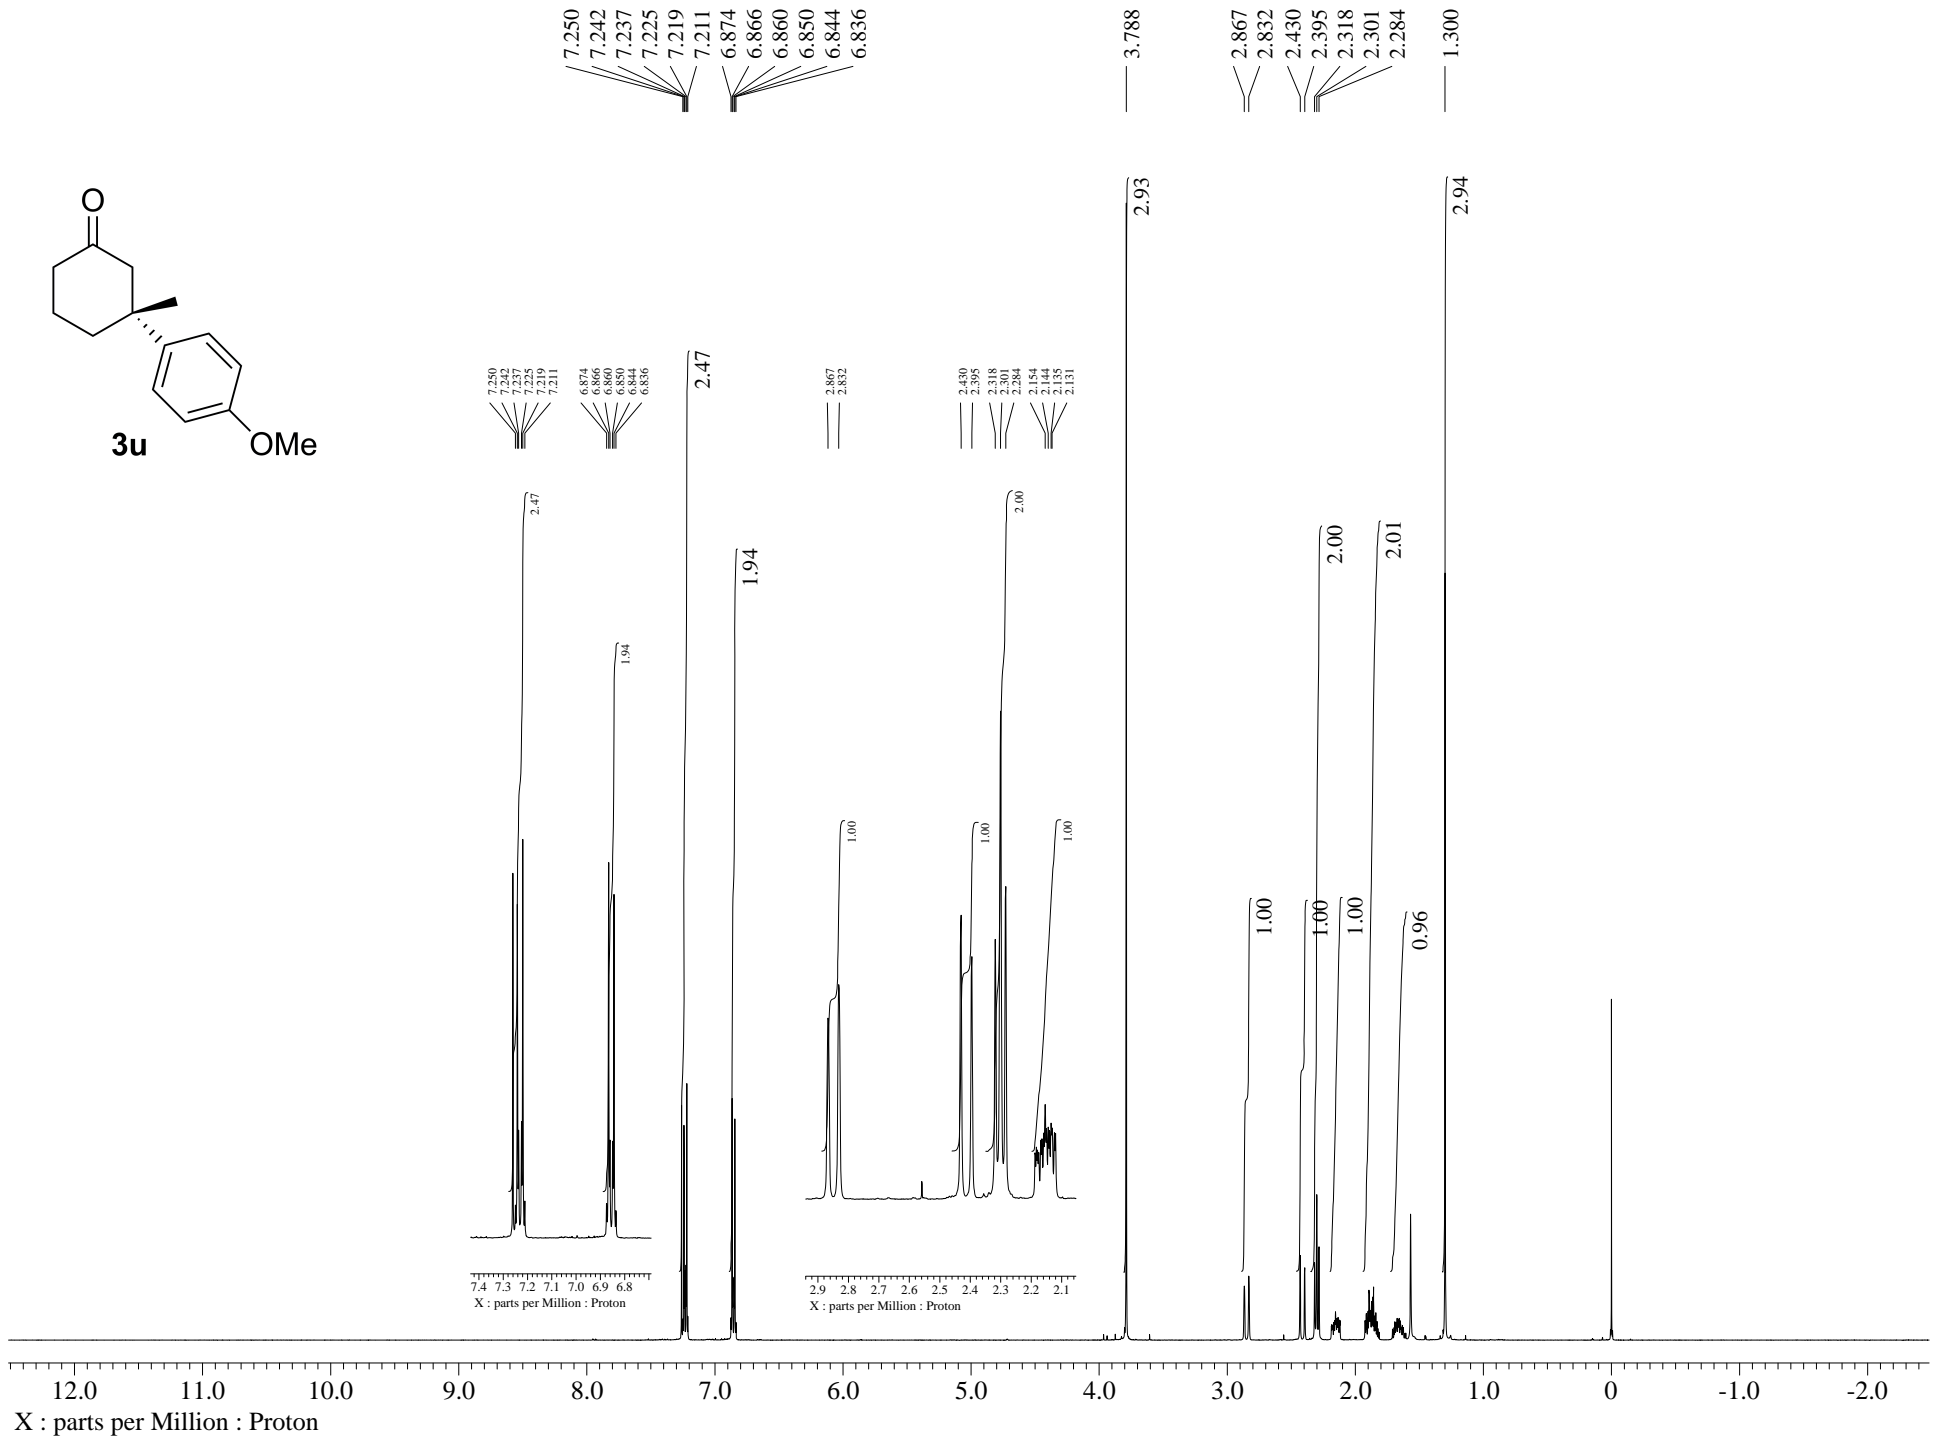

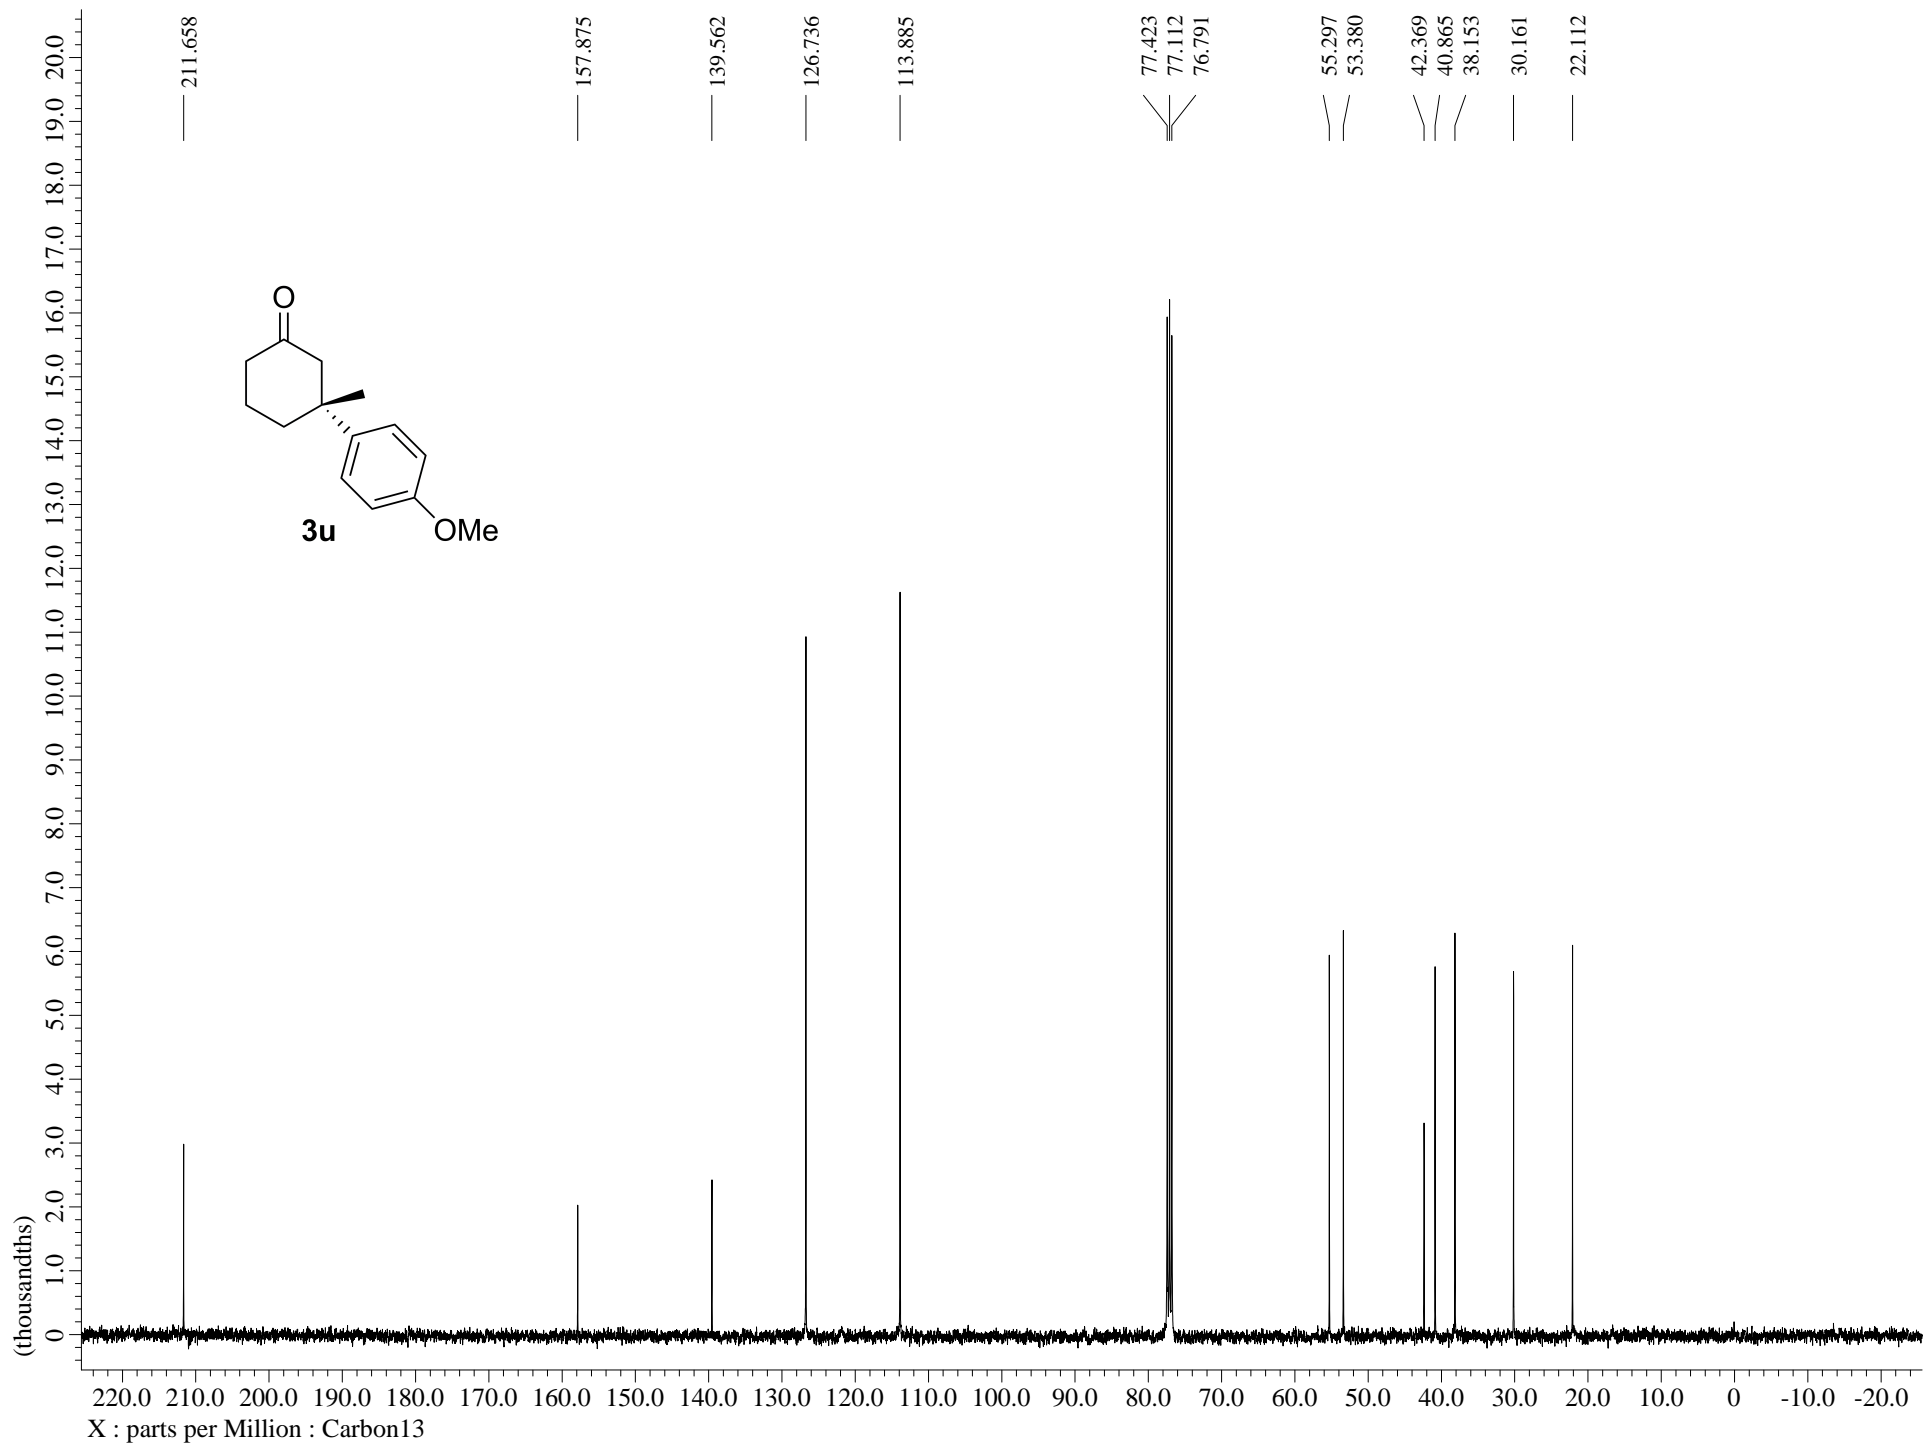

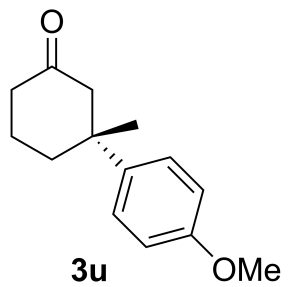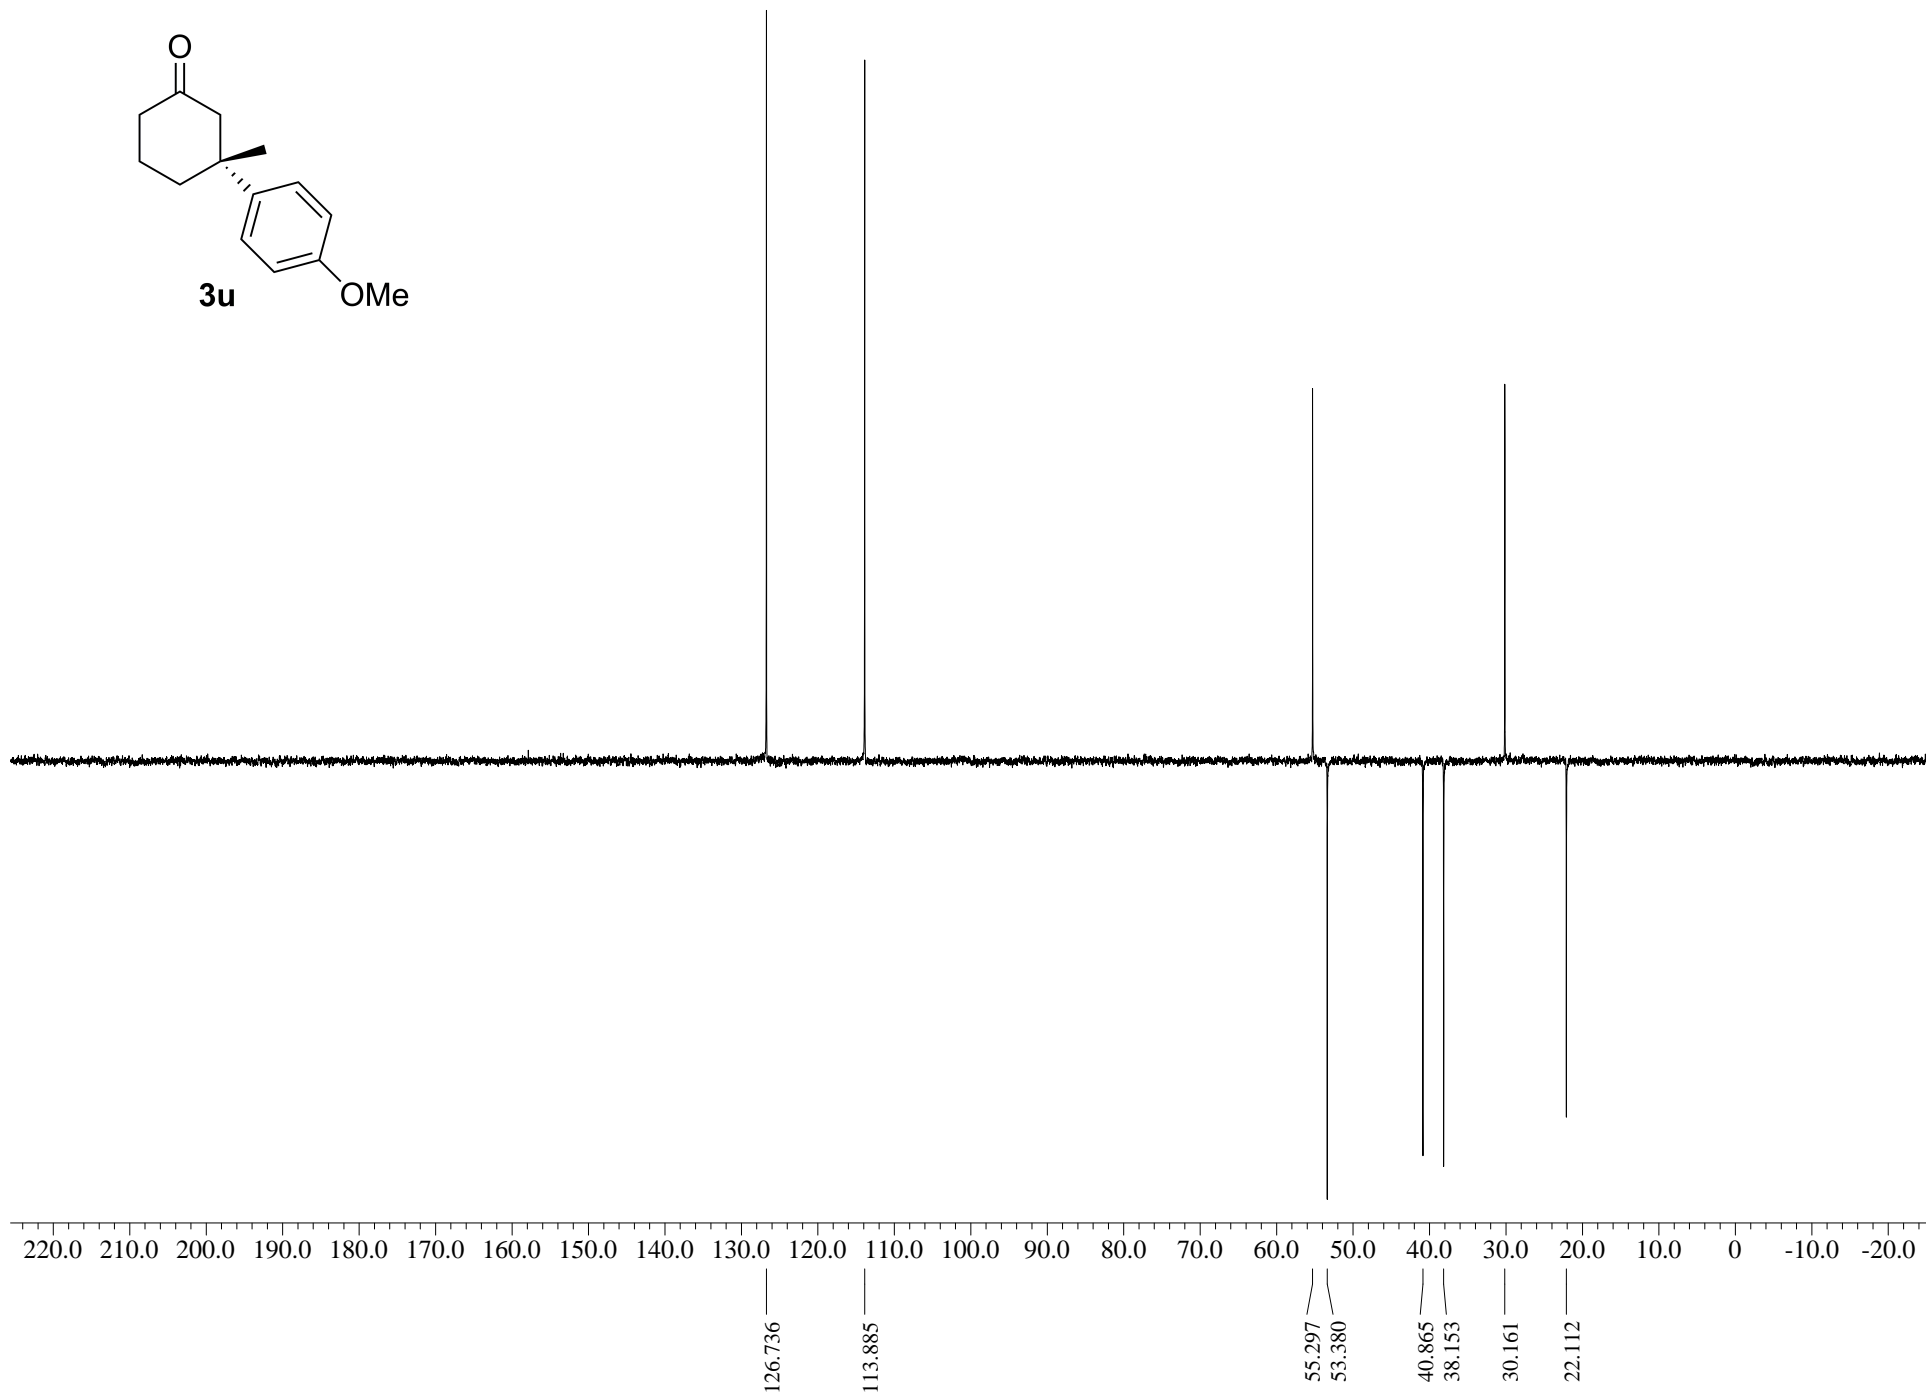

X : parts per Million : Carbon13

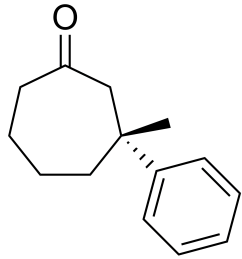

**3v**

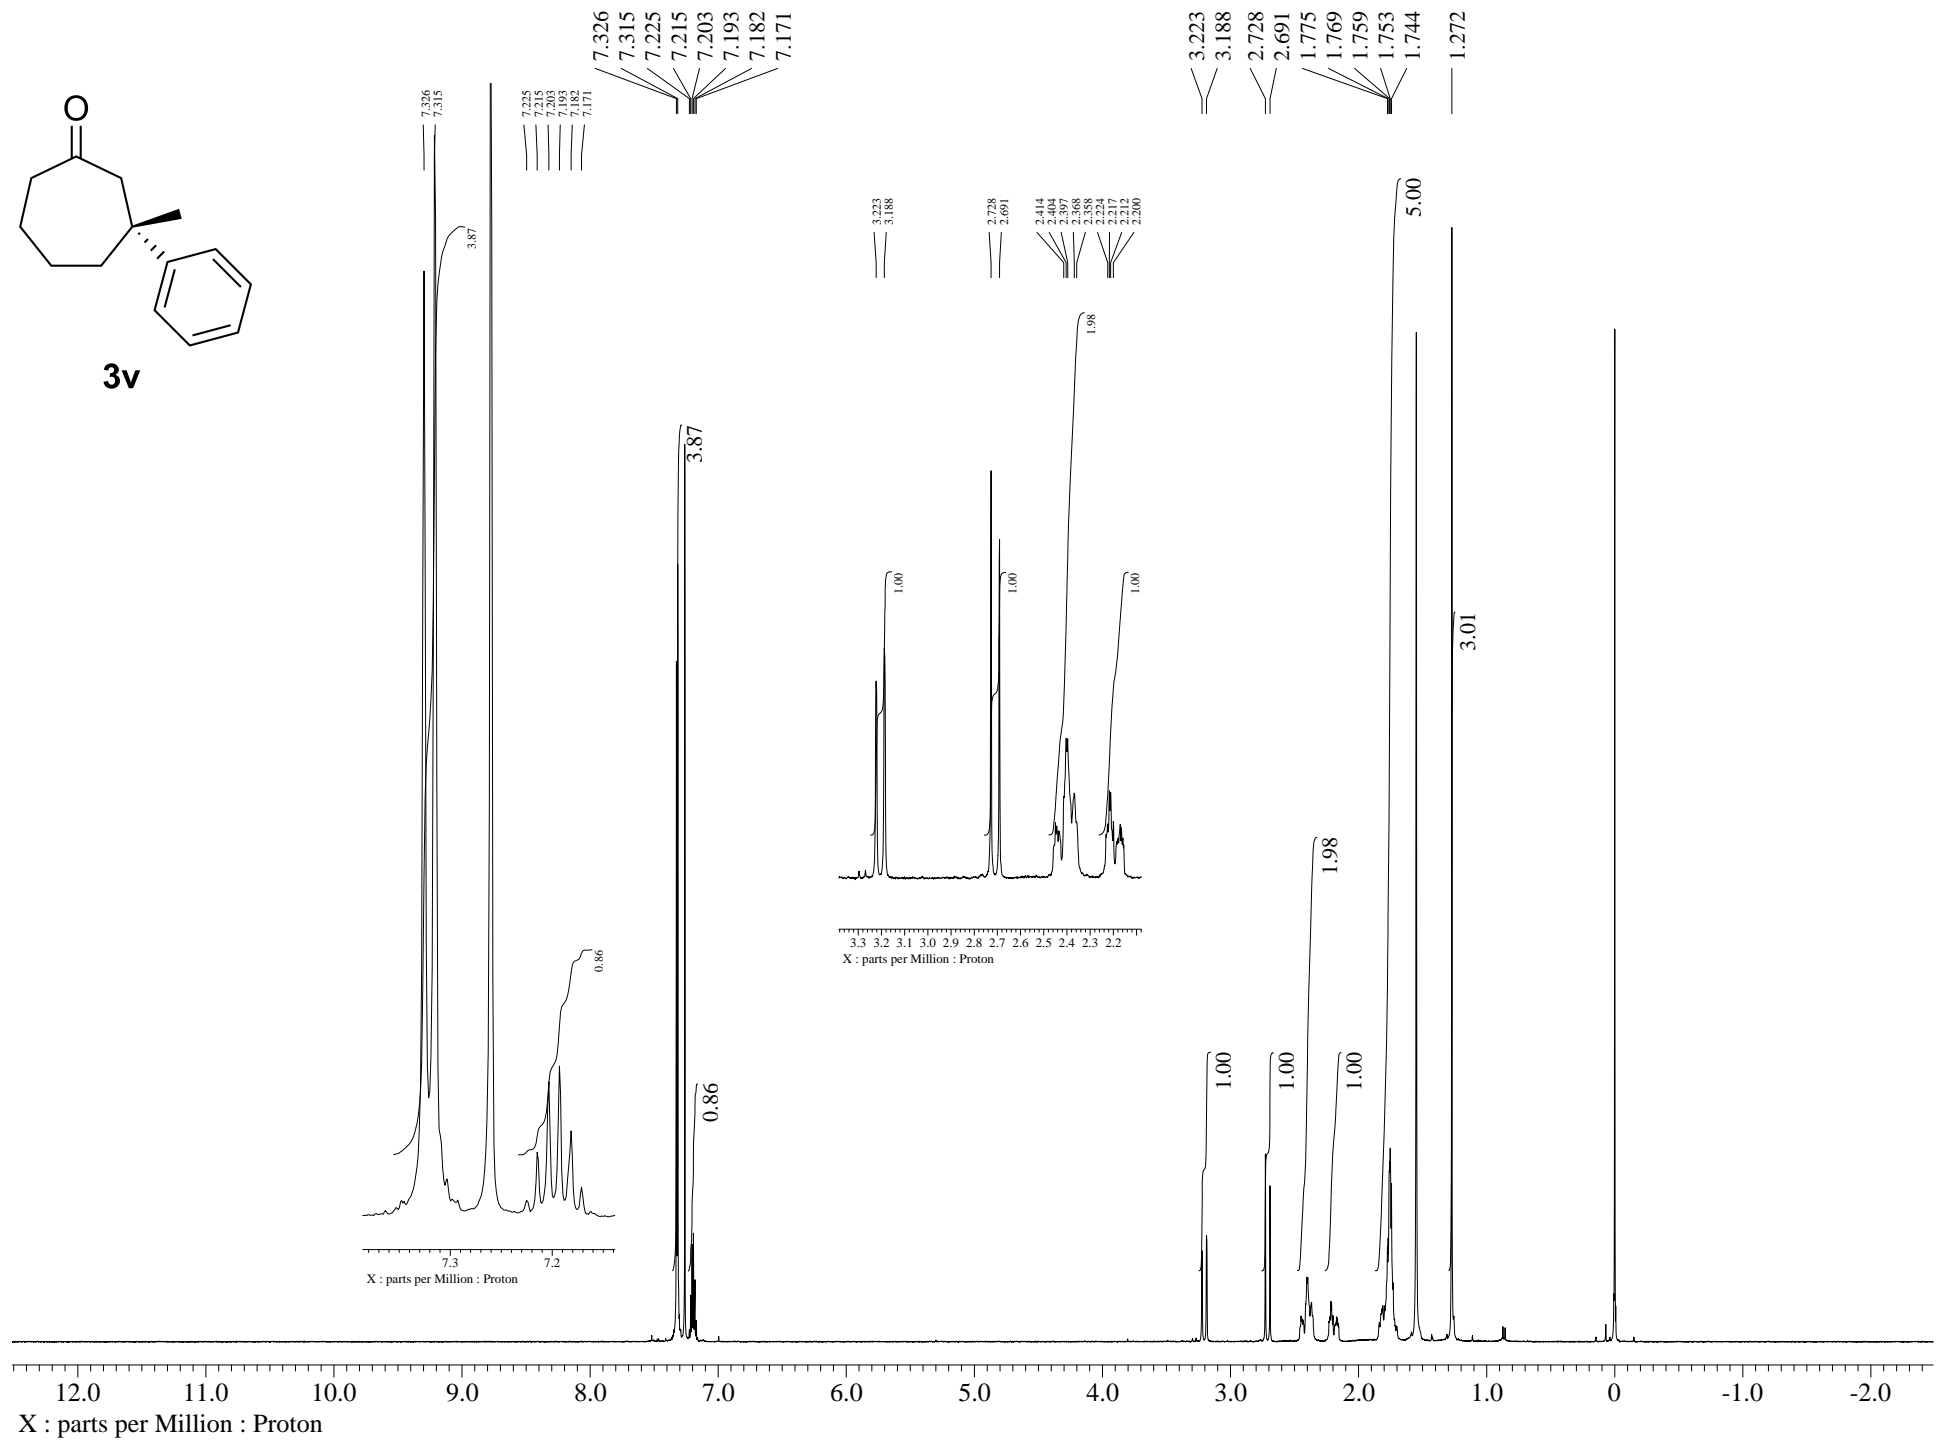

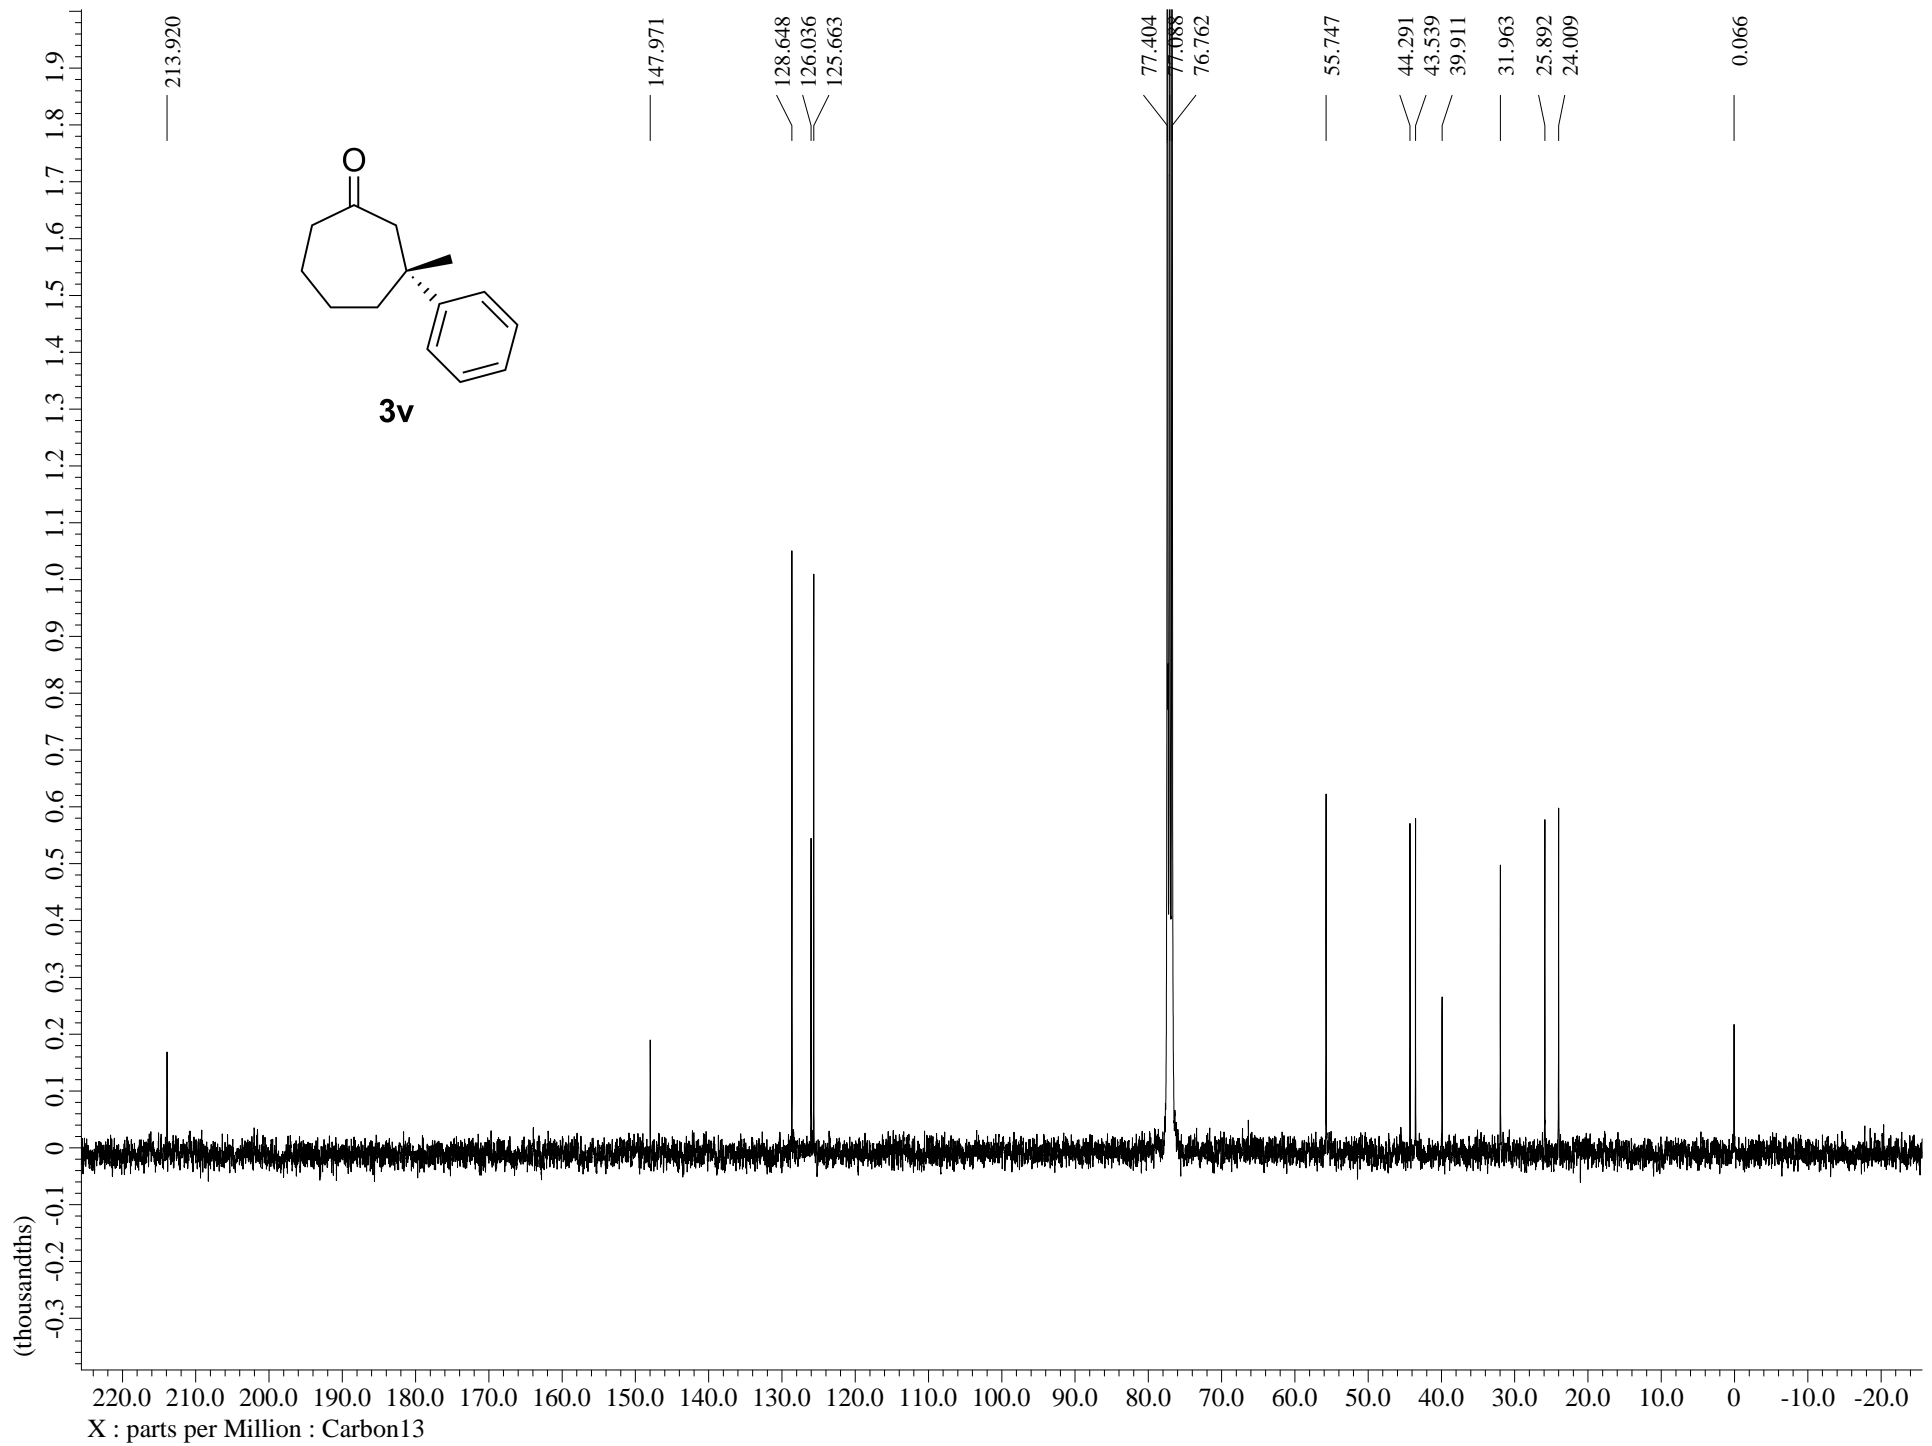

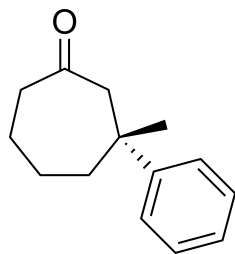

3v

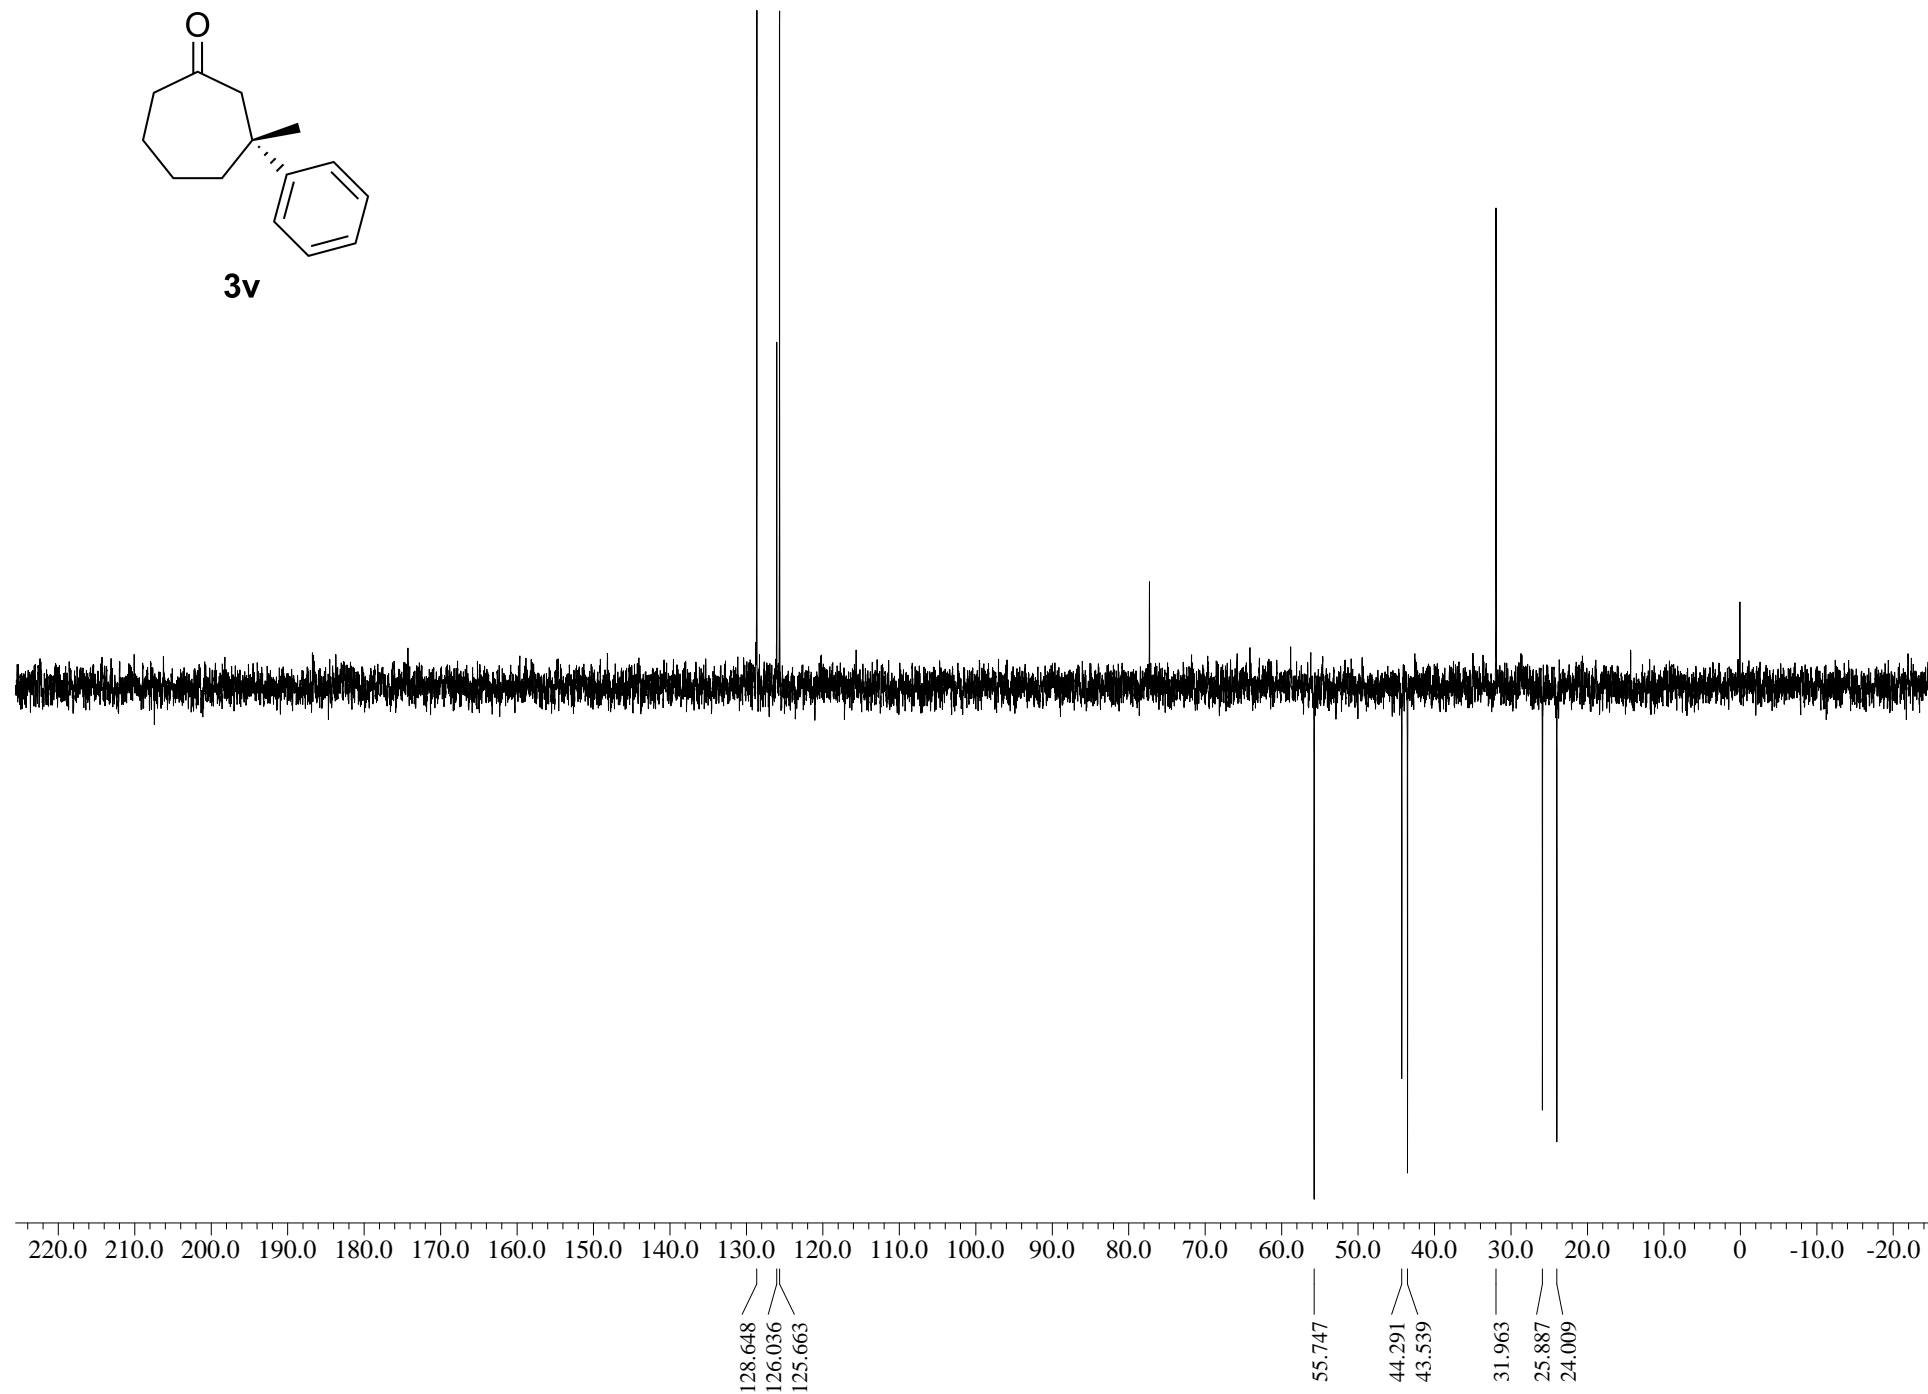



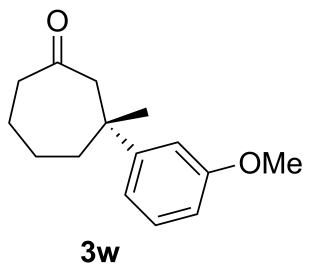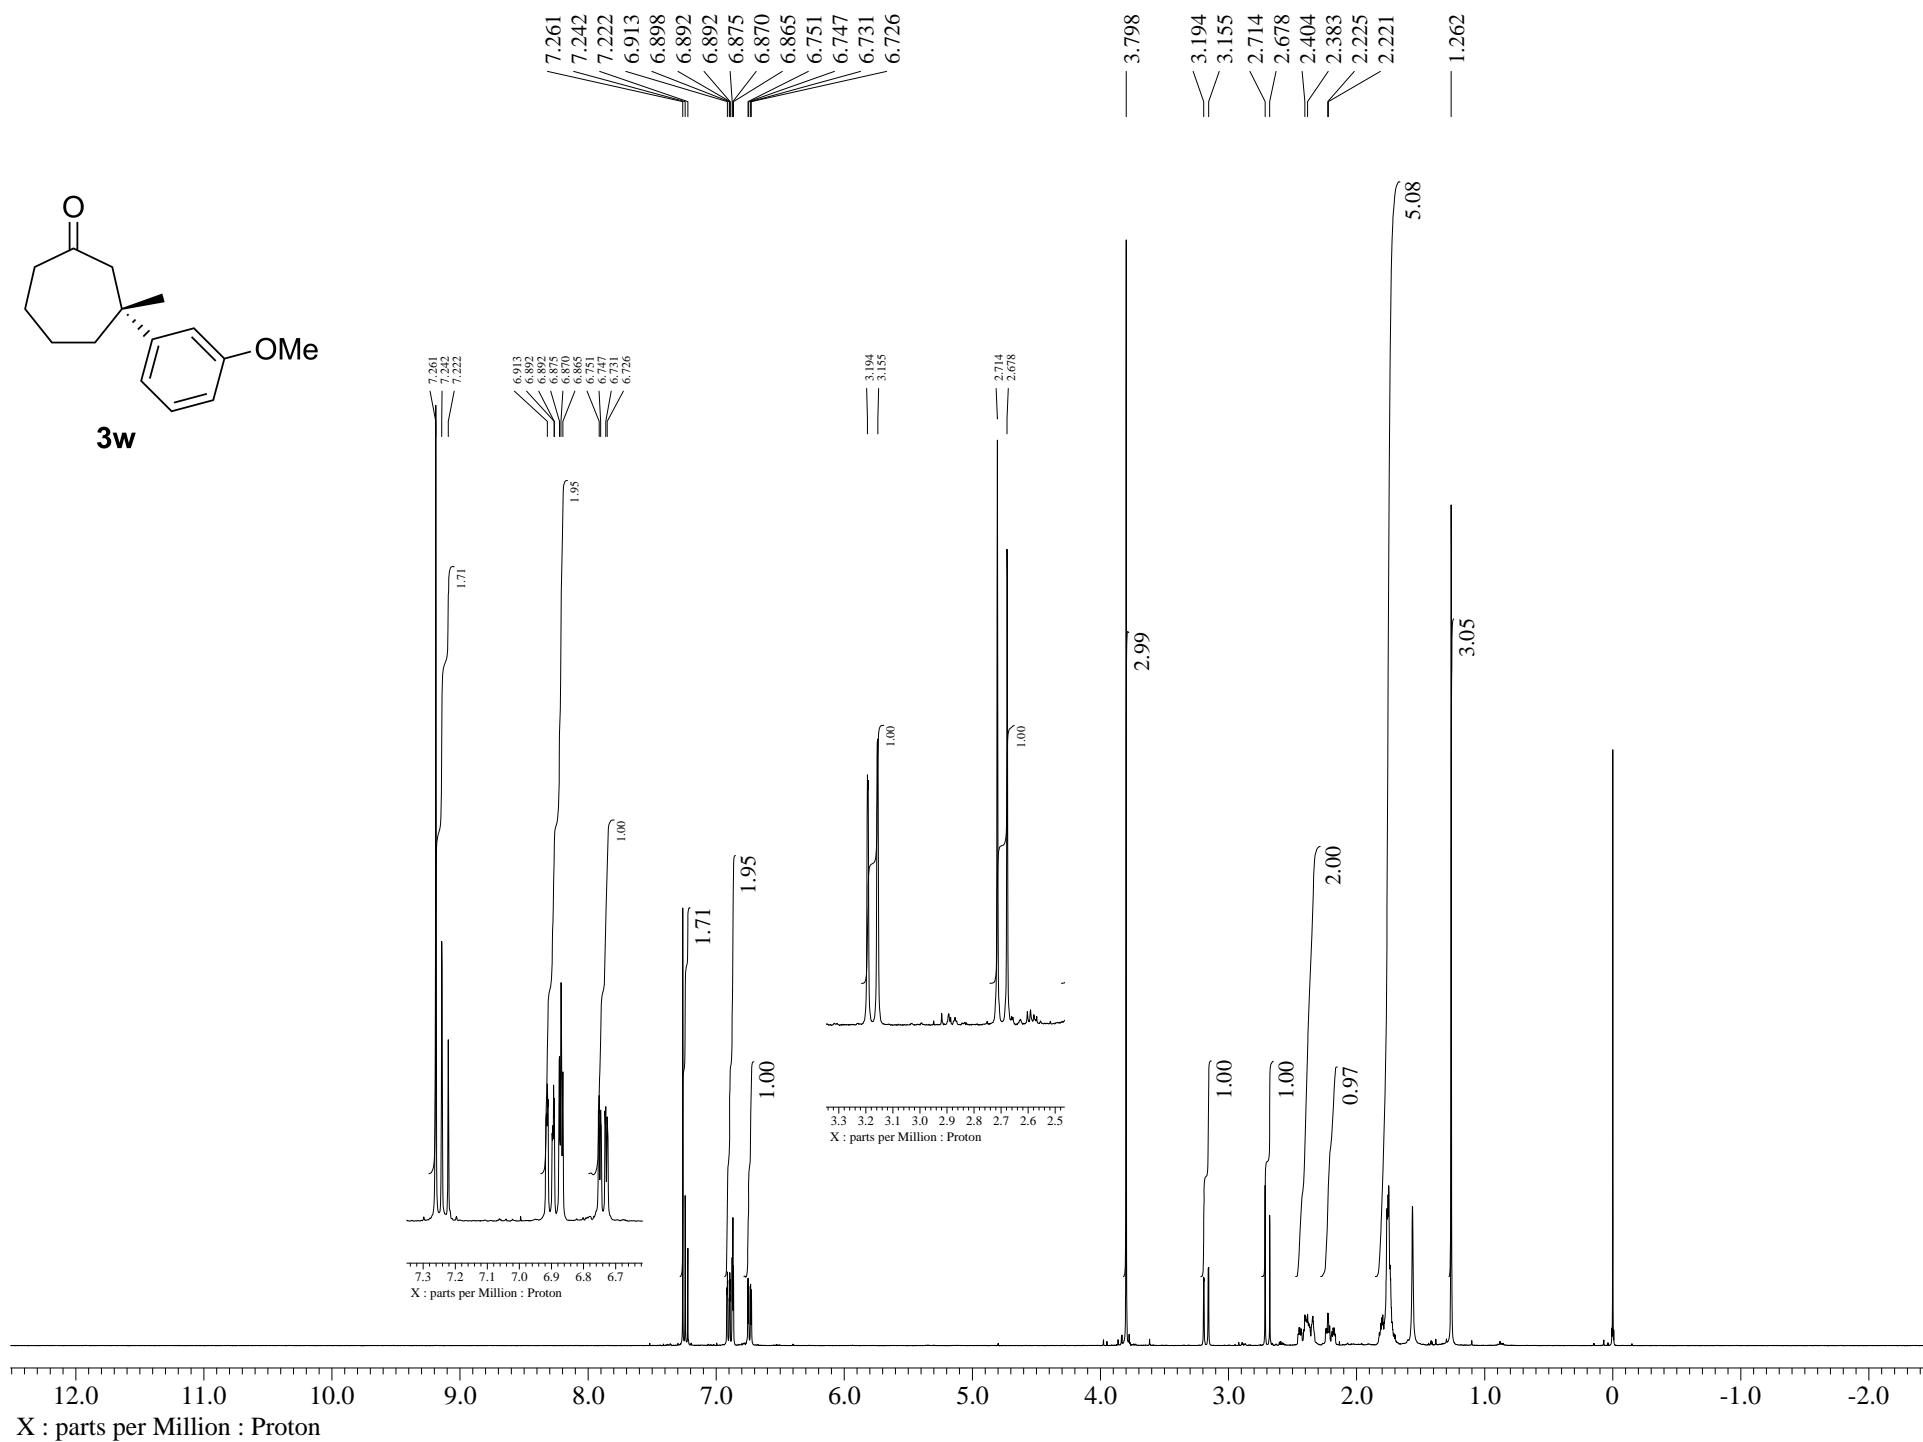

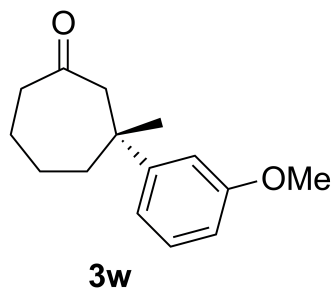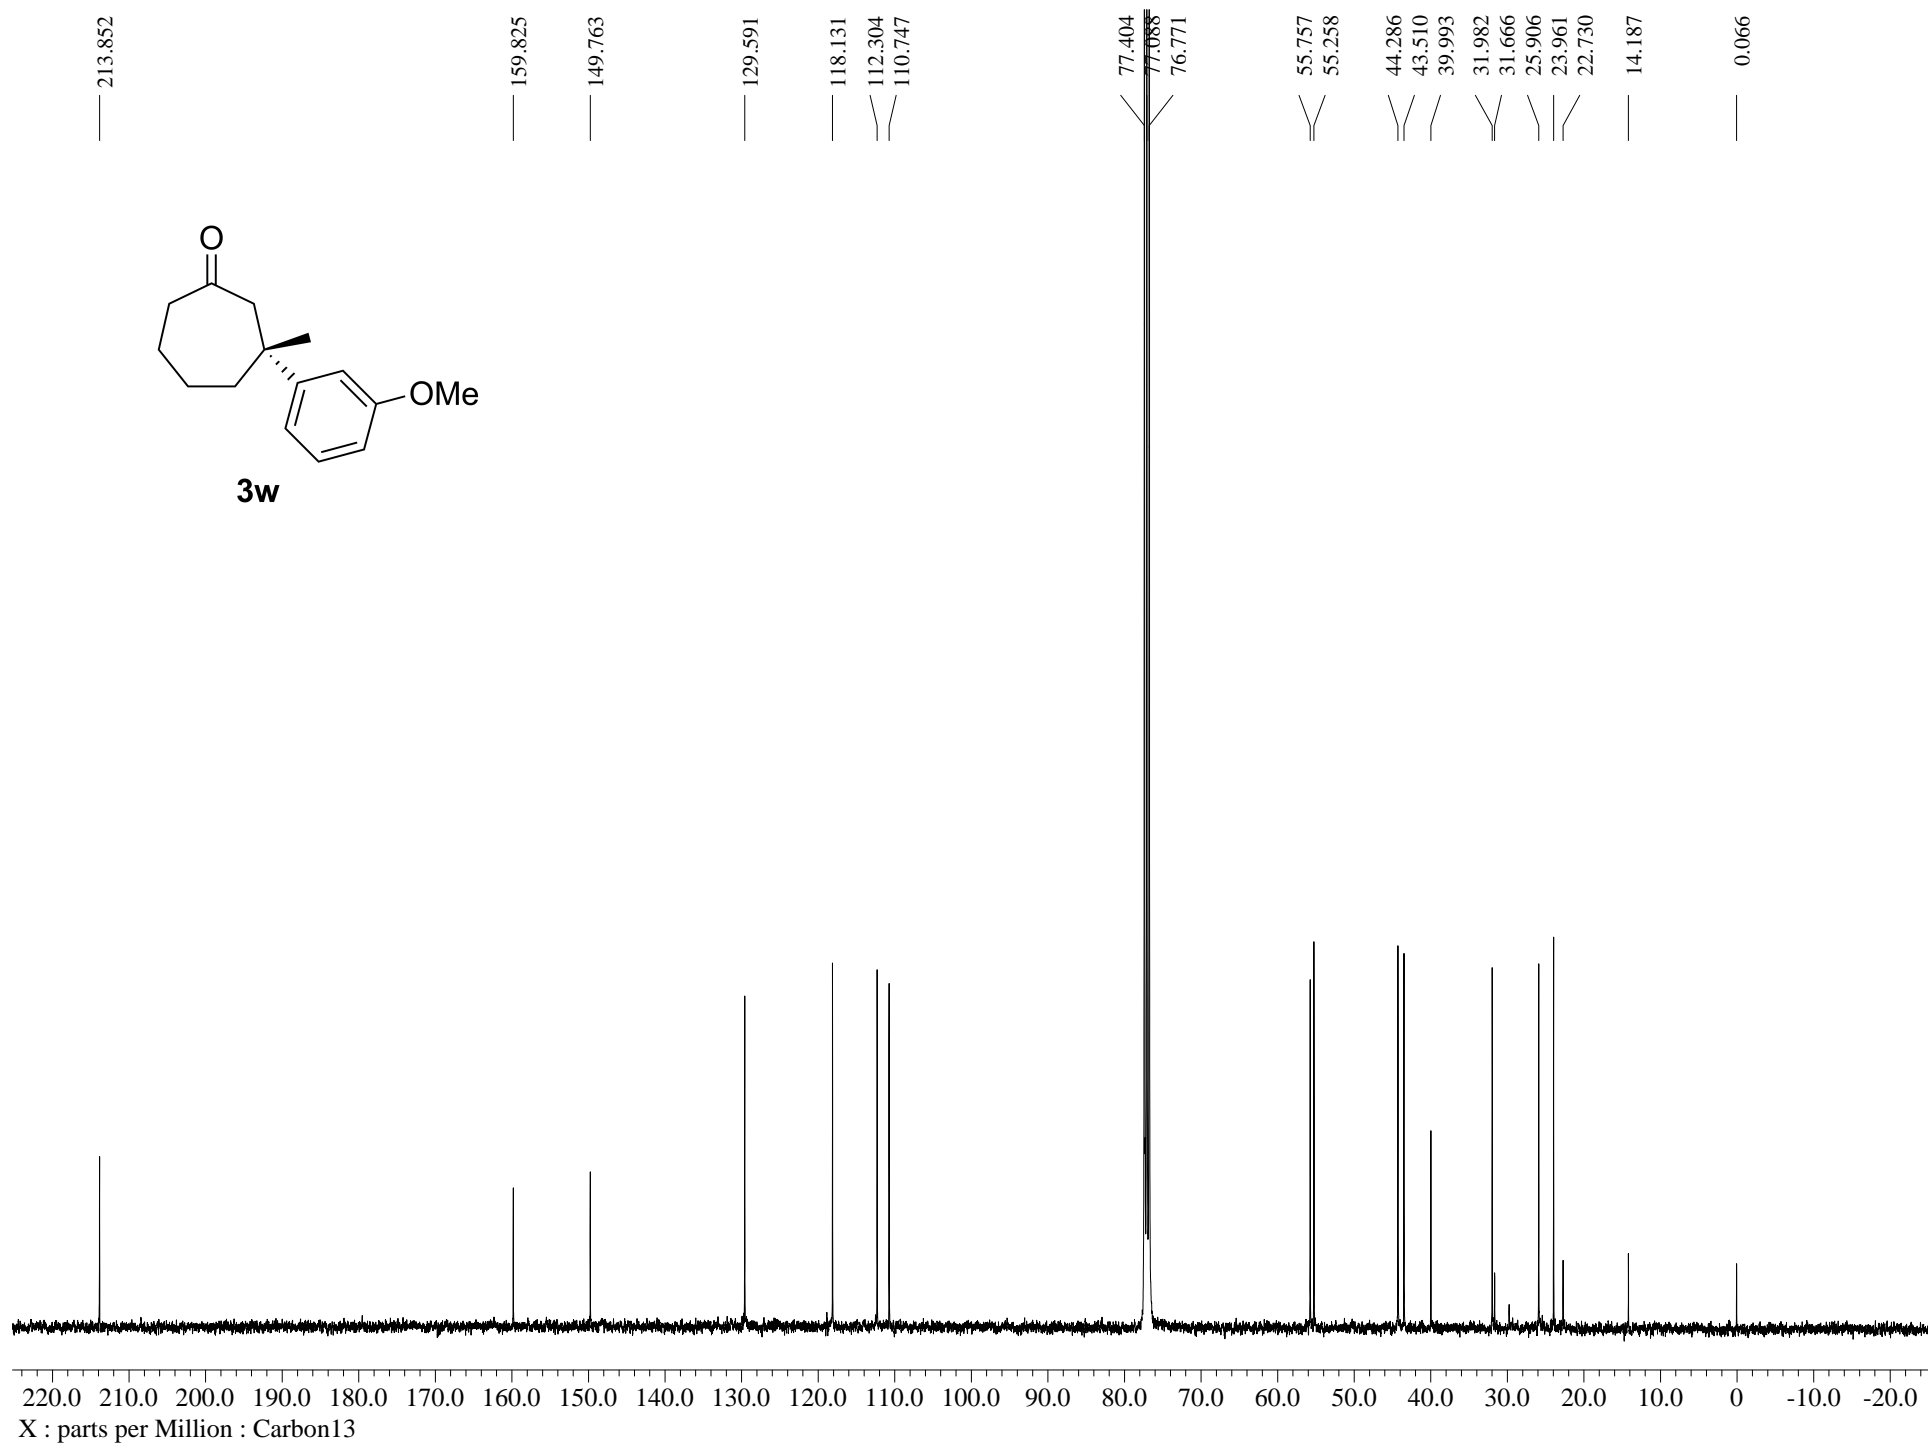

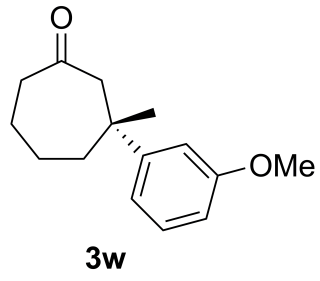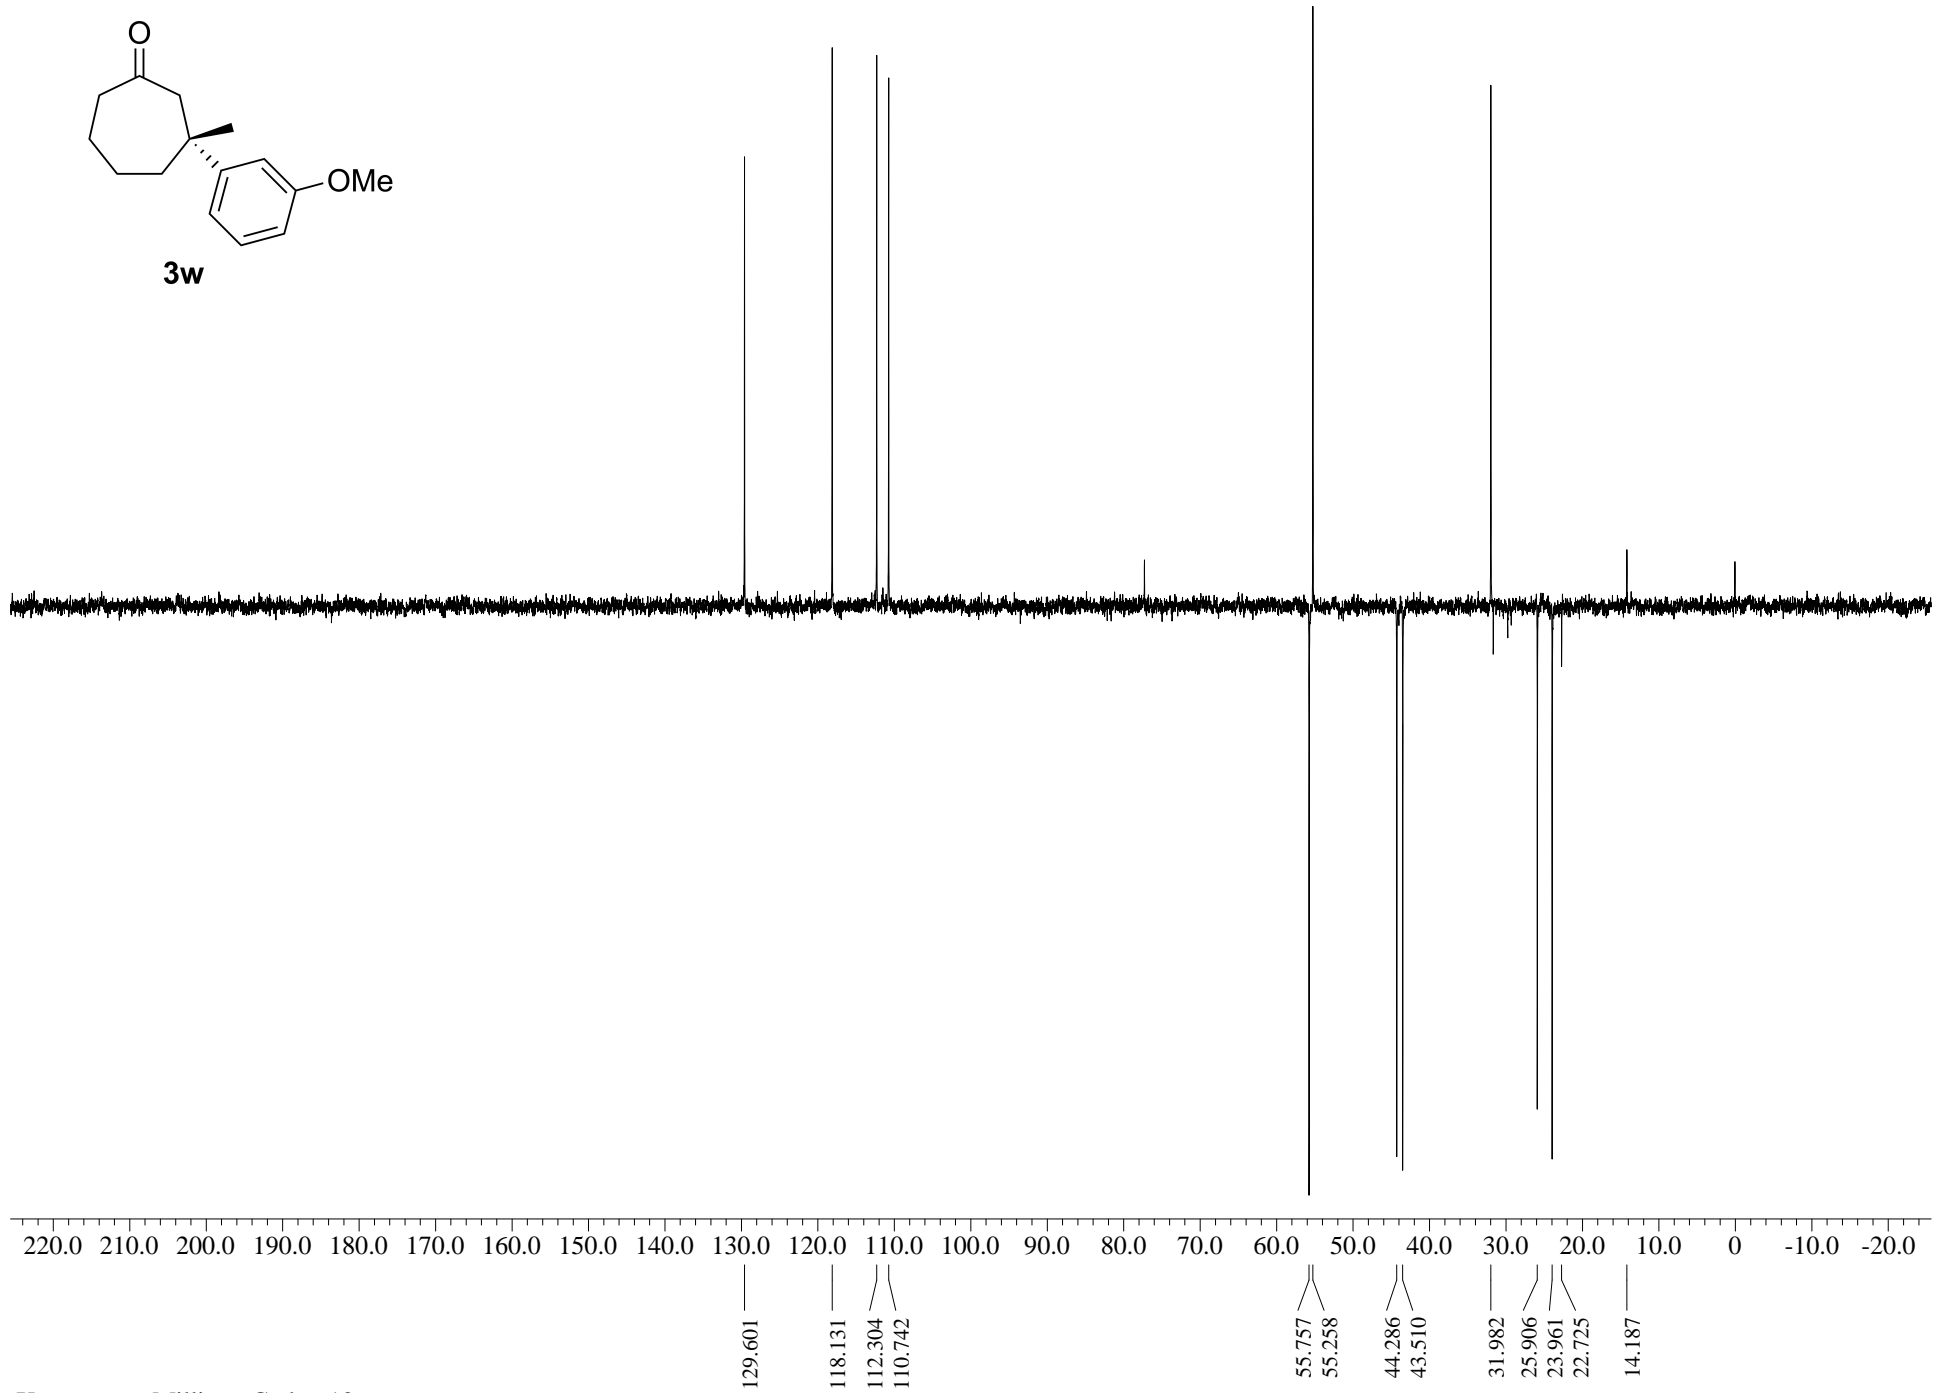

X : parts per Million : Carbon13

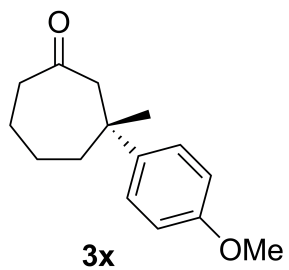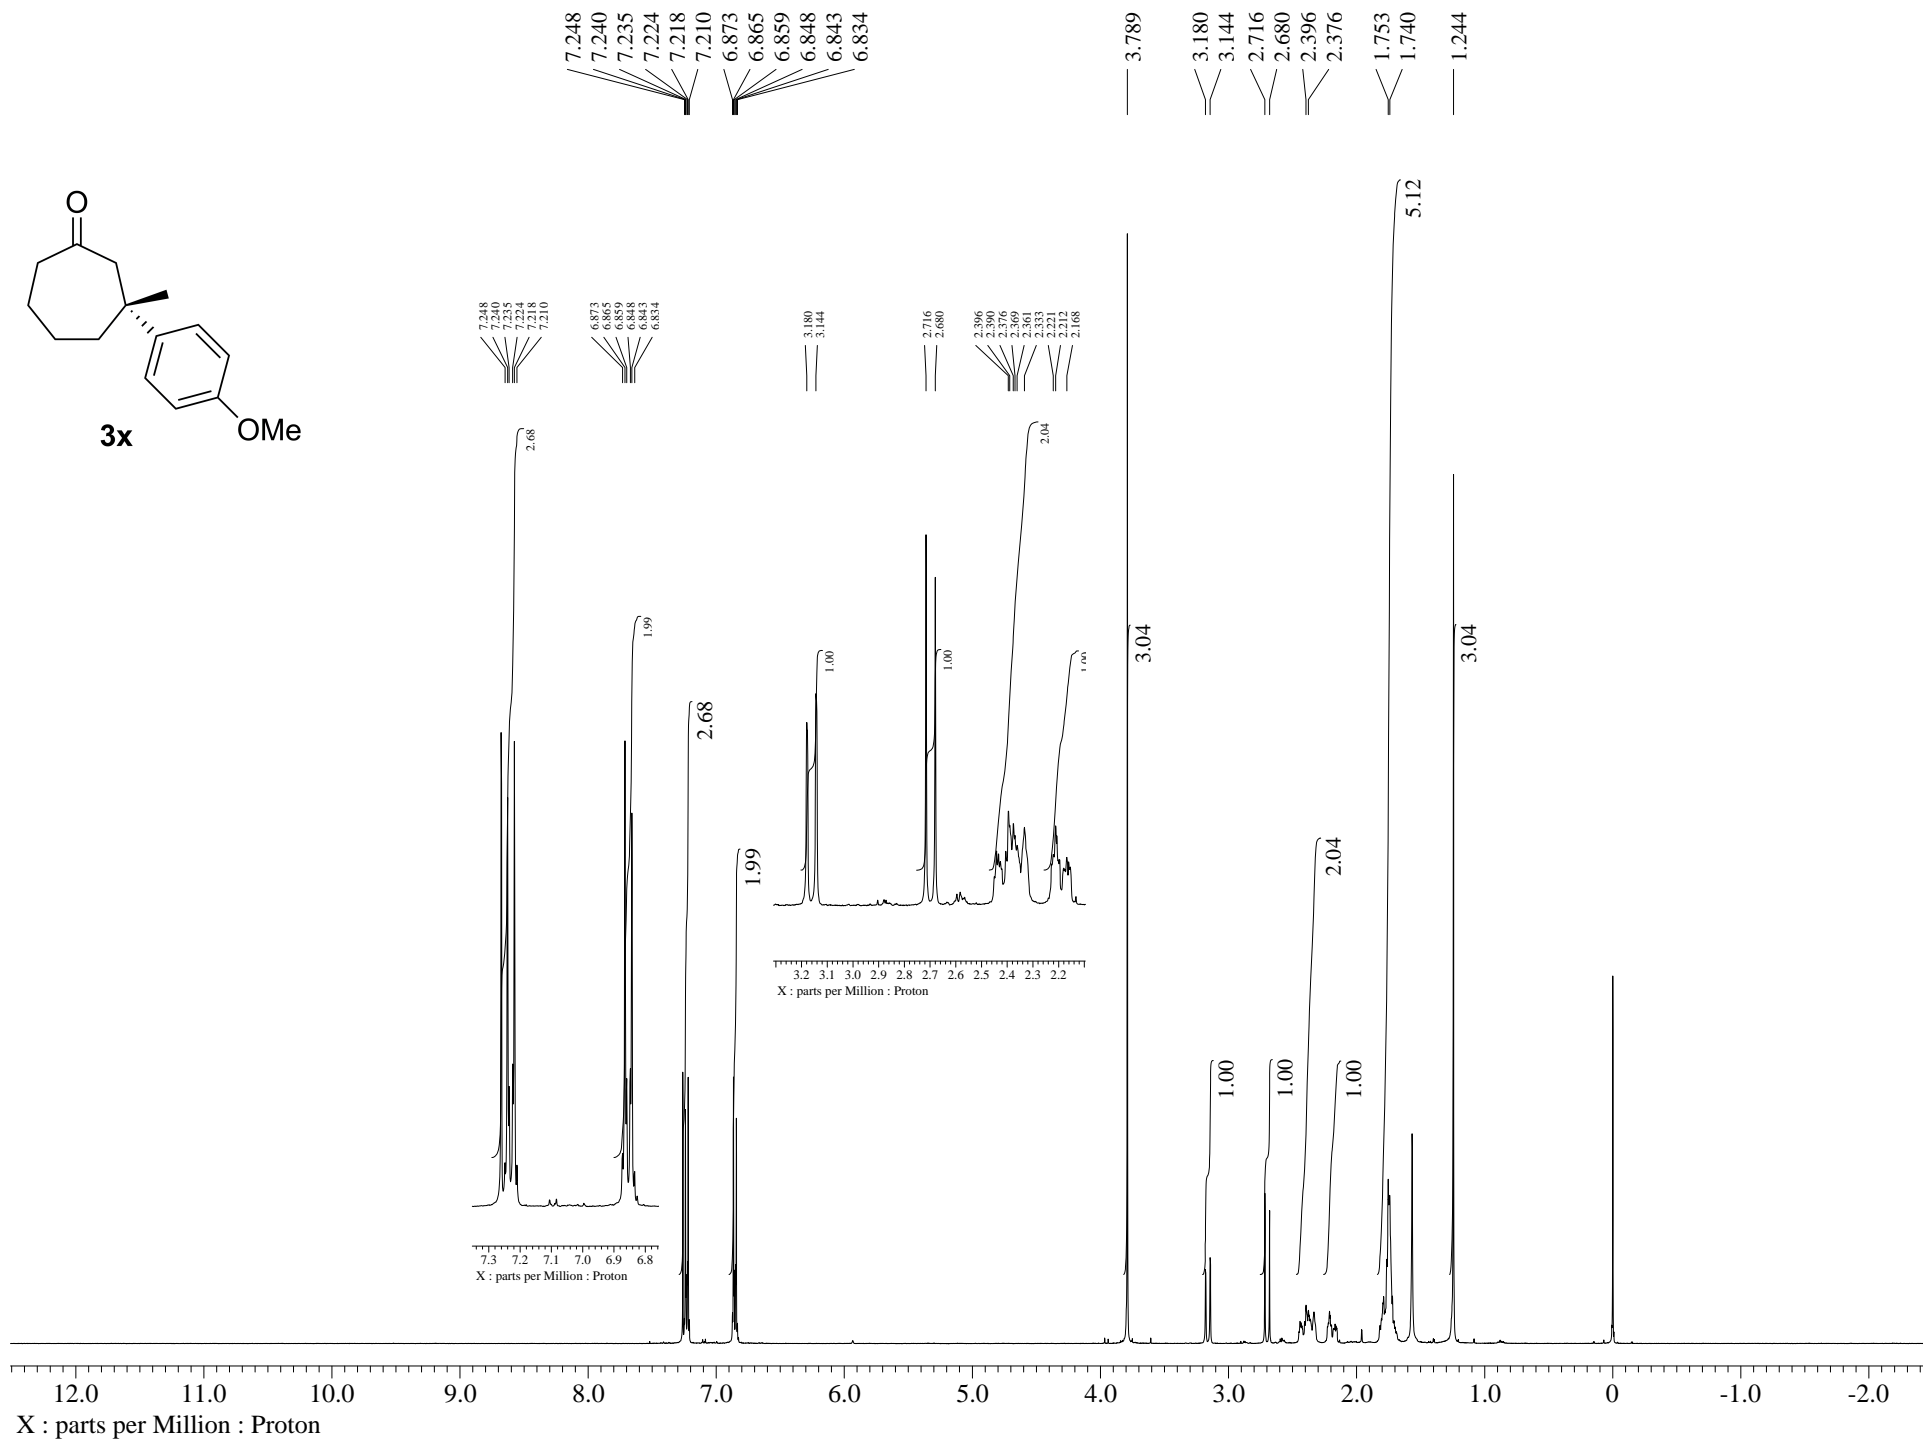

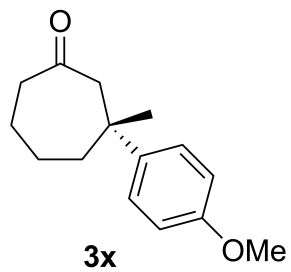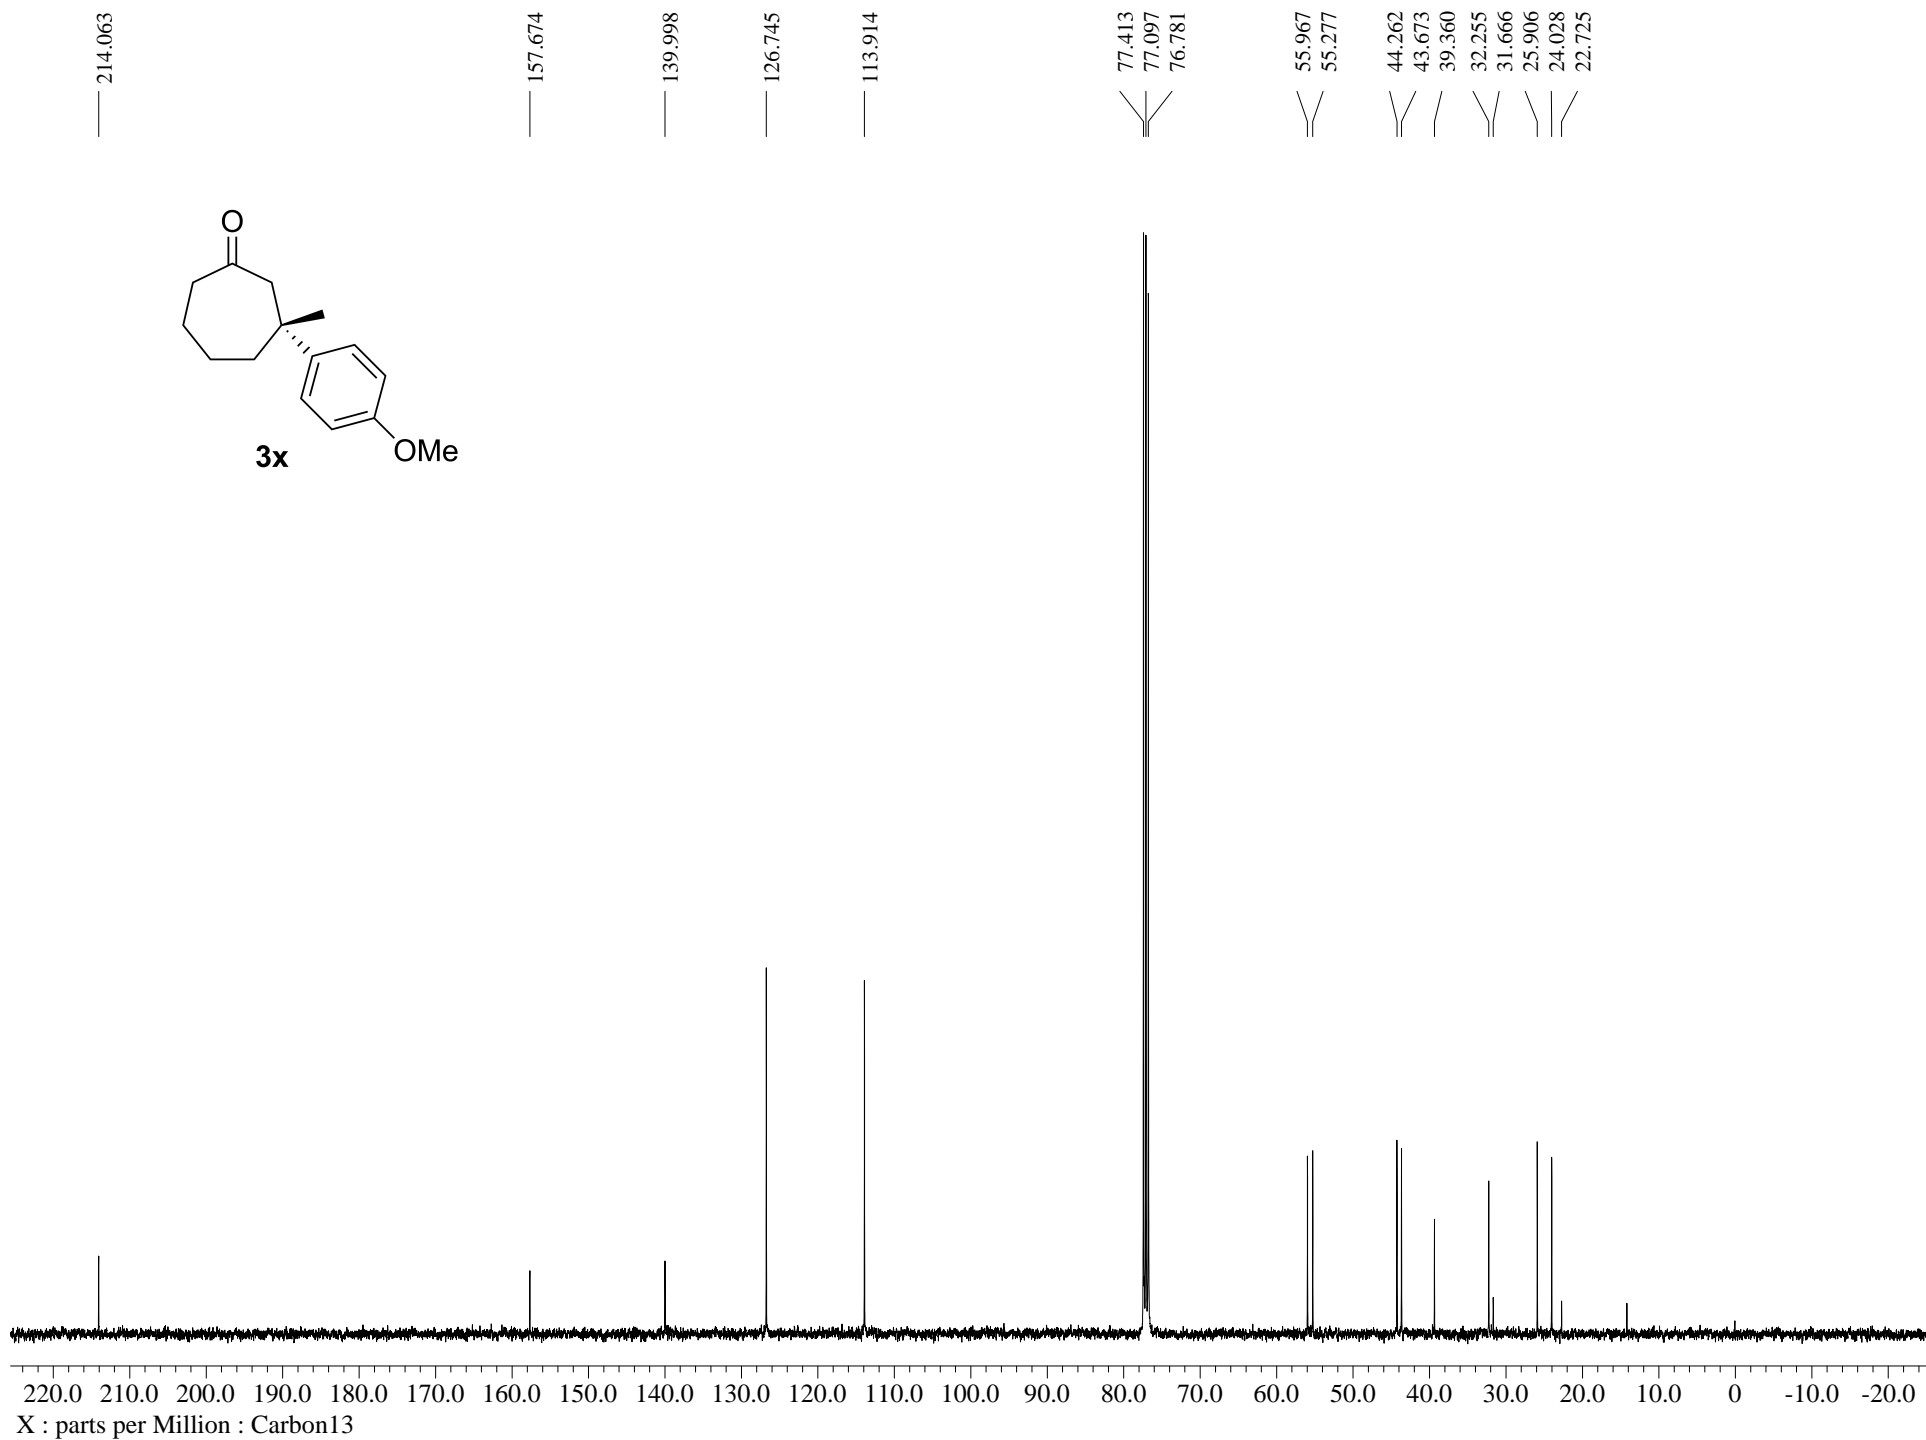

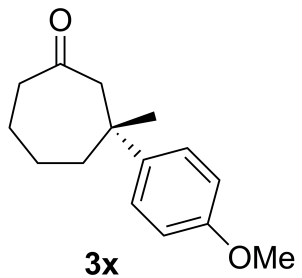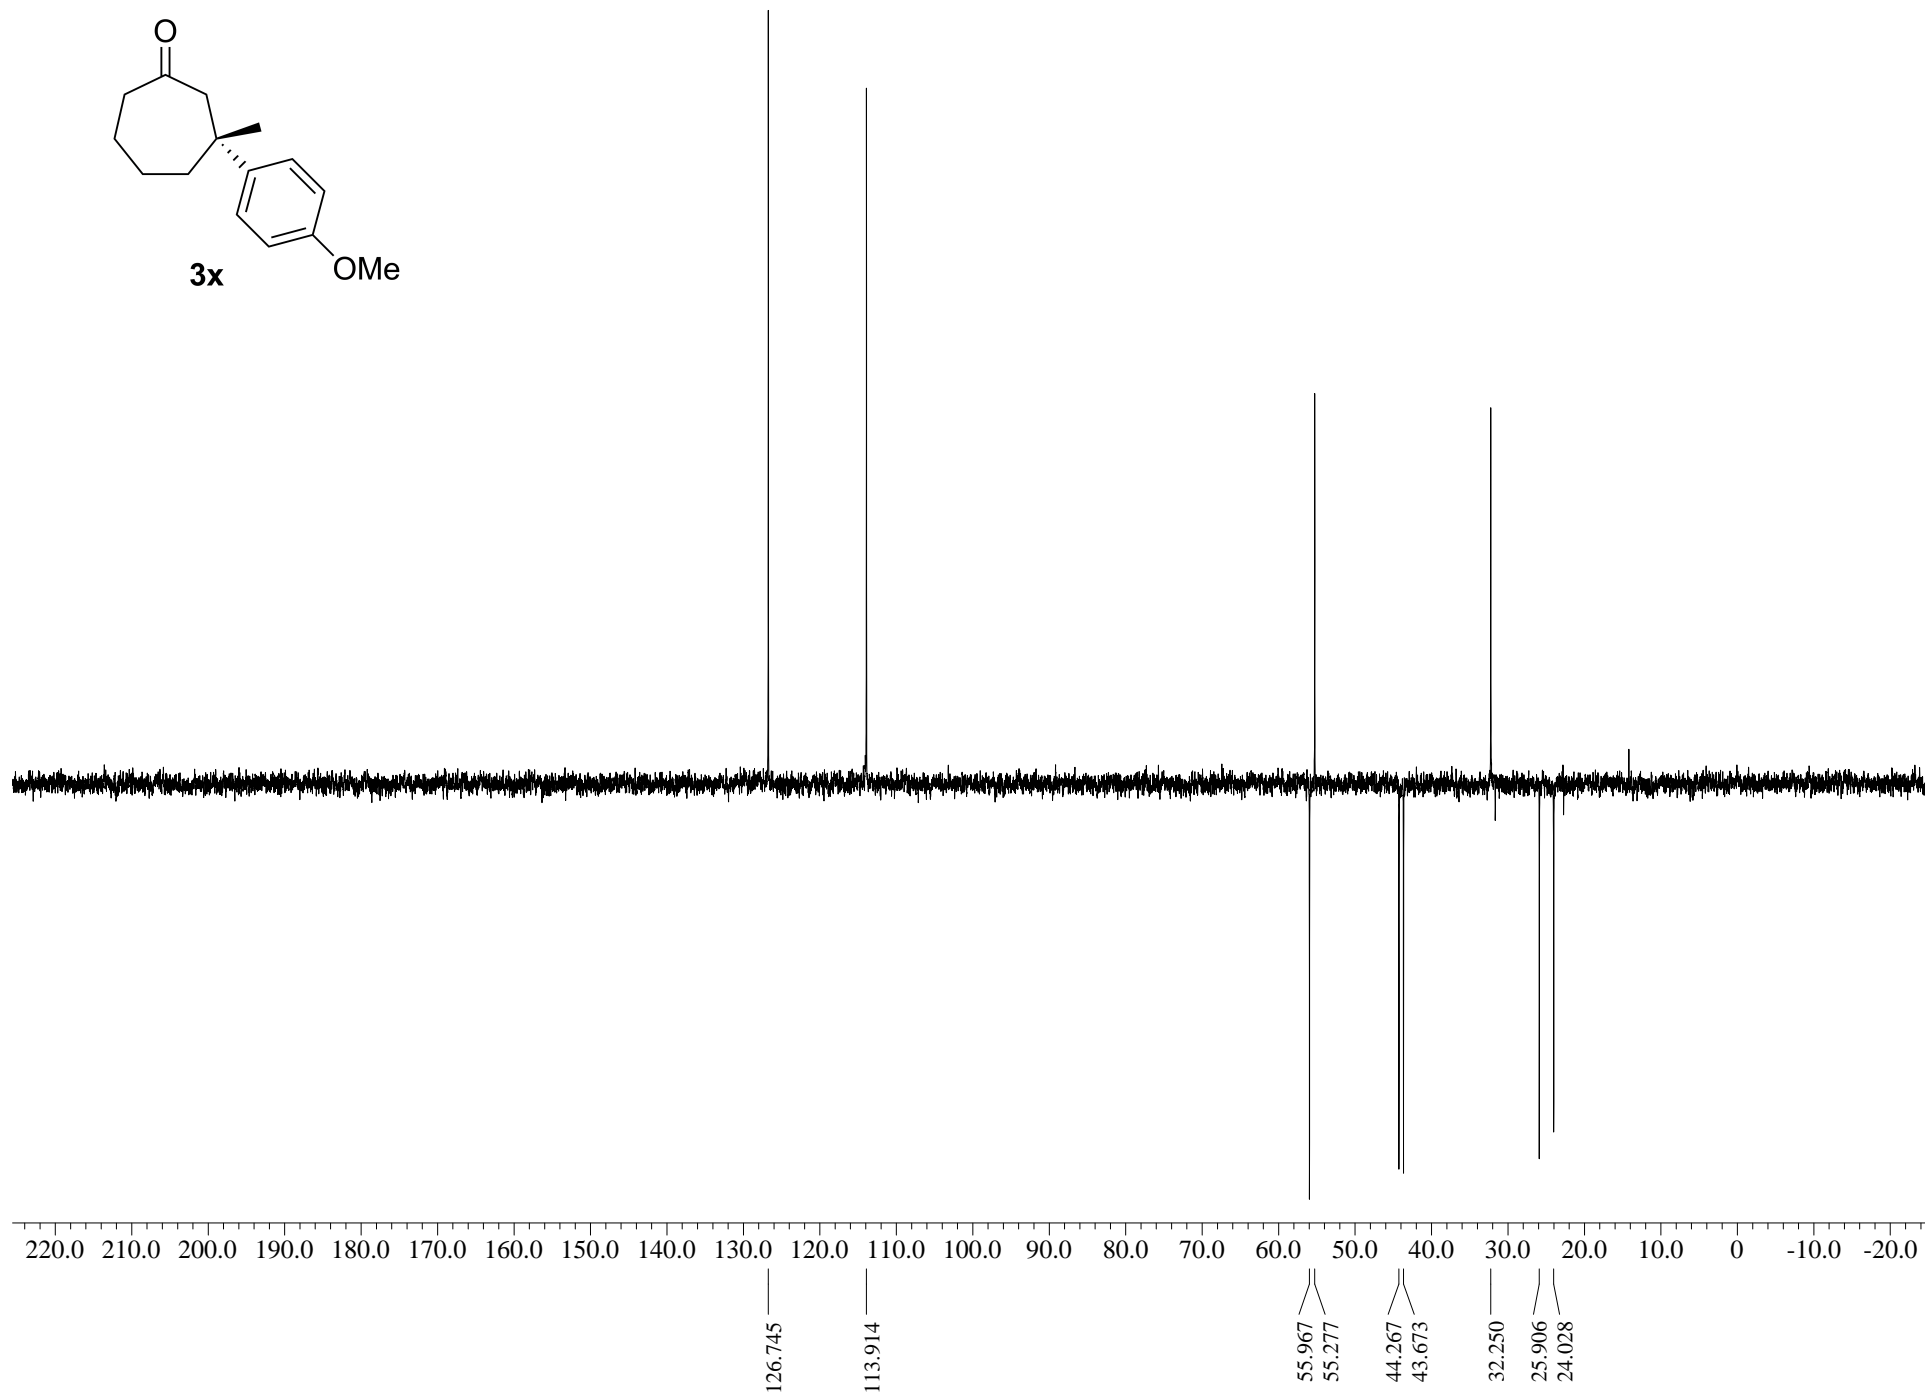

X : parts per Million : Carbon13

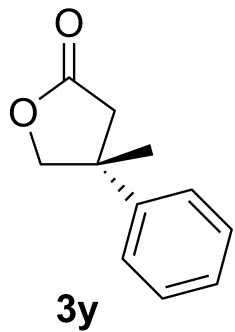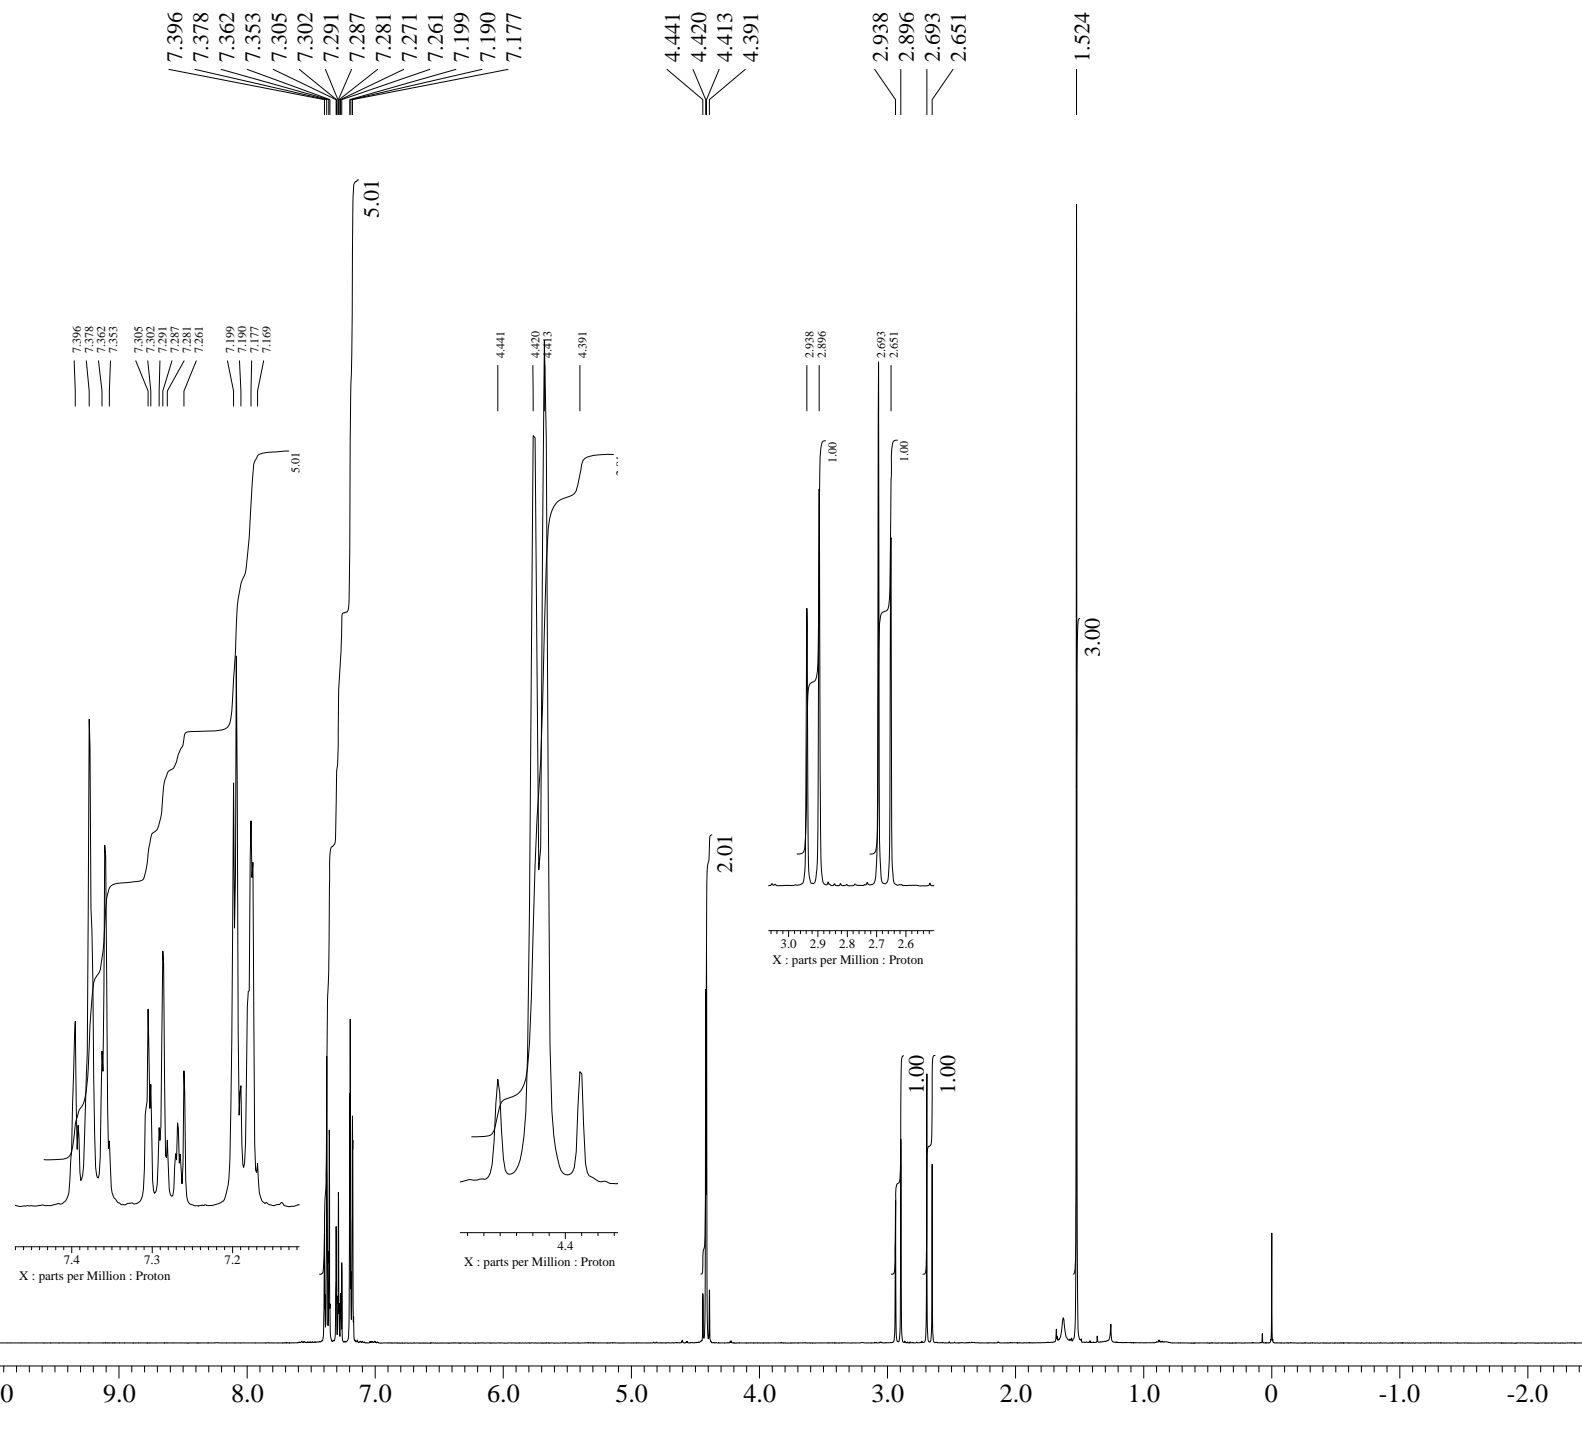

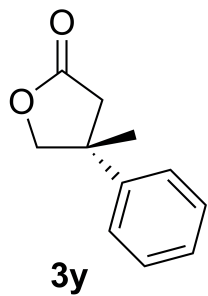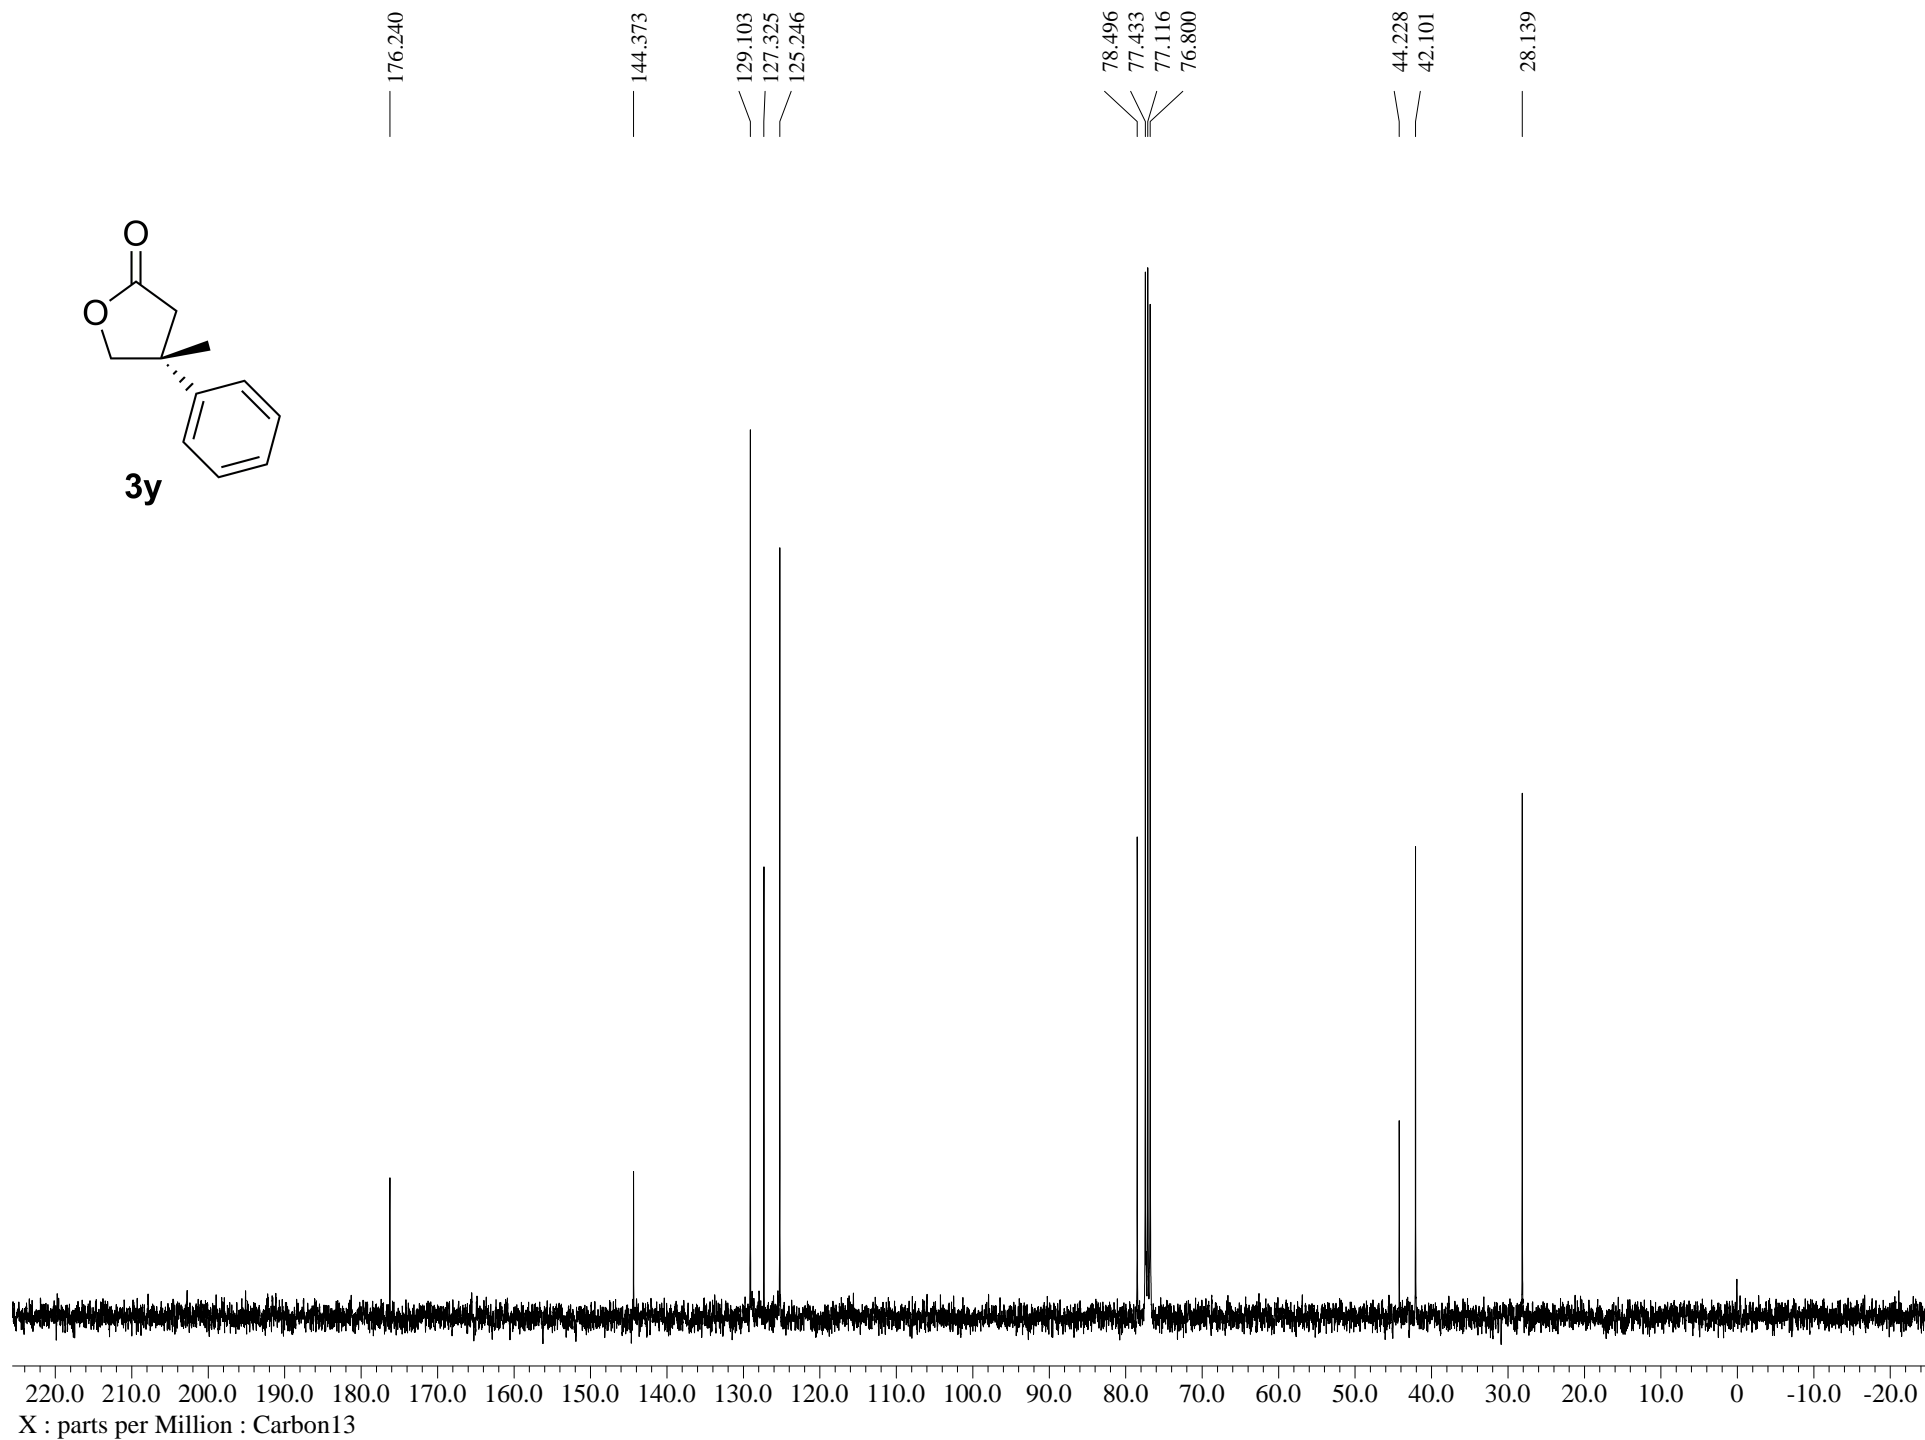



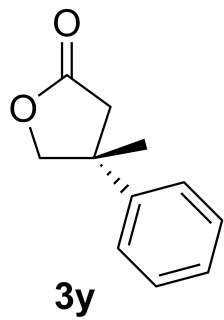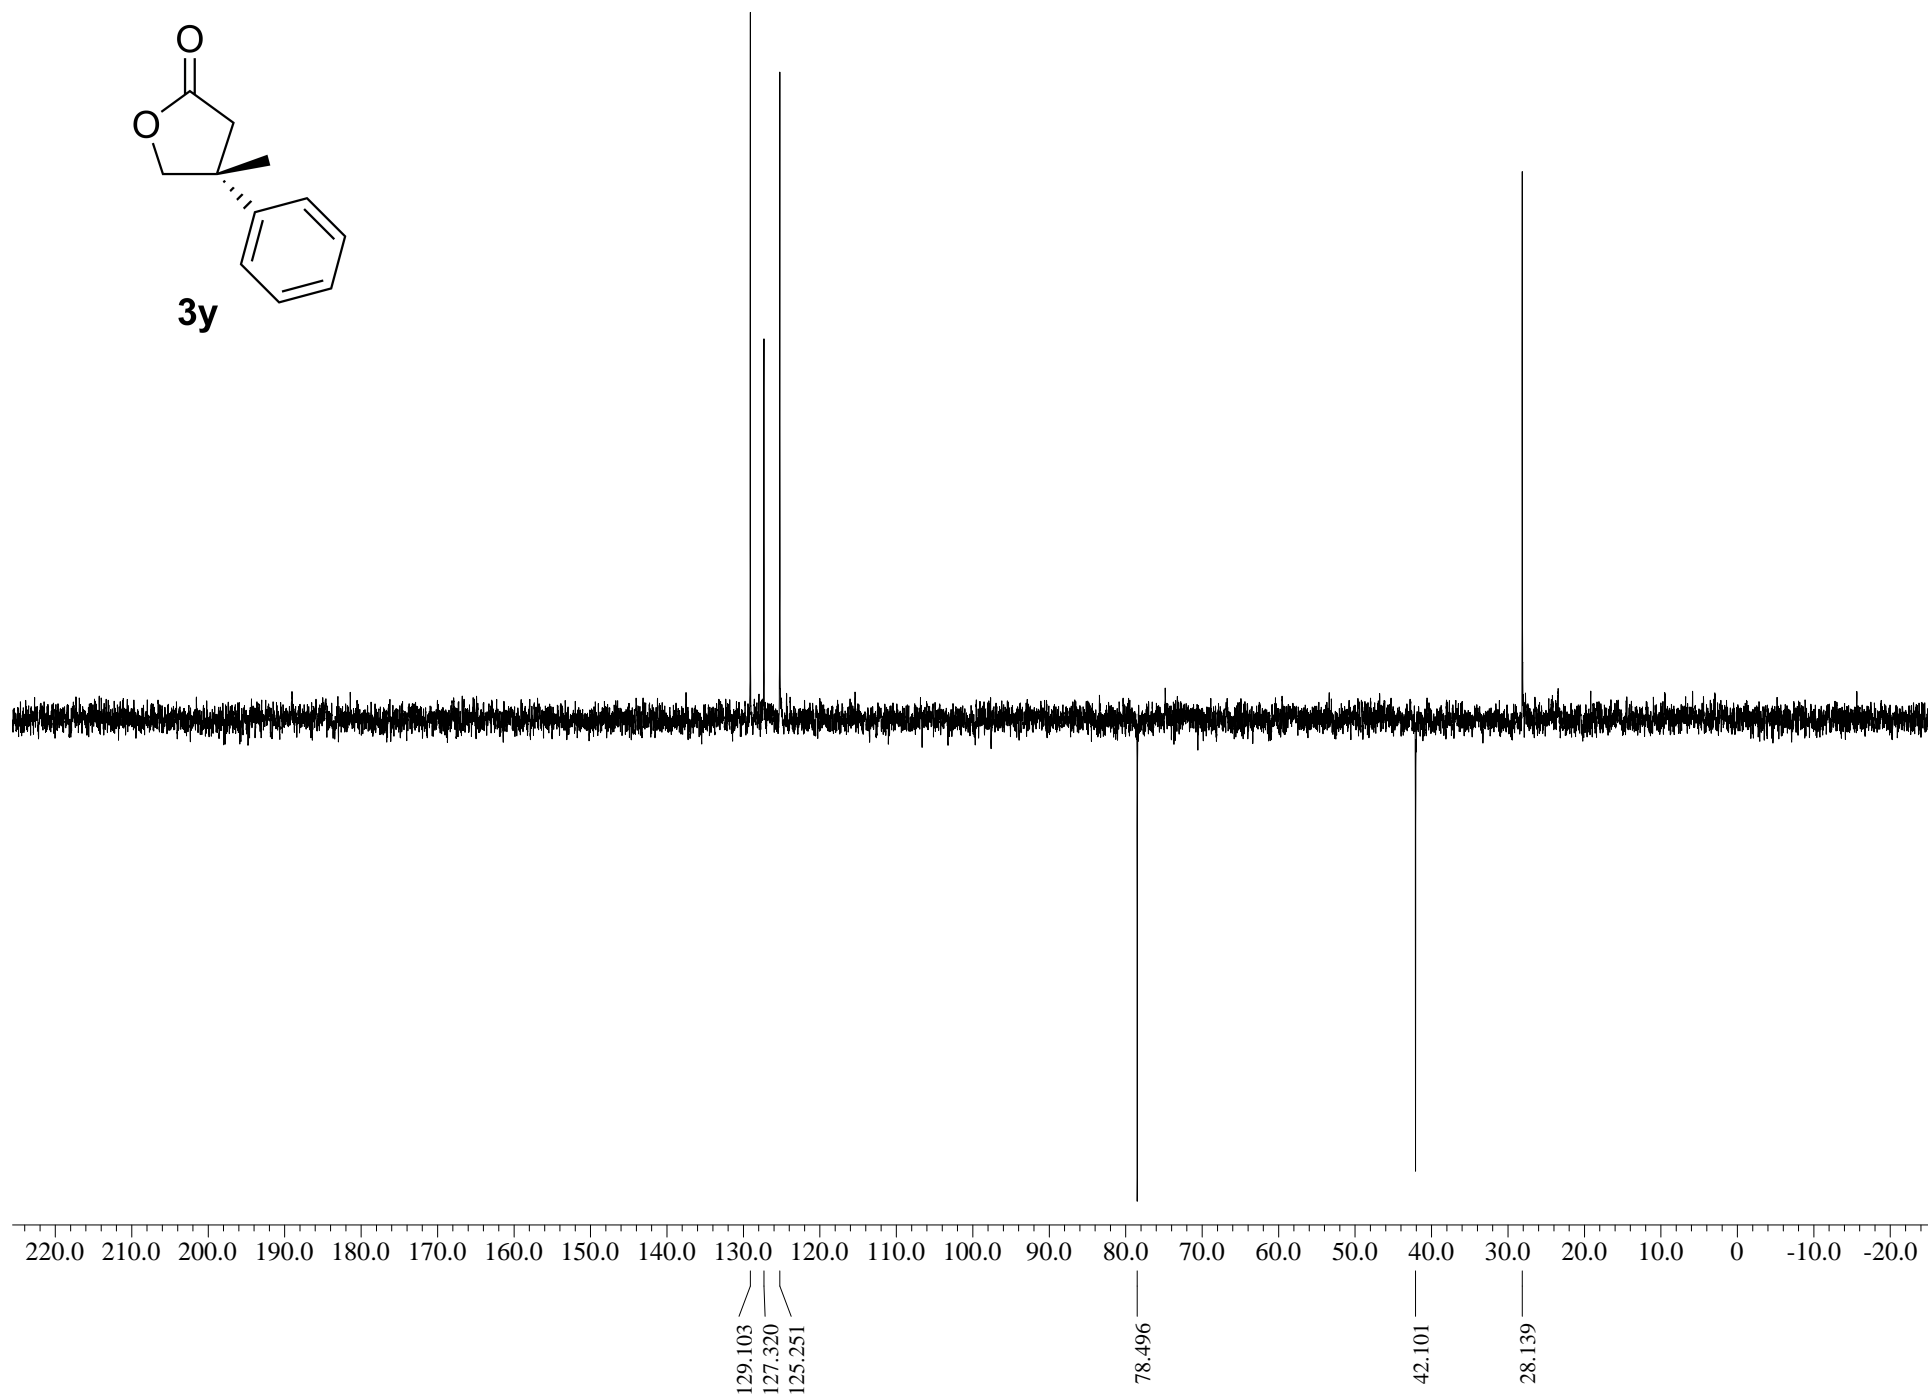

X : parts per Million : Carbon13

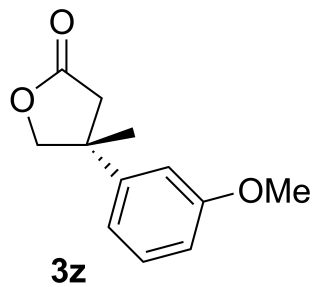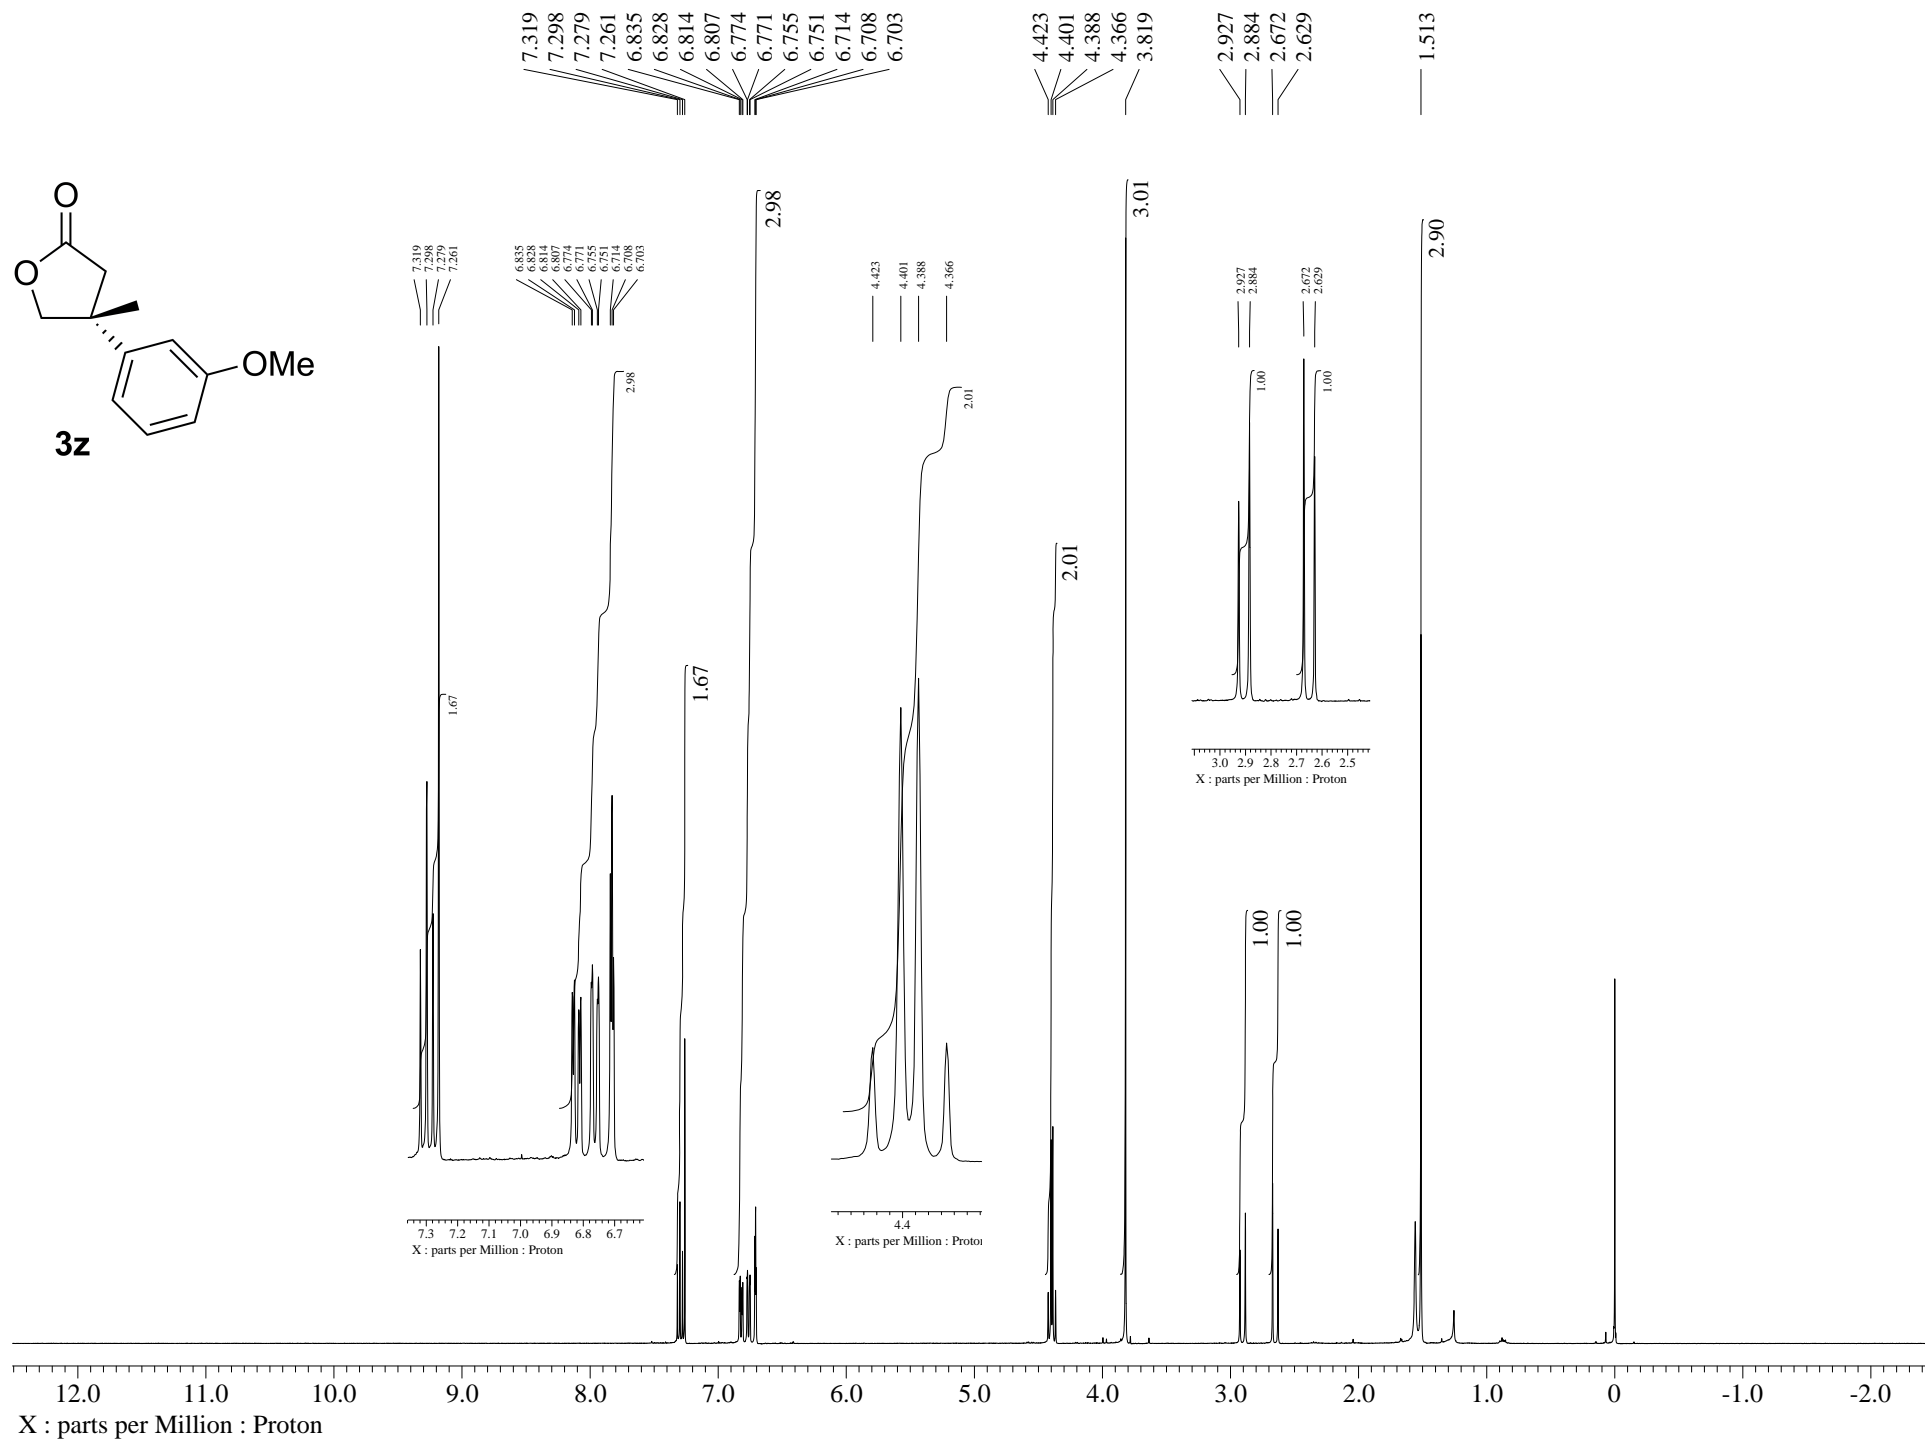

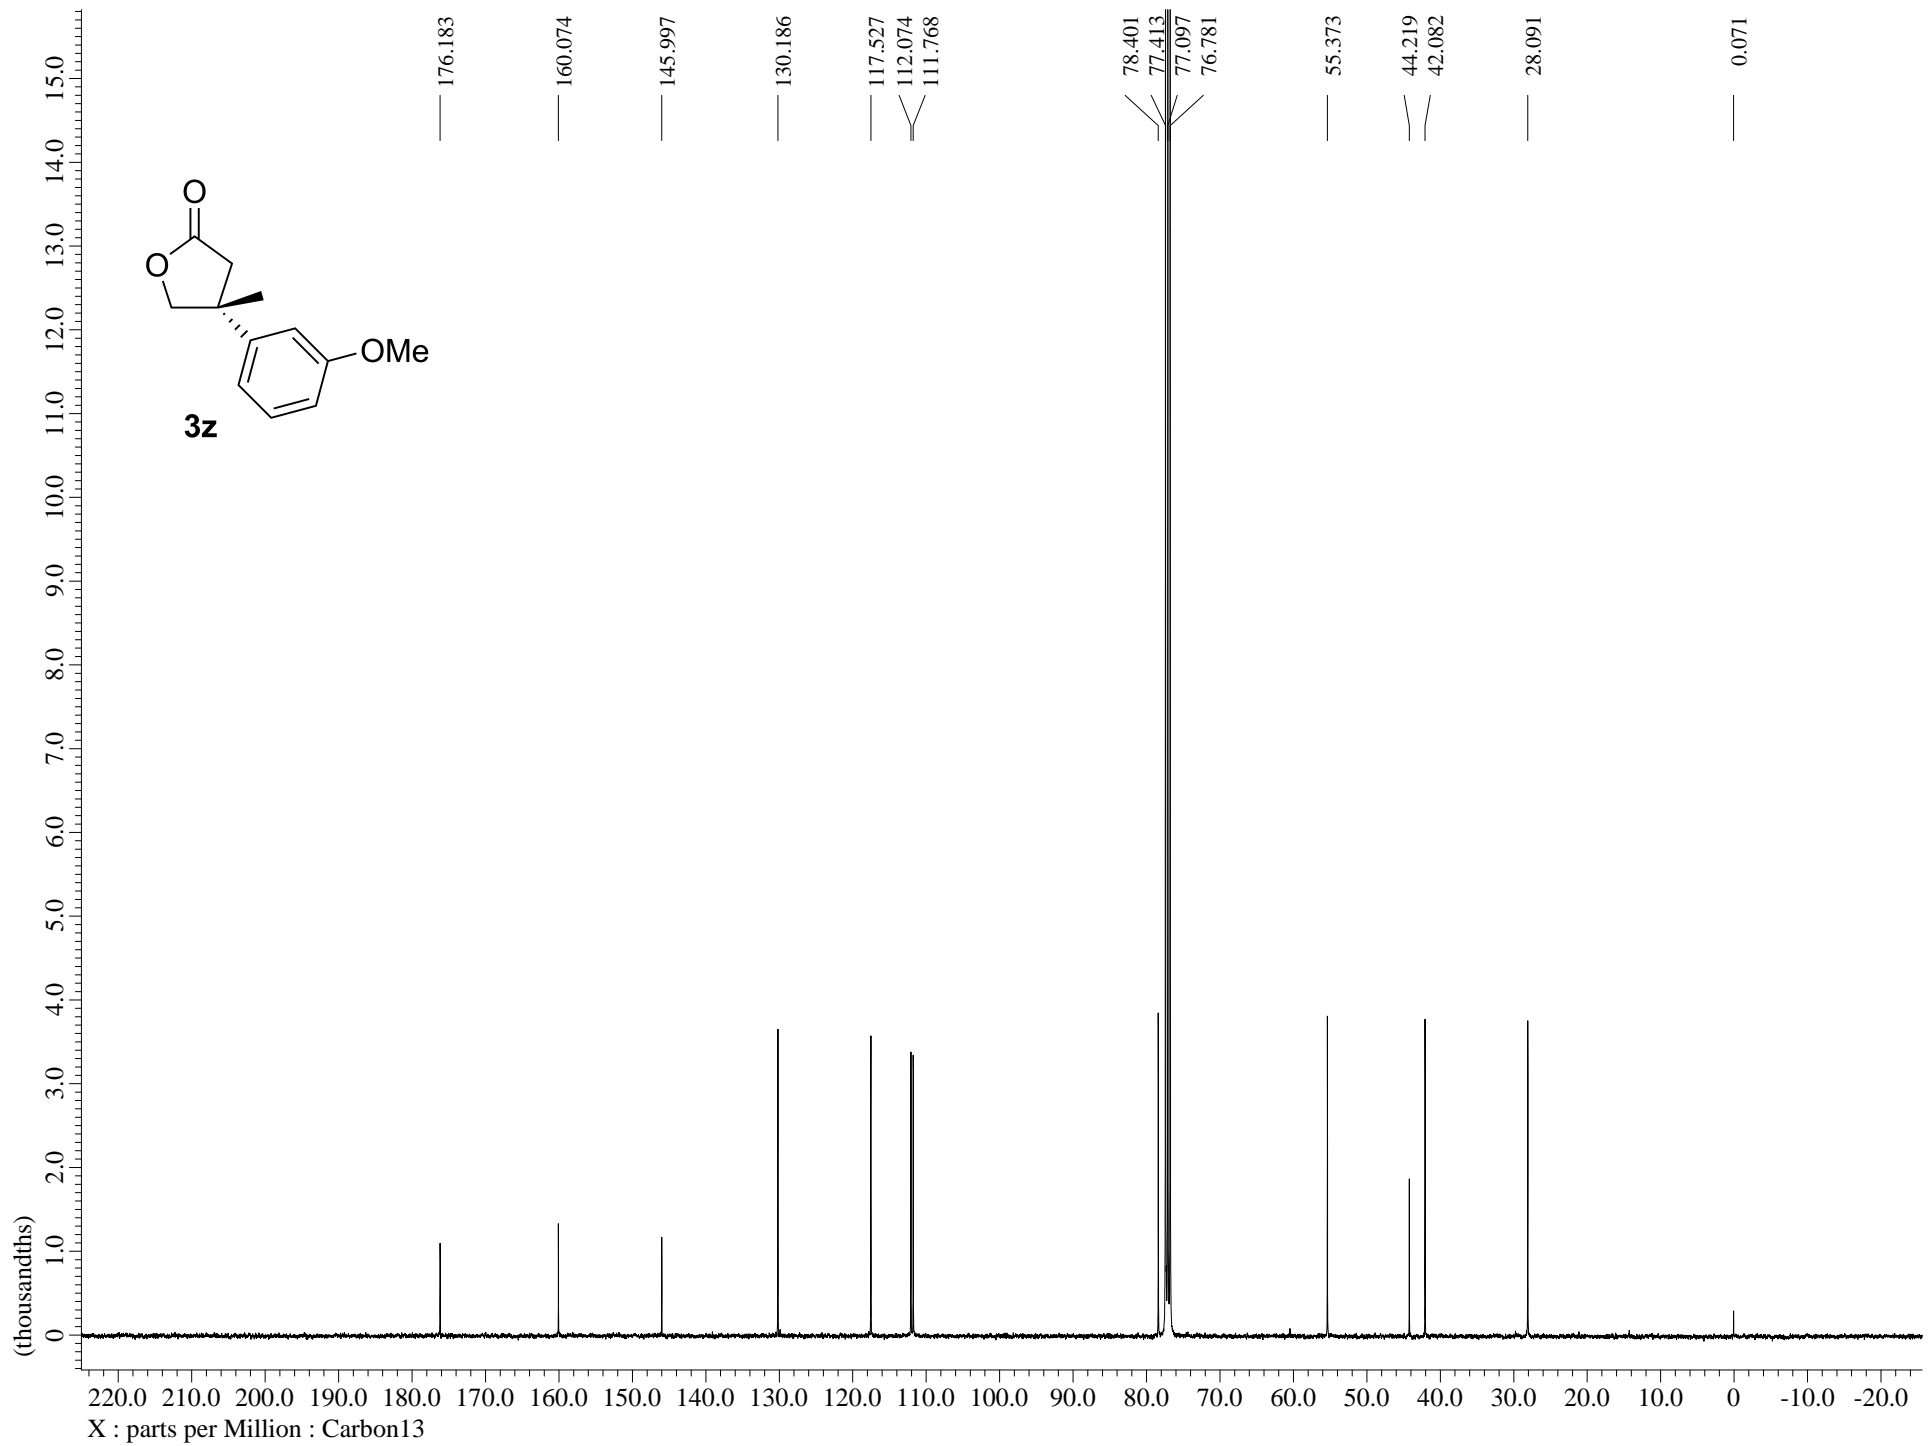

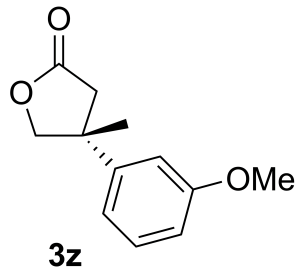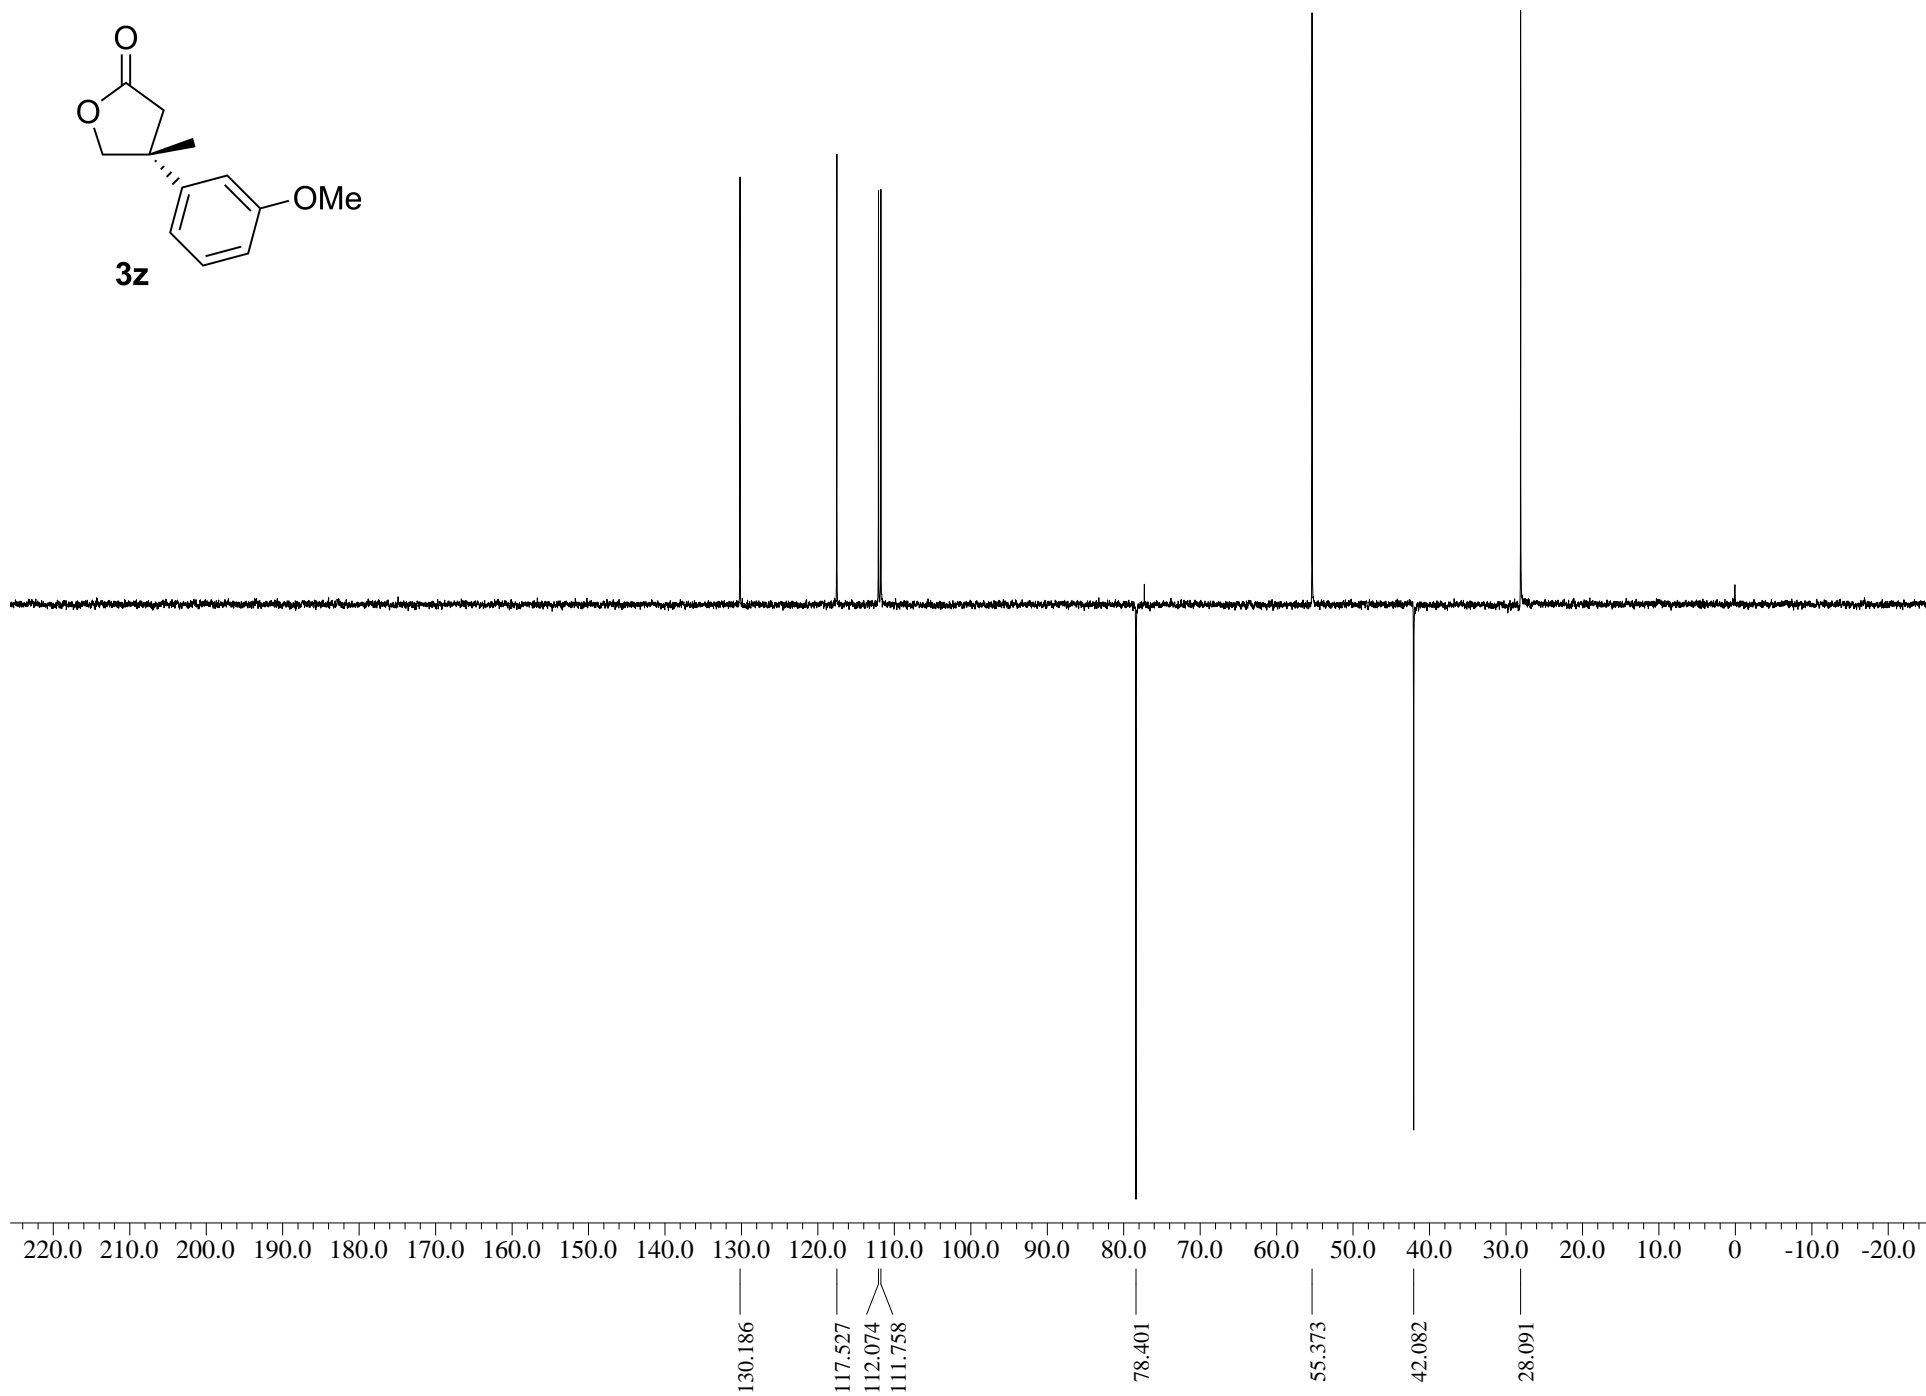

X : parts per Million : Carbon13

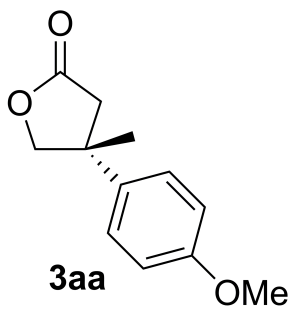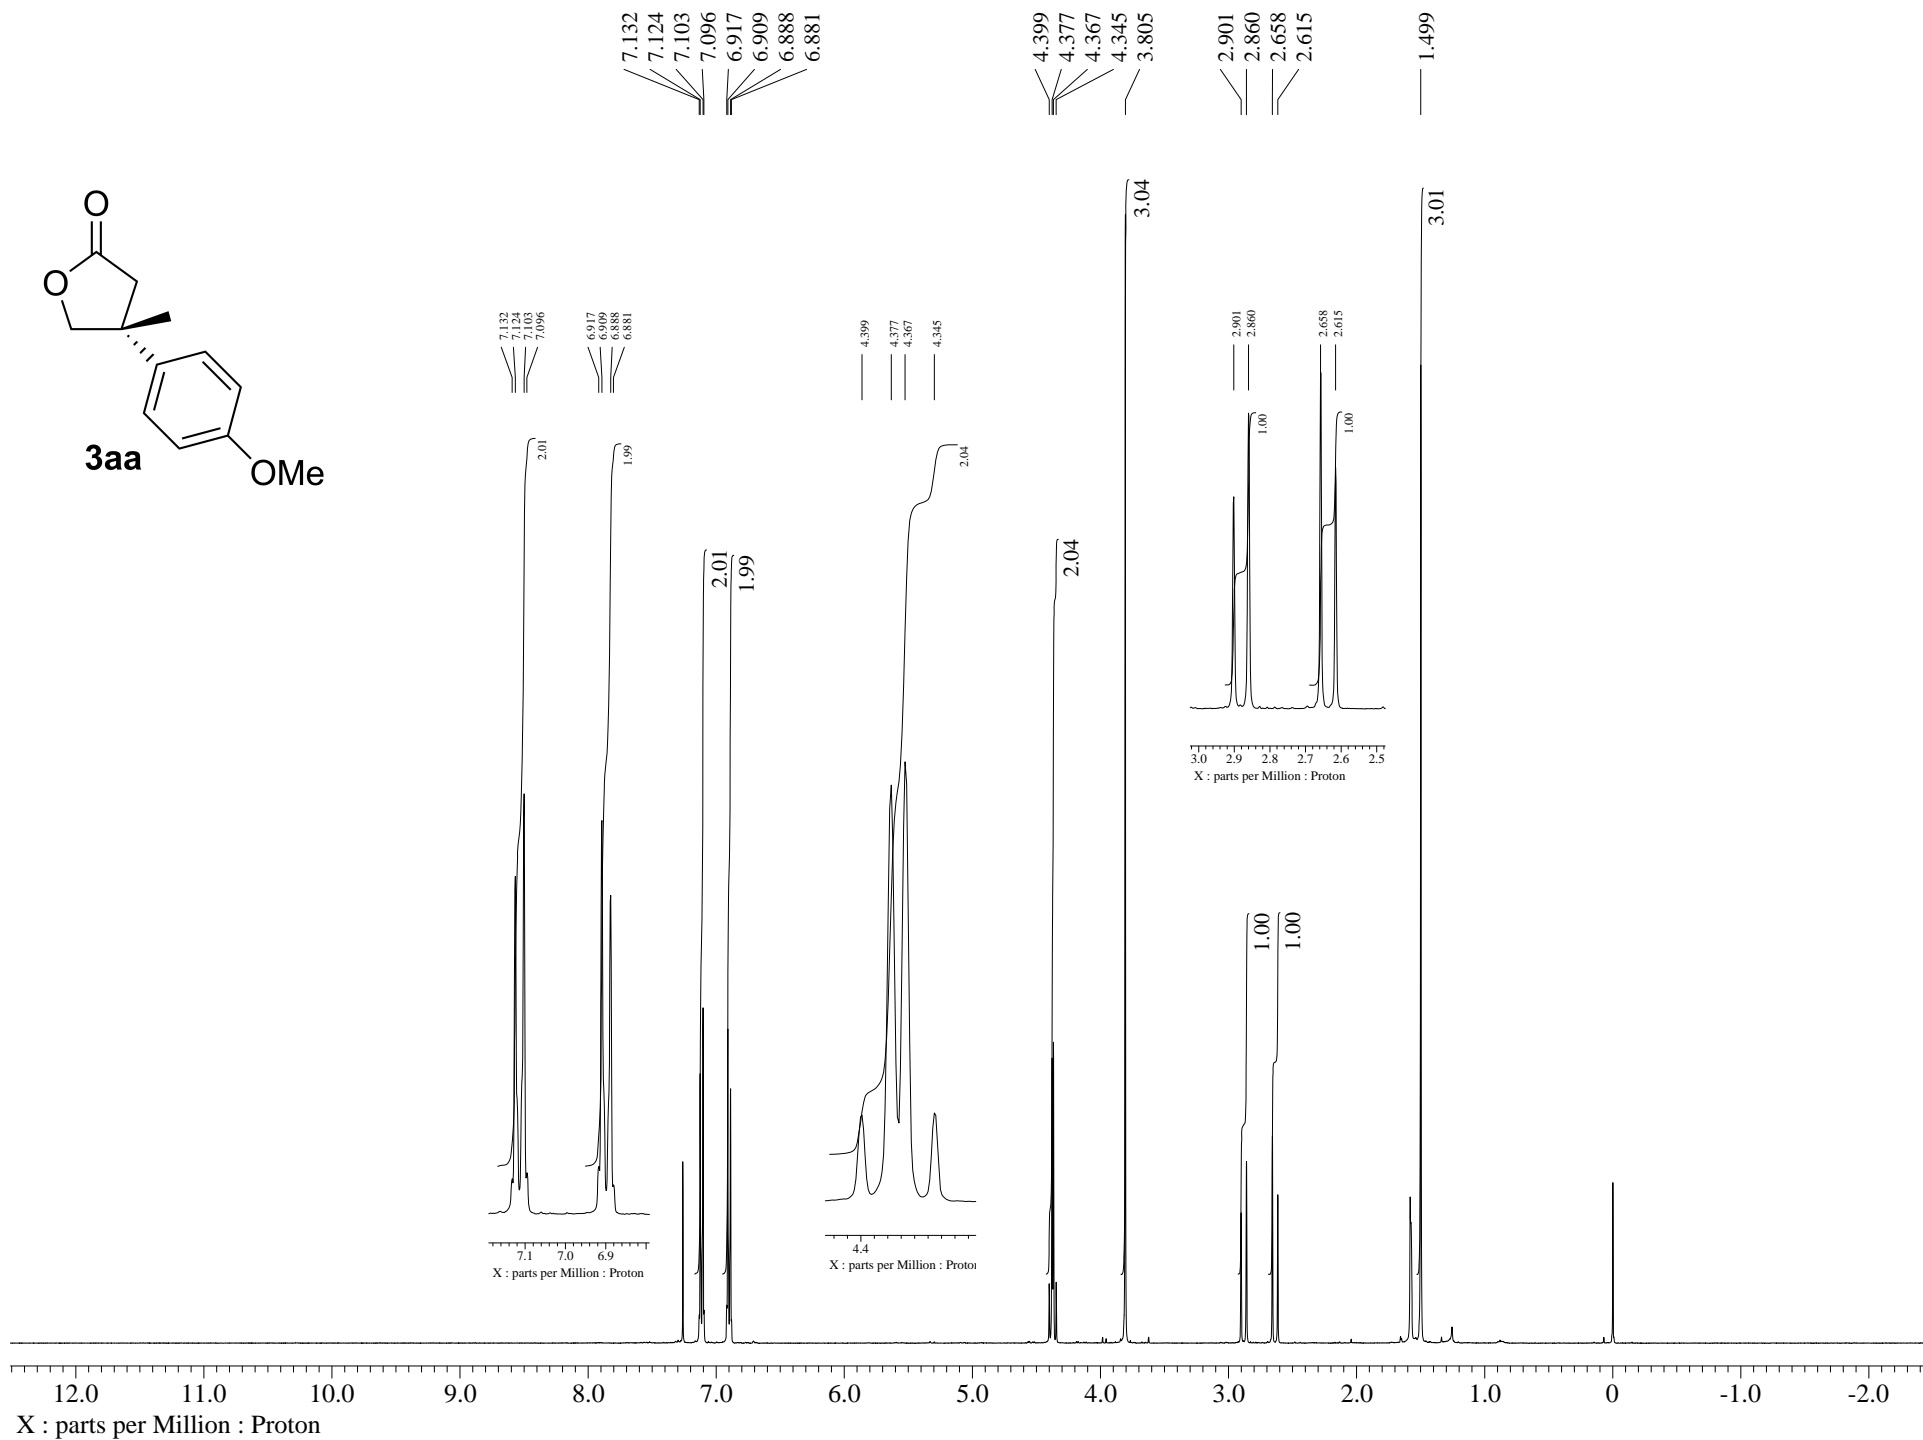

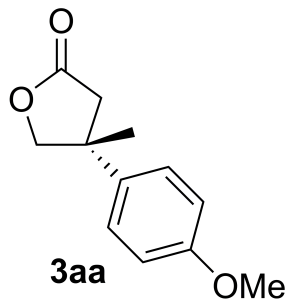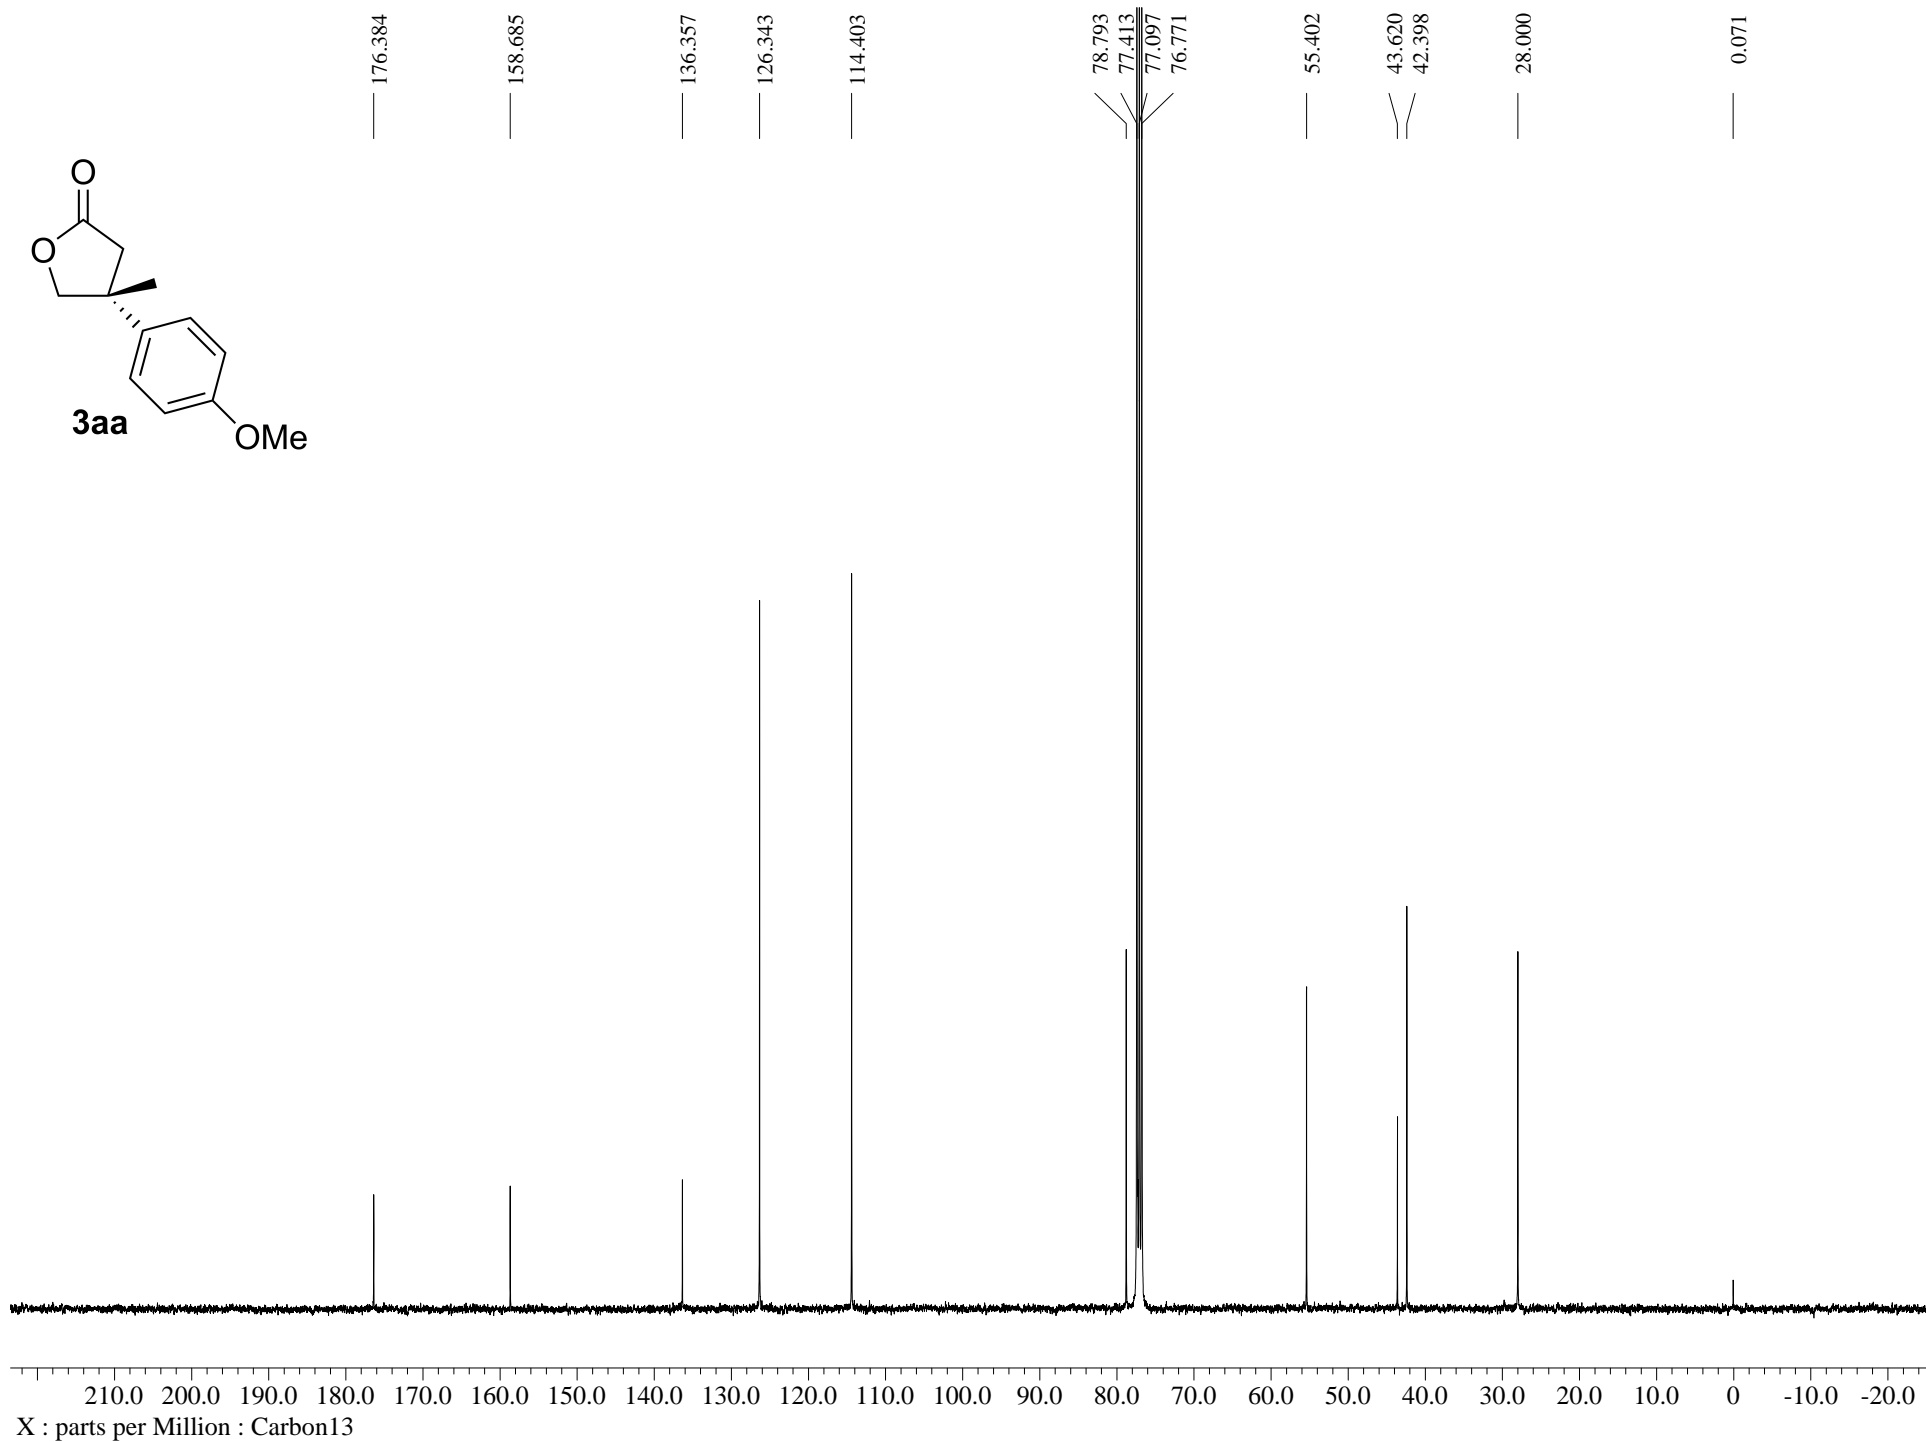

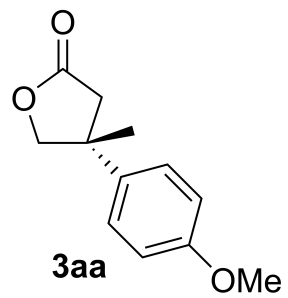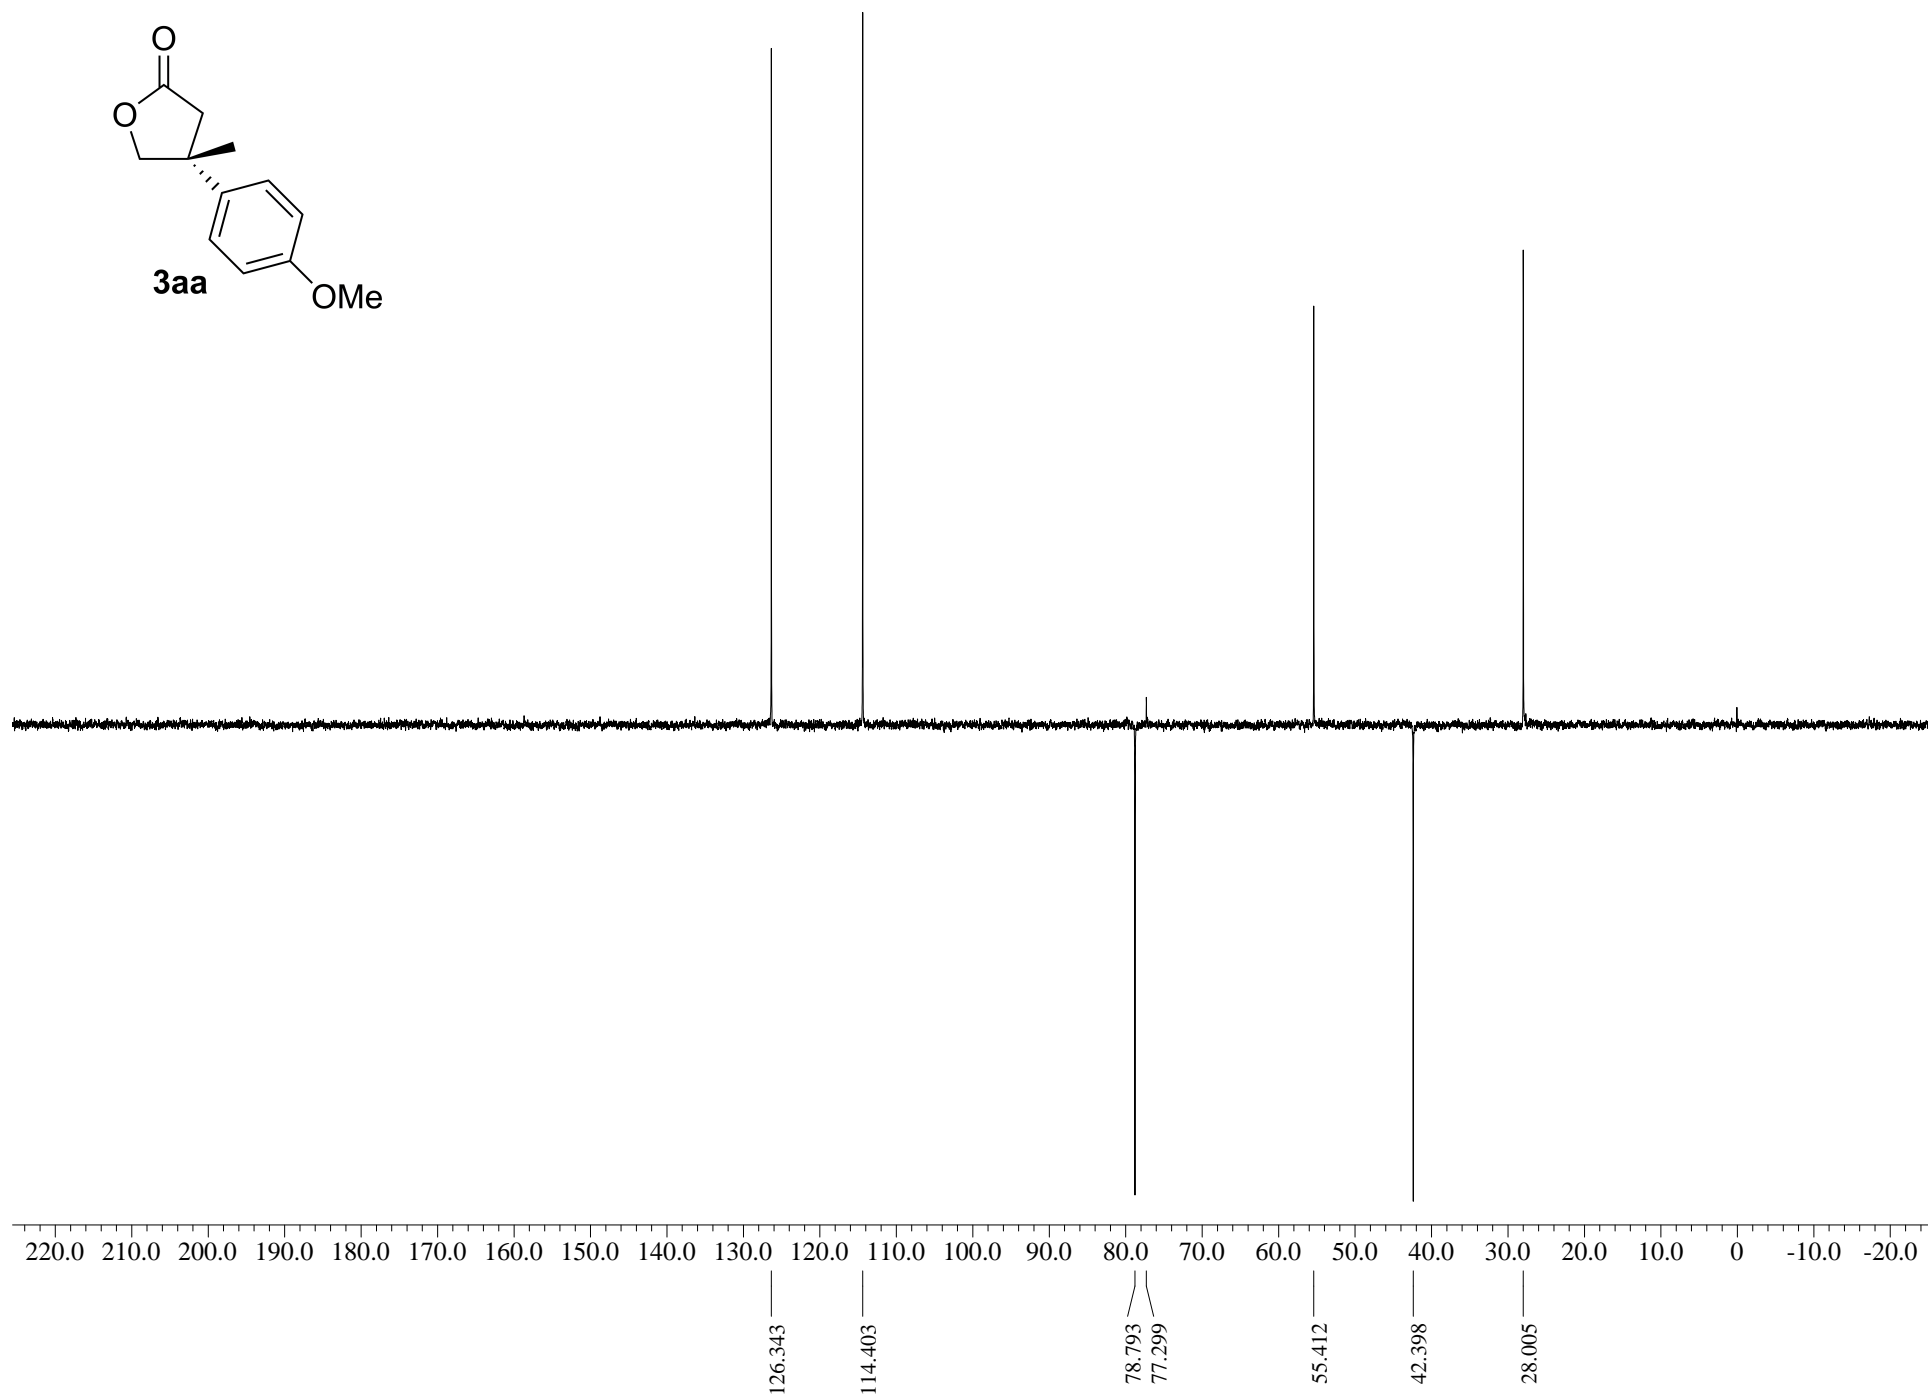

X : parts per Million : Carbon13

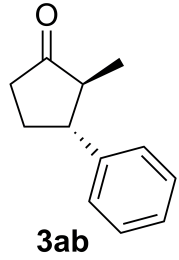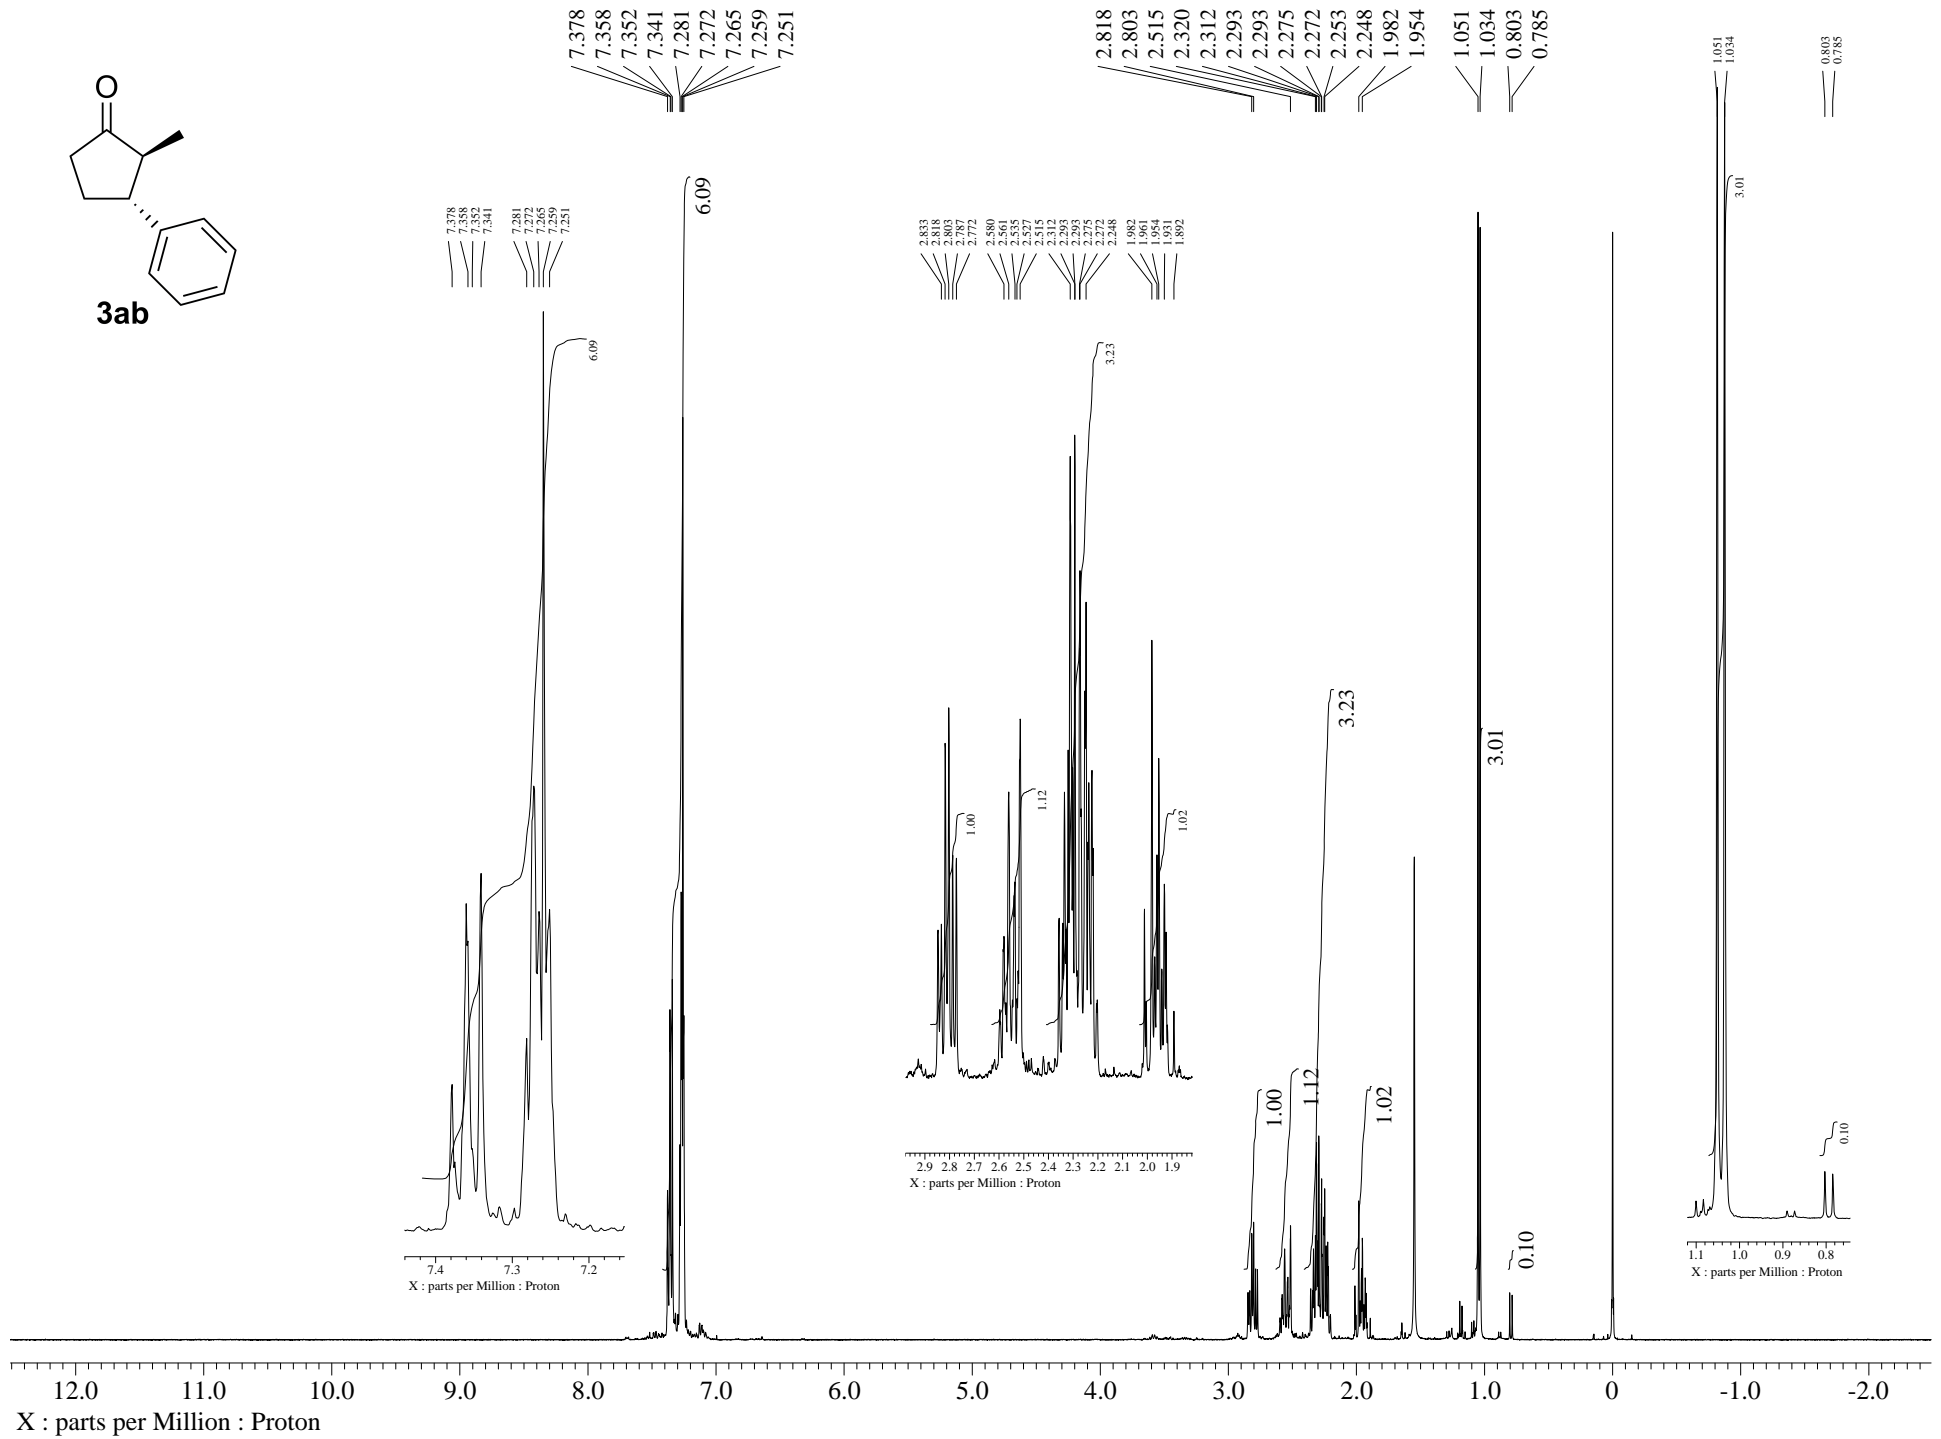



219.679

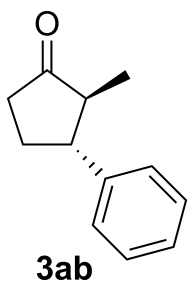

142.428

128.815

127.177

126.966

77.404

77.088

76.771

51.473

51.090

37.789

29.653

12.280

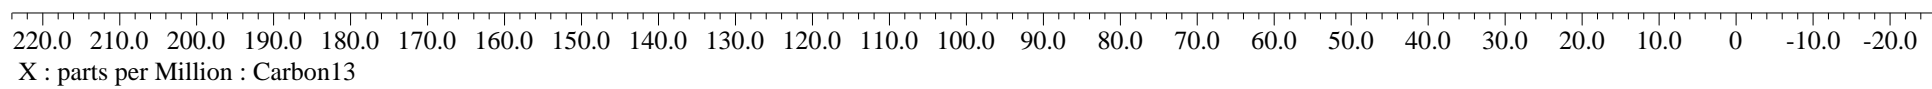

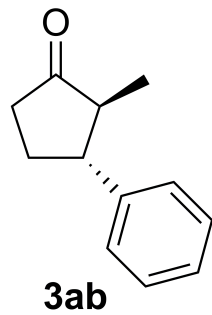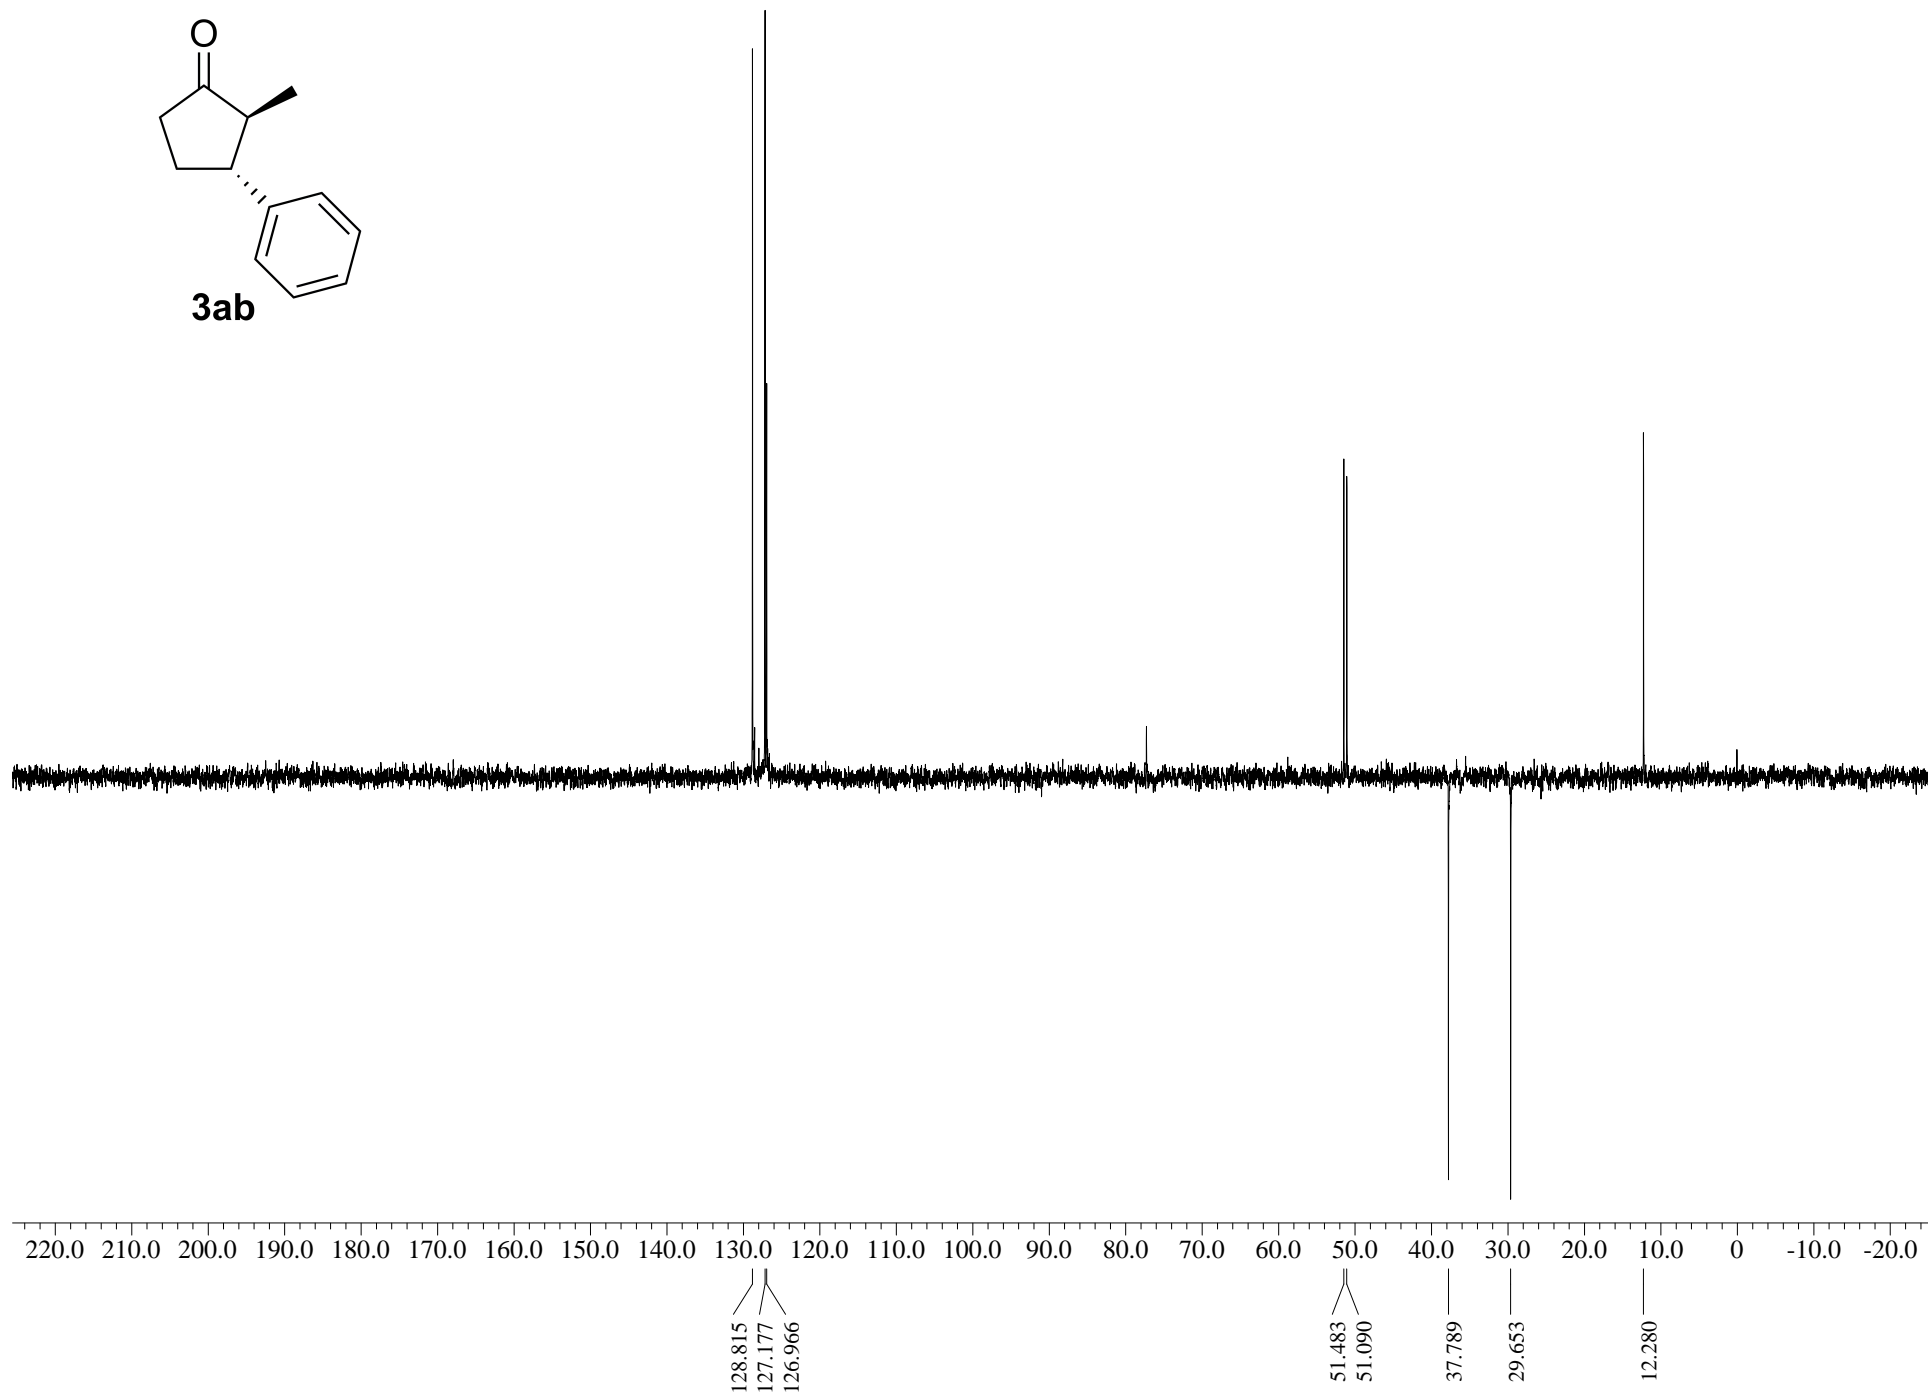

X : parts per Million : Carbon13

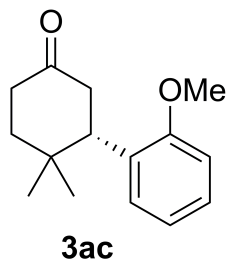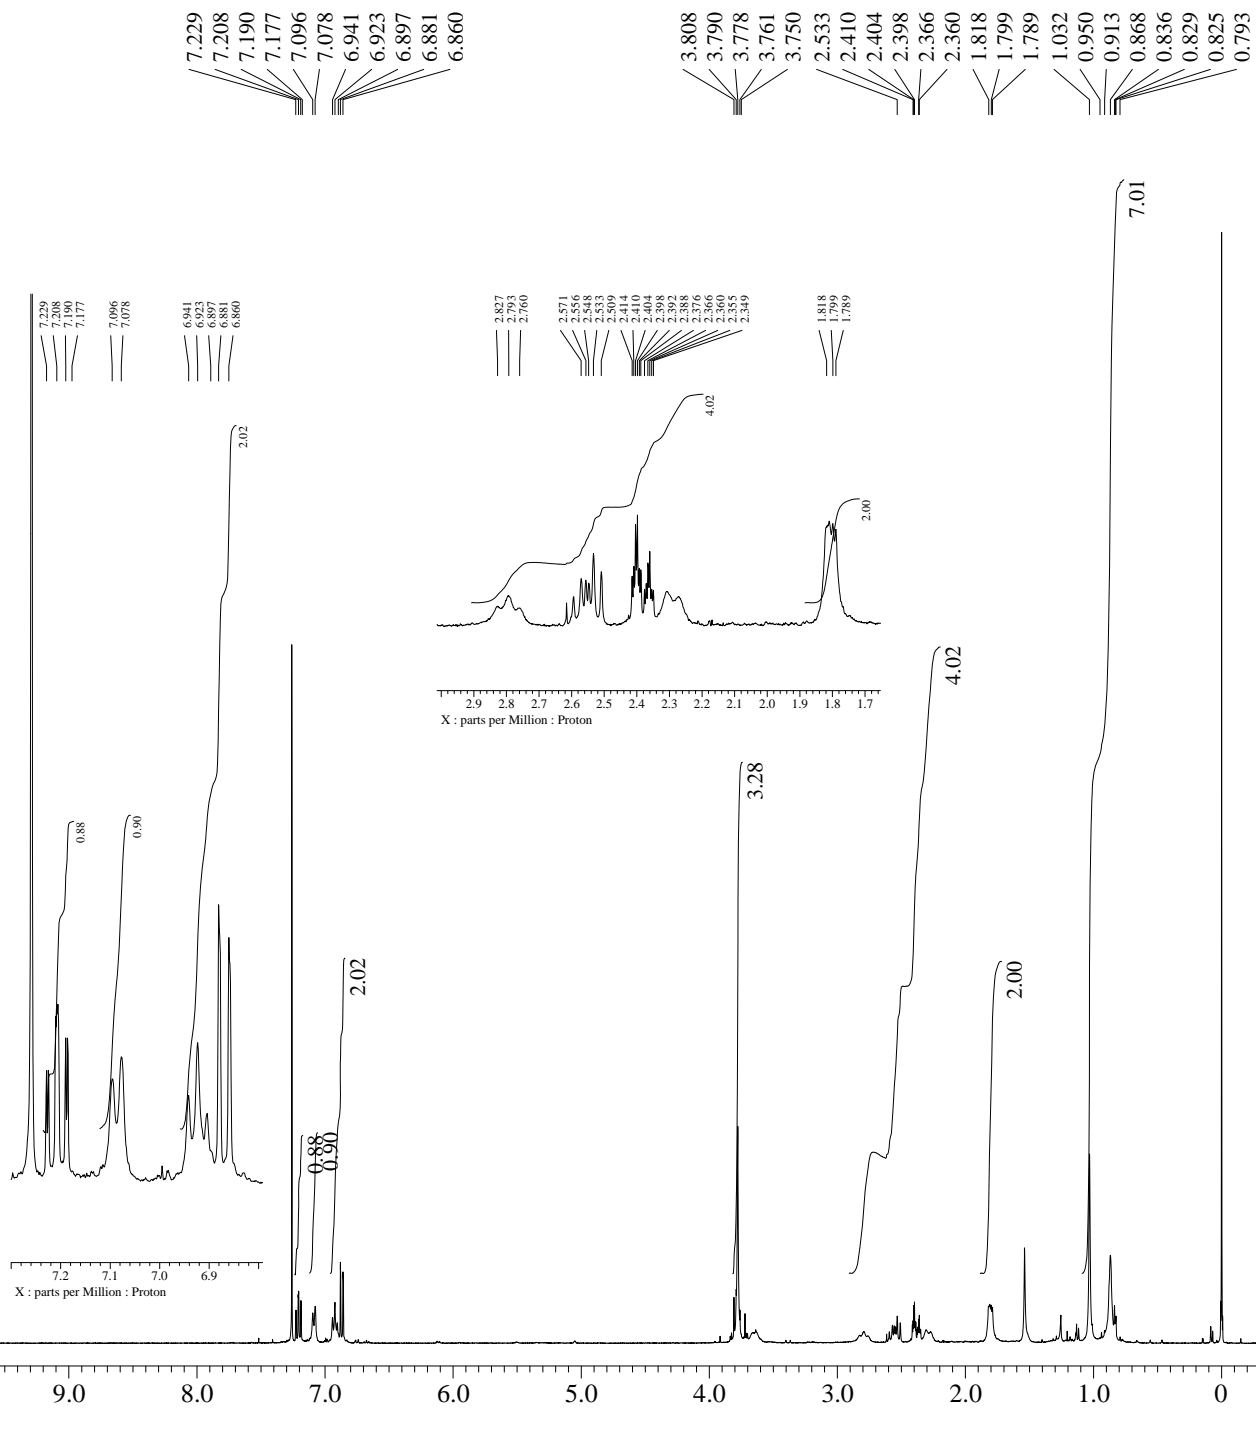

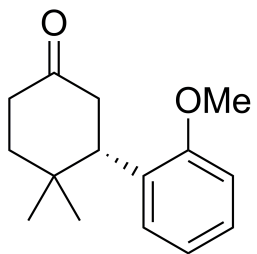

**3ac**

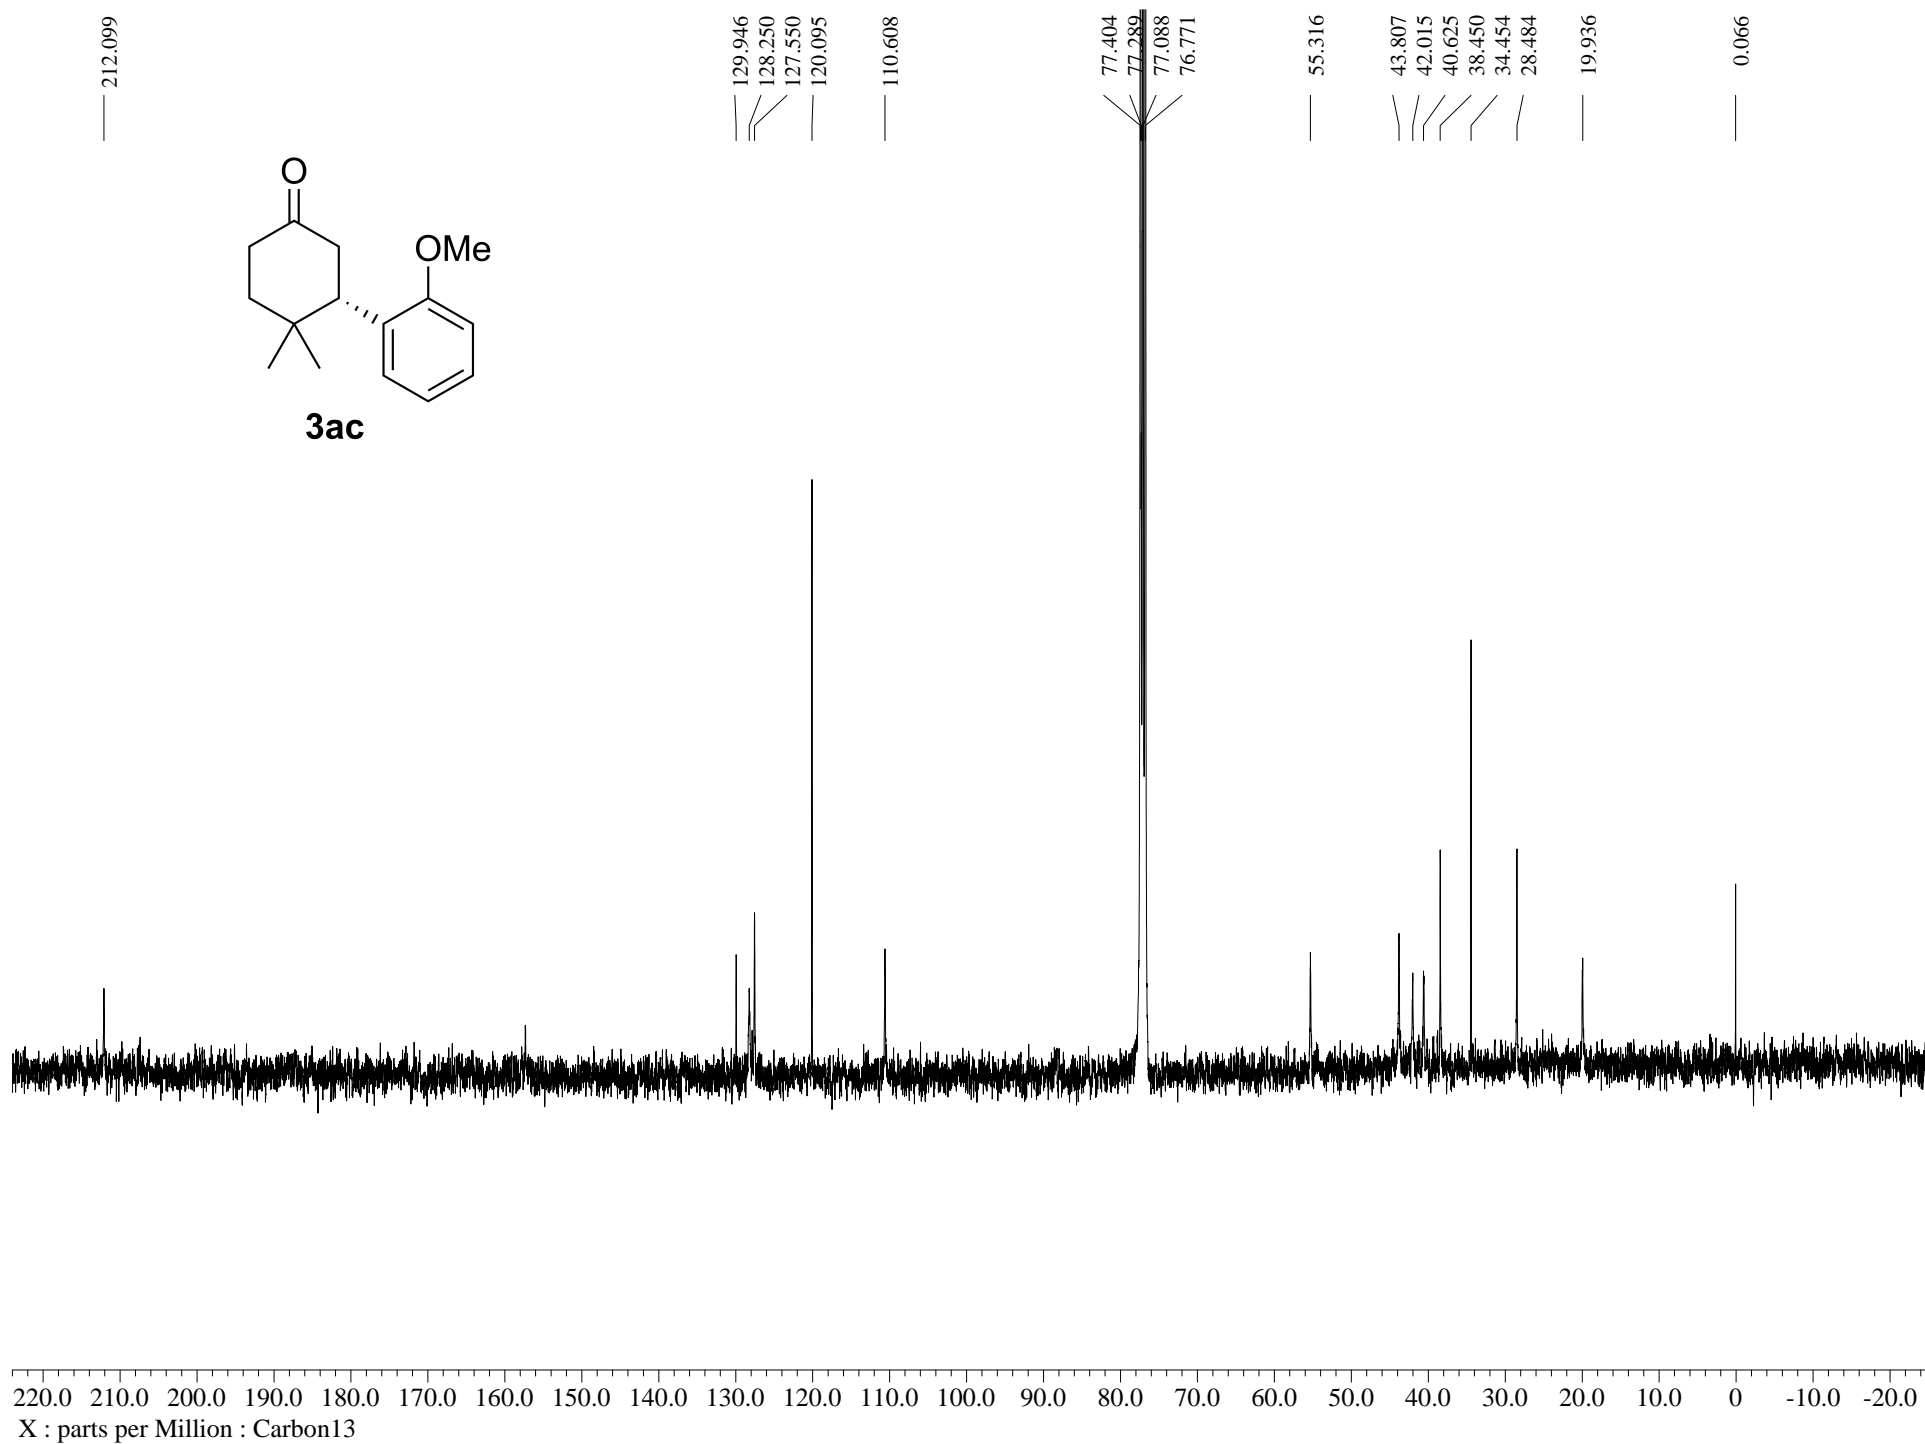

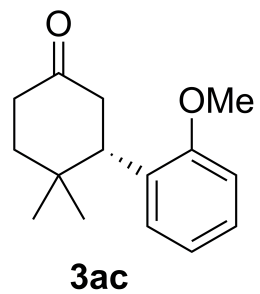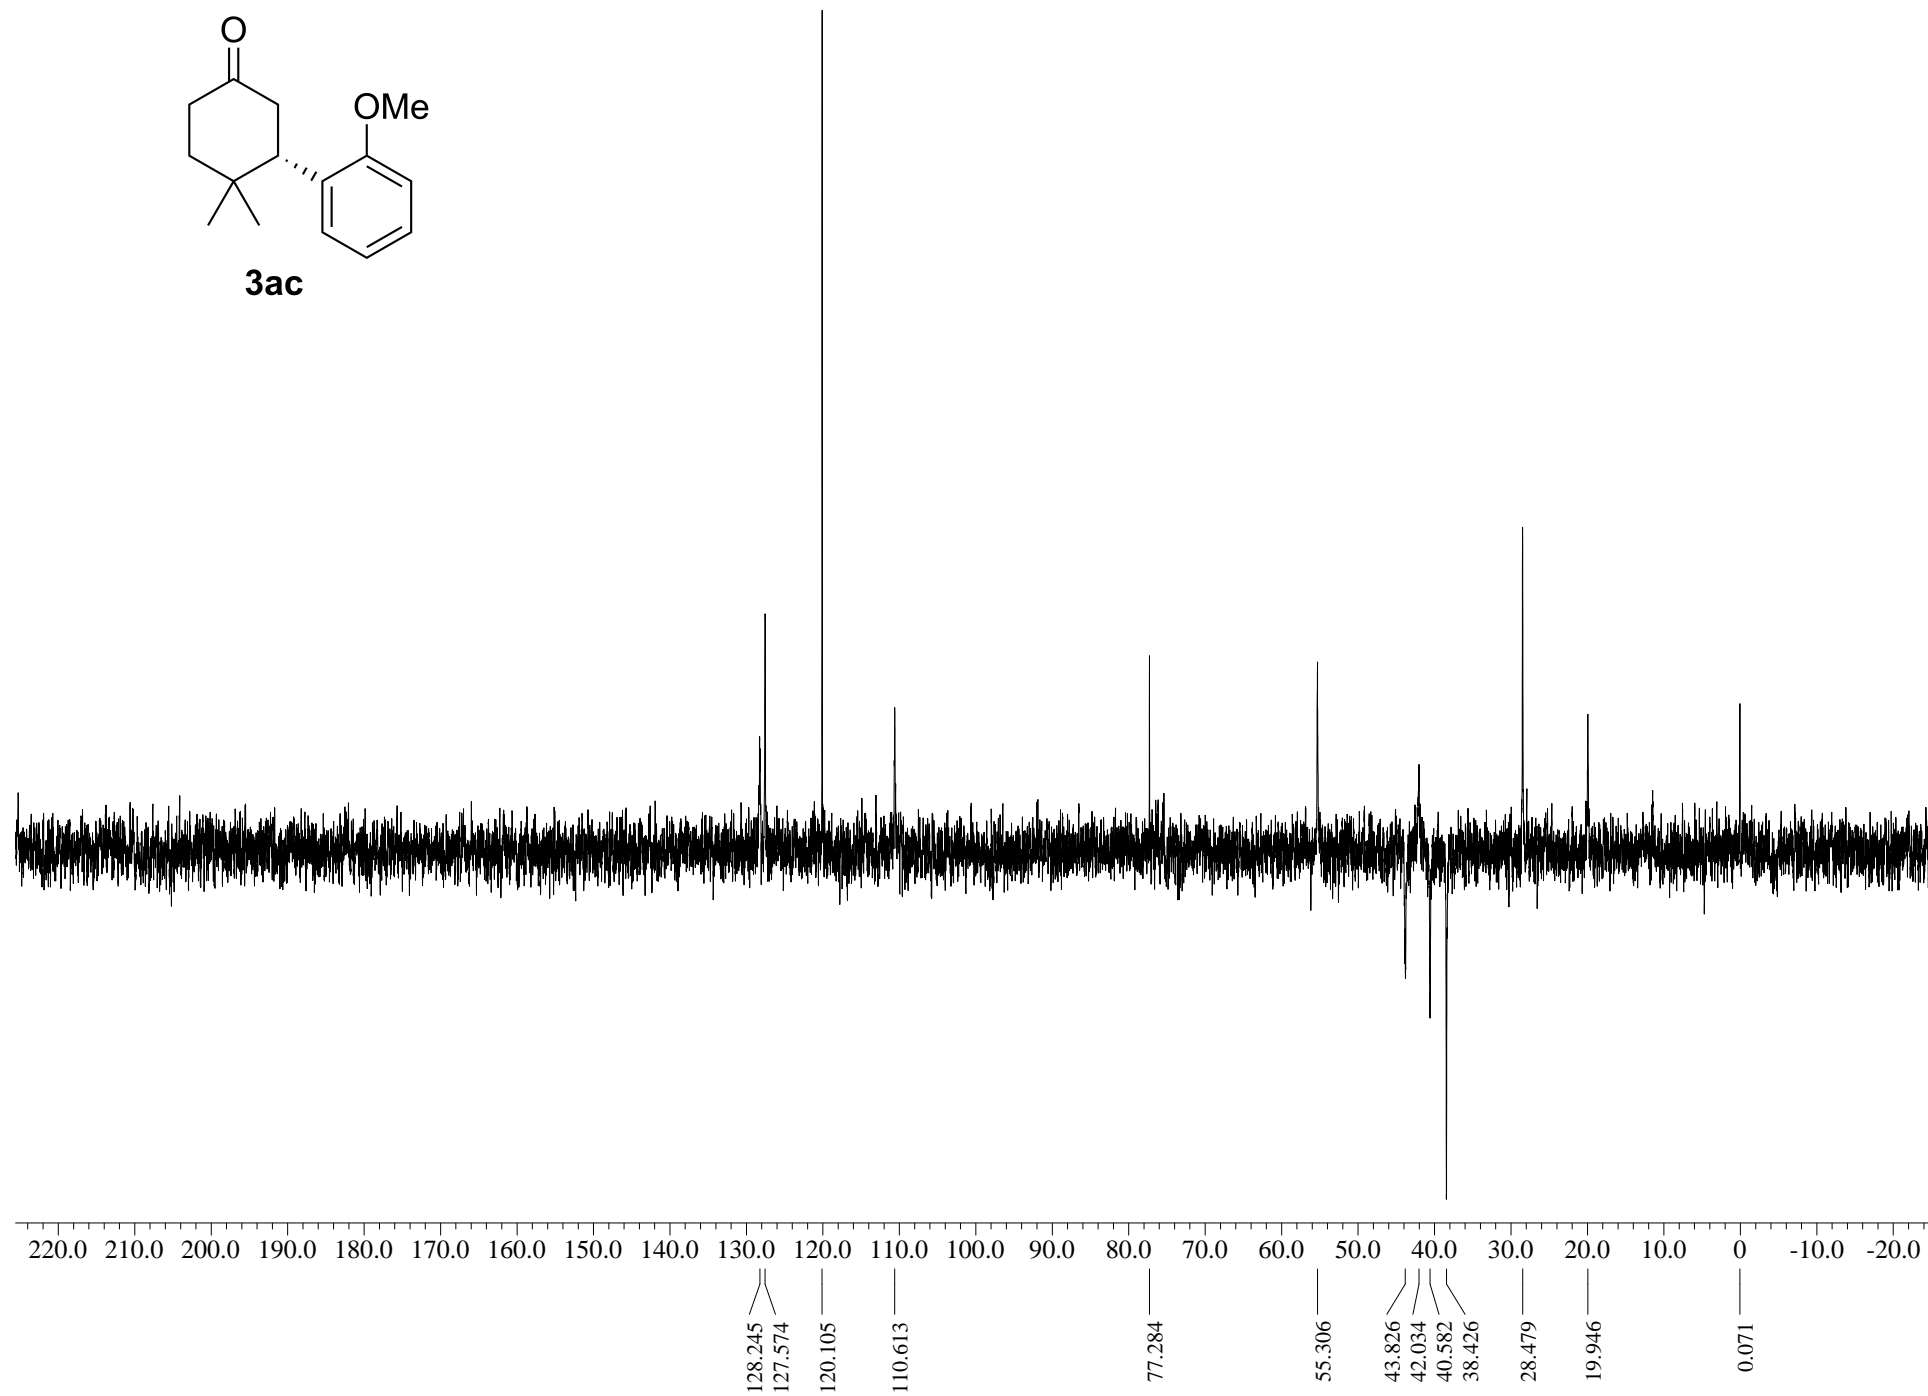

X : parts per Million : Carbon13

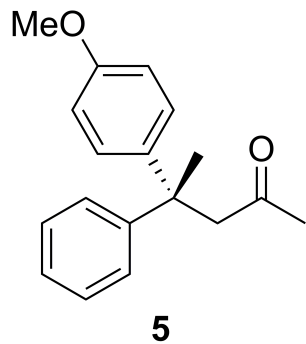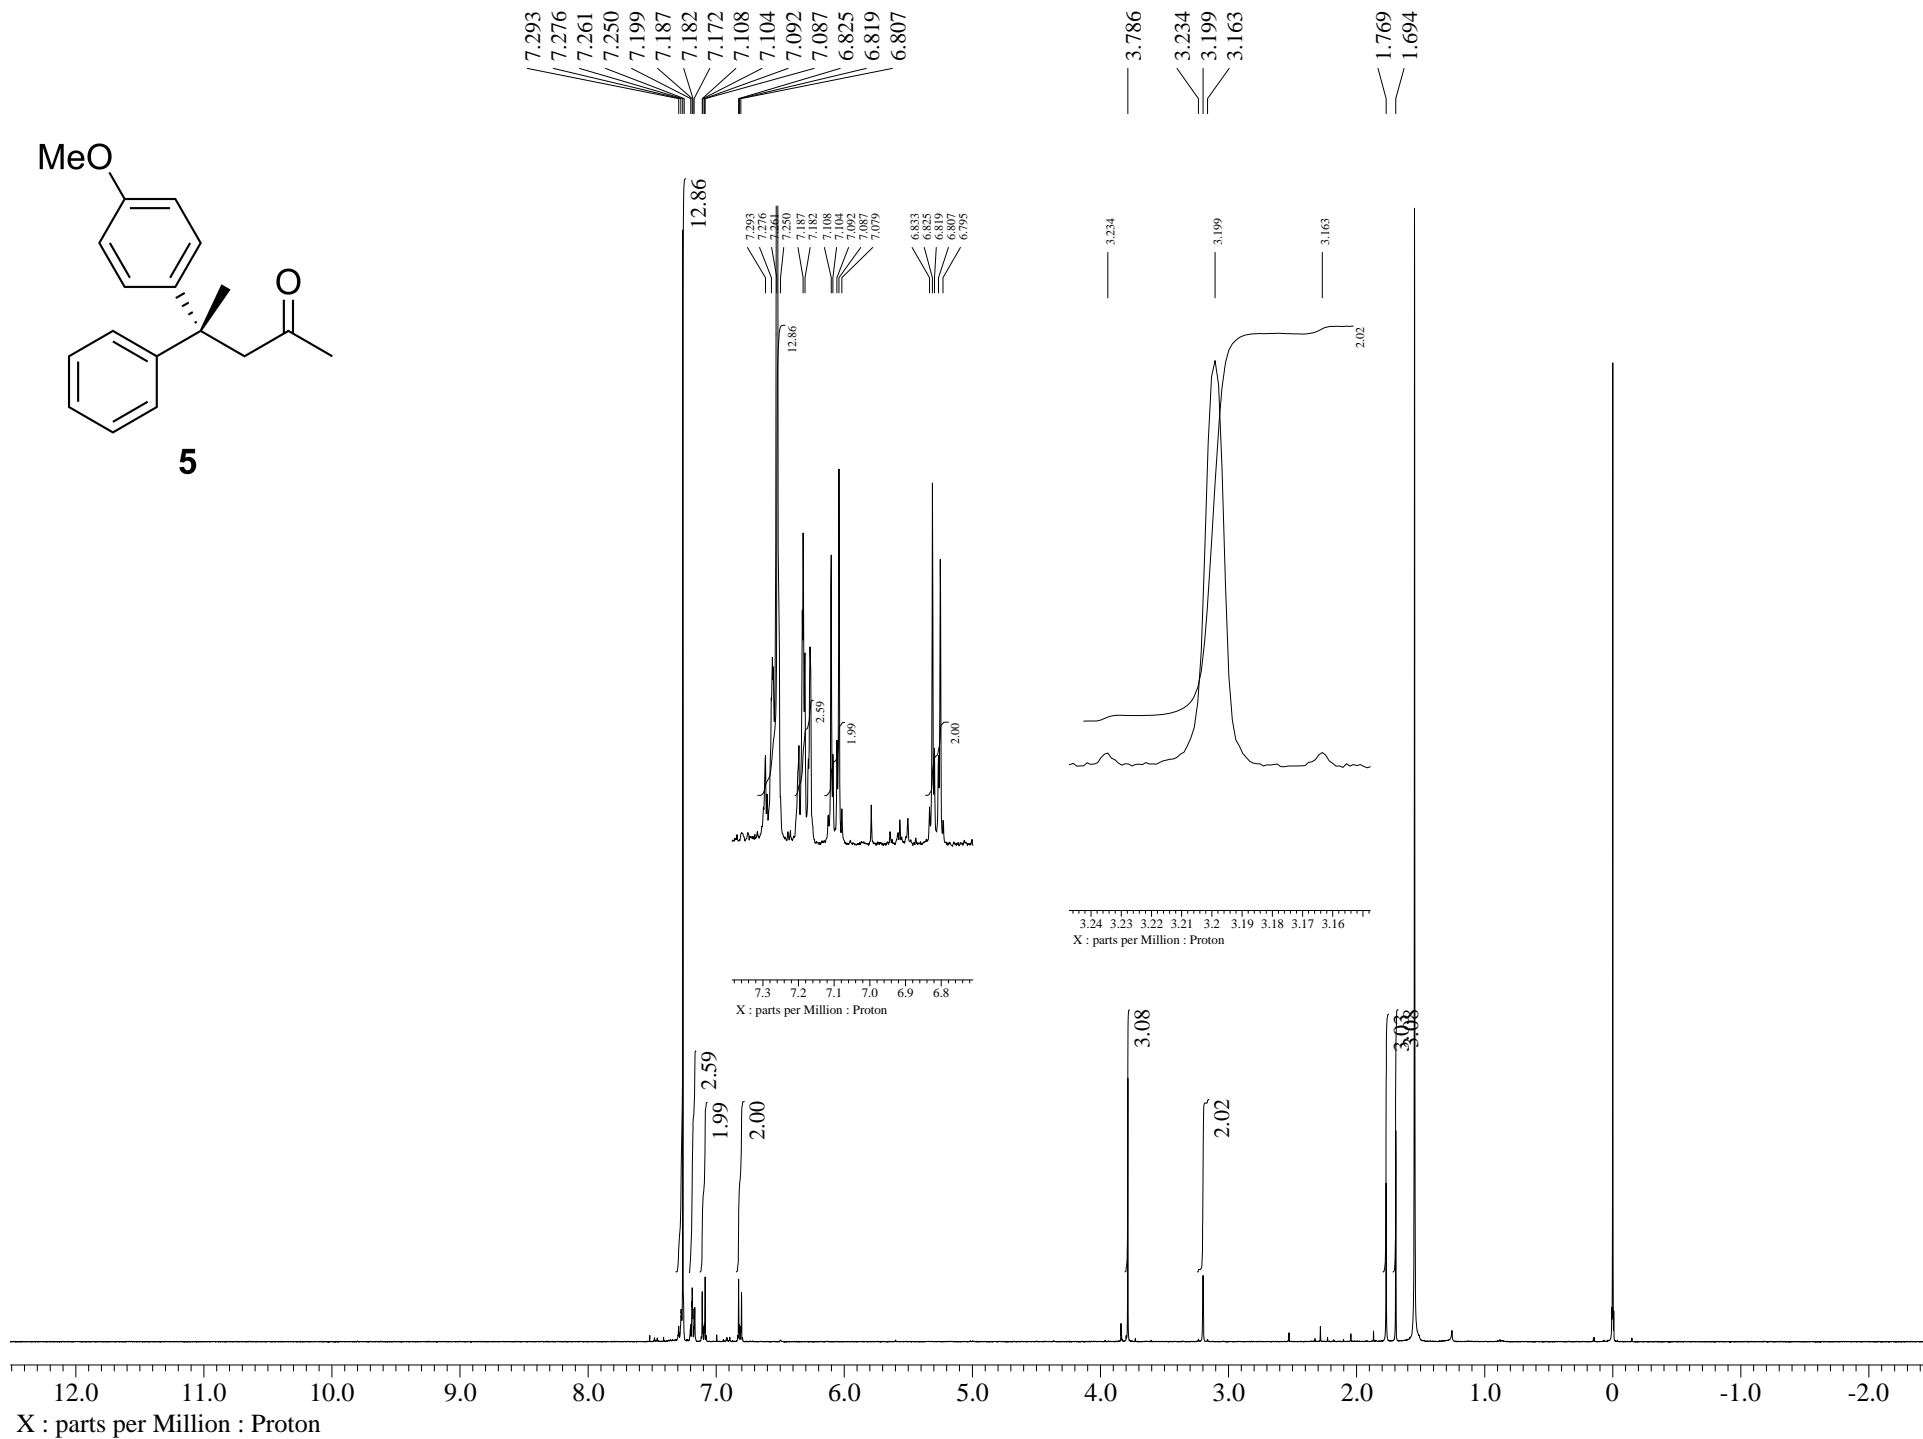

— 208.323

— 157.832

— 149.016

— 140.669

128.604

128.231

127.042

126.132

— 113.540

55.277

54.798

— 45.053

— 32.164

— 27.986

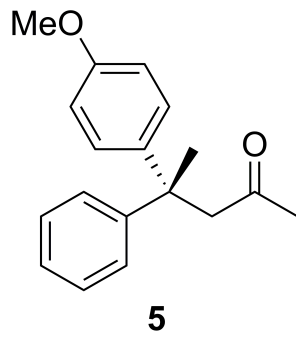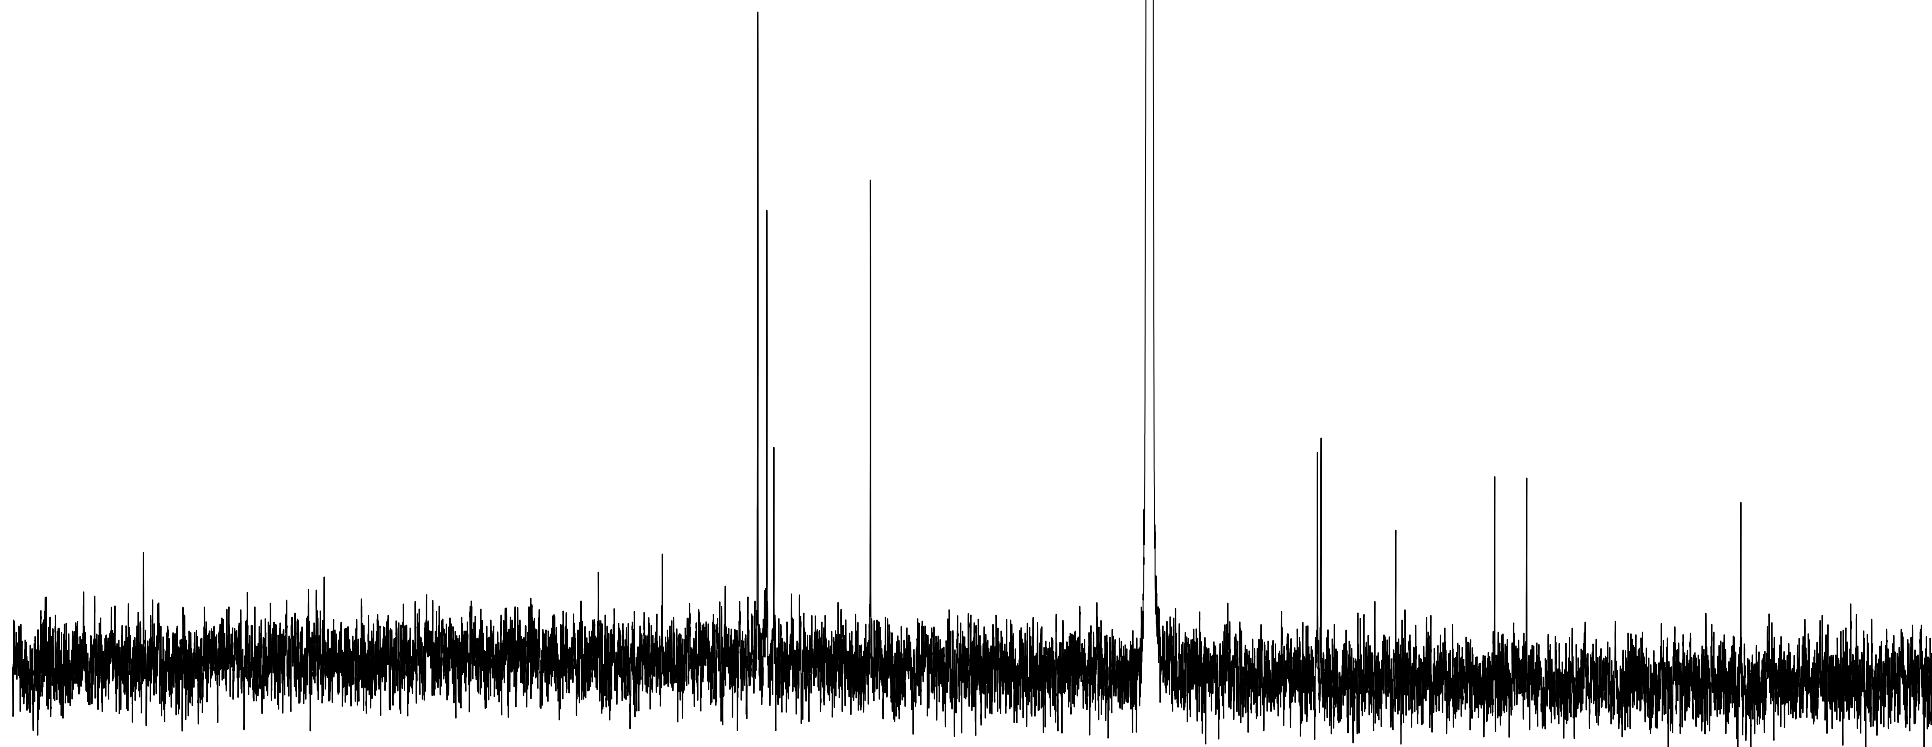

220.0 210.0 200.0 190.0 180.0 170.0 160.0 150.0 140.0 130.0 120.0 110.0 100.0 90.0 80.0 70.0 60.0 50.0 40.0 30.0 20.0 10.0 0 -10.0 -20.0  
X : parts per Million : Carbon13

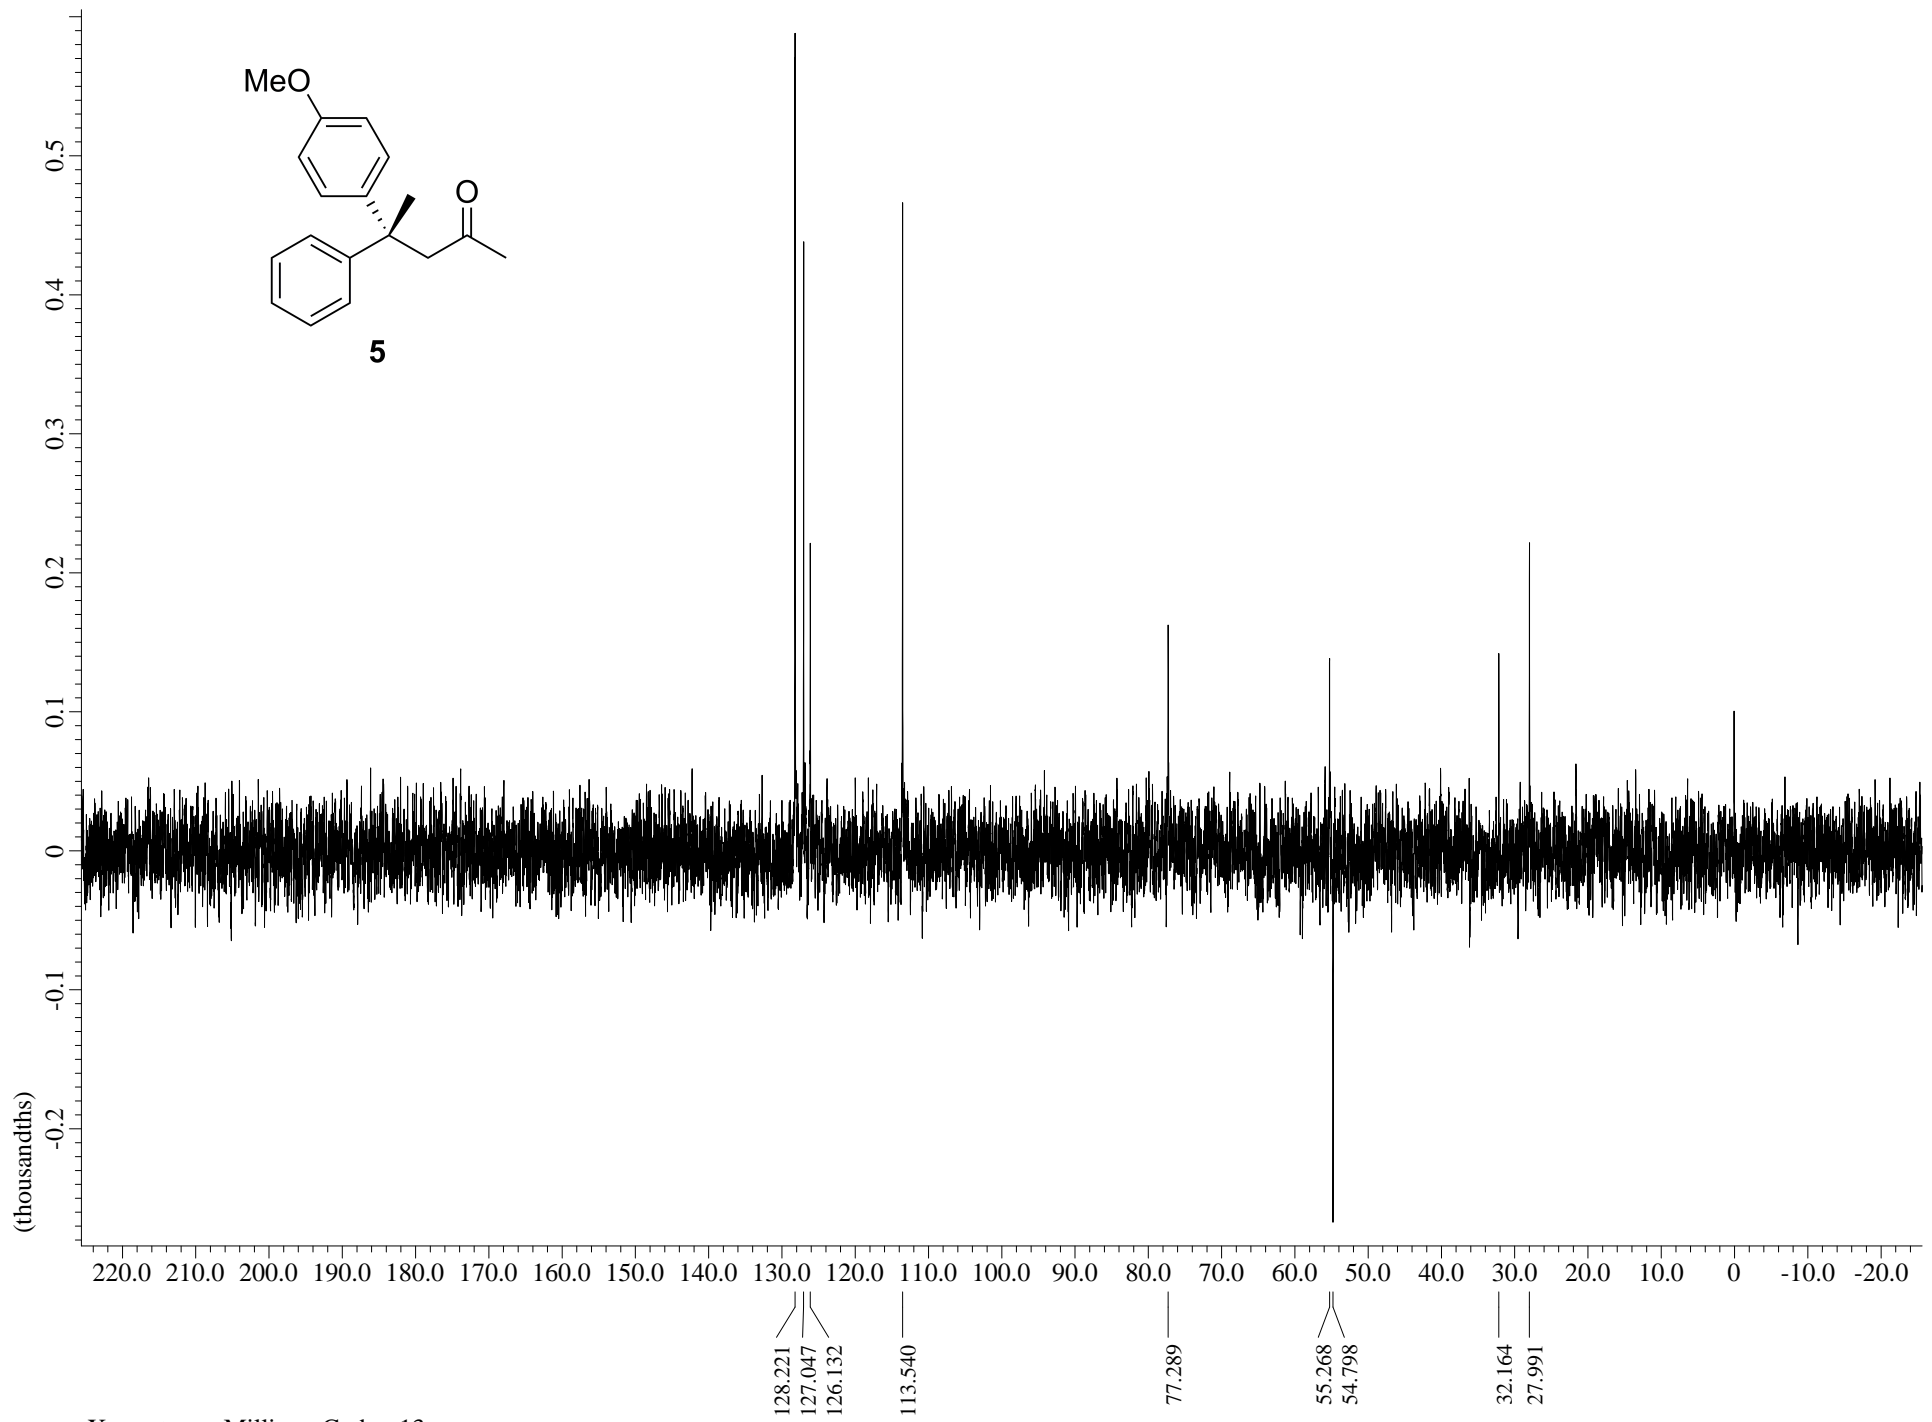

X : parts per Million : Carbon13
